# Supplementary material for: Ultrafast Backbone Protonation in Channelrhodopsin-1 Captured by Polarization Resolved Fs Vis-pump—IR-Probe Spectroscopy and Computational Methods
Source: MDPI journal article supplement (doi:10.3390/molecules25040848), 2020-02-14
Supplement: s1 [file s1]

## Ultrafast backbone protonation in channelrhodopsin-1 captured by polarization resolved fs Vis-pump – IR-probe spectroscopy and computational methods.

Till Stensitzki<sup>1</sup>, Suliman Adam<sup>2</sup>, Ramona Schlesinger<sup>1</sup>, Igor Schapiro<sup>2</sup>, Karsten Heyne<sup>1</sup>

<sup>1</sup>Institut für Experimentalphysik, Freie Universität Berlin, Arnimallee 14, 1495 Berlin

<sup>2</sup>Fritz Haber Center for Molecular Dynamics Research, Institute of Chemistry, The Hebrew University of Jerusalem, Israel

### S1. Detailed discussion of 1530 cm<sup>-1</sup> to 1650 cm<sup>-1</sup> region

Since isomerization takes place with 100 fs, i.e. faster than the time-resolution of this experiment<sup>2</sup>, we don't observe excited state contributions in Figure 2. Hence, all positive signals are due to absorption of the photoproduct and all negative signals are induced by ground-state bleaching. We know from our previous works<sup>1,2</sup> that the dynamics of retinal are described with time-constants of 500 fs and 5 ps. Thus, spectral changes on these time scales indicate retinal contributions while slower spectral changes within tens of ps are an indication for protein contributions.

The position of the retinal modes in CaChR1 is well known from resonance Raman spectroscopy<sup>3-5</sup>, therefore we start by assigning the retinal modes in our transient spectra (Figure 2).

The negative peaks at 1540 cm<sup>-1</sup> and 1623 cm<sup>-1</sup> can be attributed to the bleaching of the ground-state all-*trans* retinal C=C stretching vibration and the C=N-D stretching vibration of the deuterated Schiff's base (SB). The assignment is supported by the dichroic ratio of both bands: for each band the ratio is larger than two, indicating a near parallel orientation of the corresponding vibrational tdm to the electronic tdm, in line with previous measurements.<sup>6,7</sup> Additionally, both bands are partially decaying within the first 10 ps, in agreement with our prior studies of the C-C fingerprint region. The peak at 1623 cm<sup>-1</sup> shows a slower decay as well, likely due to an additional obscured band located at 1627 cm<sup>-1</sup>, as the neighboring band at 1633 cm<sup>-1</sup> shows almost identical changes.

The high-frequency edge of the bleaching signal at 1540 cm<sup>-1</sup> shows additional changes in tens of picoseconds centered at 1552 cm<sup>-1</sup>, likely caused by an underlying protein contribution from a COO-antisymmetric stretching (as) vibration. On the low-frequency side of the 1540 cm<sup>-1</sup> signal a positive peak at 1530 cm<sup>-1</sup> is rising with 5 ps. This peak can be attributed to the 13-*cis* retinal C=C stretching vibration of the P<sub>1</sub> state, as reported in the aforementioned resonance Raman studies<sup>3-5</sup>.

A broad, partly structured, positive band appears between 1560 cm<sup>-1</sup> and 1610 cm<sup>-1</sup>. The broad band decays partially in 5 ps, which is an indication that retinal modes are contributing in this region. The peak at 1602 cm<sup>-1</sup> of this band can be attributed to the SB C=N-D vibration in the product state P<sub>1</sub>, again following the assignment from previous RR studies. Like its ground-state bleaching band, it follows the retinal dynamics and has a dichroic ratio between 2 and 3, again indicating parallel orientation thus supporting the established assignments. The rest of the region is difficult to assign: There are two smaller negative bands at 1600 cm<sup>-1</sup> and 1585 cm<sup>-1</sup>, which are either caused by band shifts or by protonation of COO- asymmetric stretching vibrations from aspartates or glutamates. A band-shift also results in a positive signal next to the negative band. Hence, part of the

broad positive signal could be due to the frequency shift of these two modes. At  $1575\text{ cm}^{-1}$  a positive band with a dichroic of  $\sim 2$  is identifiable (Fig. 2). Since the dichroic ratio is different to the adjacent bleaching peak at  $1586\text{ cm}^{-1}$ , it is unlikely that they belong together. Instead this signal could be due to an asymmetric stretching  $\text{COO}^-$  mode of Glu. Further contributors to the signal of the broad band could be  $\text{C}=\text{N}$  stretching vibration of arginine<sup>8,9</sup> in a salt-bridge with a carboxylic acid.

The assignment of the negative band at  $1635\text{ cm}^{-1}$  is unclear. It has a slightly smaller strength than the SB stretching mode and has a dichroic ratio of about 1. A similar band is also observed in *CrChR2* and was attributed to an arginine  $\text{C}=\text{N}$  vibration.<sup>10</sup> Ogren proved that protein contributions also appear in 80K-FTIR difference spectra in this region. It cannot stem from a partially deuterated sample, since the  $\text{C}=\text{N-H}$  SB vibration in *CaChR1* is located at  $1646\text{ cm}^{-1}$ . Potential contributions from the residues located in the vicinity of the retinal could be tryptophan ring vibrations and arginine  $\text{C}=\text{N}$  stretching vibrations.

## **S2. Comparison of the measured angles with angles in the homology model.**

We calculated the relative angles between the electronic tdm of retinal and the C=O groups in the homology model (see S2). Since ultrafast processes in molecules are typically located around its excitation site and propagate with about five angstroms per picosecond, it is reasonable to expect ultrafast interactions within 350 fs (the system response of the experiment) to be located close to the retinal.<sup>11</sup> Thus, we focused on C=O groups in a 6 Å distance of the retinal C<sub>14</sub> atom given by the homology model. The calculated angles are presented in Figure S1. Only the calculated relative angles of the backbone C=O group of Glu169 and of the carboxyl C=O group of Glu169 agree within the given error margins with the measured values.

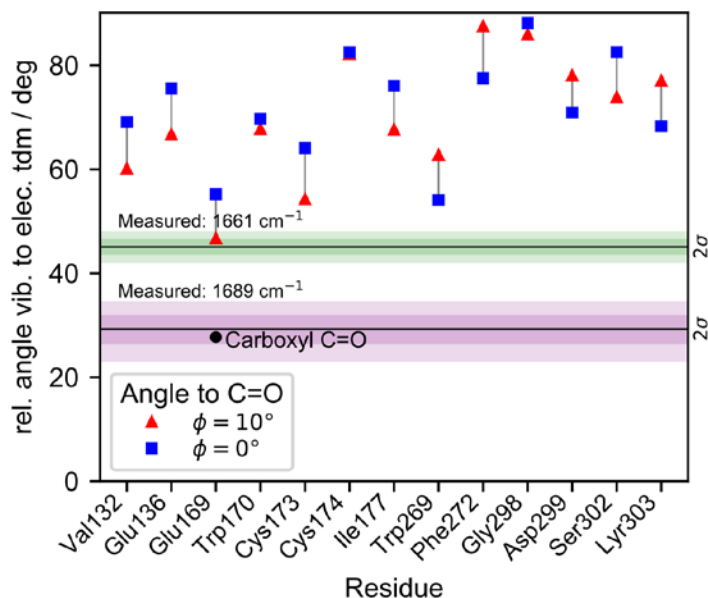

Figure S1. Estimated angles between electronic and vibrational tdm for all amide I vibrations and the carboxylic C=O stretching vibrations in a 6 Å distance of the retinal C<sub>14</sub> atom given by the homology model. For amide I tdm the estimated angles for 0° (blue squares) and 10° (red triangles) rotation away from the C=O bond in the N-C-O plane are shown. The black circle marks the angle of the one C=O stretching of a carboxyl group in the given volume, the Glu169. The experiment was performed in D<sub>2</sub>O where the rotation angle is normally ~10°. The black horizontal lines mark the best fit values of the 1661 cm<sup>-1</sup> and 1689 cm<sup>-1</sup> band, with the purple and green shaded ranges marking the 1σ- and 2σ-ranges.

|        |    |        |    |        |    |        |    |        |    |        |    |
|--------|----|--------|----|--------|----|--------|----|--------|----|--------|----|
| Hse89  | 87 | Val130 | 79 | Tyr167 | 82 | Ile203 | 83 | Leu237 | 65 | Gly279 | 15 |
| Glu94  | 72 | Tyr131 | 90 | Ser168 | 84 | Ala204 | 50 | Ala238 | 24 | Gln280 | 34 |
| Ala95  | 68 | Val132 | 60 | Glu169 | 47 | Thr205 | 48 | Ala239 | 45 | Ser281 | 45 |
| Thr96  | 36 | Cys133 | 80 | Trp170 | 68 | Ile206 | 73 | Lys240 | 71 | Gly282 | 70 |
| Phe97  | 54 | Cys134 | 70 | Leu171 | 82 | Val207 | 86 | Val241 | 47 | Phe283 | 52 |
| Ala98  | 78 | Ile135 | 78 | Leu172 | 68 | Phe208 | 46 | Leu242 | 28 | Lys284 | 84 |
| Hse99  | 55 | Glu136 | 67 | Cys173 | 54 | Gly209 | 67 | Ile243 | 60 | Lys285 | 78 |
| Val100 | 28 | Leu137 | 82 | Cys174 | 82 | Ile210 | 89 | Ser245 | 25 | Ile286 | 54 |
| Cys101 | 66 | Val138 | 82 | Pro175 | 80 | Thr211 | 69 | Leu257 | 72 | Ser287 | 78 |
| Gln102 | 77 | Phe139 | 61 | Val176 | 65 | Ala212 | 46 | Val258 | 58 | Pro288 | 74 |
| Trp103 | 42 | Ile140 | 62 | Ile177 | 68 | Ala213 | 78 | Lys259 | 29 | Tyr289 | 42 |
| Ser104 | 28 | Cys141 | 84 | Leu178 | 72 | Met214 | 85 | Ala260 | 63 | Ala290 | 66 |
| Ile105 | 79 | Phe142 | 80 | Ile179 | 88 | Leu215 | 44 | Met261 | 76 | Asp291 | 87 |
| Phe106 | 68 | Glu143 | 52 | Hse180 | 58 | Lys220 | 40 | Ala262 | 49 | Val292 | 60 |
| Ala107 | 36 | Leu144 | 69 | Leu181 | 88 | Ile221 | 62 | Ile263 | 35 | Ile293 | 38 |
| Val108 | 57 | Tyr145 | 88 | Ser182 | 69 | Ile222 | 89 | Thr264 | 73 | Ala294 | 71 |
| Cys109 | 82 | Hse146 | 60 | Asn183 | 31 | Phe223 | 60 | Tyr265 | 78 | Ser295 | 83 |
| Ile110 | 62 | Glu147 | 50 | Val184 | 46 | Tyr224 | 40 | Tyr266 | 41 | Ser296 | 48 |
| Leu111 | 35 | Phe148 | 24 | Thr185 | 23 | Leu225 | 75 | Val267 | 41 | Phe297 | 47 |
| Ser112 | 69 | Asp149 | 79 | Gly186 | 60 | Leu226 | 84 | Gly268 | 71 | Gly298 | 86 |
| Leu113 | 81 | Pro151 | 40 | Tyr191 | 84 | Gly227 | 42 | Trp269 | 63 | Asp299 | 78 |
| Leu114 | 49 | Cys152 | 70 | Arg194 | 54 | Phe228 | 60 | Ser270 | 19 | Leu300 | 39 |
| Trp115 | 44 | Ser153 | 63 | Thr195 | 88 | Thr229 | 85 | Phe271 | 60 | Ile301 | 61 |
| Tyr116 | 86 | Leu154 | 68 | Met196 | 90 | Met230 | 62 | Phe272 | 87 | Ser302 | 74 |
| Ala117 | 73 | Ile161 | 79 | Gly197 | 51 | Cys231 | 31 | Pro273 | 45 | Asn304 | 26 |
| Cys125 | 69 | Val162 | 65 | Leu198 | 70 | Cys232 | 70 | Leu274 | 41 | Met305 | 41 |
| Gly126 | 69 | Asn163 | 86 | Leu199 | 84 | Tyr233 | 76 | Ile275 | 84 | Phe306 | 83 |
| Trp127 | 82 | Trp164 | 86 | Val200 | 75 | Thr234 | 49 | Phe276 | 87 | Gly307 | 65 |
| Glu128 | 62 | Leu165 | 55 | Ser201 | 49 | Phe235 | 47 | Leu277 | 51 | Leu308 | 35 |
| Glu129 | 74 | Arg166 | 60 | Asp202 | 83 | Tyr236 | 72 | Phe278 | 72 | Leu309 | 63 |
|        |    |        |    |        |    |        |    |        |    | Gly310 | 90 |
|        |    |        |    |        |    |        |    |        |    | Hse311 | 63 |
|        |    |        |    |        |    |        |    |        |    | Phe312 | 42 |
|        |    |        |    |        |    |        |    |        |    | Leu313 | 76 |

Table S1. Estimated angles between electronic and vibrational tdms for all amide I C=O stretching vibrations in a 20 Å distance of the retinal C<sub>14</sub> atom given by the homology model.

### S3. References

- (1) Stensitzki, T.; Yang, Y.; Muders, V.; Schlesinger, R.; Heberle, J.; Heyne, K. Femtosecond Infrared Spectroscopy of Channelrhodopsin-1 Chromophore Isomerization. *Structural Dynamics* **2016**, 3 (4), 043208. <https://doi.org/10.1063/1.4948338>.
- (2) Stensitzki, T.; Muders, V.; Schlesinger, R.; Heberle, J.; Heyne, K. The Primary Photoreaction of Channelrhodopsin-1: Wavelength Dependent Photoreactions Induced by Ground-State Heterogeneity. *Front Mol Biosci* **2015**, 2. <https://doi.org/10.3389/fmolb.2015.00041>.

- (3) Schnedermann, C.; Muders, V.; Ehrenberg, D.; Schlesinger, R.; Kukura, P.; Heberle, J. Vibronic Dynamics of the Ultrafast All- *Trans* to 13- *Cis* Photoisomerization of Retinal in Channelrhodopsin-1. *Journal of the American Chemical Society* **2016**, *138* (14), 4757–4762. <https://doi.org/10.1021/jacs.5b12251>.
- (4) Muders, V.; Kerruth, S.; Lórenz-Fonfría, V. A.; Bamann, C.; Heberle, J.; Schlesinger, R. Resonance Raman and FTIR Spectroscopic Characterization of the Closed and Open States of Channelrhodopsin-1. *FEBS Letters* **2014**, *588* (14), 2301–2306. <https://doi.org/10.1016/j.febslet.2014.05.019>.
- (5) Ogren, J. I.; Mamaev, S.; Russano, D.; Li, H.; Spudich, J. L.; Rothschild, K. J. Retinal Chromophore Structure and Schiff Base Interactions in Red-Shifted Channelrhodopsin-1 from *Chlamydomonas Augustae*. *Biochemistry* **2014**, *53* (24), 3961–3970. <https://doi.org/10.1021/bi500445c>.
- (6) Nabedryk, E.; Tiede, D. M.; Dutton, P. L.; Breton, J. Conformation and Orientation of the Protein in the Bacterial Photosynthetic Reaction Center. *Biochimica et Biophysica Acta (BBA) - Bioenergetics* **1982**, *682* (2), 273–280. [https://doi.org/10.1016/0005-2728\(82\)90108-6](https://doi.org/10.1016/0005-2728(82)90108-6).
- (7) Earnest, T. N.; Herzfeld, J.; Rothschild, K. J. Polarized Fourier Transform Infrared Spectroscopy of Bacteriorhodopsin. Transmembrane Alpha Helices Are Resistant to Hydrogen/Deuterium Exchange. *Biophys J* **1990**, *58* (6), 1539–1546.
- (8) Huerta-Viga, A.; Amirjalayer, S.; Domingos, S. R.; Meuzelaar, H.; Rupenyan, A.; Woutersen, S. The Structure of Salt Bridges between Arg+ and Glu– in Peptides Investigated with 2D-IR Spectroscopy: Evidence for Two Distinct Hydrogen-Bond Geometries. *J. Chem. Phys.* **2015**, *142* (21), 212444. <https://doi.org/10.1063/1.4921064>.
- (9) Meuzelaar, H.; Vreede, J.; Woutersen, S. Influence of Glu/Arg, Asp/Arg, and Glu/Lys Salt Bridges on  $\alpha$ -Helical Stability and Folding Kinetics. *Biophysical Journal* **2016**, *110* (11), 2328–2341. <https://doi.org/10.1016/j.bpj.2016.04.015>.
- (10) Neumann-Verhoeven, M.-K.; Neumann, K.; Bamann, C.; Radu, I.; Heberle, J.; Bamberg, E.; Wachtveitl, J. Ultrafast Infrared Spectroscopy on Channelrhodopsin-2 Reveals Efficient Energy Transfer from the Retinal Chromophore to the Protein. *J. Am. Chem. Soc.* **2013**, *135* (18), 6968–6976. <https://doi.org/10.1021/ja400554y>.
- (11) Qasim, L.N.; Kurnosov, A.; Yue, Y.; Lin, Z.; Burin, A.L.; Rubtsov, I.V. Energy Transport in PEG Oligomers: Contributions of Different Optical Bands. *J. Phys. Chem. C* **2016**, *120*, 26663–26667.
