# Supplementary material for: Ultrafast Backbone Protonation in Channelrhodopsin-1 Captured by Polarization Resolved Fs Vis-pump—IR-Probe Spectroscopy and Computational Methods
Source: Molecules. 2020 Feb 14;25(4):848. doi: 10.3390/molecules25040848 (PMC7070883; doi:10.3390/molecules25040848)
Supplement: Supplementary file 1 [file molecules-25-00848-s001.zip › Homology model CaChr1.pdb]

CRYST1    0.000    0.000    0.000  90.00  90.00  90.00 P 1           1
ATOM      1  N   ALA M   1      70.361  72.554  39.343  0.00  0.00      MON1  
ATOM      2  HT1 ALA M   1      71.179  71.905  39.290  0.00  0.00      MON1  
ATOM      3  HT2 ALA M   1      70.484  73.309  38.637  0.00  0.00      MON1  
ATOM      4  HT3 ALA M   1      69.501  72.006  39.123  0.00  0.00      MON1  
ATOM      5  CA  ALA M   1      70.277  73.142  40.706  0.00  0.00      MON1  
ATOM      6  HA  ALA M   1      71.223  73.617  40.936  0.00  0.00      MON1  
ATOM      7  CB  ALA M   1      69.122  74.163  40.766  0.00  0.00      MON1  
ATOM      8  HB1 ALA M   1      68.140  73.720  40.487  0.00  0.00      MON1  
ATOM      9  HB2 ALA M   1      69.316  75.017  40.080  0.00  0.00      MON1  
ATOM     10  HB3 ALA M   1      69.026  74.591  41.789  0.00  0.00      MON1  
ATOM     11  C   ALA M   1      70.050  72.077  41.729  0.00  0.00      MON1  
ATOM     12  O   ALA M   1      70.878  71.862  42.609  0.00  0.00      MON1  
ATOM     13  N   GLY M   2      68.891  71.393  41.626  0.00  0.00      MON1  
ATOM     14  HN  GLY M   2      68.195  71.567  40.924  0.00  0.00      MON1  
ATOM     15  CA  GLY M   2      68.546  70.343  42.540  0.00  0.00      MON1  
ATOM     16  HA1 GLY M   2      67.479  70.191  42.458  0.00  0.00      MON1  
ATOM     17  HA2 GLY M   2      68.841  70.672  43.523  0.00  0.00      MON1  
ATOM     18  C   GLY M   2      69.198  69.052  42.130  0.00  0.00      MON1  
ATOM     19  O   GLY M   2      69.684  68.905  41.006  0.00  0.00      MON1  
ATOM     20  N   PRO M   3      69.158  68.081  43.017  0.00  0.00      MON1  
ATOM     21  CD  PRO M   3      69.272  68.347  44.449  0.00  0.00      MON1  
ATOM     22  HD1 PRO M   3      68.259  68.337  44.862  0.00  0.00      MON1  
ATOM     23  HD2 PRO M   3      69.721  69.315  44.714  0.00  0.00      MON1  
ATOM     24  CA  PRO M   3      69.608  66.742  42.698  0.00  0.00      MON1  
ATOM     25  HA  PRO M   3      70.575  66.825  42.226  0.00  0.00      MON1  
ATOM     26  CB  PRO M   3      69.673  66.038  44.058  0.00  0.00      MON1  
ATOM     27  HB1 PRO M   3      70.371  65.182  44.064  0.00  0.00      MON1  
ATOM     28  HB2 PRO M   3      68.665  65.662  44.348  0.00  0.00      MON1  
ATOM     29  CG  PRO M   3      70.046  67.168  45.022  0.00  0.00      MON1  
ATOM     30  HG1 PRO M   3      69.787  66.945  46.075  0.00  0.00      MON1  
ATOM     31  HG2 PRO M   3      71.137  67.379  44.950  0.00  0.00      MON1  
ATOM     32  C   PRO M   3      68.678  66.055  41.732  0.00  0.00      MON1  
ATOM     33  O   PRO M   3      69.091  65.102  41.080  0.00  0.00      MON1  
ATOM     34  N   VAL M   4      67.414  66.500  41.663  0.00  0.00      MON1  
ATOM     35  HN  VAL M   4      67.135  67.296  42.186  0.00  0.00      MON1  
ATOM     36  CA  VAL M   4      66.446  65.988  40.717  0.00  0.00      MON1  
ATOM     37  HA  VAL M   4      66.556  64.915  40.632  0.00  0.00      MON1  
ATOM     38  CB  VAL M   4      65.028  66.351  41.043  0.00  0.00      MON1  
ATOM     39  HB  VAL M   4      64.309  65.880  40.328  0.00  0.00      MON1  
ATOM     40  CG1 VAL M   4      64.796  65.845  42.373  0.00  0.00      MON1  
ATOM     41 HG11 VAL M   4      65.422  66.376  43.123  0.00  0.00      MON1  
ATOM     42 HG12 VAL M   4      65.004  64.751  42.328  0.00  0.00      MON1  
ATOM     43 HG13 VAL M   4      63.737  66.067  42.633  0.00  0.00      MON1  
ATOM     44  CG2 VAL M   4      64.775  67.850  41.111  0.00  0.00      MON1  
ATOM     45 HG21 VAL M   4      64.831  68.334  40.112  0.00  0.00      MON1  
ATOM     46 HG22 VAL M   4      65.490  68.370  41.781  0.00  0.00      MON1  
ATOM     47 HG23 VAL M   4      63.757  68.043  41.512  0.00  0.00      MON1  
ATOM     48  C   VAL M   4      66.663  66.580  39.376  0.00  0.00      MON1  
ATOM     49  O   VAL M   4      67.437  67.523  39.221  0.00  0.00      MON1  
ATOM     50  N   ASP M   5      65.960  66.047  38.362  0.00  0.00      MON1  
ATOM     51  HN  ASP M   5      65.392  65.226  38.463  0.00  0.00      MON1  
ATOM     52  CA  ASP M   5      66.069  66.585  37.039  0.00  0.00      MON1  
ATOM     53  HA  ASP M   5      67.127  66.759  36.873  0.00  0.00      MON1  
ATOM     54  CB  ASP M   5      65.617  65.607  35.946  0.00  0.00      MON1  
ATOM     55  HB1 ASP M   5      64.536  65.497  35.863  0.00  0.00      MON1  
ATOM     56  HB2 ASP M   5      66.053  64.607  36.146  0.00  0.00      MON1  
ATOM     57  CG  ASP M   5      66.153  66.068  34.601  0.00  0.00      MON1  
ATOM     58  OD1 ASP M   5      66.620  67.237  34.482  0.00  0.00      MON1  
ATOM     59  OD2 ASP M   5      66.114  65.243  33.664  0.00  0.00      MON1  
ATOM     60  C   ASP M   5      65.367  67.927  36.942  0.00  0.00      MON1  
ATOM     61  O   ASP M   5      64.162  68.078  37.114  0.00  0.00      MON1  
ATOM     62  N   ASN M   6      66.183  68.954  36.709  0.00  0.00      MON1  
ATOM     63  HN  ASN M   6      67.131  68.712  36.535  0.00  0.00      MON1  
ATOM     64  CA  ASN M   6      65.798  70.331  36.566  0.00  0.00      MON1  
ATOM     65  HA  ASN M   6      65.005  70.559  37.270  0.00  0.00      MON1  
ATOM     66  CB  ASN M   6      67.028  71.236  36.796  0.00  0.00      MON1  
ATOM     67  HB1 ASN M   6      66.712  72.299  36.830  0.00  0.00      MON1  
ATOM     68  HB2 ASN M   6      67.782  71.108  35.990  0.00  0.00      MON1  
ATOM     69  CG  ASN M   6      67.622  70.874  38.142  0.00  0.00      MON1  
ATOM     70  OD1 ASN M   6      67.038  71.104  39.199  0.00  0.00      MON1  
ATOM     71  ND2 ASN M   6      68.852  70.305  38.141  0.00  0.00      MON1  
ATOM     72 HD21 ASN M   6      69.044  69.722  38.940  0.00  0.00      MON1  
ATOM     73 HD22 ASN M   6      69.267  70.060  37.267  0.00  0.00      MON1  
ATOM     74  C   ASN M   6      65.305  70.645  35.178  0.00  0.00      MON1  
ATOM     75  O   ASN M   6      64.379  71.437  35.000  0.00  0.00      MON1  
ATOM     76  N   SER M   7      65.917  70.044  34.146  0.00  0.00      MON1  
ATOM     77  HN  SER M   7      66.433  69.184  34.265  0.00  0.00      MON1  
ATOM     78  CA  SER M   7      65.634  70.480  32.796  0.00  0.00      MON1  
ATOM     79  HA  SER M   7      65.064  71.398  32.807  0.00  0.00      MON1  
ATOM     80  CB  SER M   7      66.846  70.752  31.885  0.00  0.00      MON1  
ATOM     81  HB1 SER M   7      66.496  71.122  30.893  0.00  0.00      MON1  
ATOM     82  HB2 SER M   7      67.443  69.864  31.674  0.00  0.00      MON1  
ATOM     83  OG  SER M   7      67.671  71.769  32.440  0.00  0.00      MON1  
ATOM     84  HG1 SER M   7      67.155  72.585  32.457  0.00  0.00      MON1  
ATOM     85  C   SER M   7      64.801  69.460  32.117  0.00  0.00      MON1  
ATOM     86  O   SER M   7      65.027  68.264  32.232  0.00  0.00      MON1  
ATOM     87  N   ILE M   8      63.803  69.928  31.362  0.00  0.00      MON1  
ATOM     88  HN  ILE M   8      63.601  70.899  31.278  0.00  0.00      MON1  
ATOM     89  CA  ILE M   8      62.921  69.051  30.644  0.00  0.00      MON1  
ATOM     90  HA  ILE M   8      63.450  68.156  30.343  0.00  0.00      MON1  
ATOM     91  CB  ILE M   8      61.660  68.695  31.402  0.00  0.00      MON1  
ATOM     92  HB  ILE M   8      61.052  67.979  30.798  0.00  0.00      MON1  
ATOM     93  CG2 ILE M   8      62.079  67.988  32.690  0.00  0.00      MON1  
ATOM     94 HG21 ILE M   8      62.239  68.729  33.500  0.00  0.00      MON1  
ATOM     95 HG22 ILE M   8      63.008  67.410  32.607  0.00  0.00      MON1  
ATOM     96 HG23 ILE M   8      61.301  67.256  32.962  0.00  0.00      MON1  
ATOM     97  CG1 ILE M   8      60.805  69.948  31.708  0.00  0.00      MON1  
ATOM     98 HG11 ILE M   8      60.619  70.588  30.820  0.00  0.00      MON1  
ATOM     99 HG12 ILE M   8      61.380  70.569  32.435  0.00  0.00      MON1  
ATOM    100  CD  ILE M   8      59.442  69.659  32.298  0.00  0.00      MON1  
ATOM    101  HD1 ILE M   8      59.385  68.633  32.660  0.00  0.00      MON1  
ATOM    102  HD2 ILE M   8      58.665  69.735  31.504  0.00  0.00      MON1  
ATOM    103  HD3 ILE M   8      59.167  70.397  33.081  0.00  0.00      MON1  
ATOM    104  C   ILE M   8      62.496  69.766  29.410  0.00  0.00      MON1  
ATOM    105  O   ILE M   8      62.557  70.993  29.328  0.00  0.00      MON1  
ATOM    106  N   VAL M   9      62.042  69.002  28.419  0.00  0.00      MON1  
ATOM    107  HN  VAL M   9      62.006  68.005  28.495  0.00  0.00      MON1  
ATOM    108  CA  VAL M   9      61.508  69.591  27.226  0.00  0.00      MON1  
ATOM    109  HA  VAL M   9      61.428  70.667  27.307  0.00  0.00      MON1  
ATOM    110  CB  VAL M   9      62.312  69.246  26.012  0.00  0.00      MON1  
ATOM    111  HB  VAL M   9      62.276  68.147  25.884  0.00  0.00      MON1  
ATOM    112  CG1 VAL M   9      61.659  69.873  24.774  0.00  0.00      MON1  
ATOM    113 HG11 VAL M   9      61.695  70.979  24.803  0.00  0.00      MON1  
ATOM    114 HG12 VAL M   9      60.618  69.537  24.598  0.00  0.00      MON1  
ATOM    115 HG13 VAL M   9      62.227  69.482  23.922  0.00  0.00      MON1  
ATOM    116  CG2 VAL M   9      63.773  69.706  26.205  0.00  0.00      MON1  
ATOM    117 HG21 VAL M   9      64.264  69.153  27.032  0.00  0.00      MON1  
ATOM    118 HG22 VAL M   9      63.814  70.787  26.431  0.00  0.00      MON1  
ATOM    119 HG23 VAL M   9      64.356  69.518  25.282  0.00  0.00      MON1  
ATOM    120  C   VAL M   9      60.133  69.035  27.056  0.00  0.00      MON1  
ATOM    121  O   VAL M   9      59.908  67.830  27.185  0.00  0.00      MON1  
ATOM    122  N   ILE M  10      59.167  69.907  26.761  0.00  0.00      MON1  
ATOM    123  HN  ILE M  10      59.336  70.882  26.675  0.00  0.00      MON1  
ATOM    124  CA  ILE M  10      57.826  69.461  26.509  0.00  0.00      MON1  
ATOM    125  HA  ILE M  10      57.664  68.482  26.936  0.00  0.00      MON1  
ATOM    126  CB  ILE M  10      56.782  70.374  27.109  0.00  0.00      MON1  
ATOM    127  HB  ILE M  10      55.762  69.980  26.885  0.00  0.00      MON1  
ATOM    128  CG2 ILE M  10      56.983  70.326  28.642  0.00  0.00      MON1  
ATOM    129 HG21 ILE M  10      57.922  70.836  28.941  0.00  0.00      MON1  
ATOM    130 HG22 ILE M  10      57.016  69.277  29.003  0.00  0.00      MON1  
ATOM    131 HG23 ILE M  10      56.138  70.833  29.155  0.00  0.00      MON1  
ATOM    132  CG1 ILE M  10      56.879  71.807  26.537  0.00  0.00      MON1  
ATOM    133 HG11 ILE M  10      56.723  71.836  25.439  0.00  0.00      MON1  
ATOM    134 HG12 ILE M  10      57.891  72.214  26.747  0.00  0.00      MON1  
ATOM    135  CD  ILE M  10      55.844  72.782  27.078  0.00  0.00      MON1  
ATOM    136  HD1 ILE M  10      55.705  72.684  28.175  0.00  0.00      MON1  
ATOM    137  HD2 ILE M  10      54.867  72.607  26.579  0.00  0.00      MON1  
ATOM    138  HD3 ILE M  10      56.142  73.827  26.852  0.00  0.00      MON1  
ATOM    139  C   ILE M  10      57.685  69.340  25.021  0.00  0.00      MON1  
ATOM    140  O   ILE M  10      57.809  70.292  24.253  0.00  0.00      MON1  
ATOM    141  N   GLY M  11      57.499  68.102  24.563  0.00  0.00      MON1  
ATOM    142  HN  GLY M  11      57.320  67.364  25.218  0.00  0.00      MON1  
ATOM    143  CA  GLY M  11      57.359  67.819  23.159  0.00  0.00      MON1  
ATOM    144  HA1 GLY M  11      57.670  66.799  23.004  0.00  0.00      MON1  
ATOM    145  HA2 GLY M  11      57.914  68.530  22.561  0.00  0.00      MON1  
ATOM    146  C   GLY M  11      55.923  67.909  22.801  0.00  0.00      MON1  
ATOM    147  O   GLY M  11      55.042  67.927  23.664  0.00  0.00      MON1  
ATOM    148  N   GLY M  12      55.632  67.913  21.486  0.00  0.00      MON1  
ATOM    149  HN  GLY M  12      56.358  67.897  20.800  0.00  0.00      MON1  
ATOM    150  CA  GLY M  12      54.282  68.118  20.997  0.00  0.00      MON1  
ATOM    151  HA1 GLY M  12      53.650  67.312  21.284  0.00  0.00      MON1  
ATOM    152  HA2 GLY M  12      54.327  68.274  19.932  0.00  0.00      MON1  
ATOM    153  C   GLY M  12      53.716  69.359  21.580  0.00  0.00      MON1  
ATOM    154  O   GLY M  12      54.451  70.287  21.900  0.00  0.00      MON1  
ATOM    155  N   ILE M  13      52.403  69.420  21.764  0.00  0.00      MON1  
ATOM    156  HN  ILE M  13      51.776  68.701  21.488  0.00  0.00      MON1  
ATOM    157  CA  ILE M  13      51.860  70.554  22.460  0.00  0.00      MON1  
ATOM    158  HA  ILE M  13      52.557  71.382  22.499  0.00  0.00      MON1  
ATOM    159  CB  ILE M  13      50.611  71.092  21.810  0.00  0.00      MON1  
ATOM    160  HB  ILE M  13      50.266  71.934  22.416  0.00  0.00      MON1  
ATOM    161  CG2 ILE M  13      51.047  71.673  20.450  0.00  0.00      MON1  
ATOM    162 HG21 ILE M  13      51.218  70.850  19.723  0.00  0.00      MON1  
ATOM    163 HG22 ILE M  13      52.003  72.223  20.558  0.00  0.00      MON1  
ATOM    164 HG23 ILE M  13      50.273  72.348  20.031  0.00  0.00      MON1  
ATOM    165  CG1 ILE M  13      49.471  70.057  21.653  0.00  0.00      MON1  
ATOM    166 HG11 ILE M  13      49.180  69.513  22.567  0.00  0.00      MON1  
ATOM    167 HG12 ILE M  13      49.823  69.284  20.931  0.00  0.00      MON1  
ATOM    168  CD  ILE M  13      48.182  70.651  21.089  0.00  0.00      MON1  
ATOM    169  HD1 ILE M  13      48.372  71.308  20.215  0.00  0.00      MON1  
ATOM    170  HD2 ILE M  13      47.647  71.243  21.861  0.00  0.00      MON1  
ATOM    171  HD3 ILE M  13      47.503  69.843  20.742  0.00  0.00      MON1  
ATOM    172  C   ILE M  13      51.634  70.143  23.871  0.00  0.00      MON1  
ATOM    173  O   ILE M  13      50.519  69.837  24.288  0.00  0.00      MON1  
ATOM    174  N   ASP M  14      52.721  70.068  24.657  0.00  0.00      MON1  
ATOM    175  HN  ASP M  14      53.629  70.279  24.300  0.00  0.00      MON1  
ATOM    176  CA  ASP M  14      52.631  69.495  25.974  0.00  0.00      MON1  
ATOM    177  HA  ASP M  14      53.629  69.464  26.389  0.00  0.00      MON1  
ATOM    178  CB  ASP M  14      51.677  70.287  26.905  0.00  0.00      MON1  
ATOM    179  HB1 ASP M  14      51.540  69.763  27.875  0.00  0.00      MON1  
ATOM    180  HB2 ASP M  14      50.687  70.475  26.459  0.00  0.00      MON1  
ATOM    181  CG  ASP M  14      52.280  71.611  27.275  0.00  0.00      MON1  
ATOM    182  OD1 ASP M  14      53.340  71.551  27.940  0.00  0.00      MON1  
ATOM    183  OD2 ASP M  14      51.665  72.672  26.983  0.00  0.00      MON1  
ATOM    184  C   ASP M  14      52.145  68.071  25.884  0.00  0.00      MON1  
ATOM    185  O   ASP M  14      51.907  67.504  24.812  0.00  0.00      MON1  
ATOM    186  N   GLY M  15      52.005  67.408  27.029  0.00  0.00      MON1  
ATOM    187  HN  GLY M  15      52.255  67.812  27.907  0.00  0.00      MON1  
ATOM    188  CA  GLY M  15      51.477  66.067  26.992  0.00  0.00      MON1  
ATOM    189  HA1 GLY M  15      50.789  65.943  26.168  0.00  0.00      MON1  
ATOM    190  HA2 GLY M  15      51.037  65.816  27.927  0.00  0.00      MON1  
ATOM    191  C   GLY M  15      52.554  65.075  26.831  0.00  0.00      MON1  
ATOM    192  O   GLY M  15      52.398  63.920  27.210  0.00  0.00      MON1  
ATOM    193  N   TRP M  16      53.700  65.486  26.281  0.00  0.00      MON1  
ATOM    194  HN  TRP M  16      53.814  66.424  25.963  0.00  0.00      MON1  
ATOM    195  CA  TRP M  16      54.821  64.605  26.219  0.00  0.00      MON1  
ATOM    196  HA  TRP M  16      54.656  63.732  26.840  0.00  0.00      MON1  
ATOM    197  CB  TRP M  16      55.145  64.143  24.790  0.00  0.00      MON1  
ATOM    198  HB1 TRP M  16      55.520  64.988  24.174  0.00  0.00      MON1  
ATOM    199  HB2 TRP M  16      54.186  63.786  24.351  0.00  0.00      MON1  
ATOM    200  CG  TRP M  16      56.111  63.003  24.733  0.00  0.00      MON1  
ATOM    201  CD1 TRP M  16      56.895  62.462  25.720  0.00  0.00      MON1  
ATOM    202  HD1 TRP M  16      56.812  62.599  26.783  0.00  0.00      MON1  
ATOM    203  NE1 TRP M  16      57.602  61.414  25.232  0.00  0.00      MON1  
ATOM    204  HE1 TRP M  16      58.257  60.869  25.710  0.00  0.00      MON1  
ATOM    205  CE2 TRP M  16      57.259  61.197  23.946  0.00  0.00      MON1  
ATOM    206  CD2 TRP M  16      56.314  62.183  23.585  0.00  0.00      MON1  
ATOM    207  CE3 TRP M  16      55.765  62.189  22.309  0.00  0.00      MON1  
ATOM    208  HE3 TRP M  16      55.014  62.913  22.025  0.00  0.00      MON1  
ATOM    209  CZ3 TRP M  16      56.181  61.209  21.413  0.00  0.00      MON1  
ATOM    210  HZ3 TRP M  16      55.747  61.165  20.422  0.00  0.00      MON1  
ATOM    211  CZ2 TRP M  16      57.661  60.219  23.063  0.00  0.00      MON1  
ATOM    212  HZ2 TRP M  16      58.382  59.462  23.336  0.00  0.00      MON1  
ATOM    213  CH2 TRP M  16      57.109  60.241  21.784  0.00  0.00      MON1  
ATOM    214  HH2 TRP M  16      57.404  59.484  21.067  0.00  0.00      MON1  
ATOM    215  C   TRP M  16      55.973  65.347  26.812  0.00  0.00      MON1  
ATOM    216  O   TRP M  16      56.248  66.491  26.473  0.00  0.00      MON1  
ATOM    217  N   ILE M  17      56.661  64.712  27.755  0.00  0.00      MON1  
ATOM    218  HN  ILE M  17      56.383  63.814  28.090  0.00  0.00      MON1  
ATOM    219  CA  ILE M  17      57.817  65.248  28.393  0.00  0.00      MON1  
ATOM    220  HA  ILE M  17      58.044  66.235  28.013  0.00  0.00      MON1  
ATOM    221  CB  ILE M  17      57.554  65.327  29.875  0.00  0.00      MON1  
ATOM    222  HB  ILE M  17      56.581  65.820  30.044  0.00  0.00      MON1  
ATOM    223  CG2 ILE M  17      57.432  63.921  30.502  0.00  0.00      MON1  
ATOM    224 HG21 ILE M  17      58.425  63.436  30.612  0.00  0.00      MON1  
ATOM    225 HG22 ILE M  17      56.777  63.256  29.907  0.00  0.00      MON1  
ATOM    226 HG23 ILE M  17      56.977  63.978  31.513  0.00  0.00      MON1  
ATOM    227  CG1 ILE M  17      58.608  66.205  30.537  0.00  0.00      MON1  
ATOM    228 HG11 ILE M  17      58.646  67.207  30.049  0.00  0.00      MON1  
ATOM    229 HG12 ILE M  17      59.611  65.734  30.405  0.00  0.00      MON1  
ATOM    230  CD  ILE M  17      58.348  66.365  32.007  0.00  0.00      MON1  
ATOM    231  HD1 ILE M  17      58.145  65.404  32.519  0.00  0.00      MON1  
ATOM    232  HD2 ILE M  17      57.527  67.083  32.217  0.00  0.00      MON1  
ATOM    233  HD3 ILE M  17      59.301  66.756  32.401  0.00  0.00      MON1  
ATOM    234  C   ILE M  17      58.997  64.355  28.102  0.00  0.00      MON1  
ATOM    235  O   ILE M  17      58.934  63.130  28.208  0.00  0.00      MON1  
ATOM    236  N   ALA M  18      60.119  64.945  27.690  0.00  0.00      MON1  
ATOM    237  HN  ALA M  18      60.174  65.938  27.549  0.00  0.00      MON1  
ATOM    238  CA  ALA M  18      61.315  64.176  27.476  0.00  0.00      MON1  
ATOM    239  HA  ALA M  18      61.176  63.126  27.705  0.00  0.00      MON1  
ATOM    240  CB  ALA M  18      61.795  64.315  26.032  0.00  0.00      MON1  
ATOM    241  HB1 ALA M  18      61.664  65.369  25.701  0.00  0.00      MON1  
ATOM    242  HB2 ALA M  18      61.178  63.681  25.358  0.00  0.00      MON1  
ATOM    243  HB3 ALA M  18      62.861  64.064  25.910  0.00  0.00      MON1  
ATOM    244  C   ALA M  18      62.378  64.677  28.397  0.00  0.00      MON1  
ATOM    245  O   ALA M  18      62.505  65.883  28.625  0.00  0.00      MON1  
ATOM    246  N   ILE M  19      63.172  63.746  28.943  0.00  0.00      MON1  
ATOM    247  HN  ILE M  19      63.054  62.766  28.790  0.00  0.00      MON1  
ATOM    248  CA  ILE M  19      64.252  64.116  29.818  0.00  0.00      MON1  
ATOM    249  HA  ILE M  19      64.558  65.113  29.543  0.00  0.00      MON1  
ATOM    250  CB  ILE M  19      63.882  64.087  31.288  0.00  0.00      MON1  
ATOM    251  HB  ILE M  19      64.740  64.366  31.940  0.00  0.00      MON1  
ATOM    252  CG2 ILE M  19      62.811  65.148  31.525  0.00  0.00      MON1  
ATOM    253 HG21 ILE M  19      61.831  64.845  31.104  0.00  0.00      MON1  
ATOM    254 HG22 ILE M  19      63.131  66.100  31.057  0.00  0.00      MON1  
ATOM    255 HG23 ILE M  19      62.683  65.306  32.618  0.00  0.00      MON1  
ATOM    256  CG1 ILE M  19      63.453  62.682  31.739  0.00  0.00      MON1  
ATOM    257 HG11 ILE M  19      64.281  61.958  31.575  0.00  0.00      MON1  
ATOM    258 HG12 ILE M  19      62.577  62.340  31.143  0.00  0.00      MON1  
ATOM    259  CD  ILE M  19      63.100  62.621  33.220  0.00  0.00      MON1  
ATOM    260  HD1 ILE M  19      62.203  63.242  33.424  0.00  0.00      MON1  
ATOM    261  HD2 ILE M  19      63.954  63.006  33.824  0.00  0.00      MON1  
ATOM    262  HD3 ILE M  19      62.885  61.578  33.535  0.00  0.00      MON1  
ATOM    263  C   ILE M  19      65.403  63.169  29.609  0.00  0.00      MON1  
ATOM    264  O   ILE M  19      65.278  62.135  28.941  0.00  0.00      MON1  
ATOM    265  N   PRO M  20      66.543  63.549  30.143  0.00  0.00      MON1  
ATOM    266  CD  PRO M  20      66.876  64.963  30.322  0.00  0.00      MON1  
ATOM    267  HD1 PRO M  20      66.160  65.516  30.973  0.00  0.00      MON1  
ATOM    268  HD2 PRO M  20      66.943  65.456  29.327  0.00  0.00      MON1  
ATOM    269  CA  PRO M  20      67.715  62.698  30.220  0.00  0.00      MON1  
ATOM    270  HA  PRO M  20      67.840  62.195  29.271  0.00  0.00      MON1  
ATOM    271  CB  PRO M  20      68.881  63.664  30.501  0.00  0.00      MON1  
ATOM    272  HB1 PRO M  20      69.403  63.872  29.539  0.00  0.00      MON1  
ATOM    273  HB2 PRO M  20      69.618  63.266  31.230  0.00  0.00      MON1  
ATOM    274  CG  PRO M  20      68.233  64.959  30.996  0.00  0.00      MON1  
ATOM    275  HG1 PRO M  20      68.080  64.889  32.100  0.00  0.00      MON1  
ATOM    276  HG2 PRO M  20      68.839  65.858  30.770  0.00  0.00      MON1  
ATOM    277  C   PRO M  20      67.570  61.625  31.276  0.00  0.00      MON1  
ATOM    278  O   PRO M  20      66.822  61.789  32.236  0.00  0.00      MON1  
ATOM    279  N   ALA M  21      68.256  60.481  31.082  0.00  0.00      MON1  
ATOM    280  HN  ALA M  21      68.848  60.375  30.291  0.00  0.00      MON1  
ATOM    281  CA  ALA M  21      68.216  59.369  32.003  0.00  0.00      MON1  
ATOM    282  HA  ALA M  21      67.239  59.340  32.467  0.00  0.00      MON1  
ATOM    283  CB  ALA M  21      68.459  58.020  31.297  0.00  0.00      MON1  
ATOM    284  HB1 ALA M  21      69.470  57.989  30.836  0.00  0.00      MON1  
ATOM    285  HB2 ALA M  21      67.707  57.880  30.491  0.00  0.00      MON1  
ATOM    286  HB3 ALA M  21      68.364  57.165  32.001  0.00  0.00      MON1  
ATOM    287  C   ALA M  21      69.239  59.517  33.104  0.00  0.00      MON1  
ATOM    288  O   ALA M  21      70.254  60.201  32.974  0.00  0.00      MON1  
ATOM    289  N   GLY M  22      68.960  58.840  34.227  0.00  0.00      MON1  
ATOM    290  HN  GLY M  22      68.144  58.269  34.260  0.00  0.00      MON1  
ATOM    291  CA  GLY M  22      69.821  58.770  35.383  0.00  0.00      MON1  
ATOM    292  HA1 GLY M  22      70.835  58.915  35.103  0.00  0.00      MON1  
ATOM    293  HA2 GLY M  22      69.715  57.778  35.789  0.00  0.00      MON1  
ATOM    294  C   GLY M  22      69.372  59.680  36.483  0.00  0.00      MON1  
ATOM    295  O   GLY M  22      69.833  59.534  37.610  0.00  0.00      MON1  
ATOM    296  N   ASP M  23      68.402  60.576  36.218  0.00  0.00      MON1  
ATOM    297  HN  ASP M  23      68.085  60.752  35.292  0.00  0.00      MON1  
ATOM    298  CA  ASP M  23      67.906  61.453  37.255  0.00  0.00      MON1  
ATOM    299  HA  ASP M  23      68.340  61.199  38.216  0.00  0.00      MON1  
ATOM    300  CB  ASP M  23      68.195  62.941  36.976  0.00  0.00      MON1  
ATOM    301  HB1 ASP M  23      67.732  63.604  37.736  0.00  0.00      MON1  
ATOM    302  HB2 ASP M  23      67.824  63.230  35.969  0.00  0.00      MON1  
ATOM    303  CG  ASP M  23      69.692  63.206  37.002  0.00  0.00      MON1  
ATOM    304  OD1 ASP M  23      70.490  62.266  37.251  0.00  0.00      MON1  
ATOM    305  OD2 ASP M  23      70.087  64.384  36.796  0.00  0.00      MON1  
ATOM    306  C   ASP M  23      66.430  61.251  37.393  0.00  0.00      MON1  
ATOM    307  O   ASP M  23      65.721  60.963  36.427  0.00  0.00      MON1  
ATOM    308  N   CYS M  24      65.928  61.338  38.634  0.00  0.00      MON1  
ATOM    309  HN  CYS M  24      66.532  61.484  39.414  0.00  0.00      MON1  
ATOM    310  CA  CYS M  24      64.511  61.287  38.881  0.00  0.00      MON1  
ATOM    311  HA  CYS M  24      64.068  60.498  38.287  0.00  0.00      MON1  
ATOM    312  CB  CYS M  24      64.187  61.088  40.369  0.00  0.00      MON1  
ATOM    313  HB1 CYS M  24      63.096  61.028  40.481  0.00  0.00      MON1  
ATOM    314  HB2 CYS M  24      64.517  61.994  40.929  0.00  0.00      MON1  
ATOM    315  SG  CYS M  24      64.943  59.691  41.213  0.00  0.00      MON1  
ATOM    316  HG1 CYS M  24      66.169  60.192  41.191  0.00  0.00      MON1  
ATOM    317  C   CYS M  24      63.909  62.606  38.470  0.00  0.00      MON1  
ATOM    318  O   CYS M  24      64.542  63.649  38.624  0.00  0.00      MON1  
ATOM    319  N   TYR M  25      62.667  62.625  37.985  0.00  0.00      MON1  
ATOM    320  HN  TYR M  25      62.126  61.780  37.886  0.00  0.00      MON1  
ATOM    321  CA  TYR M  25      62.072  63.857  37.549  0.00  0.00      MON1  
ATOM    322  HA  TYR M  25      62.584  64.699  37.996  0.00  0.00      MON1  
ATOM    323  CB  TYR M  25      62.144  63.984  36.022  0.00  0.00      MON1  
ATOM    324  HB1 TYR M  25      61.629  63.113  35.558  0.00  0.00      MON1  
ATOM    325  HB2 TYR M  25      63.196  63.980  35.677  0.00  0.00      MON1  
ATOM    326  CG  TYR M  25      61.481  65.248  35.587  0.00  0.00      MON1  
ATOM    327  CD1 TYR M  25      62.022  66.472  35.964  0.00  0.00      MON1  
ATOM    328  HD1 TYR M  25      62.915  66.416  36.537  0.00  0.00      MON1  
ATOM    329  CE1 TYR M  25      61.382  67.677  35.676  0.00  0.00      MON1  
ATOM    330  HE1 TYR M  25      61.834  68.615  35.961  0.00  0.00      MON1  
ATOM    331  CZ  TYR M  25      60.139  67.636  35.063  0.00  0.00      MON1  
ATOM    332  OH  TYR M  25      59.415  68.811  34.883  0.00  0.00      MON1  
ATOM    333  HH  TYR M  25      60.029  69.546  34.957  0.00  0.00      MON1  
ATOM    334  CD2 TYR M  25      60.249  65.214  34.948  0.00  0.00      MON1  
ATOM    335  HD2 TYR M  25      59.783  64.272  34.697  0.00  0.00      MON1  
ATOM    336  CE2 TYR M  25      59.586  66.412  34.725  0.00  0.00      MON1  
ATOM    337  HE2 TYR M  25      58.598  66.427  34.369  0.00  0.00      MON1  
ATOM    338  C   TYR M  25      60.638  63.963  37.994  0.00  0.00      MON1  
ATOM    339  O   TYR M  25      59.889  62.996  37.994  0.00  0.00      MON1  
ATOM    340  N   CYS M  26      60.220  65.174  38.384  0.00  0.00      MON1  
ATOM    341  HN  CYS M  26      60.846  65.947  38.423  0.00  0.00      MON1  
ATOM    342  CA  CYS M  26      58.842  65.444  38.645  0.00  0.00      MON1  
ATOM    343  HA  CYS M  26      58.242  64.958  37.885  0.00  0.00      MON1  
ATOM    344  CB  CYS M  26      58.422  65.023  40.047  0.00  0.00      MON1  
ATOM    345  HB1 CYS M  26      58.800  65.739  40.790  0.00  0.00      MON1  
ATOM    346  HB2 CYS M  26      58.891  64.053  40.275  0.00  0.00      MON1  
ATOM    347  SG  CYS M  26      56.639  65.118  40.172  0.00  0.00      MON1  
ATOM    348  HG1 CYS M  26      56.429  63.871  39.775  0.00  0.00      MON1  
ATOM    349  C   CYS M  26      58.618  66.923  38.562  0.00  0.00      MON1  
ATOM    350  O   CYS M  26      59.409  67.710  39.082  0.00  0.00      MON1  
ATOM    351  N   ALA M  27      57.501  67.325  37.935  0.00  0.00      MON1  
ATOM    352  HN  ALA M  27      56.917  66.679  37.452  0.00  0.00      MON1  
ATOM    353  CA  ALA M  27      57.127  68.706  37.794  0.00  0.00      MON1  
ATOM    354  HA  ALA M  27      57.963  69.233  37.350  0.00  0.00      MON1  
ATOM    355  CB  ALA M  27      55.914  68.850  36.880  0.00  0.00      MON1  
ATOM    356  HB1 ALA M  27      54.950  68.626  37.381  0.00  0.00      MON1  
ATOM    357  HB2 ALA M  27      56.016  68.196  35.992  0.00  0.00      MON1  
ATOM    358  HB3 ALA M  27      55.914  69.886  36.486  0.00  0.00      MON1  
ATOM    359  C   ALA M  27      56.816  69.368  39.106  0.00  0.00      MON1  
ATOM    360  O   ALA M  27      57.150  70.515  39.339  0.00  0.00      MON1  
ATOM    361  N   GLY M  28      56.168  68.641  40.035  0.00  0.00      MON1  
ATOM    362  HN  GLY M  28      55.879  67.713  39.813  0.00  0.00      MON1  
ATOM    363  CA  GLY M  28      55.761  69.196  41.318  0.00  0.00      MON1  
ATOM    364  HA1 GLY M  28      55.259  68.426  41.877  0.00  0.00      MON1  
ATOM    365  HA2 GLY M  28      55.138  70.061  41.135  0.00  0.00      MON1  
ATOM    366  C   GLY M  28      56.922  69.654  42.143  0.00  0.00      MON1  
ATOM    367  O   GLY M  28      56.821  70.598  42.916  0.00  0.00      MON1  
ATOM    368  N   TRP M  29      58.079  68.993  41.973  0.00  0.00      MON1  
ATOM    369  HN  TRP M  29      58.135  68.247  41.317  0.00  0.00      MON1  
ATOM    370  CA  TRP M  29      59.307  69.329  42.660  0.00  0.00      MON1  
ATOM    371  HA  TRP M  29      59.114  69.356  43.723  0.00  0.00      MON1  
ATOM    372  CB  TRP M  29      60.415  68.303  42.339  0.00  0.00      MON1  
ATOM    373  HB1 TRP M  29      61.358  68.588  42.860  0.00  0.00      MON1  
ATOM    374  HB2 TRP M  29      60.622  68.321  41.246  0.00  0.00      MON1  
ATOM    375  CG  TRP M  29      60.082  66.904  42.733  0.00  0.00      MON1  
ATOM    376  CD1 TRP M  29      59.138  66.459  43.621  0.00  0.00      MON1  
ATOM    377  HD1 TRP M  29      58.478  67.097  44.199  0.00  0.00      MON1  
ATOM    378  NE1 TRP M  29      59.155  65.084  43.653  0.00  0.00      MON1  
ATOM    379  HE1 TRP M  29      58.581  64.472  44.176  0.00  0.00      MON1  
ATOM    380  CE2 TRP M  29      60.102  64.624  42.797  0.00  0.00      MON1  
ATOM    381  CD2 TRP M  29      60.710  65.743  42.189  0.00  0.00      MON1  
ATOM    382  CE3 TRP M  29      61.676  65.566  41.217  0.00  0.00      MON1  
ATOM    383  HE3 TRP M  29      62.136  66.414  40.728  0.00  0.00      MON1  
ATOM    384  CZ3 TRP M  29      62.054  64.270  40.905  0.00  0.00      MON1  
ATOM    385  HZ3 TRP M  29      62.854  64.133  40.208  0.00  0.00      MON1  
ATOM    386  CZ2 TRP M  29      60.463  63.340  42.471  0.00  0.00      MON1  
ATOM    387  HZ2 TRP M  29      59.973  62.508  42.951  0.00  0.00      MON1  
ATOM    388  CH2 TRP M  29      61.446  63.175  41.499  0.00  0.00      MON1  
ATOM    389  HH2 TRP M  29      61.707  62.184  41.190  0.00  0.00      MON1  
ATOM    390  C   TRP M  29      59.799  70.697  42.270  0.00  0.00      MON1  
ATOM    391  O   TRP M  29      60.444  71.388  43.051  0.00  0.00      MON1  
ATOM    392  N   TYR M  30      59.519  71.075  41.009  0.00  0.00      MON1  
ATOM    393  HN  TYR M  30      58.953  70.486  40.434  0.00  0.00      MON1  
ATOM    394  CA  TYR M  30      59.881  72.321  40.388  0.00  0.00      MON1  
ATOM    395  HA  TYR M  30      60.954  72.430  40.470  0.00  0.00      MON1  
ATOM    396  CB  TYR M  30      59.489  72.341  38.887  0.00  0.00      MON1  
ATOM    397  HB1 TYR M  30      58.423  72.157  38.720  0.00  0.00      MON1  
ATOM    398  HB2 TYR M  30      60.070  71.590  38.312  0.00  0.00      MON1  
ATOM    399  CG  TYR M  30      59.700  73.690  38.309  0.00  0.00      MON1  
ATOM    400  CD1 TYR M  30      60.975  74.041  37.925  0.00  0.00      MON1  
ATOM    401  HD1 TYR M  30      61.787  73.330  38.007  0.00  0.00      MON1  
ATOM    402  CE1 TYR M  30      61.204  75.326  37.477  0.00  0.00      MON1  
ATOM    403  HE1 TYR M  30      62.213  75.509  37.316  0.00  0.00      MON1  
ATOM    404  CZ  TYR M  30      60.191  76.283  37.396  0.00  0.00      MON1  
ATOM    405  OH  TYR M  30      60.455  77.583  36.925  0.00  0.00      MON1  
ATOM    406  HH  TYR M  30      61.404  77.615  36.738  0.00  0.00      MON1  
ATOM    407  CD2 TYR M  30      58.661  74.640  38.277  0.00  0.00      MON1  
ATOM    408  HD2 TYR M  30      57.670  74.365  38.608  0.00  0.00      MON1  
ATOM    409  CE2 TYR M  30      58.907  75.935  37.817  0.00  0.00      MON1  
ATOM    410  HE2 TYR M  30      58.108  76.660  37.782  0.00  0.00      MON1  
ATOM    411  C   TYR M  30      59.290  73.533  41.051  0.00  0.00      MON1  
ATOM    412  O   TYR M  30      59.938  74.580  41.050  0.00  0.00      MON1  
ATOM    413  N   VAL M  31      58.018  73.424  41.496  0.00  0.00      MON1  
ATOM    414  HN  VAL M  31      57.596  72.523  41.510  0.00  0.00      MON1  
ATOM    415  CA  VAL M  31      57.216  74.507  42.034  0.00  0.00      MON1  
ATOM    416  HA  VAL M  31      56.791  75.026  41.188  0.00  0.00      MON1  
ATOM    417  CB  VAL M  31      56.091  74.021  42.922  0.00  0.00      MON1  
ATOM    418  HB  VAL M  31      56.518  73.416  43.759  0.00  0.00      MON1  
ATOM    419  CG1 VAL M  31      55.297  75.212  43.503  0.00  0.00      MON1  
ATOM    420 HG11 VAL M  31      55.002  75.932  42.712  0.00  0.00      MON1  
ATOM    421 HG12 VAL M  31      55.859  75.735  44.302  0.00  0.00      MON1  
ATOM    422 HG13 VAL M  31      54.364  74.831  43.973  0.00  0.00      MON1  
ATOM    423  CG2 VAL M  31      55.160  73.122  42.103  0.00  0.00      MON1  
ATOM    424 HG21 VAL M  31      55.697  72.339  41.534  0.00  0.00      MON1  
ATOM    425 HG22 VAL M  31      54.585  73.764  41.405  0.00  0.00      MON1  
ATOM    426 HG23 VAL M  31      54.427  72.622  42.772  0.00  0.00      MON1  
ATOM    427  C   VAL M  31      58.024  75.512  42.806  0.00  0.00      MON1  
ATOM    428  O   VAL M  31      58.972  75.166  43.510  0.00  0.00      MON1  
ATOM    429  N   SER M  32      57.690  76.806  42.659  0.00  0.00      MON1  
ATOM    430  HN  SER M  32      56.902  77.077  42.115  0.00  0.00      MON1  
ATOM    431  CA  SER M  32      58.430  77.834  43.337  0.00  0.00      MON1  
ATOM    432  HA  SER M  32      59.475  77.674  43.104  0.00  0.00      MON1  
ATOM    433  CB  SER M  32      58.059  79.269  42.901  0.00  0.00      MON1  
ATOM    434  HB1 SER M  32      58.070  79.325  41.789  0.00  0.00      MON1  
ATOM    435  HB2 SER M  32      58.823  79.990  43.273  0.00  0.00      MON1  
ATOM    436  OG  SER M  32      56.778  79.672  43.391  0.00  0.00      MON1  
ATOM    437  HG1 SER M  32      56.455  78.965  43.976  0.00  0.00      MON1  
ATOM    438  C   SER M  32      58.273  77.741  44.832  0.00  0.00      MON1  
ATOM    439  O   SER M  32      57.198  77.452  45.358  0.00  0.00      MON1  
ATOM    440  N   HSE M  33      59.371  78.030  45.534  0.00  0.00      MON1  
ATOM    441  HN  HSE M  33      60.265  78.023  45.090  0.00  0.00      MON1  
ATOM    442  CA  HSE M  33      59.404  78.077  46.967  0.00  0.00      MON1  
ATOM    443  HA  HSE M  33      58.840  77.238  47.351  0.00  0.00      MON1  
ATOM    444  CB  HSE M  33      60.858  77.957  47.461  0.00  0.00      MON1  
ATOM    445  HB1 HSE M  33      60.932  78.065  48.563  0.00  0.00      MON1  
ATOM    446  HB2 HSE M  33      61.511  78.690  46.961  0.00  0.00      MON1  
ATOM    447  ND1 HSE M  33      62.115  76.472  45.886  0.00  0.00      MON1  
ATOM    448  CG  HSE M  33      61.433  76.636  47.077  0.00  0.00      MON1  
ATOM    449  CE1 HSE M  33      62.444  75.187  45.851  0.00  0.00      MON1  
ATOM    450  HE1 HSE M  33      62.982  74.703  45.034  0.00  0.00      MON1  
ATOM    451  NE2 HSE M  33      62.012  74.526  46.949  0.00  0.00      MON1  
ATOM    452  HE2 HSE M  33      62.124  73.547  47.127  0.00  0.00      MON1  
ATOM    453  CD2 HSE M  33      61.367  75.454  47.738  0.00  0.00      MON1  
ATOM    454  HD2 HSE M  33      60.865  75.209  48.662  0.00  0.00      MON1  
ATOM    455  C   HSE M  33      58.743  79.318  47.495  0.00  0.00      MON1  
ATOM    456  O   HSE M  33      58.305  79.337  48.636  0.00  0.00      MON1  
ATOM    457  N   GLY M  34      58.640  80.398  46.701  0.00  0.00      MON1  
ATOM    458  HN  GLY M  34      59.027  80.423  45.784  0.00  0.00      MON1  
ATOM    459  CA  GLY M  34      57.902  81.571  47.139  0.00  0.00      MON1  
ATOM    460  HA1 GLY M  34      57.908  81.726  48.207  0.00  0.00      MON1  
ATOM    461  HA2 GLY M  34      56.891  81.437  46.783  0.00  0.00      MON1  
ATOM    462  C   GLY M  34      58.403  82.798  46.477  0.00  0.00      MON1  
ATOM    463  O   GLY M  34      59.090  82.740  45.458  0.00  0.00      MON1  
ATOM    464  N   SER M  35      57.987  83.951  47.016  0.00  0.00      MON1  
ATOM    465  HN  SER M  35      57.429  83.934  47.858  0.00  0.00      MON1  
ATOM    466  CA  SER M  35      58.319  85.243  46.459  0.00  0.00      MON1  
ATOM    467  HA  SER M  35      58.263  85.188  45.380  0.00  0.00      MON1  
ATOM    468  CB  SER M  35      57.418  86.388  46.970  0.00  0.00      MON1  
ATOM    469  HB1 SER M  35      57.661  87.341  46.452  0.00  0.00      MON1  
ATOM    470  HB2 SER M  35      57.543  86.530  48.066  0.00  0.00      MON1  
ATOM    471  OG  SER M  35      56.049  86.101  46.729  0.00  0.00      MON1  
ATOM    472  HG1 SER M  35      55.755  85.500  47.435  0.00  0.00      MON1  
ATOM    473  C   SER M  35      59.713  85.608  46.854  0.00  0.00      MON1  
ATOM    474  O   SER M  35      60.261  85.095  47.827  0.00  0.00      MON1  
ATOM    475  N   SER M  36      60.327  86.548  46.120  0.00  0.00      MON1  
ATOM    476  HN  SER M  36      59.933  86.920  45.284  0.00  0.00      MON1  
ATOM    477  CA  SER M  36      61.620  87.086  46.488  0.00  0.00      MON1  
ATOM    478  HA  SER M  36      62.317  86.268  46.600  0.00  0.00      MON1  
ATOM    479  CB  SER M  36      62.155  88.093  45.447  0.00  0.00      MON1  
ATOM    480  HB1 SER M  36      62.220  87.590  44.459  0.00  0.00      MON1  
ATOM    481  HB2 SER M  36      63.184  88.425  45.719  0.00  0.00      MON1  
ATOM    482  OG  SER M  36      61.292  89.227  45.321  0.00  0.00      MON1  
ATOM    483  HG1 SER M  36      61.793  90.017  45.592  0.00  0.00      MON1  
ATOM    484  C   SER M  36      61.529  87.800  47.804  0.00  0.00      MON1  
ATOM    485  O   SER M  36      62.421  87.730  48.645  0.00  0.00      MON1  
ATOM    486  N   PHE M  37      60.411  88.524  48.008  0.00  0.00      MON1  
ATOM    487  HN  PHE M  37      59.799  88.700  47.243  0.00  0.00      MON1  
ATOM    488  CA  PHE M  37      60.184  89.244  49.233  0.00  0.00      MON1  
ATOM    489  HA  PHE M  37      61.009  89.925  49.404  0.00  0.00      MON1  
ATOM    490  CB  PHE M  37      58.841  89.996  49.228  0.00  0.00      MON1  
ATOM    491  HB1 PHE M  37      58.731  90.628  50.126  0.00  0.00      MON1  
ATOM    492  HB2 PHE M  37      57.969  89.308  49.175  0.00  0.00      MON1  
ATOM    493  CG  PHE M  37      58.813  90.898  48.058  0.00  0.00      MON1  
ATOM    494  CD1 PHE M  37      59.532  92.100  48.078  0.00  0.00      MON1  
ATOM    495  HD1 PHE M  37      60.109  92.373  48.951  0.00  0.00      MON1  
ATOM    496  CE1 PHE M  37      59.529  92.930  46.959  0.00  0.00      MON1  
ATOM    497  HE1 PHE M  37      60.131  93.828  46.946  0.00  0.00      MON1  
ATOM    498  CZ  PHE M  37      58.818  92.544  45.826  0.00  0.00      MON1  
ATOM    499  HZ  PHE M  37      59.049  93.045  44.913  0.00  0.00      MON1  
ATOM    500  CD2 PHE M  37      58.059  90.551  46.933  0.00  0.00      MON1  
ATOM    501  HD2 PHE M  37      57.490  89.634  46.915  0.00  0.00      MON1  
ATOM    502  CE2 PHE M  37      58.055  91.376  45.810  0.00  0.00      MON1  
ATOM    503  HE2 PHE M  37      57.517  91.085  44.917  0.00  0.00      MON1  
ATOM    504  C   PHE M  37      60.136  88.287  50.370  0.00  0.00      MON1  
ATOM    505  O   PHE M  37      60.868  88.424  51.339  0.00  0.00      MON1  
ATOM    506  N   GLU M  38      59.337  87.218  50.224  0.00  0.00      MON1  
ATOM    507  HN  GLU M  38      58.776  87.086  49.418  0.00  0.00      MON1  
ATOM    508  CA  GLU M  38      59.205  86.220  51.249  0.00  0.00      MON1  
ATOM    509  HA  GLU M  38      58.903  86.697  52.171  0.00  0.00      MON1  
ATOM    510  CB  GLU M  38      58.174  85.159  50.889  0.00  0.00      MON1  
ATOM    511  HB1 GLU M  38      58.203  84.317  51.622  0.00  0.00      MON1  
ATOM    512  HB2 GLU M  38      58.455  84.745  49.892  0.00  0.00      MON1  
ATOM    513  CG  GLU M  38      56.742  85.690  50.884  0.00  0.00      MON1  
ATOM    514  HG1 GLU M  38      56.634  86.603  50.270  0.00  0.00      MON1  
ATOM    515  HG2 GLU M  38      56.409  85.902  51.922  0.00  0.00      MON1  
ATOM    516  CD  GLU M  38      55.811  84.616  50.299  0.00  0.00      MON1  
ATOM    517  OE1 GLU M  38      56.337  83.770  49.540  0.00  0.00      MON1  
ATOM    518  OE2 GLU M  38      54.602  84.484  50.504  0.00  0.00      MON1  
ATOM    519  C   GLU M  38      60.514  85.548  51.508  0.00  0.00      MON1  
ATOM    520  O   GLU M  38      60.845  85.260  52.651  0.00  0.00      MON1  
ATOM    521  N   ALA M  39      61.315  85.314  50.447  0.00  0.00      MON1  
ATOM    522  HN  ALA M  39      60.991  85.459  49.509  0.00  0.00      MON1  
ATOM    523  CA  ALA M  39      62.634  84.759  50.602  0.00  0.00      MON1  
ATOM    524  HA  ALA M  39      62.544  83.831  51.129  0.00  0.00      MON1  
ATOM    525  CB  ALA M  39      63.341  84.564  49.246  0.00  0.00      MON1  
ATOM    526  HB1 ALA M  39      63.495  85.526  48.719  0.00  0.00      MON1  
ATOM    527  HB2 ALA M  39      62.717  83.913  48.596  0.00  0.00      MON1  
ATOM    528  HB3 ALA M  39      64.325  84.066  49.385  0.00  0.00      MON1  
ATOM    529  C   ALA M  39      63.493  85.626  51.465  0.00  0.00      MON1  
ATOM    530  O   ALA M  39      64.138  85.149  52.391  0.00  0.00      MON1  
ATOM    531  N   THR M  40      63.454  86.943  51.216  0.00  0.00      MON1  
ATOM    532  HN  THR M  40      62.870  87.286  50.480  0.00  0.00      MON1  
ATOM    533  CA  THR M  40      64.219  87.899  51.988  0.00  0.00      MON1  
ATOM    534  HA  THR M  40      65.264  87.620  51.950  0.00  0.00      MON1  
ATOM    535  CB  THR M  40      64.062  89.324  51.505  0.00  0.00      MON1  
ATOM    536  HB  THR M  40      63.016  89.696  51.607  0.00  0.00      MON1  
ATOM    537  OG1 THR M  40      64.412  89.400  50.127  0.00  0.00      MON1  
ATOM    538  HG1 THR M  40      63.768  88.852  49.660  0.00  0.00      MON1  
ATOM    539  CG2 THR M  40      64.987  90.249  52.314  0.00  0.00      MON1  
ATOM    540 HG21 THR M  40      66.041  89.902  52.259  0.00  0.00      MON1  
ATOM    541 HG22 THR M  40      64.687  90.331  53.377  0.00  0.00      MON1  
ATOM    542 HG23 THR M  40      64.947  91.278  51.891  0.00  0.00      MON1  
ATOM    543  C   THR M  40      63.789  87.878  53.412  0.00  0.00      MON1  
ATOM    544  O   THR M  40      64.605  87.740  54.315  0.00  0.00      MON1  
ATOM    545  N   PHE M  41      62.468  87.926  53.654  0.00  0.00      MON1  
ATOM    546  HN  PHE M  41      61.813  88.047  52.902  0.00  0.00      MON1  
ATOM    547  CA  PHE M  41      61.953  87.907  54.997  0.00  0.00      MON1  
ATOM    548  HA  PHE M  41      62.443  88.700  55.546  0.00  0.00      MON1  
ATOM    549  CB  PHE M  41      60.432  88.092  55.067  0.00  0.00      MON1  
ATOM    550  HB1 PHE M  41      60.092  88.035  56.119  0.00  0.00      MON1  
ATOM    551  HB2 PHE M  41      59.890  87.343  54.450  0.00  0.00      MON1  
ATOM    552  CG  PHE M  41      60.130  89.468  54.603  0.00  0.00      MON1  
ATOM    553  CD1 PHE M  41      60.503  90.565  55.389  0.00  0.00      MON1  
ATOM    554  HD1 PHE M  41      61.011  90.412  56.329  0.00  0.00      MON1  
ATOM    555  CE1 PHE M  41      60.247  91.865  54.948  0.00  0.00      MON1  
ATOM    556  HE1 PHE M  41      60.561  92.716  55.537  0.00  0.00      MON1  
ATOM    557  CZ  PHE M  41      59.619  92.073  53.718  0.00  0.00      MON1  
ATOM    558  HZ  PHE M  41      59.440  93.083  53.373  0.00  0.00      MON1  
ATOM    559  CD2 PHE M  41      59.456  89.686  53.404  0.00  0.00      MON1  
ATOM    560  HD2 PHE M  41      59.075  88.845  52.850  0.00  0.00      MON1  
ATOM    561  CE2 PHE M  41      59.221  90.982  52.947  0.00  0.00      MON1  
ATOM    562  HE2 PHE M  41      58.668  91.165  52.046  0.00  0.00      MON1  
ATOM    563  C   PHE M  41      62.324  86.649  55.707  0.00  0.00      MON1  
ATOM    564  O   PHE M  41      62.682  86.680  56.878  0.00  0.00      MON1  
ATOM    565  N   ALA M  42      62.288  85.505  55.003  0.00  0.00      MON1  
ATOM    566  HN  ALA M  42      61.954  85.489  54.055  0.00  0.00      MON1  
ATOM    567  CA  ALA M  42      62.695  84.250  55.571  0.00  0.00      MON1  
ATOM    568  HA  ALA M  42      62.101  84.069  56.457  0.00  0.00      MON1  
ATOM    569  CB  ALA M  42      62.501  83.092  54.578  0.00  0.00      MON1  
ATOM    570  HB1 ALA M  42      63.084  83.262  53.649  0.00  0.00      MON1  
ATOM    571  HB2 ALA M  42      61.427  83.015  54.298  0.00  0.00      MON1  
ATOM    572  HB3 ALA M  42      62.816  82.121  55.015  0.00  0.00      MON1  
ATOM    573  C   ALA M  42      64.138  84.296  55.995  0.00  0.00      MON1  
ATOM    574  O   ALA M  42      64.467  83.907  57.110  0.00  0.00      MON1  
ATOM    575  N   HSE M  43      65.018  84.844  55.140  0.00  0.00      MON1  
ATOM    576  HN  HSE M  43      64.715  85.157  54.234  0.00  0.00      MON1  
ATOM    577  CA  HSE M  43      66.432  84.939  55.427  0.00  0.00      MON1  
ATOM    578  HA  HSE M  43      66.807  83.953  55.645  0.00  0.00      MON1  
ATOM    579  CB  HSE M  43      67.224  85.508  54.232  0.00  0.00      MON1  
ATOM    580  HB1 HSE M  43      68.306  85.571  54.466  0.00  0.00      MON1  
ATOM    581  HB2 HSE M  43      66.862  86.526  53.973  0.00  0.00      MON1  
ATOM    582  ND1 HSE M  43      67.599  85.094  51.783  0.00  0.00      MON1  
ATOM    583  CG  HSE M  43      67.093  84.661  52.993  0.00  0.00      MON1  
ATOM    584  CE1 HSE M  43      67.321  84.133  50.918  0.00  0.00      MON1  
ATOM    585  HE1 HSE M  43      67.618  84.143  49.870  0.00  0.00      MON1  
ATOM    586  NE2 HSE M  43      66.661  83.107  51.499  0.00  0.00      MON1  
ATOM    587  HE2 HSE M  43      66.455  82.218  51.093  0.00  0.00      MON1  
ATOM    588  CD2 HSE M  43      66.515  83.440  52.829  0.00  0.00      MON1  
ATOM    589  HD2 HSE M  43      66.050  82.793  53.561  0.00  0.00      MON1  
ATOM    590  C   HSE M  43      66.691  85.775  56.646  0.00  0.00      MON1  
ATOM    591  O   HSE M  43      67.492  85.421  57.508  0.00  0.00      MON1  
ATOM    592  N   VAL M  44      65.974  86.908  56.767  0.00  0.00      MON1  
ATOM    593  HN  VAL M  44      65.351  87.189  56.030  0.00  0.00      MON1  
ATOM    594  CA  VAL M  44      66.130  87.812  57.883  0.00  0.00      MON1  
ATOM    595  HA  VAL M  44      67.156  88.149  57.917  0.00  0.00      MON1  
ATOM    596  CB  VAL M  44      65.197  89.004  57.774  0.00  0.00      MON1  
ATOM    597  HB  VAL M  44      64.127  88.682  57.771  0.00  0.00      MON1  
ATOM    598  CG1 VAL M  44      65.419  89.934  58.980  0.00  0.00      MON1  
ATOM    599 HG11 VAL M  44      66.490  90.217  59.065  0.00  0.00      MON1  
ATOM    600 HG12 VAL M  44      65.087  89.479  59.935  0.00  0.00      MON1  
ATOM    601 HG13 VAL M  44      64.829  90.865  58.837  0.00  0.00      MON1  
ATOM    602  CG2 VAL M  44      65.451  89.745  56.451  0.00  0.00      MON1  
ATOM    603 HG21 VAL M  44      64.635  89.562  55.727  0.00  0.00      MON1  
ATOM    604 HG22 VAL M  44      66.422  89.469  55.988  0.00  0.00      MON1  
ATOM    605 HG23 VAL M  44      65.470  90.844  56.622  0.00  0.00      MON1  
ATOM    606  C   VAL M  44      65.819  87.138  59.190  0.00  0.00      MON1  
ATOM    607  O   VAL M  44      66.574  87.223  60.163  0.00  0.00      MON1  
ATOM    608  N   CYS M  45      64.685  86.419  59.226  0.00  0.00      MON1  
ATOM    609  HN  CYS M  45      64.105  86.358  58.411  0.00  0.00      MON1  
ATOM    610  CA  CYS M  45      64.217  85.756  60.421  0.00  0.00      MON1  
ATOM    611  HA  CYS M  45      64.123  86.484  61.215  0.00  0.00      MON1  
ATOM    612  CB  CYS M  45      62.884  85.043  60.196  0.00  0.00      MON1  
ATOM    613  HB1 CYS M  45      62.554  84.543  61.131  0.00  0.00      MON1  
ATOM    614  HB2 CYS M  45      63.029  84.295  59.409  0.00  0.00      MON1  
ATOM    615  SG  CYS M  45      61.612  86.174  59.655  0.00  0.00      MON1  
ATOM    616  HG1 CYS M  45      61.965  86.176  58.379  0.00  0.00      MON1  
ATOM    617  C   CYS M  45      65.187  84.719  60.859  0.00  0.00      MON1  
ATOM    618  O   CYS M  45      65.481  84.566  62.043  0.00  0.00      MON1  
ATOM    619  N   GLN M  46      65.731  83.990  59.876  0.00  0.00      MON1  
ATOM    620  HN  GLN M  46      65.480  84.126  58.916  0.00  0.00      MON1  
ATOM    621  CA  GLN M  46      66.651  82.955  60.171  0.00  0.00      MON1  
ATOM    622  HA  GLN M  46      66.181  82.264  60.857  0.00  0.00      MON1  
ATOM    623  CB  GLN M  46      67.018  82.212  58.908  0.00  0.00      MON1  
ATOM    624  HB1 GLN M  46      67.716  81.484  59.324  0.00  0.00      MON1  
ATOM    625  HB2 GLN M  46      67.516  82.882  58.172  0.00  0.00      MON1  
ATOM    626  CG  GLN M  46      65.863  81.413  58.299  0.00  0.00      MON1  
ATOM    627  HG1 GLN M  46      64.941  81.999  58.259  0.00  0.00      MON1  
ATOM    628  HG2 GLN M  46      65.657  80.535  58.950  0.00  0.00      MON1  
ATOM    629  CD  GLN M  46      66.211  80.958  56.888  0.00  0.00      MON1  
ATOM    630  OE1 GLN M  46      66.743  81.699  56.064  0.00  0.00      MON1  
ATOM    631  NE2 GLN M  46      65.891  79.694  56.584  0.00  0.00      MON1  
ATOM    632 HE21 GLN M  46      65.573  79.078  57.306  0.00  0.00      MON1  
ATOM    633 HE22 GLN M  46      66.025  79.364  55.649  0.00  0.00      MON1  
ATOM    634  C   GLN M  46      67.871  83.502  60.841  0.00  0.00      MON1  
ATOM    635  O   GLN M  46      68.208  83.158  61.942  0.00  0.00      MON1  
ATOM    636  N   TRP M  47      68.490  84.551  60.323  0.00  0.00      MON1  
ATOM    637  HN  TRP M  47      68.218  84.933  59.436  0.00  0.00      MON1  
ATOM    638  CA  TRP M  47      69.640  85.110  60.999  0.00  0.00      MON1  
ATOM    639  HA  TRP M  47      70.384  84.332  61.087  0.00  0.00      MON1  
ATOM    640  CB  TRP M  47      70.238  86.289  60.223  0.00  0.00      MON1  
ATOM    641  HB1 TRP M  47      71.064  86.762  60.799  0.00  0.00      MON1  
ATOM    642  HB2 TRP M  47      69.453  87.061  60.056  0.00  0.00      MON1  
ATOM    643  CG  TRP M  47      70.790  85.860  58.909  0.00  0.00      MON1  
ATOM    644  CD1 TRP M  47      70.332  86.140  57.653  0.00  0.00      MON1  
ATOM    645  HD1 TRP M  47      69.487  86.783  57.439  0.00  0.00      MON1  
ATOM    646  NE1 TRP M  47      71.110  85.487  56.724  0.00  0.00      MON1  
ATOM    647  HE1 TRP M  47      70.956  85.418  55.762  0.00  0.00      MON1  
ATOM    648  CE2 TRP M  47      72.090  84.790  57.370  0.00  0.00      MON1  
ATOM    649  CD2 TRP M  47      71.921  85.003  58.755  0.00  0.00      MON1  
ATOM    650  CE3 TRP M  47      72.788  84.411  59.665  0.00  0.00      MON1  
ATOM    651  HE3 TRP M  47      72.681  84.562  60.727  0.00  0.00      MON1  
ATOM    652  CZ3 TRP M  47      73.820  83.619  59.174  0.00  0.00      MON1  
ATOM    653  HZ3 TRP M  47      74.511  83.153  59.867  0.00  0.00      MON1  
ATOM    654  CZ2 TRP M  47      73.113  83.999  56.881  0.00  0.00      MON1  
ATOM    655  HZ2 TRP M  47      73.251  83.838  55.823  0.00  0.00      MON1  
ATOM    656  CH2 TRP M  47      73.983  83.417  57.806  0.00  0.00      MON1  
ATOM    657  HH2 TRP M  47      74.800  82.802  57.450  0.00  0.00      MON1  
ATOM    658  C   TRP M  47      69.327  85.567  62.392  0.00  0.00      MON1  
ATOM    659  O   TRP M  47      70.131  85.398  63.300  0.00  0.00      MON1  
ATOM    660  N   SER M  48      68.116  86.119  62.589  0.00  0.00      MON1  
ATOM    661  HN  SER M  48      67.486  86.207  61.817  0.00  0.00      MON1  
ATOM    662  CA  SER M  48      67.658  86.504  63.897  0.00  0.00      MON1  
ATOM    663  HA  SER M  48      68.364  87.222  64.293  0.00  0.00      MON1  
ATOM    664  CB  SER M  48      66.257  87.145  63.909  0.00  0.00      MON1  
ATOM    665  HB1 SER M  48      65.958  87.478  64.923  0.00  0.00      MON1  
ATOM    666  HB2 SER M  48      65.477  86.442  63.551  0.00  0.00      MON1  
ATOM    667  OG  SER M  48      66.247  88.302  63.082  0.00  0.00      MON1  
ATOM    668  HG1 SER M  48      66.373  88.011  62.166  0.00  0.00      MON1  
ATOM    669  C   SER M  48      67.701  85.307  64.792  0.00  0.00      MON1  
ATOM    670  O   SER M  48      68.552  85.281  65.660  0.00  0.00      MON1  
ATOM    671  N   ILE M  49      66.899  84.252  64.582  0.00  0.00      MON1  
ATOM    672  HN  ILE M  49      66.301  84.230  63.774  0.00  0.00      MON1  
ATOM    673  CA  ILE M  49      66.877  83.067  65.444  0.00  0.00      MON1  
ATOM    674  HA  ILE M  49      66.615  83.378  66.421  0.00  0.00      MON1  
ATOM    675  CB  ILE M  49      65.732  82.090  65.192  0.00  0.00      MON1  
ATOM    676  HB  ILE M  49      64.792  82.694  65.162  0.00  0.00      MON1  
ATOM    677  CG2 ILE M  49      65.845  81.366  63.847  0.00  0.00      MON1  
ATOM    678 HG21 ILE M  49      66.678  80.634  63.880  0.00  0.00      MON1  
ATOM    679 HG22 ILE M  49      66.008  82.088  63.021  0.00  0.00      MON1  
ATOM    680 HG23 ILE M  49      64.918  80.795  63.629  0.00  0.00      MON1  
ATOM    681  CG1 ILE M  49      65.603  81.081  66.358  0.00  0.00      MON1  
ATOM    682 HG11 ILE M  49      65.727  81.613  67.327  0.00  0.00      MON1  
ATOM    683 HG12 ILE M  49      66.416  80.324  66.290  0.00  0.00      MON1  
ATOM    684  CD  ILE M  49      64.251  80.372  66.369  0.00  0.00      MON1  
ATOM    685  HD1 ILE M  49      64.158  79.698  65.489  0.00  0.00      MON1  
ATOM    686  HD2 ILE M  49      63.419  81.103  66.334  0.00  0.00      MON1  
ATOM    687  HD3 ILE M  49      64.144  79.753  67.285  0.00  0.00      MON1  
ATOM    688  C   ILE M  49      68.252  82.439  65.650  0.00  0.00      MON1  
ATOM    689  O   ILE M  49      68.571  81.924  66.720  0.00  0.00      MON1  
ATOM    690  N   PHE M  50      69.137  82.559  64.647  0.00  0.00      MON1  
ATOM    691  HN  PHE M  50      68.833  82.944  63.772  0.00  0.00      MON1  
ATOM    692  CA  PHE M  50      70.523  82.171  64.735  0.00  0.00      MON1  
ATOM    693  HA  PHE M  50      70.571  81.157  65.101  0.00  0.00      MON1  
ATOM    694  CB  PHE M  50      71.198  82.226  63.339  0.00  0.00      MON1  
ATOM    695  HB1 PHE M  50      70.771  83.027  62.710  0.00  0.00      MON1  
ATOM    696  HB2 PHE M  50      71.089  81.252  62.844  0.00  0.00      MON1  
ATOM    697  CG  PHE M  50      72.655  82.349  63.343  0.00  0.00      MON1  
ATOM    698  CD1 PHE M  50      73.448  81.200  63.394  0.00  0.00      MON1  
ATOM    699  HD1 PHE M  50      72.993  80.222  63.431  0.00  0.00      MON1  
ATOM    700  CE1 PHE M  50      74.832  81.323  63.381  0.00  0.00      MON1  
ATOM    701  HE1 PHE M  50      75.453  80.438  63.406  0.00  0.00      MON1  
ATOM    702  CZ  PHE M  50      75.420  82.594  63.340  0.00  0.00      MON1  
ATOM    703  HZ  PHE M  50      76.496  82.688  63.336  0.00  0.00      MON1  
ATOM    704  CD2 PHE M  50      73.237  83.614  63.301  0.00  0.00      MON1  
ATOM    705  HD2 PHE M  50      72.617  84.497  63.261  0.00  0.00      MON1  
ATOM    706  CE2 PHE M  50      74.622  83.741  63.320  0.00  0.00      MON1  
ATOM    707  HE2 PHE M  50      75.079  84.720  63.290  0.00  0.00      MON1  
ATOM    708  C   PHE M  50      71.280  83.003  65.716  0.00  0.00      MON1  
ATOM    709  O   PHE M  50      71.953  82.502  66.600  0.00  0.00      MON1  
ATOM    710  N   ALA M  51      71.187  84.323  65.594  0.00  0.00      MON1  
ATOM    711  HN  ALA M  51      70.604  84.740  64.887  0.00  0.00      MON1  
ATOM    712  CA  ALA M  51      71.946  85.190  66.428  0.00  0.00      MON1  
ATOM    713  HA  ALA M  51      72.987  84.902  66.355  0.00  0.00      MON1  
ATOM    714  CB  ALA M  51      71.778  86.612  65.927  0.00  0.00      MON1  
ATOM    715  HB1 ALA M  51      70.813  87.064  66.236  0.00  0.00      MON1  
ATOM    716  HB2 ALA M  51      71.786  86.608  64.814  0.00  0.00      MON1  
ATOM    717  HB3 ALA M  51      72.669  87.202  66.219  0.00  0.00      MON1  
ATOM    718  C   ALA M  51      71.537  85.056  67.863  0.00  0.00      MON1  
ATOM    719  O   ALA M  51      72.366  84.901  68.748  0.00  0.00      MON1  
ATOM    720  N   VAL M  52      70.228  85.036  68.130  0.00  0.00      MON1  
ATOM    721  HN  VAL M  52      69.556  85.112  67.390  0.00  0.00      MON1  
ATOM    722  CA  VAL M  52      69.761  84.881  69.489  0.00  0.00      MON1  
ATOM    723  HA  VAL M  52      70.317  85.585  70.092  0.00  0.00      MON1  
ATOM    724  CB  VAL M  52      68.300  85.042  69.732  0.00  0.00      MON1  
ATOM    725  HB  VAL M  52      68.073  84.744  70.788  0.00  0.00      MON1  
ATOM    726  CG1 VAL M  52      68.220  86.544  69.771  0.00  0.00      MON1  
ATOM    727 HG11 VAL M  52      68.654  86.991  68.928  0.00  0.00      MON1  
ATOM    728 HG12 VAL M  52      68.927  86.878  70.572  0.00  0.00      MON1  
ATOM    729 HG13 VAL M  52      67.335  86.932  70.222  0.00  0.00      MON1  
ATOM    730  CG2 VAL M  52      67.516  84.003  68.877  0.00  0.00      MON1  
ATOM    731 HG21 VAL M  52      67.697  82.983  69.248  0.00  0.00      MON1  
ATOM    732 HG22 VAL M  52      67.843  83.962  67.832  0.00  0.00      MON1  
ATOM    733 HG23 VAL M  52      66.431  84.000  68.982  0.00  0.00      MON1  
ATOM    734  C   VAL M  52      70.071  83.588  70.100  0.00  0.00      MON1  
ATOM    735  O   VAL M  52      70.392  83.550  71.280  0.00  0.00      MON1  
ATOM    736  N   CYS M  53      69.982  82.480  69.341  0.00  0.00      MON1  
ATOM    737  HN  CYS M  53      69.680  82.519  68.386  0.00  0.00      MON1  
ATOM    738  CA  CYS M  53      70.247  81.191  69.907  0.00  0.00      MON1  
ATOM    739  HA  CYS M  53      69.641  81.079  70.797  0.00  0.00      MON1  
ATOM    740  CB  CYS M  53      69.973  80.013  68.944  0.00  0.00      MON1  
ATOM    741  HB1 CYS M  53      68.942  80.114  68.541  0.00  0.00      MON1  
ATOM    742  HB2 CYS M  53      69.996  79.070  69.537  0.00  0.00      MON1  
ATOM    743  SG  CYS M  53      71.145  79.855  67.568  0.00  0.00      MON1  
ATOM    744  HG1 CYS M  53      70.833  81.015  67.001  0.00  0.00      MON1  
ATOM    745  C   CYS M  53      71.681  81.187  70.341  0.00  0.00      MON1  
ATOM    746  O   CYS M  53      71.998  80.677  71.400  0.00  0.00      MON1  
ATOM    747  N   ILE M  54      72.575  81.819  69.549  0.00  0.00      MON1  
ATOM    748  HN  ILE M  54      72.300  82.207  68.668  0.00  0.00      MON1  
ATOM    749  CA  ILE M  54      73.960  81.941  69.915  0.00  0.00      MON1  
ATOM    750  HA  ILE M  54      74.352  80.953  70.108  0.00  0.00      MON1  
ATOM    751  CB  ILE M  54      74.803  82.617  68.849  0.00  0.00      MON1  
ATOM    752  HB  ILE M  54      74.369  83.600  68.562  0.00  0.00      MON1  
ATOM    753  CG2 ILE M  54      76.226  82.853  69.405  0.00  0.00      MON1  
ATOM    754 HG21 ILE M  54      76.636  81.910  69.822  0.00  0.00      MON1  
ATOM    755 HG22 ILE M  54      76.233  83.651  70.174  0.00  0.00      MON1  
ATOM    756 HG23 ILE M  54      76.925  83.209  68.627  0.00  0.00      MON1  
ATOM    757  CG1 ILE M  54      74.852  81.749  67.590  0.00  0.00      MON1  
ATOM    758 HG11 ILE M  54      73.849  81.441  67.251  0.00  0.00      MON1  
ATOM    759 HG12 ILE M  54      75.383  80.807  67.865  0.00  0.00      MON1  
ATOM    760  CD  ILE M  54      75.609  82.402  66.437  0.00  0.00      MON1  
ATOM    761  HD1 ILE M  54      76.592  82.816  66.723  0.00  0.00      MON1  
ATOM    762  HD2 ILE M  54      74.996  83.216  65.994  0.00  0.00      MON1  
ATOM    763  HD3 ILE M  54      75.811  81.623  65.677  0.00  0.00      MON1  
ATOM    764  C   ILE M  54      74.103  82.726  71.175  0.00  0.00      MON1  
ATOM    765  O   ILE M  54      74.751  82.284  72.112  0.00  0.00      MON1  
ATOM    766  N   LEU M  55      73.444  83.891  71.269  0.00  0.00      MON1  
ATOM    767  HN  LEU M  55      72.903  84.234  70.497  0.00  0.00      MON1  
ATOM    768  CA  LEU M  55      73.544  84.715  72.452  0.00  0.00      MON1  
ATOM    769  HA  LEU M  55      74.585  84.925  72.639  0.00  0.00      MON1  
ATOM    770  CB  LEU M  55      72.667  85.982  72.356  0.00  0.00      MON1  
ATOM    771  HB1 LEU M  55      72.650  86.529  73.327  0.00  0.00      MON1  
ATOM    772  HB2 LEU M  55      71.616  85.700  72.118  0.00  0.00      MON1  
ATOM    773  CG  LEU M  55      73.172  86.916  71.288  0.00  0.00      MON1  
ATOM    774  HG  LEU M  55      73.094  86.357  70.350  0.00  0.00      MON1  
ATOM    775  CD1 LEU M  55      72.360  88.166  71.129  0.00  0.00      MON1  
ATOM    776 HD11 LEU M  55      72.189  88.688  72.084  0.00  0.00      MON1  
ATOM    777 HD12 LEU M  55      71.410  87.848  70.650  0.00  0.00      MON1  
ATOM    778 HD13 LEU M  55      72.879  88.840  70.424  0.00  0.00      MON1  
ATOM    779  CD2 LEU M  55      74.561  87.282  71.714  0.00  0.00      MON1  
ATOM    780 HD21 LEU M  55      75.308  86.483  71.588  0.00  0.00      MON1  
ATOM    781 HD22 LEU M  55      74.545  87.436  72.819  0.00  0.00      MON1  
ATOM    782 HD23 LEU M  55      74.842  88.277  71.384  0.00  0.00      MON1  
ATOM    783  C   LEU M  55      73.080  83.993  73.659  0.00  0.00      MON1  
ATOM    784  O   LEU M  55      73.737  84.010  74.694  0.00  0.00      MON1  
ATOM    785  N   SER M  56      71.947  83.290  73.536  0.00  0.00      MON1  
ATOM    786  HN  SER M  56      71.400  83.323  72.691  0.00  0.00      MON1  
ATOM    787  CA  SER M  56      71.414  82.505  74.618  0.00  0.00      MON1  
ATOM    788  HA  SER M  56      71.246  83.148  75.470  0.00  0.00      MON1  
ATOM    789  CB  SER M  56      70.108  81.781  74.261  0.00  0.00      MON1  
ATOM    790  HB1 SER M  56      69.734  81.188  75.121  0.00  0.00      MON1  
ATOM    791  HB2 SER M  56      70.254  81.102  73.391  0.00  0.00      MON1  
ATOM    792  OG  SER M  56      69.122  82.725  73.939  0.00  0.00      MON1  
ATOM    793  HG1 SER M  56      68.599  82.411  73.182  0.00  0.00      MON1  
ATOM    794  C   SER M  56      72.382  81.448  75.022  0.00  0.00      MON1  
ATOM    795  O   SER M  56      72.636  81.257  76.203  0.00  0.00      MON1  
ATOM    796  N   LEU M  57      72.993  80.757  74.043  0.00  0.00      MON1  
ATOM    797  HN  LEU M  57      72.778  80.918  73.074  0.00  0.00      MON1  
ATOM    798  CA  LEU M  57      73.969  79.737  74.327  0.00  0.00      MON1  
ATOM    799  HA  LEU M  57      73.522  79.026  75.005  0.00  0.00      MON1  
ATOM    800  CB  LEU M  57      74.488  79.030  73.057  0.00  0.00      MON1  
ATOM    801  HB1 LEU M  57      75.370  78.394  73.305  0.00  0.00      MON1  
ATOM    802  HB2 LEU M  57      74.817  79.784  72.311  0.00  0.00      MON1  
ATOM    803  CG  LEU M  57      73.463  78.095  72.396  0.00  0.00      MON1  
ATOM    804  HG  LEU M  57      72.571  78.649  72.062  0.00  0.00      MON1  
ATOM    805  CD1 LEU M  57      74.065  77.429  71.151  0.00  0.00      MON1  
ATOM    806 HD11 LEU M  57      74.931  76.792  71.429  0.00  0.00      MON1  
ATOM    807 HD12 LEU M  57      74.404  78.200  70.427  0.00  0.00      MON1  
ATOM    808 HD13 LEU M  57      73.306  76.794  70.648  0.00  0.00      MON1  
ATOM    809  CD2 LEU M  57      72.932  77.069  73.401  0.00  0.00      MON1  
ATOM    810 HD21 LEU M  57      72.307  77.548  74.182  0.00  0.00      MON1  
ATOM    811 HD22 LEU M  57      73.781  76.550  73.895  0.00  0.00      MON1  
ATOM    812 HD23 LEU M  57      72.326  76.298  72.891  0.00  0.00      MON1  
ATOM    813  C   LEU M  57      75.150  80.273  75.062  0.00  0.00      MON1  
ATOM    814  O   LEU M  57      75.589  79.675  76.035  0.00  0.00      MON1  
ATOM    815  N   LEU M  58      75.686  81.431  74.652  0.00  0.00      MON1  
ATOM    816  HN  LEU M  58      75.339  81.900  73.833  0.00  0.00      MON1  
ATOM    817  CA  LEU M  58      76.794  82.012  75.366  0.00  0.00      MON1  
ATOM    818  HA  LEU M  58      77.546  81.245  75.477  0.00  0.00      MON1  
ATOM    819  CB  LEU M  58      77.397  83.260  74.683  0.00  0.00      MON1  
ATOM    820  HB1 LEU M  58      78.007  83.842  75.412  0.00  0.00      MON1  
ATOM    821  HB2 LEU M  58      76.569  83.916  74.333  0.00  0.00      MON1  
ATOM    822  CG  LEU M  58      78.332  82.936  73.505  0.00  0.00      MON1  
ATOM    823  HG  LEU M  58      78.718  83.911  73.111  0.00  0.00      MON1  
ATOM    824  CD1 LEU M  58      79.541  82.128  73.983  0.00  0.00      MON1  
ATOM    825 HD11 LEU M  58      79.665  81.198  73.391  0.00  0.00      MON1  
ATOM    826 HD12 LEU M  58      79.432  81.823  75.044  0.00  0.00      MON1  
ATOM    827 HD13 LEU M  58      80.463  82.741  73.948  0.00  0.00      MON1  
ATOM    828  CD2 LEU M  58      77.615  82.251  72.348  0.00  0.00      MON1  
ATOM    829 HD21 LEU M  58      76.860  82.968  71.987  0.00  0.00      MON1  
ATOM    830 HD22 LEU M  58      77.151  81.287  72.629  0.00  0.00      MON1  
ATOM    831 HD23 LEU M  58      78.311  82.057  71.508  0.00  0.00      MON1  
ATOM    832  C   LEU M  58      76.385  82.364  76.760  0.00  0.00      MON1  
ATOM    833  O   LEU M  58      77.098  82.068  77.712  0.00  0.00      MON1  
ATOM    834  N   TRP M  59      75.190  82.957  76.925  0.00  0.00      MON1  
ATOM    835  HN  TRP M  59      74.613  83.209  76.141  0.00  0.00      MON1  
ATOM    836  CA  TRP M  59      74.710  83.274  78.245  0.00  0.00      MON1  
ATOM    837  HA  TRP M  59      75.483  83.850  78.721  0.00  0.00      MON1  
ATOM    838  CB  TRP M  59      73.371  84.055  78.222  0.00  0.00      MON1  
ATOM    839  HB1 TRP M  59      72.960  84.145  79.252  0.00  0.00      MON1  
ATOM    840  HB2 TRP M  59      72.626  83.500  77.610  0.00  0.00      MON1  
ATOM    841  CG  TRP M  59      73.516  85.438  77.690  0.00  0.00      MON1  
ATOM    842  CD1 TRP M  59      72.883  86.052  76.644  0.00  0.00      MON1  
ATOM    843  HD1 TRP M  59      72.118  85.581  76.038  0.00  0.00      MON1  
ATOM    844  NE1 TRP M  59      73.388  87.323  76.486  0.00  0.00      MON1  
ATOM    845  HE1 TRP M  59      73.121  87.989  75.826  0.00  0.00      MON1  
ATOM    846  CE2 TRP M  59      74.356  87.541  77.427  0.00  0.00      MON1  
ATOM    847  CD2 TRP M  59      74.460  86.372  78.211  0.00  0.00      MON1  
ATOM    848  CE3 TRP M  59      75.365  86.316  79.266  0.00  0.00      MON1  
ATOM    849  HE3 TRP M  59      75.424  85.468  79.930  0.00  0.00      MON1  
ATOM    850  CZ3 TRP M  59      76.171  87.420  79.507  0.00  0.00      MON1  
ATOM    851  HZ3 TRP M  59      76.869  87.408  80.335  0.00  0.00      MON1  
ATOM    852  CZ2 TRP M  59      75.152  88.645  77.673  0.00  0.00      MON1  
ATOM    853  HZ2 TRP M  59      75.072  89.544  77.084  0.00  0.00      MON1  
ATOM    854  CH2 TRP M  59      76.065  88.567  78.728  0.00  0.00      MON1  
ATOM    855  HH2 TRP M  59      76.689  89.422  78.956  0.00  0.00      MON1  
ATOM    856  C   TRP M  59      74.536  82.072  79.133  0.00  0.00      MON1  
ATOM    857  O   TRP M  59      75.049  82.049  80.250  0.00  0.00      MON1  
ATOM    858  N   TYR M  60      73.853  81.022  78.648  0.00  0.00      MON1  
ATOM    859  HN  TYR M  60      73.427  81.083  77.737  0.00  0.00      MON1  
ATOM    860  CA  TYR M  60      73.679  79.762  79.343  0.00  0.00      MON1  
ATOM    861  HA  TYR M  60      73.254  79.976  80.314  0.00  0.00      MON1  
ATOM    862  CB  TYR M  60      72.744  78.788  78.573  0.00  0.00      MON1  
ATOM    863  HB1 TYR M  60      72.666  77.835  79.141  0.00  0.00      MON1  
ATOM    864  HB2 TYR M  60      73.185  78.574  77.574  0.00  0.00      MON1  
ATOM    865  CG  TYR M  60      71.320  79.261  78.382  0.00  0.00      MON1  
ATOM    866  CD1 TYR M  60      70.576  79.806  79.448  0.00  0.00      MON1  
ATOM    867  HD1 TYR M  60      71.032  79.934  80.418  0.00  0.00      MON1  
ATOM    868  CE1 TYR M  60      69.227  80.151  79.273  0.00  0.00      MON1  
ATOM    869  HE1 TYR M  60      68.676  80.570  80.097  0.00  0.00      MON1  
ATOM    870  CZ  TYR M  60      68.606  79.939  78.039  0.00  0.00      MON1  
ATOM    871  OH  TYR M  60      67.246  80.228  77.868  0.00  0.00      MON1  
ATOM    872  HH  TYR M  60      66.797  80.065  78.705  0.00  0.00      MON1  
ATOM    873  CD2 TYR M  60      70.675  79.046  77.146  0.00  0.00      MON1  
ATOM    874  HD2 TYR M  60      71.218  78.599  76.328  0.00  0.00      MON1  
ATOM    875  CE2 TYR M  60      69.327  79.389  76.976  0.00  0.00      MON1  
ATOM    876  HE2 TYR M  60      68.828  79.205  76.040  0.00  0.00      MON1  
ATOM    877  C   TYR M  60      75.004  79.060  79.613  0.00  0.00      MON1  
ATOM    878  O   TYR M  60      75.197  78.460  80.668  0.00  0.00      MON1  
ATOM    879  N   ALA M  61      75.969  79.122  78.671  0.00  0.00      MON1  
ATOM    880  HN  ALA M  61      75.792  79.547  77.776  0.00  0.00      MON1  
ATOM    881  CA  ALA M  61      77.285  78.554  78.855  0.00  0.00      MON1  
ATOM    882  HA  ALA M  61      77.168  77.516  79.139  0.00  0.00      MON1  
ATOM    883  CB  ALA M  61      78.145  78.643  77.583  0.00  0.00      MON1  
ATOM    884  HB1 ALA M  61      78.286  79.700  77.271  0.00  0.00      MON1  
ATOM    885  HB2 ALA M  61      77.636  78.110  76.751  0.00  0.00      MON1  
ATOM    886  HB3 ALA M  61      79.142  78.177  77.736  0.00  0.00      MON1  
ATOM    887  C   ALA M  61      78.027  79.235  79.963  0.00  0.00      MON1  
ATOM    888  O   ALA M  61      78.661  78.589  80.794  0.00  0.00      MON1  
ATOM    889  N   TRP M  62      77.943  80.578  80.028  0.00  0.00      MON1  
ATOM    890  HN  TRP M  62      77.472  81.102  79.311  0.00  0.00      MON1  
ATOM    891  CA  TRP M  62      78.591  81.310  81.087  0.00  0.00      MON1  
ATOM    892  HA  TRP M  62      79.635  81.026  81.087  0.00  0.00      MON1  
ATOM    893  CB  TRP M  62      78.466  82.842  80.932  0.00  0.00      MON1  
ATOM    894  HB1 TRP M  62      78.732  83.359  81.878  0.00  0.00      MON1  
ATOM    895  HB2 TRP M  62      77.409  83.097  80.694  0.00  0.00      MON1  
ATOM    896  CG  TRP M  62      79.359  83.380  79.866  0.00  0.00      MON1  
ATOM    897  CD1 TRP M  62      79.040  83.958  78.669  0.00  0.00      MON1  
ATOM    898  HD1 TRP M  62      78.029  84.178  78.348  0.00  0.00      MON1  
ATOM    899  NE1 TRP M  62      80.192  84.265  77.983  0.00  0.00      MON1  
ATOM    900  HE1 TRP M  62      80.262  84.637  77.084  0.00  0.00      MON1  
ATOM    901  CE2 TRP M  62      81.271  83.908  78.737  0.00  0.00      MON1  
ATOM    902  CD2 TRP M  62      80.784  83.347  79.938  0.00  0.00      MON1  
ATOM    903  CE3 TRP M  62      81.671  82.893  80.909  0.00  0.00      MON1  
ATOM    904  HE3 TRP M  62      81.324  82.432  81.820  0.00  0.00      MON1  
ATOM    905  CZ3 TRP M  62      83.034  83.020  80.666  0.00  0.00      MON1  
ATOM    906  HZ3 TRP M  62      83.750  82.671  81.401  0.00  0.00      MON1  
ATOM    907  CZ2 TRP M  62      82.624  84.033  78.494  0.00  0.00      MON1  
ATOM    908  HZ2 TRP M  62      82.998  84.477  77.585  0.00  0.00      MON1  
ATOM    909  CH2 TRP M  62      83.499  83.588  79.484  0.00  0.00      MON1  
ATOM    910  HH2 TRP M  62      84.560  83.722  79.338  0.00  0.00      MON1  
ATOM    911  C   TRP M  62      78.062  80.900  82.425  0.00  0.00      MON1  
ATOM    912  O   TRP M  62      78.821  80.729  83.379  0.00  0.00      MON1  
ATOM    913  N   GLN M  63      76.736  80.701  82.493  0.00  0.00      MON1  
ATOM    914  HN  GLN M  63      76.160  80.868  81.690  0.00  0.00      MON1  
ATOM    915  CA  GLN M  63      76.079  80.219  83.672  0.00  0.00      MON1  
ATOM    916  HA  GLN M  63      76.420  80.842  84.474  0.00  0.00      MON1  
ATOM    917  CB  GLN M  63      74.540  80.218  83.562  0.00  0.00      MON1  
ATOM    918  HB1 GLN M  63      74.085  79.630  84.395  0.00  0.00      MON1  
ATOM    919  HB2 GLN M  63      74.249  79.715  82.613  0.00  0.00      MON1  
ATOM    920  CG  GLN M  63      73.928  81.627  83.591  0.00  0.00      MON1  
ATOM    921  HG1 GLN M  63      72.855  81.559  83.315  0.00  0.00      MON1  
ATOM    922  HG2 GLN M  63      74.435  82.292  82.861  0.00  0.00      MON1  
ATOM    923  CD  GLN M  63      74.083  82.219  84.989  0.00  0.00      MON1  
ATOM    924  OE1 GLN M  63      75.107  82.107  85.660  0.00  0.00      MON1  
ATOM    925  NE2 GLN M  63      73.021  82.897  85.476  0.00  0.00      MON1  
ATOM    926 HE21 GLN M  63      73.116  83.259  86.399  0.00  0.00      MON1  
ATOM    927 HE22 GLN M  63      72.298  83.182  84.856  0.00  0.00      MON1  
ATOM    928  C   GLN M  63      76.521  78.874  84.092  0.00  0.00      MON1  
ATOM    929  O   GLN M  63      76.600  78.629  85.280  0.00  0.00      MON1  
ATOM    930  N   TYR M  64      76.842  77.963  83.161  0.00  0.00      MON1  
ATOM    931  HN  TYR M  64      76.743  78.148  82.183  0.00  0.00      MON1  
ATOM    932  CA  TYR M  64      77.273  76.657  83.585  0.00  0.00      MON1  
ATOM    933  HA  TYR M  64      76.479  76.208  84.170  0.00  0.00      MON1  
ATOM    934  CB  TYR M  64      77.624  75.752  82.377  0.00  0.00      MON1  
ATOM    935  HB1 TYR M  64      78.389  76.220  81.724  0.00  0.00      MON1  
ATOM    936  HB2 TYR M  64      76.715  75.554  81.769  0.00  0.00      MON1  
ATOM    937  CG  TYR M  64      78.156  74.463  82.913  0.00  0.00      MON1  
ATOM    938  CD1 TYR M  64      77.256  73.493  83.353  0.00  0.00      MON1  
ATOM    939  HD1 TYR M  64      76.194  73.630  83.204  0.00  0.00      MON1  
ATOM    940  CE1 TYR M  64      77.723  72.407  84.070  0.00  0.00      MON1  
ATOM    941  HE1 TYR M  64      77.024  71.706  84.504  0.00  0.00      MON1  
ATOM    942  CZ  TYR M  64      79.080  72.358  84.398  0.00  0.00      MON1  
ATOM    943  OH  TYR M  64      79.572  71.383  85.269  0.00  0.00      MON1  
ATOM    944  HH  TYR M  64      78.883  71.092  85.891  0.00  0.00      MON1  
ATOM    945  CD2 TYR M  64      79.538  74.297  83.115  0.00  0.00      MON1  
ATOM    946  HD2 TYR M  64      80.230  75.048  82.763  0.00  0.00      MON1  
ATOM    947  CE2 TYR M  64      80.011  73.203  83.820  0.00  0.00      MON1  
ATOM    948  HE2 TYR M  64      81.063  73.092  84.044  0.00  0.00      MON1  
ATOM    949  C   TYR M  64      78.485  76.739  84.491  0.00  0.00      MON1  
ATOM    950  O   TYR M  64      78.528  76.119  85.546  0.00  0.00      MON1  
ATOM    951  N   TRP M  65      79.505  77.503  84.068  0.00  0.00      MON1  
ATOM    952  HN  TRP M  65      79.445  77.989  83.199  0.00  0.00      MON1  
ATOM    953  CA  TRP M  65      80.672  77.662  84.893  0.00  0.00      MON1  
ATOM    954  HA  TRP M  65      80.983  76.684  85.243  0.00  0.00      MON1  
ATOM    955  CB  TRP M  65      81.829  78.285  84.086  0.00  0.00      MON1  
ATOM    956  HB1 TRP M  65      81.478  79.224  83.605  0.00  0.00      MON1  
ATOM    957  HB2 TRP M  65      82.084  77.582  83.262  0.00  0.00      MON1  
ATOM    958  CG  TRP M  65      83.071  78.554  84.873  0.00  0.00      MON1  
ATOM    959  CD1 TRP M  65      83.937  77.656  85.422  0.00  0.00      MON1  
ATOM    960  HD1 TRP M  65      83.863  76.577  85.345  0.00  0.00      MON1  
ATOM    961  NE1 TRP M  65      84.971  78.335  86.017  0.00  0.00      MON1  
ATOM    962  HE1 TRP M  65      85.850  77.877  86.120  0.00  0.00      MON1  
ATOM    963  CE2 TRP M  65      84.789  79.669  85.874  0.00  0.00      MON1  
ATOM    964  CD2 TRP M  65      83.581  79.852  85.173  0.00  0.00      MON1  
ATOM    965  CE3 TRP M  65      83.128  81.133  84.880  0.00  0.00      MON1  
ATOM    966  HE3 TRP M  65      82.217  81.277  84.322  0.00  0.00      MON1  
ATOM    967  CZ3 TRP M  65      83.897  82.216  85.296  0.00  0.00      MON1  
ATOM    968  HZ3 TRP M  65      83.593  83.222  85.049  0.00  0.00      MON1  
ATOM    969  CZ2 TRP M  65      85.553  80.742  86.272  0.00  0.00      MON1  
ATOM    970  HZ2 TRP M  65      86.503  80.592  86.735  0.00  0.00      MON1  
ATOM    971  CH2 TRP M  65      85.093  82.024  85.981  0.00  0.00      MON1  
ATOM    972  HH2 TRP M  65      85.697  82.875  86.268  0.00  0.00      MON1  
ATOM    973  C   TRP M  65      80.385  78.481  86.129  0.00  0.00      MON1  
ATOM    974  O   TRP M  65      80.778  78.126  87.237  0.00  0.00      MON1  
ATOM    975  N   LYS M  66      79.696  79.624  85.936  0.00  0.00      MON1  
ATOM    976  HN  LYS M  66      79.333  79.834  85.026  0.00  0.00      MON1  
ATOM    977  CA  LYS M  66      79.427  80.571  86.991  0.00  0.00      MON1  
ATOM    978  HA  LYS M  66      80.370  80.794  87.472  0.00  0.00      MON1  
ATOM    979  CB  LYS M  66      78.837  81.872  86.409  0.00  0.00      MON1  
ATOM    980  HB1 LYS M  66      77.859  81.649  85.922  0.00  0.00      MON1  
ATOM    981  HB2 LYS M  66      79.530  82.197  85.606  0.00  0.00      MON1  
ATOM    982  CG  LYS M  66      78.642  82.988  87.444  0.00  0.00      MON1  
ATOM    983  HG1 LYS M  66      79.522  83.067  88.120  0.00  0.00      MON1  
ATOM    984  HG2 LYS M  66      77.769  82.706  88.083  0.00  0.00      MON1  
ATOM    985  CD  LYS M  66      78.330  84.339  86.785  0.00  0.00      MON1  
ATOM    986  HD1 LYS M  66      77.587  84.870  87.412  0.00  0.00      MON1  
ATOM    987  HD2 LYS M  66      77.778  84.162  85.834  0.00  0.00      MON1  
ATOM    988  CE  LYS M  66      79.557  85.230  86.573  0.00  0.00      MON1  
ATOM    989  HE1 LYS M  66      80.250  85.152  87.436  0.00  0.00      MON1  
ATOM    990  HE2 LYS M  66      79.239  86.289  86.445  0.00  0.00      MON1  
ATOM    991  NZ  LYS M  66      80.259  84.814  85.340  0.00  0.00      MON1  
ATOM    992  HZ1 LYS M  66      79.582  84.835  84.550  0.00  0.00      MON1  
ATOM    993  HZ2 LYS M  66      80.593  83.835  85.465  0.00  0.00      MON1  
ATOM    994  HZ3 LYS M  66      81.058  85.440  85.125  0.00  0.00      MON1  
ATOM    995  C   LYS M  66      78.515  80.048  88.077  0.00  0.00      MON1  
ATOM    996  O   LYS M  66      78.756  80.277  89.262  0.00  0.00      MON1  
ATOM    997  N   ALA M  67      77.440  79.350  87.701  0.00  0.00      MON1  
ATOM    998  HN  ALA M  67      77.299  79.063  86.745  0.00  0.00      MON1  
ATOM    999  CA  ALA M  67      76.430  78.893  88.617  0.00  0.00      MON1  
ATOM   1000  HA  ALA M  67      76.911  78.560  89.527  0.00  0.00      MON1  
ATOM   1001  CB  ALA M  67      75.391  79.998  88.916  0.00  0.00      MON1  
ATOM   1002  HB1 ALA M  67      74.838  80.278  87.992  0.00  0.00      MON1  
ATOM   1003  HB2 ALA M  67      75.927  80.905  89.270  0.00  0.00      MON1  
ATOM   1004  HB3 ALA M  67      74.679  79.698  89.711  0.00  0.00      MON1  
ATOM   1005  C   ALA M  67      75.731  77.686  88.036  0.00  0.00      MON1  
ATOM   1006  O   ALA M  67      76.326  76.858  87.358  0.00  0.00      MON1  
ATOM   1007  N   THR M  68      74.426  77.534  88.316  0.00  0.00      MON1  
ATOM   1008  HN  THR M  68      73.930  78.245  88.799  0.00  0.00      MON1  
ATOM   1009  CA  THR M  68      73.665  76.398  87.837  0.00  0.00      MON1  
ATOM   1010  HA  THR M  68      74.338  75.620  87.499  0.00  0.00      MON1  
ATOM   1011  CB  THR M  68      72.753  75.803  88.882  0.00  0.00      MON1  
ATOM   1012  HB  THR M  68      73.381  75.650  89.777  0.00  0.00      MON1  
ATOM   1013  OG1 THR M  68      72.284  74.523  88.485  0.00  0.00      MON1  
ATOM   1014  HG1 THR M  68      71.616  74.275  89.133  0.00  0.00      MON1  
ATOM   1015  CG2 THR M  68      71.541  76.716  89.158  0.00  0.00      MON1  
ATOM   1016 HG21 THR M  68      70.815  76.714  88.317  0.00  0.00      MON1  
ATOM   1017 HG22 THR M  68      71.858  77.762  89.349  0.00  0.00      MON1  
ATOM   1018 HG23 THR M  68      70.992  76.356  90.055  0.00  0.00      MON1  
ATOM   1019  C   THR M  68      72.813  76.809  86.674  0.00  0.00      MON1  
ATOM   1020  O   THR M  68      72.310  77.932  86.600  0.00  0.00      MON1  
ATOM   1021  N   CYS M  69      72.630  75.888  85.723  0.00  0.00      MON1  
ATOM   1022  HN  CYS M  69      73.033  74.977  85.795  0.00  0.00      MON1  
ATOM   1023  CA  CYS M  69      71.752  76.107  84.608  0.00  0.00      MON1  
ATOM   1024  HA  CYS M  69      70.892  76.684  84.927  0.00  0.00      MON1  
ATOM   1025  CB  CYS M  69      72.466  76.807  83.431  0.00  0.00      MON1  
ATOM   1026  HB1 CYS M  69      73.320  76.184  83.085  0.00  0.00      MON1  
ATOM   1027  HB2 CYS M  69      72.900  77.752  83.823  0.00  0.00      MON1  
ATOM   1028  SG  CYS M  69      71.345  77.193  82.042  0.00  0.00      MON1  
ATOM   1029  HG1 CYS M  69      71.001  75.939  81.743  0.00  0.00      MON1  
ATOM   1030  C   CYS M  69      71.266  74.763  84.153  0.00  0.00      MON1  
ATOM   1031  O   CYS M  69      72.022  73.791  84.135  0.00  0.00      MON1  
ATOM   1032  N   GLY M  70      69.978  74.684  83.773  0.00  0.00      MON1  
ATOM   1033  HN  GLY M  70      69.407  75.503  83.698  0.00  0.00      MON1  
ATOM   1034  CA  GLY M  70      69.389  73.467  83.268  0.00  0.00      MON1  
ATOM   1035  HA1 GLY M  70      68.330  73.639  83.146  0.00  0.00      MON1  
ATOM   1036  HA2 GLY M  70      69.613  72.659  83.949  0.00  0.00      MON1  
ATOM   1037  C   GLY M  70      69.920  73.118  81.914  0.00  0.00      MON1  
ATOM   1038  O   GLY M  70      70.228  73.968  81.078  0.00  0.00      MON1  
ATOM   1039  N   TRP M  71      70.021  71.806  81.675  0.00  0.00      MON1  
ATOM   1040  HN  TRP M  71      69.661  71.165  82.342  0.00  0.00      MON1  
ATOM   1041  CA  TRP M  71      70.469  71.232  80.435  0.00  0.00      MON1  
ATOM   1042  HA  TRP M  71      71.381  71.726  80.128  0.00  0.00      MON1  
ATOM   1043  CB  TRP M  71      70.710  69.713  80.623  0.00  0.00      MON1  
ATOM   1044  HB1 TRP M  71      71.514  69.595  81.383  0.00  0.00      MON1  
ATOM   1045  HB2 TRP M  71      71.089  69.265  79.678  0.00  0.00      MON1  
ATOM   1046  CG  TRP M  71      69.500  68.960  81.084  0.00  0.00      MON1  
ATOM   1047  CD1 TRP M  71      69.052  68.773  82.363  0.00  0.00      MON1  
ATOM   1048  HD1 TRP M  71      69.535  69.160  83.251  0.00  0.00      MON1  
ATOM   1049  NE1 TRP M  71      67.850  68.103  82.337  0.00  0.00      MON1  
ATOM   1050  HE1 TRP M  71      67.077  68.383  82.880  0.00  0.00      MON1  
ATOM   1051  CE2 TRP M  71      67.536  67.814  81.042  0.00  0.00      MON1  
ATOM   1052  CD2 TRP M  71      68.540  68.353  80.218  0.00  0.00      MON1  
ATOM   1053  CE3 TRP M  71      68.449  68.242  78.835  0.00  0.00      MON1  
ATOM   1054  HE3 TRP M  71      69.194  68.676  78.186  0.00  0.00      MON1  
ATOM   1055  CZ3 TRP M  71      67.350  67.586  78.299  0.00  0.00      MON1  
ATOM   1056  HZ3 TRP M  71      67.235  67.553  77.224  0.00  0.00      MON1  
ATOM   1057  CZ2 TRP M  71      66.440  67.183  80.505  0.00  0.00      MON1  
ATOM   1058  HZ2 TRP M  71      65.630  66.879  81.138  0.00  0.00      MON1  
ATOM   1059  CH2 TRP M  71      66.365  67.048  79.116  0.00  0.00      MON1  
ATOM   1060  HH2 TRP M  71      65.497  66.586  78.665  0.00  0.00      MON1  
ATOM   1061  C   TRP M  71      69.446  71.443  79.344  0.00  0.00      MON1  
ATOM   1062  O   TRP M  71      69.807  71.518  78.170  0.00  0.00      MON1  
ATOM   1063  N   GLU M  72      68.142  71.530  79.697  0.00  0.00      MON1  
ATOM   1064  HN  GLU M  72      67.814  71.521  80.654  0.00  0.00      MON1  
ATOM   1065  CA  GLU M  72      67.072  71.630  78.732  0.00  0.00      MON1  
ATOM   1066  HA  GLU M  72      67.115  70.765  78.088  0.00  0.00      MON1  
ATOM   1067  CB  GLU M  72      65.669  71.742  79.378  0.00  0.00      MON1  
ATOM   1068  HB1 GLU M  72      64.914  71.867  78.567  0.00  0.00      MON1  
ATOM   1069  HB2 GLU M  72      65.591  72.661  80.007  0.00  0.00      MON1  
ATOM   1070  CG  GLU M  72      65.228  70.506  80.184  0.00  0.00      MON1  
ATOM   1071  HG1 GLU M  72      65.642  69.585  79.742  0.00  0.00      MON1  
ATOM   1072  HG2 GLU M  72      64.123  70.421  80.183  0.00  0.00      MON1  
ATOM   1073  CD  GLU M  72      65.665  70.617  81.636  0.00  0.00      MON1  
ATOM   1074  OE1 GLU M  72      66.527  71.475  81.961  0.00  0.00      MON1  
ATOM   1075  OE2 GLU M  72      65.125  69.856  82.480  0.00  0.00      MON1  
ATOM   1076  C   GLU M  72      67.209  72.855  77.876  0.00  0.00      MON1  
ATOM   1077  O   GLU M  72      67.129  72.770  76.652  0.00  0.00      MON1  
ATOM   1078  N   GLU M  73      67.464  74.017  78.519  0.00  0.00      MON1  
ATOM   1079  HN  GLU M  73      67.470  74.061  79.530  0.00  0.00      MON1  
ATOM   1080  CA  GLU M  73      67.653  75.297  77.872  0.00  0.00      MON1  
ATOM   1081  HA  GLU M  73      66.755  75.529  77.318  0.00  0.00      MON1  
ATOM   1082  CB  GLU M  73      67.907  76.411  78.929  0.00  0.00      MON1  
ATOM   1083  HB1 GLU M  73      68.126  77.347  78.372  0.00  0.00      MON1  
ATOM   1084  HB2 GLU M  73      68.807  76.172  79.538  0.00  0.00      MON1  
ATOM   1085  CG  GLU M  73      66.704  76.729  79.863  0.00  0.00      MON1  
ATOM   1086  HG1 GLU M  73      65.755  76.399  79.395  0.00  0.00      MON1  
ATOM   1087  HG2 GLU M  73      66.647  77.825  80.017  0.00  0.00      MON1  
ATOM   1088  CD  GLU M  73      66.780  76.095  81.258  0.00  0.00      MON1  
ATOM   1089  OE1 GLU M  73      67.293  74.956  81.373  0.00  0.00      MON1  
ATOM   1090  OE2 GLU M  73      66.277  76.731  82.223  0.00  0.00      MON1  
ATOM   1091  C   GLU M  73      68.803  75.273  76.874  0.00  0.00      MON1  
ATOM   1092  O   GLU M  73      68.695  75.779  75.756  0.00  0.00      MON1  
ATOM   1093  N   VAL M  74      69.937  74.648  77.255  0.00  0.00      MON1  
ATOM   1094  HN  VAL M  74      69.989  74.253  78.171  0.00  0.00      MON1  
ATOM   1095  CA  VAL M  74      71.093  74.523  76.392  0.00  0.00      MON1  
ATOM   1096  HA  VAL M  74      71.299  75.493  75.961  0.00  0.00      MON1  
ATOM   1097  CB  VAL M  74      72.327  74.048  77.132  0.00  0.00      MON1  
ATOM   1098  HB  VAL M  74      72.142  73.055  77.608  0.00  0.00      MON1  
ATOM   1099  CG1 VAL M  74      73.506  73.921  76.141  0.00  0.00      MON1  
ATOM   1100 HG11 VAL M  74      73.607  74.839  75.525  0.00  0.00      MON1  
ATOM   1101 HG12 VAL M  74      73.392  73.041  75.476  0.00  0.00      MON1  
ATOM   1102 HG13 VAL M  74      74.453  73.781  76.706  0.00  0.00      MON1  
ATOM   1103  CG2 VAL M  74      72.642  75.054  78.251  0.00  0.00      MON1  
ATOM   1104 HG21 VAL M  74      71.825  75.108  79.002  0.00  0.00      MON1  
ATOM   1105 HG22 VAL M  74      72.796  76.064  77.818  0.00  0.00      MON1  
ATOM   1106 HG23 VAL M  74      73.570  74.759  78.784  0.00  0.00      MON1  
ATOM   1107  C   VAL M  74      70.850  73.581  75.256  0.00  0.00      MON1  
ATOM   1108  O   VAL M  74      71.188  73.868  74.113  0.00  0.00      MON1  
ATOM   1109  N   TYR M  75      70.250  72.415  75.543  0.00  0.00      MON1  
ATOM   1110  HN  TYR M  75      69.972  72.200  76.486  0.00  0.00      MON1  
ATOM   1111  CA  TYR M  75      70.040  71.397  74.549  0.00  0.00      MON1  
ATOM   1112  HA  TYR M  75      70.998  71.154  74.110  0.00  0.00      MON1  
ATOM   1113  CB  TYR M  75      69.414  70.146  75.202  0.00  0.00      MON1  
ATOM   1114  HB1 TYR M  75      68.433  70.384  75.669  0.00  0.00      MON1  
ATOM   1115  HB2 TYR M  75      70.086  69.769  76.004  0.00  0.00      MON1  
ATOM   1116  CG  TYR M  75      69.253  69.062  74.184  0.00  0.00      MON1  
ATOM   1117  CD1 TYR M  75      70.380  68.414  73.671  0.00  0.00      MON1  
ATOM   1118  HD1 TYR M  75      71.364  68.685  74.025  0.00  0.00      MON1  
ATOM   1119  CE1 TYR M  75      70.242  67.422  72.696  0.00  0.00      MON1  
ATOM   1120  HE1 TYR M  75      71.113  66.924  72.294  0.00  0.00      MON1  
ATOM   1121  CZ  TYR M  75      68.974  67.076  72.228  0.00  0.00      MON1  
ATOM   1122  OH  TYR M  75      68.841  66.065  71.255  0.00  0.00      MON1  
ATOM   1123  HH  TYR M  75      67.949  65.685  71.323  0.00  0.00      MON1  
ATOM   1124  CD2 TYR M  75      67.988  68.709  73.718  0.00  0.00      MON1  
ATOM   1125  HD2 TYR M  75      67.137  69.252  74.094  0.00  0.00      MON1  
ATOM   1126  CE2 TYR M  75      67.841  67.702  72.761  0.00  0.00      MON1  
ATOM   1127  HE2 TYR M  75      66.861  67.428  72.402  0.00  0.00      MON1  
ATOM   1128  C   TYR M  75      69.150  71.901  73.432  0.00  0.00      MON1  
ATOM   1129  O   TYR M  75      69.478  71.754  72.256  0.00  0.00      MON1  
ATOM   1130  N   VAL M  76      68.026  72.558  73.803  0.00  0.00      MON1  
ATOM   1131  HN  VAL M  76      67.808  72.654  74.780  0.00  0.00      MON1  
ATOM   1132  CA  VAL M  76      67.083  73.185  72.884  0.00  0.00      MON1  
ATOM   1133  HA  VAL M  76      66.721  72.429  72.202  0.00  0.00      MON1  
ATOM   1134  CB  VAL M  76      65.896  73.777  73.645  0.00  0.00      MON1  
ATOM   1135  HB  VAL M  76      66.278  74.347  74.528  0.00  0.00      MON1  
ATOM   1136  CG1 VAL M  76      65.044  74.727  72.780  0.00  0.00      MON1  
ATOM   1137 HG11 VAL M  76      64.726  74.219  71.847  0.00  0.00      MON1  
ATOM   1138 HG12 VAL M  76      65.597  75.654  72.519  0.00  0.00      MON1  
ATOM   1139 HG13 VAL M  76      64.138  75.029  73.348  0.00  0.00      MON1  
ATOM   1140  CG2 VAL M  76      65.023  72.616  74.152  0.00  0.00      MON1  
ATOM   1141 HG21 VAL M  76      65.625  71.915  74.763  0.00  0.00      MON1  
ATOM   1142 HG22 VAL M  76      64.576  72.052  73.308  0.00  0.00      MON1  
ATOM   1143 HG23 VAL M  76      64.203  73.004  74.794  0.00  0.00      MON1  
ATOM   1144  C   VAL M  76      67.762  74.244  72.037  0.00  0.00      MON1  
ATOM   1145  O   VAL M  76      67.687  74.210  70.812  0.00  0.00      MON1  
ATOM   1146  N   CYS M  77      68.524  75.162  72.662  0.00  0.00      MON1  
ATOM   1147  HN  CYS M  77      68.576  75.191  73.663  0.00  0.00      MON1  
ATOM   1148  CA  CYS M  77      69.257  76.191  71.953  0.00  0.00      MON1  
ATOM   1149  HA  CYS M  77      68.574  76.632  71.243  0.00  0.00      MON1  
ATOM   1150  CB  CYS M  77      69.656  77.370  72.873  0.00  0.00      MON1  
ATOM   1151  HB1 CYS M  77      70.401  78.017  72.362  0.00  0.00      MON1  
ATOM   1152  HB2 CYS M  77      70.131  76.952  73.788  0.00  0.00      MON1  
ATOM   1153  SG  CYS M  77      68.212  78.393  73.332  0.00  0.00      MON1  
ATOM   1154  HG1 CYS M  77      68.062  78.992  72.158  0.00  0.00      MON1  
ATOM   1155  C   CYS M  77      70.417  75.674  71.091  0.00  0.00      MON1  
ATOM   1156  O   CYS M  77      70.758  76.295  70.086  0.00  0.00      MON1  
ATOM   1157  N   CYS M  78      71.043  74.519  71.420  0.00  0.00      MON1  
ATOM   1158  HN  CYS M  78      70.839  74.071  72.295  0.00  0.00      MON1  
ATOM   1159  CA  CYS M  78      72.025  73.877  70.559  0.00  0.00      MON1  
ATOM   1160  HA  CYS M  78      72.745  74.622  70.248  0.00  0.00      MON1  
ATOM   1161  CB  CYS M  78      72.775  72.718  71.255  0.00  0.00      MON1  
ATOM   1162  HB1 CYS M  78      73.435  72.207  70.519  0.00  0.00      MON1  
ATOM   1163  HB2 CYS M  78      72.038  71.967  71.619  0.00  0.00      MON1  
ATOM   1164  SG  CYS M  78      73.796  73.292  72.641  0.00  0.00      MON1  
ATOM   1165  HG1 CYS M  78      72.788  73.723  73.386  0.00  0.00      MON1  
ATOM   1166  C   CYS M  78      71.384  73.345  69.299  0.00  0.00      MON1  
ATOM   1167  O   CYS M  78      71.887  73.567  68.204  0.00  0.00      MON1  
ATOM   1168  N   ILE M  79      70.210  72.673  69.424  0.00  0.00      MON1  
ATOM   1169  HN  ILE M  79      69.848  72.489  70.341  0.00  0.00      MON1  
ATOM   1170  CA  ILE M  79      69.358  72.238  68.310  0.00  0.00      MON1  
ATOM   1171  HA  ILE M  79      69.953  71.606  67.667  0.00  0.00      MON1  
ATOM   1172  CB  ILE M  79      68.130  71.458  68.760  0.00  0.00      MON1  
ATOM   1173  HB  ILE M  79      67.569  72.066  69.509  0.00  0.00      MON1  
ATOM   1174  CG2 ILE M  79      67.195  71.163  67.563  0.00  0.00      MON1  
ATOM   1175 HG21 ILE M  79      67.765  70.691  66.734  0.00  0.00      MON1  
ATOM   1176 HG22 ILE M  79      66.721  72.093  67.188  0.00  0.00      MON1  
ATOM   1177 HG23 ILE M  79      66.376  70.473  67.847  0.00  0.00      MON1  
ATOM   1178  CG1 ILE M  79      68.520  70.141  69.439  0.00  0.00      MON1  
ATOM   1179 HG11 ILE M  79      69.404  70.268  70.103  0.00  0.00      MON1  
ATOM   1180 HG12 ILE M  79      68.798  69.398  68.657  0.00  0.00      MON1  
ATOM   1181  CD  ILE M  79      67.362  69.612  70.280  0.00  0.00      MON1  
ATOM   1182  HD1 ILE M  79      66.389  69.694  69.761  0.00  0.00      MON1  
ATOM   1183  HD2 ILE M  79      67.296  70.161  71.244  0.00  0.00      MON1  
ATOM   1184  HD3 ILE M  79      67.539  68.541  70.480  0.00  0.00      MON1  
ATOM   1185  C   ILE M  79      68.885  73.398  67.455  0.00  0.00      MON1  
ATOM   1186  O   ILE M  79      69.040  73.359  66.235  0.00  0.00      MON1  
ATOM   1187  N   GLU M  80      68.384  74.490  68.082  0.00  0.00      MON1  
ATOM   1188  HN  GLU M  80      68.221  74.465  69.074  0.00  0.00      MON1  
ATOM   1189  CA  GLU M  80      68.025  75.734  67.415  0.00  0.00      MON1  
ATOM   1190  HA  GLU M  80      67.190  75.537  66.755  0.00  0.00      MON1  
ATOM   1191  CB  GLU M  80      67.740  76.897  68.419  0.00  0.00      MON1  
ATOM   1192  HB1 GLU M  80      67.690  77.873  67.881  0.00  0.00      MON1  
ATOM   1193  HB2 GLU M  80      68.614  76.967  69.099  0.00  0.00      MON1  
ATOM   1194  CG  GLU M  80      66.476  76.747  69.293  0.00  0.00      MON1  
ATOM   1195  HG1 GLU M  80      66.679  77.128  70.317  0.00  0.00      MON1  
ATOM   1196  HG2 GLU M  80      66.185  75.682  69.369  0.00  0.00      MON1  
ATOM   1197  CD  GLU M  80      65.315  77.548  68.738  0.00  0.00      MON1  
ATOM   1198  OE1 GLU M  80      64.838  77.184  67.636  0.00  0.00      MON1  
ATOM   1199  OE2 GLU M  80      64.848  78.500  69.415  0.00  0.00      MON1  
ATOM   1200  C   GLU M  80      69.169  76.258  66.555  0.00  0.00      MON1  
ATOM   1201  O   GLU M  80      68.934  76.762  65.459  0.00  0.00      MON1  
ATOM   1202  N   LEU M  81      70.434  76.145  67.028  0.00  0.00      MON1  
ATOM   1203  HN  LEU M  81      70.604  75.793  67.948  0.00  0.00      MON1  
ATOM   1204  CA  LEU M  81      71.580  76.595  66.274  0.00  0.00      MON1  
ATOM   1205  HA  LEU M  81      71.356  77.572  65.874  0.00  0.00      MON1  
ATOM   1206  CB  LEU M  81      72.861  76.659  67.129  0.00  0.00      MON1  
ATOM   1207  HB1 LEU M  81      73.102  75.652  67.533  0.00  0.00      MON1  
ATOM   1208  HB2 LEU M  81      72.676  77.318  68.006  0.00  0.00      MON1  
ATOM   1209  CG  LEU M  81      74.088  77.193  66.354  0.00  0.00      MON1  
ATOM   1210  HG  LEU M  81      74.219  76.646  65.391  0.00  0.00      MON1  
ATOM   1211  CD1 LEU M  81      73.916  78.680  66.022  0.00  0.00      MON1  
ATOM   1212 HD11 LEU M  81      73.819  79.259  66.961  0.00  0.00      MON1  
ATOM   1213 HD12 LEU M  81      73.017  78.854  65.396  0.00  0.00      MON1  
ATOM   1214 HD13 LEU M  81      74.802  79.059  65.470  0.00  0.00      MON1  
ATOM   1215  CD2 LEU M  81      75.386  76.929  67.125  0.00  0.00      MON1  
ATOM   1216 HD21 LEU M  81      75.515  75.841  67.310  0.00  0.00      MON1  
ATOM   1217 HD22 LEU M  81      75.362  77.453  68.105  0.00  0.00      MON1  
ATOM   1218 HD23 LEU M  81      76.261  77.297  66.550  0.00  0.00      MON1  
ATOM   1219  C   LEU M  81      71.885  75.701  65.116  0.00  0.00      MON1  
ATOM   1220  O   LEU M  81      72.148  76.144  64.000  0.00  0.00      MON1  
ATOM   1221  N   VAL M  82      71.883  74.382  65.348  0.00  0.00      MON1  
ATOM   1222  HN  VAL M  82      71.703  74.019  66.266  0.00  0.00      MON1  
ATOM   1223  CA  VAL M  82      72.193  73.458  64.287  0.00  0.00      MON1  
ATOM   1224  HA  VAL M  82      73.154  73.719  63.864  0.00  0.00      MON1  
ATOM   1225  CB  VAL M  82      72.222  72.021  64.761  0.00  0.00      MON1  
ATOM   1226  HB  VAL M  82      71.248  71.747  65.232  0.00  0.00      MON1  
ATOM   1227  CG1 VAL M  82      72.491  71.095  63.554  0.00  0.00      MON1  
ATOM   1228 HG11 VAL M  82      73.400  71.423  63.008  0.00  0.00      MON1  
ATOM   1229 HG12 VAL M  82      71.639  71.061  62.845  0.00  0.00      MON1  
ATOM   1230 HG13 VAL M  82      72.663  70.057  63.912  0.00  0.00      MON1  
ATOM   1231  CG2 VAL M  82      73.326  71.861  65.821  0.00  0.00      MON1  
ATOM   1232 HG21 VAL M  82      73.232  72.573  66.656  0.00  0.00      MON1  
ATOM   1233 HG22 VAL M  82      74.322  72.025  65.356  0.00  0.00      MON1  
ATOM   1234 HG23 VAL M  82      73.308  70.832  66.240  0.00  0.00      MON1  
ATOM   1235  C   VAL M  82      71.171  73.577  63.194  0.00  0.00      MON1  
ATOM   1236  O   VAL M  82      71.497  73.685  62.021  0.00  0.00      MON1  
ATOM   1237  N   PHE M  83      69.887  73.617  63.574  0.00  0.00      MON1  
ATOM   1238  HN  PHE M  83      69.639  73.582  64.548  0.00  0.00      MON1  
ATOM   1239  CA  PHE M  83      68.809  73.651  62.628  0.00  0.00      MON1  
ATOM   1240  HA  PHE M  83      68.908  72.797  61.971  0.00  0.00      MON1  
ATOM   1241  CB  PHE M  83      67.447  73.512  63.393  0.00  0.00      MON1  
ATOM   1242  HB1 PHE M  83      67.481  74.132  64.316  0.00  0.00      MON1  
ATOM   1243  HB2 PHE M  83      67.336  72.450  63.690  0.00  0.00      MON1  
ATOM   1244  CG  PHE M  83      66.227  73.951  62.605  0.00  0.00      MON1  
ATOM   1245  CD1 PHE M  83      65.529  73.052  61.792  0.00  0.00      MON1  
ATOM   1246  HD1 PHE M  83      65.819  72.013  61.798  0.00  0.00      MON1  
ATOM   1247  CE1 PHE M  83      64.536  73.507  60.910  0.00  0.00      MON1  
ATOM   1248  HE1 PHE M  83      64.031  72.825  60.244  0.00  0.00      MON1  
ATOM   1249  CZ  PHE M  83      64.239  74.871  60.843  0.00  0.00      MON1  
ATOM   1250  HZ  PHE M  83      63.529  75.238  60.122  0.00  0.00      MON1  
ATOM   1251  CD2 PHE M  83      65.839  75.303  62.603  0.00  0.00      MON1  
ATOM   1252  HD2 PHE M  83      66.363  76.013  63.224  0.00  0.00      MON1  
ATOM   1253  CE2 PHE M  83      64.872  75.766  61.708  0.00  0.00      MON1  
ATOM   1254  HE2 PHE M  83      64.649  76.821  61.660  0.00  0.00      MON1  
ATOM   1255  C   PHE M  83      68.827  74.853  61.739  0.00  0.00      MON1  
ATOM   1256  O   PHE M  83      68.714  74.730  60.523  0.00  0.00      MON1  
ATOM   1257  N   ILE M  84      68.963  76.039  62.345  0.00  0.00      MON1  
ATOM   1258  HN  ILE M  84      69.027  76.130  63.340  0.00  0.00      MON1  
ATOM   1259  CA  ILE M  84      68.924  77.235  61.573  0.00  0.00      MON1  
ATOM   1260  HA  ILE M  84      67.991  77.256  61.022  0.00  0.00      MON1  
ATOM   1261  CB  ILE M  84      69.029  78.459  62.413  0.00  0.00      MON1  
ATOM   1262  HB  ILE M  84      68.173  78.461  63.133  0.00  0.00      MON1  
ATOM   1263  CG2 ILE M  84      70.350  78.503  63.215  0.00  0.00      MON1  
ATOM   1264 HG21 ILE M  84      71.237  78.722  62.591  0.00  0.00      MON1  
ATOM   1265 HG22 ILE M  84      70.466  77.554  63.749  0.00  0.00      MON1  
ATOM   1266 HG23 ILE M  84      70.314  79.268  64.015  0.00  0.00      MON1  
ATOM   1267  CG1 ILE M  84      68.902  79.621  61.465  0.00  0.00      MON1  
ATOM   1268 HG11 ILE M  84      67.999  79.504  60.813  0.00  0.00      MON1  
ATOM   1269 HG12 ILE M  84      69.807  79.686  60.812  0.00  0.00      MON1  
ATOM   1270  CD  ILE M  84      68.853  80.815  62.249  0.00  0.00      MON1  
ATOM   1271  HD1 ILE M  84      69.074  80.645  63.311  0.00  0.00      MON1  
ATOM   1272  HD2 ILE M  84      67.786  81.093  62.182  0.00  0.00      MON1  
ATOM   1273  HD3 ILE M  84      69.531  81.522  61.728  0.00  0.00      MON1  
ATOM   1274  C   ILE M  84      70.029  77.231  60.578  0.00  0.00      MON1  
ATOM   1275  O   ILE M  84      69.775  77.501  59.424  0.00  0.00      MON1  
ATOM   1276  N   CYS M  85      71.254  76.833  60.982  0.00  0.00      MON1  
ATOM   1277  HN  CYS M  85      71.397  76.554  61.931  0.00  0.00      MON1  
ATOM   1278  CA  CYS M  85      72.395  76.845  60.113  0.00  0.00      MON1  
ATOM   1279  HA  CYS M  85      72.525  77.845  59.724  0.00  0.00      MON1  
ATOM   1280  CB  CYS M  85      73.686  76.389  60.829  0.00  0.00      MON1  
ATOM   1281  HB1 CYS M  85      74.508  76.310  60.081  0.00  0.00      MON1  
ATOM   1282  HB2 CYS M  85      73.535  75.376  61.264  0.00  0.00      MON1  
ATOM   1283  SG  CYS M  85      74.205  77.543  62.135  0.00  0.00      MON1  
ATOM   1284  HG1 CYS M  85      73.305  77.147  63.029  0.00  0.00      MON1  
ATOM   1285  C   CYS M  85      72.151  75.943  58.948  0.00  0.00      MON1  
ATOM   1286  O   CYS M  85      72.298  76.346  57.809  0.00  0.00      MON1  
ATOM   1287  N   PHE M  86      71.669  74.716  59.180  0.00  0.00      MON1  
ATOM   1288  HN  PHE M  86      71.487  74.394  60.111  0.00  0.00      MON1  
ATOM   1289  CA  PHE M  86      71.370  73.828  58.080  0.00  0.00      MON1  
ATOM   1290  HA  PHE M  86      72.238  73.806  57.430  0.00  0.00      MON1  
ATOM   1291  CB  PHE M  86      71.044  72.397  58.536  0.00  0.00      MON1  
ATOM   1292  HB1 PHE M  86      70.477  71.821  57.771  0.00  0.00      MON1  
ATOM   1293  HB2 PHE M  86      70.462  72.402  59.484  0.00  0.00      MON1  
ATOM   1294  CG  PHE M  86      72.353  71.716  58.753  0.00  0.00      MON1  
ATOM   1295  CD1 PHE M  86      73.082  71.890  59.931  0.00  0.00      MON1  
ATOM   1296  HD1 PHE M  86      72.729  72.523  60.699  0.00  0.00      MON1  
ATOM   1297  CE1 PHE M  86      74.310  71.265  60.124  0.00  0.00      MON1  
ATOM   1298  HE1 PHE M  86      74.862  71.417  61.040  0.00  0.00      MON1  
ATOM   1299  CZ  PHE M  86      74.830  70.451  59.118  0.00  0.00      MON1  
ATOM   1300  HZ  PHE M  86      75.786  69.966  59.255  0.00  0.00      MON1  
ATOM   1301  CD2 PHE M  86      72.891  70.911  57.744  0.00  0.00      MON1  
ATOM   1302  HD2 PHE M  86      72.353  70.784  56.814  0.00  0.00      MON1  
ATOM   1303  CE2 PHE M  86      74.123  70.278  57.924  0.00  0.00      MON1  
ATOM   1304  HE2 PHE M  86      74.533  69.661  57.137  0.00  0.00      MON1  
ATOM   1305  C   PHE M  86      70.283  74.339  57.197  0.00  0.00      MON1  
ATOM   1306  O   PHE M  86      70.360  74.216  55.981  0.00  0.00      MON1  
ATOM   1307  N   GLU M  87      69.251  74.949  57.787  0.00  0.00      MON1  
ATOM   1308  HN  GLU M  87      69.188  75.033  58.786  0.00  0.00      MON1  
ATOM   1309  CA  GLU M  87      68.181  75.542  57.036  0.00  0.00      MON1  
ATOM   1310  HA  GLU M  87      67.725  74.788  56.410  0.00  0.00      MON1  
ATOM   1311  CB  GLU M  87      67.150  76.142  57.992  0.00  0.00      MON1  
ATOM   1312  HB1 GLU M  87      67.629  76.949  58.587  0.00  0.00      MON1  
ATOM   1313  HB2 GLU M  87      66.845  75.355  58.720  0.00  0.00      MON1  
ATOM   1314  CG  GLU M  87      65.897  76.689  57.300  0.00  0.00      MON1  
ATOM   1315  HG1 GLU M  87      65.343  75.830  56.878  0.00  0.00      MON1  
ATOM   1316  HG2 GLU M  87      66.132  77.342  56.451  0.00  0.00      MON1  
ATOM   1317  CD  GLU M  87      65.025  77.367  58.343  0.00  0.00      MON1  
ATOM   1318  OE1 GLU M  87      65.570  78.026  59.264  0.00  0.00      MON1  
ATOM   1319  OE2 GLU M  87      63.778  77.240  58.280  0.00  0.00      MON1  
ATOM   1320  C   GLU M  87      68.702  76.636  56.148  0.00  0.00      MON1  
ATOM   1321  O   GLU M  87      68.374  76.743  54.980  0.00  0.00      MON1  
ATOM   1322  N   LEU M  88      69.604  77.483  56.649  0.00  0.00      MON1  
ATOM   1323  HN  LEU M  88      69.863  77.454  57.618  0.00  0.00      MON1  
ATOM   1324  CA  LEU M  88      70.090  78.567  55.825  0.00  0.00      MON1  
ATOM   1325  HA  LEU M  88      69.247  79.157  55.487  0.00  0.00      MON1  
ATOM   1326  CB  LEU M  88      71.133  79.455  56.547  0.00  0.00      MON1  
ATOM   1327  HB1 LEU M  88      71.290  80.371  55.931  0.00  0.00      MON1  
ATOM   1328  HB2 LEU M  88      72.118  78.945  56.647  0.00  0.00      MON1  
ATOM   1329  CG  LEU M  88      70.720  79.888  57.941  0.00  0.00      MON1  
ATOM   1330  HG  LEU M  88      70.957  79.029  58.572  0.00  0.00      MON1  
ATOM   1331  CD1 LEU M  88      71.614  80.957  58.564  0.00  0.00      MON1  
ATOM   1332 HD11 LEU M  88      71.511  81.911  58.002  0.00  0.00      MON1  
ATOM   1333 HD12 LEU M  88      72.680  80.649  58.535  0.00  0.00      MON1  
ATOM   1334 HD13 LEU M  88      71.326  81.147  59.619  0.00  0.00      MON1  
ATOM   1335  CD2 LEU M  88      69.262  80.290  57.964  0.00  0.00      MON1  
ATOM   1336 HD21 LEU M  88      68.570  79.612  57.435  0.00  0.00      MON1  
ATOM   1337 HD22 LEU M  88      69.133  81.319  57.570  0.00  0.00      MON1  
ATOM   1338 HD23 LEU M  88      68.987  80.209  59.022  0.00  0.00      MON1  
ATOM   1339  C   LEU M  88      70.778  78.049  54.600  0.00  0.00      MON1  
ATOM   1340  O   LEU M  88      70.473  78.449  53.482  0.00  0.00      MON1  
ATOM   1341  N   TYR M  89      71.701  77.097  54.816  0.00  0.00      MON1  
ATOM   1342  HN  TYR M  89      71.861  76.770  55.747  0.00  0.00      MON1  
ATOM   1343  CA  TYR M  89      72.523  76.555  53.764  0.00  0.00      MON1  
ATOM   1344  HA  TYR M  89      72.793  77.371  53.105  0.00  0.00      MON1  
ATOM   1345  CB  TYR M  89      73.817  75.931  54.326  0.00  0.00      MON1  
ATOM   1346  HB1 TYR M  89      74.415  75.445  53.527  0.00  0.00      MON1  
ATOM   1347  HB2 TYR M  89      73.599  75.181  55.117  0.00  0.00      MON1  
ATOM   1348  CG  TYR M  89      74.644  77.042  54.879  0.00  0.00      MON1  
ATOM   1349  CD1 TYR M  89      75.488  77.784  54.048  0.00  0.00      MON1  
ATOM   1350  HD1 TYR M  89      75.551  77.549  52.996  0.00  0.00      MON1  
ATOM   1351  CE1 TYR M  89      76.256  78.828  54.577  0.00  0.00      MON1  
ATOM   1352  HE1 TYR M  89      76.921  79.394  53.940  0.00  0.00      MON1  
ATOM   1353  CZ  TYR M  89      76.161  79.150  55.935  0.00  0.00      MON1  
ATOM   1354  OH  TYR M  89      76.943  80.184  56.474  0.00  0.00      MON1  
ATOM   1355  HH  TYR M  89      76.744  80.243  57.408  0.00  0.00      MON1  
ATOM   1356  CD2 TYR M  89      74.617  77.342  56.238  0.00  0.00      MON1  
ATOM   1357  HD2 TYR M  89      74.186  76.633  56.896  0.00  0.00      MON1  
ATOM   1358  CE2 TYR M  89      75.328  78.412  56.771  0.00  0.00      MON1  
ATOM   1359  HE2 TYR M  89      75.290  78.609  57.832  0.00  0.00      MON1  
ATOM   1360  C   TYR M  89      71.842  75.559  52.867  0.00  0.00      MON1  
ATOM   1361  O   TYR M  89      71.945  75.663  51.648  0.00  0.00      MON1  
ATOM   1362  N   HSE M  90      71.120  74.571  53.403  0.00  0.00      MON1  
ATOM   1363  HN  HSE M  90      70.953  74.500  54.393  0.00  0.00      MON1  
ATOM   1364  CA  HSE M  90      70.644  73.516  52.541  0.00  0.00      MON1  
ATOM   1365  HA  HSE M  90      70.574  73.845  51.512  0.00  0.00      MON1  
ATOM   1366  CB  HSE M  90      71.573  72.288  52.581  0.00  0.00      MON1  
ATOM   1367  HB1 HSE M  90      71.204  71.484  51.931  0.00  0.00      MON1  
ATOM   1368  HB2 HSE M  90      71.648  71.895  53.617  0.00  0.00      MON1  
ATOM   1369  ND1 HSE M  90      73.979  72.938  52.943  0.00  0.00      MON1  
ATOM   1370  CG  HSE M  90      72.950  72.607  52.080  0.00  0.00      MON1  
ATOM   1371  CE1 HSE M  90      75.023  73.171  52.174  0.00  0.00      MON1  
ATOM   1372  HE1 HSE M  90      75.997  73.500  52.543  0.00  0.00      MON1  
ATOM   1373  NE2 HSE M  90      74.724  72.985  50.875  0.00  0.00      MON1  
ATOM   1374  HE2 HSE M  90      75.289  73.173  50.080  0.00  0.00      MON1  
ATOM   1375  CD2 HSE M  90      73.413  72.633  50.810  0.00  0.00      MON1  
ATOM   1376  HD2 HSE M  90      72.897  72.698  49.879  0.00  0.00      MON1  
ATOM   1377  C   HSE M  90      69.252  73.136  52.908  0.00  0.00      MON1  
ATOM   1378  O   HSE M  90      68.921  71.959  53.006  0.00  0.00      MON1  
ATOM   1379  N   GLU M  91      68.371  74.136  53.090  0.00  0.00      MON1  
ATOM   1380  HN  GLU M  91      68.660  75.094  53.110  0.00  0.00      MON1  
ATOM   1381  CA  GLU M  91      66.997  73.872  53.445  0.00  0.00      MON1  
ATOM   1382  HA  GLU M  91      66.983  73.296  54.360  0.00  0.00      MON1  
ATOM   1383  CB  GLU M  91      66.217  75.165  53.650  0.00  0.00      MON1  
ATOM   1384  HB1 GLU M  91      66.296  75.838  52.767  0.00  0.00      MON1  
ATOM   1385  HB2 GLU M  91      66.649  75.657  54.521  0.00  0.00      MON1  
ATOM   1386  CG  GLU M  91      64.776  75.019  54.146  0.00  0.00      MON1  
ATOM   1387  HG1 GLU M  91      64.746  74.427  55.082  0.00  0.00      MON1  
ATOM   1388  HG2 GLU M  91      64.132  74.530  53.385  0.00  0.00      MON1  
ATOM   1389  CD  GLU M  91      64.213  76.407  54.407  0.00  0.00      MON1  
ATOM   1390  OE1 GLU M  91      64.784  77.419  53.931  0.00  0.00      MON1  
ATOM   1391  OE2 GLU M  91      63.172  76.441  55.110  0.00  0.00      MON1  
ATOM   1392  C   GLU M  91      66.286  73.066  52.406  0.00  0.00      MON1  
ATOM   1393  O   GLU M  91      65.571  72.136  52.735  0.00  0.00      MON1  
ATOM   1394  N   PHE M  92      66.527  73.397  51.128  0.00  0.00      MON1  
ATOM   1395  HN  PHE M  92      67.098  74.189  50.944  0.00  0.00      MON1  
ATOM   1396  CA  PHE M  92      65.873  72.793  49.990  0.00  0.00      MON1  
ATOM   1397  HA  PHE M  92      64.862  72.538  50.285  0.00  0.00      MON1  
ATOM   1398  CB  PHE M  92      65.846  73.785  48.807  0.00  0.00      MON1  
ATOM   1399  HB1 PHE M  92      65.283  73.390  47.936  0.00  0.00      MON1  
ATOM   1400  HB2 PHE M  92      66.871  74.074  48.488  0.00  0.00      MON1  
ATOM   1401  CG  PHE M  92      65.121  74.977  49.336  0.00  0.00      MON1  
ATOM   1402  CD1 PHE M  92      63.750  74.891  49.603  0.00  0.00      MON1  
ATOM   1403  HD1 PHE M  92      63.223  73.970  49.404  0.00  0.00      MON1  
ATOM   1404  CE1 PHE M  92      63.068  75.973  50.167  0.00  0.00      MON1  
ATOM   1405  HE1 PHE M  92      62.021  75.891  50.413  0.00  0.00      MON1  
ATOM   1406  CZ  PHE M  92      63.757  77.146  50.477  0.00  0.00      MON1  
ATOM   1407  HZ  PHE M  92      63.246  77.967  50.959  0.00  0.00      MON1  
ATOM   1408  CD2 PHE M  92      65.809  76.148  49.667  0.00  0.00      MON1  
ATOM   1409  HD2 PHE M  92      66.872  76.225  49.490  0.00  0.00      MON1  
ATOM   1410  CE2 PHE M  92      65.130  77.228  50.236  0.00  0.00      MON1  
ATOM   1411  HE2 PHE M  92      65.678  78.116  50.517  0.00  0.00      MON1  
ATOM   1412  C   PHE M  92      66.491  71.497  49.548  0.00  0.00      MON1  
ATOM   1413  O   PHE M  92      65.886  70.753  48.769  0.00  0.00      MON1  
ATOM   1414  N   ASP M  93      67.704  71.178  50.023  0.00  0.00      MON1  
ATOM   1415  HN  ASP M  93      68.160  71.743  50.704  0.00  0.00      MON1  
ATOM   1416  CA  ASP M  93      68.347  69.947  49.644  0.00  0.00      MON1  
ATOM   1417  HA  ASP M  93      68.102  69.727  48.612  0.00  0.00      MON1  
ATOM   1418  CB  ASP M  93      69.873  70.001  49.788  0.00  0.00      MON1  
ATOM   1419  HB1 ASP M  93      70.352  69.026  49.561  0.00  0.00      MON1  
ATOM   1420  HB2 ASP M  93      70.130  70.290  50.817  0.00  0.00      MON1  
ATOM   1421  CG  ASP M  93      70.410  71.013  48.800  0.00  0.00      MON1  
ATOM   1422  OD1 ASP M  93      69.698  71.363  47.826  0.00  0.00      MON1  
ATOM   1423  OD2 ASP M  93      71.597  71.368  48.927  0.00  0.00      MON1  
ATOM   1424  C   ASP M  93      67.812  68.819  50.469  0.00  0.00      MON1  
ATOM   1425  O   ASP M  93      67.469  68.961  51.637  0.00  0.00      MON1  
ATOM   1426  N   SER M  94      67.711  67.630  49.856  0.00  0.00      MON1  
ATOM   1427  HN  SER M  94      68.017  67.529  48.918  0.00  0.00      MON1  
ATOM   1428  CA  SER M  94      67.348  66.443  50.588  0.00  0.00      MON1  
ATOM   1429  HA  SER M  94      66.513  66.671  51.229  0.00  0.00      MON1  
ATOM   1430  CB  SER M  94      67.003  65.231  49.705  0.00  0.00      MON1  
ATOM   1431  HB1 SER M  94      67.829  65.022  48.989  0.00  0.00      MON1  
ATOM   1432  HB2 SER M  94      66.098  65.496  49.112  0.00  0.00      MON1  
ATOM   1433  OG  SER M  94      66.707  64.053  50.456  0.00  0.00      MON1  
ATOM   1434  HG1 SER M  94      67.527  63.567  50.616  0.00  0.00      MON1  
ATOM   1435  C   SER M  94      68.506  66.100  51.415  0.00  0.00      MON1  
ATOM   1436  O   SER M  94      69.655  66.324  51.008  0.00  0.00      MON1  
ATOM   1437  N   PRO M  95      68.255  65.578  52.582  0.00  0.00      MON1  
ATOM   1438  CD  PRO M  95      69.294  65.227  53.299  0.00  0.00      MON1  
ATOM   1439  HD1 PRO M  95      70.056  66.041  53.336  0.00  0.00      MON1  
ATOM   1440  HD2 PRO M  95      69.492  64.295  52.735  0.00  0.00      MON1  
ATOM   1441  CA  PRO M  95      67.103  65.052  53.247  0.00  0.00      MON1  
ATOM   1442  HA  PRO M  95      66.375  64.619  52.594  0.00  0.00      MON1  
ATOM   1443  CB  PRO M  95      67.657  64.091  54.294  0.00  0.00      MON1  
ATOM   1444  HB1 PRO M  95      68.004  63.179  53.767  0.00  0.00      MON1  
ATOM   1445  HB2 PRO M  95      66.973  63.869  55.137  0.00  0.00      MON1  
ATOM   1446  CG  PRO M  95      68.874  64.776  54.693  0.00  0.00      MON1  
ATOM   1447  HG1 PRO M  95      68.617  65.710  55.251  0.00  0.00      MON1  
ATOM   1448  HG2 PRO M  95      69.543  64.338  55.410  0.00  0.00      MON1  
ATOM   1449  C   PRO M  95      66.430  66.134  53.968  0.00  0.00      MON1  
ATOM   1450  O   PRO M  95      65.383  65.850  54.527  0.00  0.00      MON1  
ATOM   1451  N   CYS M  96      66.966  67.368  54.022  0.00  0.00      MON1  
ATOM   1452  HN  CYS M  96      67.792  67.624  53.522  0.00  0.00      MON1  
ATOM   1453  CA  CYS M  96      66.299  68.412  54.761  0.00  0.00      MON1  
ATOM   1454  HA  CYS M  96      66.205  68.091  55.789  0.00  0.00      MON1  
ATOM   1455  CB  CYS M  96      67.032  69.770  54.700  0.00  0.00      MON1  
ATOM   1456  HB1 CYS M  96      66.420  70.558  55.193  0.00  0.00      MON1  
ATOM   1457  HB2 CYS M  96      67.151  70.107  53.650  0.00  0.00      MON1  
ATOM   1458  SG  CYS M  96      68.660  69.708  55.500  0.00  0.00      MON1  
ATOM   1459  HG1 CYS M  96      68.209  69.909  56.730  0.00  0.00      MON1  
ATOM   1460  C   CYS M  96      64.904  68.617  54.232  0.00  0.00      MON1  
ATOM   1461  O   CYS M  96      63.944  68.657  54.999  0.00  0.00      MON1  
ATOM   1462  N   SER M  97      64.770  68.653  52.902  0.00  0.00      MON1  
ATOM   1463  HN  SER M  97      65.583  68.715  52.320  0.00  0.00      MON1  
ATOM   1464  CA  SER M  97      63.476  68.667  52.269  0.00  0.00      MON1  
ATOM   1465  HA  SER M  97      62.682  68.687  53.000  0.00  0.00      MON1  
ATOM   1466  CB  SER M  97      63.271  69.831  51.285  0.00  0.00      MON1  
ATOM   1467  HB1 SER M  97      62.317  69.727  50.723  0.00  0.00      MON1  
ATOM   1468  HB2 SER M  97      64.109  69.854  50.552  0.00  0.00      MON1  
ATOM   1469  OG  SER M  97      63.253  71.073  51.969  0.00  0.00      MON1  
ATOM   1470  HG1 SER M  97      62.469  71.138  52.541  0.00  0.00      MON1  
ATOM   1471  C   SER M  97      63.357  67.403  51.485  0.00  0.00      MON1  
ATOM   1472  O   SER M  97      64.244  67.044  50.716  0.00  0.00      MON1  
ATOM   1473  N   LEU M  98      62.247  66.678  51.652  0.00  0.00      MON1  
ATOM   1474  HN  LEU M  98      61.517  66.993  52.267  0.00  0.00      MON1  
ATOM   1475  CA  LEU M  98      62.047  65.427  50.968  0.00  0.00      MON1  
ATOM   1476  HA  LEU M  98      62.978  65.057  50.564  0.00  0.00      MON1  
ATOM   1477  CB  LEU M  98      61.401  64.361  51.867  0.00  0.00      MON1  
ATOM   1478  HB1 LEU M  98      61.317  63.398  51.312  0.00  0.00      MON1  
ATOM   1479  HB2 LEU M  98      60.376  64.684  52.154  0.00  0.00      MON1  
ATOM   1480  CG  LEU M  98      62.197  64.112  53.147  0.00  0.00      MON1  
ATOM   1481  HG  LEU M  98      62.200  65.063  53.732  0.00  0.00      MON1  
ATOM   1482  CD1 LEU M  98      61.465  63.048  53.954  0.00  0.00      MON1  
ATOM   1483 HD11 LEU M  98      61.900  62.053  53.740  0.00  0.00      MON1  
ATOM   1484 HD12 LEU M  98      60.390  63.044  53.676  0.00  0.00      MON1  
ATOM   1485 HD13 LEU M  98      61.495  63.277  55.026  0.00  0.00      MON1  
ATOM   1486  CD2 LEU M  98      63.655  63.748  52.833  0.00  0.00      MON1  
ATOM   1487 HD21 LEU M  98      64.099  64.382  52.043  0.00  0.00      MON1  
ATOM   1488 HD22 LEU M  98      63.754  62.687  52.530  0.00  0.00      MON1  
ATOM   1489 HD23 LEU M  98      64.286  63.933  53.709  0.00  0.00      MON1  
ATOM   1490  C   LEU M  98      61.143  65.652  49.811  0.00  0.00      MON1  
ATOM   1491  O   LEU M  98      60.103  66.284  49.946  0.00  0.00      MON1  
ATOM   1492  N   TYR M  99      61.512  65.122  48.642  0.00  0.00      MON1  
ATOM   1493  HN  TYR M  99      62.360  64.613  48.548  0.00  0.00      MON1  
ATOM   1494  CA  TYR M  99      60.677  65.239  47.473  0.00  0.00      MON1  
ATOM   1495  HA  TYR M  99      59.839  65.905  47.643  0.00  0.00      MON1  
ATOM   1496  CB  TYR M  99      61.438  65.699  46.229  0.00  0.00      MON1  
ATOM   1497  HB1 TYR M  99      60.799  65.748  45.343  0.00  0.00      MON1  
ATOM   1498  HB2 TYR M  99      62.228  64.987  46.022  0.00  0.00      MON1  
ATOM   1499  CG  TYR M  99      62.018  67.043  46.453  0.00  0.00      MON1  
ATOM   1500  CD1 TYR M  99      63.287  67.196  47.018  0.00  0.00      MON1  
ATOM   1501  HD1 TYR M  99      63.856  66.325  47.310  0.00  0.00      MON1  
ATOM   1502  CE1 TYR M  99      63.791  68.474  47.276  0.00  0.00      MON1  
ATOM   1503  HE1 TYR M  99      64.738  68.586  47.784  0.00  0.00      MON1  
ATOM   1504  CZ  TYR M  99      63.053  69.603  46.924  0.00  0.00      MON1  
ATOM   1505  OH  TYR M  99      63.575  70.892  47.142  0.00  0.00      MON1  
ATOM   1506  HH  TYR M  99      64.345  70.813  47.733  0.00  0.00      MON1  
ATOM   1507  CD2 TYR M  99      61.294  68.176  46.082  0.00  0.00      MON1  
ATOM   1508  HD2 TYR M  99      60.357  68.061  45.563  0.00  0.00      MON1  
ATOM   1509  CE2 TYR M  99      61.814  69.452  46.309  0.00  0.00      MON1  
ATOM   1510  HE2 TYR M  99      61.318  70.329  45.931  0.00  0.00      MON1  
ATOM   1511  C   TYR M  99      60.143  63.878  47.190  0.00  0.00      MON1  
ATOM   1512  O   TYR M  99      60.902  62.966  46.886  0.00  0.00      MON1  
ATOM   1513  N   LEU M 100      58.821  63.742  47.313  0.00  0.00      MON1  
ATOM   1514  HN  LEU M 100      58.252  64.543  47.524  0.00  0.00      MON1  
ATOM   1515  CA  LEU M 100      58.119  62.500  47.206  0.00  0.00      MON1  
ATOM   1516  HA  LEU M 100      58.739  61.705  47.581  0.00  0.00      MON1  
ATOM   1517  CB  LEU M 100      56.796  62.533  47.995  0.00  0.00      MON1  
ATOM   1518  HB1 LEU M 100      56.323  61.528  48.032  0.00  0.00      MON1  
ATOM   1519  HB2 LEU M 100      56.097  63.236  47.487  0.00  0.00      MON1  
ATOM   1520  CG  LEU M 100      56.922  63.063  49.434  0.00  0.00      MON1  
ATOM   1521  HG  LEU M 100      57.213  64.141  49.391  0.00  0.00      MON1  
ATOM   1522  CD1 LEU M 100      55.586  62.979  50.176  0.00  0.00      MON1  
ATOM   1523 HD11 LEU M 100      55.458  61.959  50.600  0.00  0.00      MON1  
ATOM   1524 HD12 LEU M 100      54.709  63.133  49.533  0.00  0.00      MON1  
ATOM   1525 HD13 LEU M 100      55.549  63.699  51.018  0.00  0.00      MON1  
ATOM   1526  CD2 LEU M 100      57.986  62.308  50.239  0.00  0.00      MON1  
ATOM   1527 HD21 LEU M 100      58.994  62.440  49.794  0.00  0.00      MON1  
ATOM   1528 HD22 LEU M 100      57.749  61.224  50.268  0.00  0.00      MON1  
ATOM   1529 HD23 LEU M 100      58.017  62.690  51.282  0.00  0.00      MON1  
ATOM   1530  C   LEU M 100      57.761  62.243  45.777  0.00  0.00      MON1  
ATOM   1531  O   LEU M 100      57.653  63.127  44.936  0.00  0.00      MON1  
ATOM   1532  N   SER M 101      57.465  60.999  45.492  0.00  0.00      MON1  
ATOM   1533  HN  SER M 101      57.613  60.313  46.196  0.00  0.00      MON1  
ATOM   1534  CA  SER M 101      56.968  60.522  44.232  0.00  0.00      MON1  
ATOM   1535  HA  SER M 101      57.603  60.836  43.415  0.00  0.00      MON1  
ATOM   1536  CB  SER M 101      57.014  59.039  44.488  0.00  0.00      MON1  
ATOM   1537  HB1 SER M 101      57.418  58.921  45.506  0.00  0.00      MON1  
ATOM   1538  HB2 SER M 101      57.853  58.509  44.002  0.00  0.00      MON1  
ATOM   1539  OG  SER M 101      55.834  58.396  44.952  0.00  0.00      MON1  
ATOM   1540  HG1 SER M 101      55.268  58.272  44.179  0.00  0.00      MON1  
ATOM   1541  C   SER M 101      55.553  60.988  44.007  0.00  0.00      MON1  
ATOM   1542  O   SER M 101      55.055  61.079  42.892  0.00  0.00      MON1  
ATOM   1543  N   THR M 102      54.887  61.334  45.121  0.00  0.00      MON1  
ATOM   1544  HN  THR M 102      55.305  61.216  46.017  0.00  0.00      MON1  
ATOM   1545  CA  THR M 102      53.556  61.878  45.146  0.00  0.00      MON1  
ATOM   1546  HA  THR M 102      52.937  61.294  44.482  0.00  0.00      MON1  
ATOM   1547  CB  THR M 102      52.948  61.882  46.538  0.00  0.00      MON1  
ATOM   1548  HB  THR M 102      51.925  62.316  46.518  0.00  0.00      MON1  
ATOM   1549  OG1 THR M 102      53.732  62.641  47.438  0.00  0.00      MON1  
ATOM   1550  HG1 THR M 102      53.173  63.409  47.670  0.00  0.00      MON1  
ATOM   1551  CG2 THR M 102      52.866  60.440  47.060  0.00  0.00      MON1  
ATOM   1552 HG21 THR M 102      53.878  59.996  47.167  0.00  0.00      MON1  
ATOM   1553 HG22 THR M 102      52.269  59.801  46.378  0.00  0.00      MON1  
ATOM   1554 HG23 THR M 102      52.391  60.430  48.064  0.00  0.00      MON1  
ATOM   1555  C   THR M 102      53.572  63.285  44.626  0.00  0.00      MON1  
ATOM   1556  O   THR M 102      52.507  63.828  44.351  0.00  0.00      MON1  
ATOM   1557  N   ALA M 103      54.784  63.871  44.502  0.00  0.00      MON1  
ATOM   1558  HN  ALA M 103      55.598  63.326  44.697  0.00  0.00      MON1  
ATOM   1559  CA  ALA M 103      55.055  65.206  44.040  0.00  0.00      MON1  
ATOM   1560  HA  ALA M 103      56.083  65.225  43.707  0.00  0.00      MON1  
ATOM   1561  CB  ALA M 103      54.144  65.635  42.882  0.00  0.00      MON1  
ATOM   1562  HB1 ALA M 103      53.111  65.694  43.243  0.00  0.00      MON1  
ATOM   1563  HB2 ALA M 103      54.159  64.890  42.063  0.00  0.00      MON1  
ATOM   1564  HB3 ALA M 103      54.435  66.620  42.470  0.00  0.00      MON1  
ATOM   1565  C   ALA M 103      54.939  66.206  45.158  0.00  0.00      MON1  
ATOM   1566  O   ALA M 103      54.994  67.413  44.926  0.00  0.00      MON1  
ATOM   1567  N   ASN M 104      54.803  65.728  46.408  0.00  0.00      MON1  
ATOM   1568  HN  ASN M 104      54.706  64.747  46.553  0.00  0.00      MON1  
ATOM   1569  CA  ASN M 104      54.813  66.579  47.574  0.00  0.00      MON1  
ATOM   1570  HA  ASN M 104      54.330  67.521  47.342  0.00  0.00      MON1  
ATOM   1571  CB  ASN M 104      54.197  65.951  48.836  0.00  0.00      MON1  
ATOM   1572  HB1 ASN M 104      54.336  66.590  49.736  0.00  0.00      MON1  
ATOM   1573  HB2 ASN M 104      54.713  65.002  49.015  0.00  0.00      MON1  
ATOM   1574  CG  ASN M 104      52.734  65.654  48.634  0.00  0.00      MON1  
ATOM   1575  OD1 ASN M 104      52.351  64.867  47.770  0.00  0.00      MON1  
ATOM   1576  ND2 ASN M 104      51.875  66.290  49.459  0.00  0.00      MON1  
ATOM   1577 HD21 ASN M 104      52.261  66.794  50.229  0.00  0.00      MON1  
ATOM   1578 HD22 ASN M 104      50.935  65.971  49.434  0.00  0.00      MON1  
ATOM   1579  C   ASN M 104      56.235  66.861  47.957  0.00  0.00      MON1  
ATOM   1580  O   ASN M 104      57.145  66.098  47.636  0.00  0.00      MON1  
ATOM   1581  N   ILE M 105      56.435  67.959  48.693  0.00  0.00      MON1  
ATOM   1582  HN  ILE M 105      55.695  68.578  48.938  0.00  0.00      MON1  
ATOM   1583  CA  ILE M 105      57.719  68.293  49.251  0.00  0.00      MON1  
ATOM   1584  HA  ILE M 105      58.431  67.512  49.057  0.00  0.00      MON1  
ATOM   1585  CB  ILE M 105      58.270  69.605  48.732  0.00  0.00      MON1  
ATOM   1586  HB  ILE M 105      57.575  70.444  48.977  0.00  0.00      MON1  
ATOM   1587  CG2 ILE M 105      59.629  69.873  49.424  0.00  0.00      MON1  
ATOM   1588 HG21 ILE M 105      60.335  69.040  49.216  0.00  0.00      MON1  
ATOM   1589 HG22 ILE M 105      59.534  69.992  50.523  0.00  0.00      MON1  
ATOM   1590 HG23 ILE M 105      60.088  70.810  49.051  0.00  0.00      MON1  
ATOM   1591  CG1 ILE M 105      58.370  69.551  47.195  0.00  0.00      MON1  
ATOM   1592 HG11 ILE M 105      57.367  69.354  46.753  0.00  0.00      MON1  
ATOM   1593 HG12 ILE M 105      59.000  68.686  46.942  0.00  0.00      MON1  
ATOM   1594  CD  ILE M 105      58.885  70.852  46.571  0.00  0.00      MON1  
ATOM   1595  HD1 ILE M 105      59.825  71.206  47.035  0.00  0.00      MON1  
ATOM   1596  HD2 ILE M 105      58.132  71.658  46.711  0.00  0.00      MON1  
ATOM   1597  HD3 ILE M 105      59.047  70.735  45.478  0.00  0.00      MON1  
ATOM   1598  C   ILE M 105      57.517  68.433  50.729  0.00  0.00      MON1  
ATOM   1599  O   ILE M 105      56.745  69.280  51.169  0.00  0.00      MON1  
ATOM   1600  N   VAL M 106      58.206  67.622  51.538  0.00  0.00      MON1  
ATOM   1601  HN  VAL M 106      58.886  66.993  51.150  0.00  0.00      MON1  
ATOM   1602  CA  VAL M 106      58.022  67.640  52.973  0.00  0.00      MON1  
ATOM   1603  HA  VAL M 106      57.188  68.268  53.256  0.00  0.00      MON1  
ATOM   1604  CB  VAL M 106      57.809  66.251  53.535  0.00  0.00      MON1  
ATOM   1605  HB  VAL M 106      58.676  65.602  53.264  0.00  0.00      MON1  
ATOM   1606  CG1 VAL M 106      57.692  66.311  55.074  0.00  0.00      MON1  
ATOM   1607 HG11 VAL M 106      56.927  67.057  55.370  0.00  0.00      MON1  
ATOM   1608 HG12 VAL M 106      58.654  66.559  55.565  0.00  0.00      MON1  
ATOM   1609 HG13 VAL M 106      57.370  65.320  55.462  0.00  0.00      MON1  
ATOM   1610  CG2 VAL M 106      56.554  65.632  52.906  0.00  0.00      MON1  
ATOM   1611 HG21 VAL M 106      56.468  65.808  51.816  0.00  0.00      MON1  
ATOM   1612 HG22 VAL M 106      55.652  65.997  53.430  0.00  0.00      MON1  
ATOM   1613 HG23 VAL M 106      56.592  64.532  53.061  0.00  0.00      MON1  
ATOM   1614  C   VAL M 106      59.251  68.202  53.612  0.00  0.00      MON1  
ATOM   1615  O   VAL M 106      60.370  67.807  53.291  0.00  0.00      MON1  
ATOM   1616  N   ASN M 107      59.094  69.127  54.568  0.00  0.00      MON1  
ATOM   1617  HN  ASN M 107      58.179  69.451  54.841  0.00  0.00      MON1  
ATOM   1618  CA  ASN M 107      60.244  69.650  55.265  0.00  0.00      MON1  
ATOM   1619  HA  ASN M 107      61.128  69.595  54.639  0.00  0.00      MON1  
ATOM   1620  CB  ASN M 107      60.043  71.099  55.725  0.00  0.00      MON1  
ATOM   1621  HB1 ASN M 107      60.841  71.418  56.431  0.00  0.00      MON1  
ATOM   1622  HB2 ASN M 107      59.053  71.222  56.210  0.00  0.00      MON1  
ATOM   1623  CG  ASN M 107      60.181  71.979  54.499  0.00  0.00      MON1  
ATOM   1624  OD1 ASN M 107      60.979  71.714  53.597  0.00  0.00      MON1  
ATOM   1625  ND2 ASN M 107      59.367  73.044  54.444  0.00  0.00      MON1  
ATOM   1626 HD21 ASN M 107      59.540  73.742  53.752  0.00  0.00      MON1  
ATOM   1627 HD22 ASN M 107      58.564  73.107  55.029  0.00  0.00      MON1  
ATOM   1628  C   ASN M 107      60.547  68.791  56.449  0.00  0.00      MON1  
ATOM   1629  O   ASN M 107      60.158  69.079  57.578  0.00  0.00      MON1  
ATOM   1630  N   TRP M 108      61.311  67.717  56.197  0.00  0.00      MON1  
ATOM   1631  HN  TRP M 108      61.624  67.554  55.262  0.00  0.00      MON1  
ATOM   1632  CA  TRP M 108      61.755  66.771  57.188  0.00  0.00      MON1  
ATOM   1633  HA  TRP M 108      60.888  66.346  57.675  0.00  0.00      MON1  
ATOM   1634  CB  TRP M 108      62.609  65.655  56.555  0.00  0.00      MON1  
ATOM   1635  HB1 TRP M 108      63.309  66.114  55.823  0.00  0.00      MON1  
ATOM   1636  HB2 TRP M 108      61.933  64.992  55.988  0.00  0.00      MON1  
ATOM   1637  CG  TRP M 108      63.405  64.837  57.527  0.00  0.00      MON1  
ATOM   1638  CD1 TRP M 108      64.755  64.859  57.759  0.00  0.00      MON1  
ATOM   1639  HD1 TRP M 108      65.458  65.434  57.168  0.00  0.00      MON1  
ATOM   1640  NE1 TRP M 108      65.067  63.963  58.757  0.00  0.00      MON1  
ATOM   1641  HE1 TRP M 108      65.961  63.752  59.111  0.00  0.00      MON1  
ATOM   1642  CE2 TRP M 108      63.919  63.408  59.217  0.00  0.00      MON1  
ATOM   1643  CD2 TRP M 108      62.847  63.953  58.482  0.00  0.00      MON1  
ATOM   1644  CE3 TRP M 108      61.554  63.596  58.758  0.00  0.00      MON1  
ATOM   1645  HE3 TRP M 108      60.743  64.011  58.185  0.00  0.00      MON1  
ATOM   1646  CZ3 TRP M 108      61.363  62.837  59.880  0.00  0.00      MON1  
ATOM   1647  HZ3 TRP M 108      60.394  62.827  60.326  0.00  0.00      MON1  
ATOM   1648  CZ2 TRP M 108      63.704  62.556  60.263  0.00  0.00      MON1  
ATOM   1649  HZ2 TRP M 108      64.529  62.241  60.874  0.00  0.00      MON1  
ATOM   1650  CH2 TRP M 108      62.397  62.309  60.632  0.00  0.00      MON1  
ATOM   1651  HH2 TRP M 108      62.188  61.766  61.545  0.00  0.00      MON1  
ATOM   1652  C   TRP M 108      62.568  67.428  58.256  0.00  0.00      MON1  
ATOM   1653  O   TRP M 108      62.473  67.078  59.430  0.00  0.00      MON1  
ATOM   1654  N   LEU M 109      63.400  68.403  57.860  0.00  0.00      MON1  
ATOM   1655  HN  LEU M 109      63.503  68.616  56.884  0.00  0.00      MON1  
ATOM   1656  CA  LEU M 109      64.247  69.077  58.800  0.00  0.00      MON1  
ATOM   1657  HA  LEU M 109      64.895  68.341  59.256  0.00  0.00      MON1  
ATOM   1658  CB  LEU M 109      65.081  70.160  58.083  0.00  0.00      MON1  
ATOM   1659  HB1 LEU M 109      64.399  70.897  57.603  0.00  0.00      MON1  
ATOM   1660  HB2 LEU M 109      65.662  69.676  57.270  0.00  0.00      MON1  
ATOM   1661  CG  LEU M 109      66.066  70.908  58.995  0.00  0.00      MON1  
ATOM   1662  HG  LEU M 109      65.471  71.264  59.855  0.00  0.00      MON1  
ATOM   1663  CD1 LEU M 109      67.157  69.989  59.562  0.00  0.00      MON1  
ATOM   1664 HD11 LEU M 109      67.738  69.522  58.739  0.00  0.00      MON1  
ATOM   1665 HD12 LEU M 109      66.715  69.185  60.187  0.00  0.00      MON1  
ATOM   1666 HD13 LEU M 109      67.859  70.572  60.196  0.00  0.00      MON1  
ATOM   1667  CD2 LEU M 109      66.684  72.113  58.263  0.00  0.00      MON1  
ATOM   1668 HD21 LEU M 109      65.902  72.780  57.844  0.00  0.00      MON1  
ATOM   1669 HD22 LEU M 109      67.313  71.767  57.415  0.00  0.00      MON1  
ATOM   1670 HD23 LEU M 109      67.331  72.709  58.940  0.00  0.00      MON1  
ATOM   1671  C   LEU M 109      63.425  69.710  59.909  0.00  0.00      MON1  
ATOM   1672  O   LEU M 109      63.790  69.633  61.075  0.00  0.00      MON1  
ATOM   1673  N   ARG M 110      62.289  70.346  59.552  0.00  0.00      MON1  
ATOM   1674  HN  ARG M 110      61.996  70.303  58.602  0.00  0.00      MON1  
ATOM   1675  CA  ARG M 110      61.416  71.092  60.449  0.00  0.00      MON1  
ATOM   1676  HA  ARG M 110      62.035  71.796  60.990  0.00  0.00      MON1  
ATOM   1677  CB  ARG M 110      60.411  71.880  59.554  0.00  0.00      MON1  
ATOM   1678  HB1 ARG M 110      59.560  71.239  59.241  0.00  0.00      MON1  
ATOM   1679  HB2 ARG M 110      60.979  72.132  58.629  0.00  0.00      MON1  
ATOM   1680  CG  ARG M 110      59.912  73.231  60.119  0.00  0.00      MON1  
ATOM   1681  HG1 ARG M 110      60.623  73.600  60.891  0.00  0.00      MON1  
ATOM   1682  HG2 ARG M 110      58.943  73.065  60.638  0.00  0.00      MON1  
ATOM   1683  CD  ARG M 110      59.734  74.337  59.045  0.00  0.00      MON1  
ATOM   1684  HD1 ARG M 110      59.174  75.194  59.486  0.00  0.00      MON1  
ATOM   1685  HD2 ARG M 110      59.174  73.948  58.167  0.00  0.00      MON1  
ATOM   1686  NE  ARG M 110      61.088  74.836  58.643  0.00  0.00      MON1  
ATOM   1687  HE  ARG M 110      61.619  75.308  59.355  0.00  0.00      MON1  
ATOM   1688  CZ  ARG M 110      61.646  74.850  57.442  0.00  0.00      MON1  
ATOM   1689  NH1 ARG M 110      61.052  74.839  56.276  0.00  0.00      MON1  
ATOM   1690 HH11 ARG M 110      61.633  75.216  55.543  0.00  0.00      MON1  
ATOM   1691 HH12 ARG M 110      60.083  75.047  56.208  0.00  0.00      MON1  
ATOM   1692  NH2 ARG M 110      62.938  75.019  57.333  0.00  0.00      MON1  
ATOM   1693 HH21 ARG M 110      63.297  75.762  57.933  0.00  0.00      MON1  
ATOM   1694 HH22 ARG M 110      63.190  75.400  56.424  0.00  0.00      MON1  
ATOM   1695  C   ARG M 110      60.771  70.170  61.496  0.00  0.00      MON1  
ATOM   1696  O   ARG M 110      60.787  70.447  62.691  0.00  0.00      MON1  
ATOM   1697  N   TYR M 111      60.282  68.986  61.067  0.00  0.00      MON1  
ATOM   1698  HN  TYR M 111      60.281  68.789  60.090  0.00  0.00      MON1  
ATOM   1699  CA  TYR M 111      59.714  67.966  61.939  0.00  0.00      MON1  
ATOM   1700  HA  TYR M 111      59.114  68.476  62.683  0.00  0.00      MON1  
ATOM   1701  CB  TYR M 111      58.792  67.047  61.108  0.00  0.00      MON1  
ATOM   1702  HB1 TYR M 111      58.230  66.351  61.766  0.00  0.00      MON1  
ATOM   1703  HB2 TYR M 111      59.430  66.463  60.409  0.00  0.00      MON1  
ATOM   1704  CG  TYR M 111      57.790  67.846  60.300  0.00  0.00      MON1  
ATOM   1705  CD1 TYR M 111      56.894  68.751  60.900  0.00  0.00      MON1  
ATOM   1706  HD1 TYR M 111      56.917  68.879  61.970  0.00  0.00      MON1  
ATOM   1707  CE1 TYR M 111      56.006  69.516  60.119  0.00  0.00      MON1  
ATOM   1708  HE1 TYR M 111      55.349  70.231  60.590  0.00  0.00      MON1  
ATOM   1709  CZ  TYR M 111      55.984  69.357  58.728  0.00  0.00      MON1  
ATOM   1710  OH  TYR M 111      55.133  70.121  57.894  0.00  0.00      MON1  
ATOM   1711  HH  TYR M 111      54.850  70.925  58.376  0.00  0.00      MON1  
ATOM   1712  CD2 TYR M 111      57.743  67.695  58.907  0.00  0.00      MON1  
ATOM   1713  HD2 TYR M 111      58.434  67.029  58.414  0.00  0.00      MON1  
ATOM   1714  CE2 TYR M 111      56.843  68.431  58.134  0.00  0.00      MON1  
ATOM   1715  HE2 TYR M 111      56.847  68.301  57.069  0.00  0.00      MON1  
ATOM   1716  C   TYR M 111      60.731  67.118  62.730  0.00  0.00      MON1  
ATOM   1717  O   TYR M 111      60.465  66.753  63.874  0.00  0.00      MON1  
ATOM   1718  N   SER M 112      61.936  66.818  62.186  0.00  0.00      MON1  
ATOM   1719  HN  SER M 112      62.128  67.052  61.226  0.00  0.00      MON1  
ATOM   1720  CA  SER M 112      63.011  66.202  62.945  0.00  0.00      MON1  
ATOM   1721  HA  SER M 112      62.661  65.262  63.345  0.00  0.00      MON1  
ATOM   1722  CB  SER M 112      64.247  65.975  62.056  0.00  0.00      MON1  
ATOM   1723  HB1 SER M 112      64.557  66.929  61.572  0.00  0.00      MON1  
ATOM   1724  HB2 SER M 112      63.995  65.258  61.244  0.00  0.00      MON1  
ATOM   1725  OG  SER M 112      65.320  65.481  62.825  0.00  0.00      MON1  
ATOM   1726  HG1 SER M 112      65.066  64.621  63.174  0.00  0.00      MON1  
ATOM   1727  C   SER M 112      63.429  67.071  64.112  0.00  0.00      MON1  
ATOM   1728  O   SER M 112      63.607  66.595  65.231  0.00  0.00      MON1  
ATOM   1729  N   GLU M 113      63.570  68.386  63.850  0.00  0.00      MON1  
ATOM   1730  HN  GLU M 113      63.428  68.724  62.917  0.00  0.00      MON1  
ATOM   1731  CA  GLU M 113      63.959  69.396  64.811  0.00  0.00      MON1  
ATOM   1732  HA  GLU M 113      64.923  69.115  65.212  0.00  0.00      MON1  
ATOM   1733  CB  GLU M 113      64.081  70.833  64.254  0.00  0.00      MON1  
ATOM   1734  HB1 GLU M 113      63.088  71.227  63.944  0.00  0.00      MON1  
ATOM   1735  HB2 GLU M 113      64.709  70.794  63.338  0.00  0.00      MON1  
ATOM   1736  CG  GLU M 113      64.772  71.756  65.302  0.00  0.00      MON1  
ATOM   1737  HG1 GLU M 113      65.810  71.942  64.973  0.00  0.00      MON1  
ATOM   1738  HG2 GLU M 113      64.858  71.240  66.276  0.00  0.00      MON1  
ATOM   1739  CD  GLU M 113      64.084  73.080  65.626  0.00  0.00      MON1  
ATOM   1740  OE1 GLU M 113      62.923  73.242  65.957  0.00  0.00      MON1  
ATOM   1741  OE2 GLU M 113      64.979  74.111  65.635  0.00  0.00      MON1  
ATOM   1742  HE2 GLU M 113      64.503  74.949  65.498  0.00  0.00      MON1  
ATOM   1743  C   GLU M 113      62.988  69.474  65.977  0.00  0.00      MON1  
ATOM   1744  O   GLU M 113      63.413  69.474  67.132  0.00  0.00      MON1  
ATOM   1745  N   TRP M 114      61.664  69.439  65.691  0.00  0.00      MON1  
ATOM   1746  HN  TRP M 114      61.356  69.518  64.742  0.00  0.00      MON1  
ATOM   1747  CA  TRP M 114      60.615  69.318  66.688  0.00  0.00      MON1  
ATOM   1748  HA  TRP M 114      60.728  70.142  67.375  0.00  0.00      MON1  
ATOM   1749  CB  TRP M 114      59.205  69.475  66.075  0.00  0.00      MON1  
ATOM   1750  HB1 TRP M 114      58.442  69.341  66.875  0.00  0.00      MON1  
ATOM   1751  HB2 TRP M 114      59.056  68.669  65.323  0.00  0.00      MON1  
ATOM   1752  CG  TRP M 114      58.947  70.800  65.415  0.00  0.00      MON1  
ATOM   1753  CD1 TRP M 114      59.717  71.941  65.371  0.00  0.00      MON1  
ATOM   1754  HD1 TRP M 114      60.711  72.033  65.794  0.00  0.00      MON1  
ATOM   1755  NE1 TRP M 114      59.094  72.892  64.591  0.00  0.00      MON1  
ATOM   1756  HE1 TRP M 114      59.515  73.658  64.127  0.00  0.00      MON1  
ATOM   1757  CE2 TRP M 114      57.934  72.381  64.105  0.00  0.00      MON1  
ATOM   1758  CD2 TRP M 114      57.787  71.072  64.620  0.00  0.00      MON1  
ATOM   1759  CE3 TRP M 114      56.658  70.323  64.291  0.00  0.00      MON1  
ATOM   1760  HE3 TRP M 114      56.525  69.323  64.675  0.00  0.00      MON1  
ATOM   1761  CZ3 TRP M 114      55.730  70.879  63.412  0.00  0.00      MON1  
ATOM   1762  HZ3 TRP M 114      54.894  70.281  63.084  0.00  0.00      MON1  
ATOM   1763  CZ2 TRP M 114      57.007  72.930  63.239  0.00  0.00      MON1  
ATOM   1764  HZ2 TRP M 114      57.160  73.914  62.818  0.00  0.00      MON1  
ATOM   1765  CH2 TRP M 114      55.901  72.156  62.889  0.00  0.00      MON1  
ATOM   1766  HH2 TRP M 114      55.181  72.542  62.181  0.00  0.00      MON1  
ATOM   1767  C   TRP M 114      60.750  68.055  67.541  0.00  0.00      MON1  
ATOM   1768  O   TRP M 114      60.773  68.164  68.756  0.00  0.00      MON1  
ATOM   1769  N   LEU M 115      60.982  66.844  66.978  0.00  0.00      MON1  
ATOM   1770  HN  LEU M 115      61.025  66.743  65.984  0.00  0.00      MON1  
ATOM   1771  CA  LEU M 115      61.157  65.646  67.787  0.00  0.00      MON1  
ATOM   1772  HA  LEU M 115      60.259  65.494  68.368  0.00  0.00      MON1  
ATOM   1773  CB  LEU M 115      61.480  64.413  66.934  0.00  0.00      MON1  
ATOM   1774  HB1 LEU M 115      61.722  63.537  67.580  0.00  0.00      MON1  
ATOM   1775  HB2 LEU M 115      62.369  64.626  66.298  0.00  0.00      MON1  
ATOM   1776  CG  LEU M 115      60.305  64.024  66.046  0.00  0.00      MON1  
ATOM   1777  HG  LEU M 115      59.972  64.916  65.461  0.00  0.00      MON1  
ATOM   1778  CD1 LEU M 115      60.839  63.036  65.061  0.00  0.00      MON1  
ATOM   1779 HD11 LEU M 115      61.486  62.323  65.611  0.00  0.00      MON1  
ATOM   1780 HD12 LEU M 115      61.514  63.558  64.345  0.00  0.00      MON1  
ATOM   1781 HD13 LEU M 115      60.018  62.605  64.451  0.00  0.00      MON1  
ATOM   1782  CD2 LEU M 115      59.087  63.559  66.856  0.00  0.00      MON1  
ATOM   1783 HD21 LEU M 115      58.694  64.373  67.499  0.00  0.00      MON1  
ATOM   1784 HD22 LEU M 115      59.358  62.696  67.501  0.00  0.00      MON1  
ATOM   1785 HD23 LEU M 115      58.271  63.242  66.172  0.00  0.00      MON1  
ATOM   1786  C   LEU M 115      62.267  65.790  68.778  0.00  0.00      MON1  
ATOM   1787  O   LEU M 115      62.143  65.358  69.913  0.00  0.00      MON1  
ATOM   1788  N   LEU M 116      63.384  66.408  68.371  0.00  0.00      MON1  
ATOM   1789  HN  LEU M 116      63.477  66.730  67.428  0.00  0.00      MON1  
ATOM   1790  CA  LEU M 116      64.457  66.652  69.290  0.00  0.00      MON1  
ATOM   1791  HA  LEU M 116      64.671  65.732  69.796  0.00  0.00      MON1  
ATOM   1792  CB  LEU M 116      65.715  67.111  68.545  0.00  0.00      MON1  
ATOM   1793  HB1 LEU M 116      66.526  67.150  69.295  0.00  0.00      MON1  
ATOM   1794  HB2 LEU M 116      65.548  68.093  68.052  0.00  0.00      MON1  
ATOM   1795  CG  LEU M 116      66.281  66.145  67.508  0.00  0.00      MON1  
ATOM   1796  HG  LEU M 116      65.518  65.969  66.714  0.00  0.00      MON1  
ATOM   1797  CD1 LEU M 116      67.536  66.741  66.856  0.00  0.00      MON1  
ATOM   1798 HD11 LEU M 116      68.309  66.951  67.627  0.00  0.00      MON1  
ATOM   1799 HD12 LEU M 116      67.287  67.692  66.339  0.00  0.00      MON1  
ATOM   1800 HD13 LEU M 116      67.965  66.039  66.112  0.00  0.00      MON1  
ATOM   1801  CD2 LEU M 116      66.623  64.814  68.166  0.00  0.00      MON1  
ATOM   1802 HD21 LEU M 116      65.816  64.486  68.823  0.00  0.00      MON1  
ATOM   1803 HD22 LEU M 116      67.540  64.926  68.785  0.00  0.00      MON1  
ATOM   1804 HD23 LEU M 116      66.809  64.039  67.399  0.00  0.00      MON1  
ATOM   1805  C   LEU M 116      64.163  67.664  70.383  0.00  0.00      MON1  
ATOM   1806  O   LEU M 116      64.450  67.441  71.553  0.00  0.00      MON1  
ATOM   1807  N   CYS M 117      63.612  68.836  70.041  0.00  0.00      MON1  
ATOM   1808  HN  CYS M 117      63.320  68.995  69.095  0.00  0.00      MON1  
ATOM   1809  CA  CYS M 117      63.552  69.965  70.963  0.00  0.00      MON1  
ATOM   1810  HA  CYS M 117      64.373  69.896  71.665  0.00  0.00      MON1  
ATOM   1811  CB  CYS M 117      63.720  71.316  70.202  0.00  0.00      MON1  
ATOM   1812  HB1 CYS M 117      64.698  71.280  69.671  0.00  0.00      MON1  
ATOM   1813  HB2 CYS M 117      63.803  72.129  70.957  0.00  0.00      MON1  
ATOM   1814  SG  CYS M 117      62.389  71.709  69.004  0.00  0.00      MON1  
ATOM   1815  HG1 CYS M 117      62.784  70.845  68.076  0.00  0.00      MON1  
ATOM   1816  C   CYS M 117      62.267  70.039  71.798  0.00  0.00      MON1  
ATOM   1817  O   CYS M 117      62.272  70.505  72.936  0.00  0.00      MON1  
ATOM   1818  N   CYS M 118      61.136  69.592  71.237  0.00  0.00      MON1  
ATOM   1819  HN  CYS M 118      61.132  69.186  70.320  0.00  0.00      MON1  
ATOM   1820  CA  CYS M 118      59.817  69.673  71.805  0.00  0.00      MON1  
ATOM   1821  HA  CYS M 118      59.677  70.692  72.142  0.00  0.00      MON1  
ATOM   1822  CB  CYS M 118      58.832  69.517  70.578  0.00  0.00      MON1  
ATOM   1823  HB1 CYS M 118      58.914  68.477  70.217  0.00  0.00      MON1  
ATOM   1824  HB2 CYS M 118      59.298  70.113  69.760  0.00  0.00      MON1  
ATOM   1825  SG  CYS M 118      57.066  69.959  70.554  0.00  0.00      MON1  
ATOM   1826  C   CYS M 118      59.634  68.797  73.065  0.00  0.00      MON1  
ATOM   1827  O   CYS M 118      59.203  69.330  74.095  0.00  0.00      MON1  
ATOM   1828  N   PRO M 119      60.085  67.519  73.125  0.00  0.00      MON1  
ATOM   1829  CD  PRO M 119      60.157  66.643  71.959  0.00  0.00      MON1  
ATOM   1830  HD1 PRO M 119      61.131  66.822  71.462  0.00  0.00      MON1  
ATOM   1831  HD2 PRO M 119      59.320  66.802  71.250  0.00  0.00      MON1  
ATOM   1832  CA  PRO M 119      60.026  66.732  74.346  0.00  0.00      MON1  
ATOM   1833  HA  PRO M 119      59.007  66.749  74.702  0.00  0.00      MON1  
ATOM   1834  CB  PRO M 119      60.487  65.322  73.943  0.00  0.00      MON1  
ATOM   1835  HB1 PRO M 119      60.048  64.535  74.588  0.00  0.00      MON1  
ATOM   1836  HB2 PRO M 119      61.599  65.240  73.964  0.00  0.00      MON1  
ATOM   1837  CG  PRO M 119      60.035  65.212  72.488  0.00  0.00      MON1  
ATOM   1838  HG1 PRO M 119      60.635  64.494  71.895  0.00  0.00      MON1  
ATOM   1839  HG2 PRO M 119      58.965  64.906  72.455  0.00  0.00      MON1  
ATOM   1840  C   PRO M 119      60.896  67.334  75.408  0.00  0.00      MON1  
ATOM   1841  O   PRO M 119      60.536  67.260  76.569  0.00  0.00      MON1  
ATOM   1842  N   VAL M 120      62.028  67.953  75.049  0.00  0.00      MON1  
ATOM   1843  HN  VAL M 120      62.286  67.998  74.087  0.00  0.00      MON1  
ATOM   1844  CA  VAL M 120      62.885  68.626  76.002  0.00  0.00      MON1  
ATOM   1845  HA  VAL M 120      63.139  67.929  76.788  0.00  0.00      MON1  
ATOM   1846  CB  VAL M 120      64.156  69.131  75.359  0.00  0.00      MON1  
ATOM   1847  HB  VAL M 120      63.919  69.863  74.555  0.00  0.00      MON1  
ATOM   1848  CG1 VAL M 120      65.026  69.838  76.418  0.00  0.00      MON1  
ATOM   1849 HG11 VAL M 120      65.132  69.210  77.328  0.00  0.00      MON1  
ATOM   1850 HG12 VAL M 120      64.598  70.818  76.710  0.00  0.00      MON1  
ATOM   1851 HG13 VAL M 120      66.041  70.032  76.014  0.00  0.00      MON1  
ATOM   1852  CG2 VAL M 120      64.888  67.949  74.705  0.00  0.00      MON1  
ATOM   1853 HG21 VAL M 120      64.236  67.090  74.454  0.00  0.00      MON1  
ATOM   1854 HG22 VAL M 120      65.691  67.578  75.376  0.00  0.00      MON1  
ATOM   1855 HG23 VAL M 120      65.337  68.286  73.752  0.00  0.00      MON1  
ATOM   1856  C   VAL M 120      62.199  69.806  76.654  0.00  0.00      MON1  
ATOM   1857  O   VAL M 120      62.278  69.987  77.864  0.00  0.00      MON1  
ATOM   1858  N   ILE M 121      61.498  70.653  75.863  0.00  0.00      MON1  
ATOM   1859  HN  ILE M 121      61.499  70.502  74.871  0.00  0.00      MON1  
ATOM   1860  CA  ILE M 121      60.695  71.792  76.330  0.00  0.00      MON1  
ATOM   1861  HA  ILE M 121      61.337  72.427  76.923  0.00  0.00      MON1  
ATOM   1862  CB  ILE M 121      60.087  72.590  75.167  0.00  0.00      MON1  
ATOM   1863  HB  ILE M 121      59.477  71.882  74.556  0.00  0.00      MON1  
ATOM   1864  CG2 ILE M 121      59.168  73.723  75.671  0.00  0.00      MON1  
ATOM   1865 HG21 ILE M 121      59.736  74.377  76.363  0.00  0.00      MON1  
ATOM   1866 HG22 ILE M 121      58.269  73.338  76.194  0.00  0.00      MON1  
ATOM   1867 HG23 ILE M 121      58.821  74.342  74.819  0.00  0.00      MON1  
ATOM   1868  CG1 ILE M 121      61.167  73.193  74.241  0.00  0.00      MON1  
ATOM   1869 HG11 ILE M 121      62.020  72.493  74.151  0.00  0.00      MON1  
ATOM   1870 HG12 ILE M 121      61.578  74.121  74.697  0.00  0.00      MON1  
ATOM   1871  CD  ILE M 121      60.620  73.482  72.836  0.00  0.00      MON1  
ATOM   1872  HD1 ILE M 121      59.893  72.700  72.534  0.00  0.00      MON1  
ATOM   1873  HD2 ILE M 121      61.449  73.472  72.100  0.00  0.00      MON1  
ATOM   1874  HD3 ILE M 121      60.106  74.467  72.812  0.00  0.00      MON1  
ATOM   1875  C   ILE M 121      59.573  71.341  77.264  0.00  0.00      MON1  
ATOM   1876  O   ILE M 121      59.257  71.976  78.270  0.00  0.00      MON1  
ATOM   1877  N   LEU M 122      58.951  70.200  76.941  0.00  0.00      MON1  
ATOM   1878  HN  LEU M 122      59.159  69.771  76.057  0.00  0.00      MON1  
ATOM   1879  CA  LEU M 122      57.988  69.496  77.760  0.00  0.00      MON1  
ATOM   1880  HA  LEU M 122      57.266  70.221  78.104  0.00  0.00      MON1  
ATOM   1881  CB  LEU M 122      57.261  68.472  76.876  0.00  0.00      MON1  
ATOM   1882  HB1 LEU M 122      56.602  67.810  77.468  0.00  0.00      MON1  
ATOM   1883  HB2 LEU M 122      58.021  67.820  76.394  0.00  0.00      MON1  
ATOM   1884  CG  LEU M 122      56.420  69.145  75.773  0.00  0.00      MON1  
ATOM   1885  HG  LEU M 122      57.089  69.841  75.221  0.00  0.00      MON1  
ATOM   1886  CD1 LEU M 122      55.936  68.071  74.820  0.00  0.00      MON1  
ATOM   1887 HD11 LEU M 122      55.352  67.297  75.361  0.00  0.00      MON1  
ATOM   1888 HD12 LEU M 122      56.802  67.584  74.320  0.00  0.00      MON1  
ATOM   1889 HD13 LEU M 122      55.289  68.542  74.053  0.00  0.00      MON1  
ATOM   1890  CD2 LEU M 122      55.202  69.960  76.236  0.00  0.00      MON1  
ATOM   1891 HD21 LEU M 122      55.455  70.634  77.079  0.00  0.00      MON1  
ATOM   1892 HD22 LEU M 122      54.380  69.281  76.533  0.00  0.00      MON1  
ATOM   1893 HD23 LEU M 122      54.811  70.581  75.411  0.00  0.00      MON1  
ATOM   1894  C   LEU M 122      58.556  68.877  79.032  0.00  0.00      MON1  
ATOM   1895  O   LEU M 122      57.897  68.892  80.066  0.00  0.00      MON1  
ATOM   1896  N   ILE M 123      59.799  68.357  79.016  0.00  0.00      MON1  
ATOM   1897  HN  ILE M 123      60.269  68.224  78.139  0.00  0.00      MON1  
ATOM   1898  CA  ILE M 123      60.518  67.937  80.205  0.00  0.00      MON1  
ATOM   1899  HA  ILE M 123      59.897  67.246  80.758  0.00  0.00      MON1  
ATOM   1900  CB  ILE M 123      61.843  67.281  79.872  0.00  0.00      MON1  
ATOM   1901  HB  ILE M 123      62.444  67.941  79.206  0.00  0.00      MON1  
ATOM   1902  CG2 ILE M 123      62.624  67.074  81.184  0.00  0.00      MON1  
ATOM   1903 HG21 ILE M 123      62.053  66.451  81.899  0.00  0.00      MON1  
ATOM   1904 HG22 ILE M 123      62.918  68.022  81.683  0.00  0.00      MON1  
ATOM   1905 HG23 ILE M 123      63.595  66.613  80.938  0.00  0.00      MON1  
ATOM   1906  CG1 ILE M 123      61.620  65.946  79.133  0.00  0.00      MON1  
ATOM   1907 HG11 ILE M 123      60.846  65.999  78.358  0.00  0.00      MON1  
ATOM   1908 HG12 ILE M 123      61.203  65.244  79.894  0.00  0.00      MON1  
ATOM   1909  CD  ILE M 123      62.891  65.304  78.567  0.00  0.00      MON1  
ATOM   1910  HD1 ILE M 123      63.730  65.305  79.284  0.00  0.00      MON1  
ATOM   1911  HD2 ILE M 123      63.224  65.864  77.666  0.00  0.00      MON1  
ATOM   1912  HD3 ILE M 123      62.690  64.256  78.257  0.00  0.00      MON1  
ATOM   1913  C   ILE M 123      60.789  69.109  81.103  0.00  0.00      MON1  
ATOM   1914  O   ILE M 123      60.635  69.042  82.323  0.00  0.00      MON1  
ATOM   1915  N   HSE M 124      61.208  70.235  80.493  0.00  0.00      MON1  
ATOM   1916  HN  HSE M 124      61.419  70.216  79.511  0.00  0.00      MON1  
ATOM   1917  CA  HSE M 124      61.461  71.462  81.208  0.00  0.00      MON1  
ATOM   1918  HA  HSE M 124      62.198  71.261  81.973  0.00  0.00      MON1  
ATOM   1919  CB  HSE M 124      61.972  72.579  80.266  0.00  0.00      MON1  
ATOM   1920  HB1 HSE M 124      61.237  72.810  79.472  0.00  0.00      MON1  
ATOM   1921  HB2 HSE M 124      62.884  72.203  79.759  0.00  0.00      MON1  
ATOM   1922  ND1 HSE M 124      63.389  74.634  80.472  0.00  0.00      MON1  
ATOM   1923  CG  HSE M 124      62.331  73.884  80.941  0.00  0.00      MON1  
ATOM   1924  CE1 HSE M 124      63.456  75.696  81.263  0.00  0.00      MON1  
ATOM   1925  HE1 HSE M 124      64.241  76.457  81.224  0.00  0.00      MON1  
ATOM   1926  NE2 HSE M 124      62.482  75.680  82.195  0.00  0.00      MON1  
ATOM   1927  HE2 HSE M 124      62.311  76.347  82.932  0.00  0.00      MON1  
ATOM   1928  CD2 HSE M 124      61.759  74.531  81.993  0.00  0.00      MON1  
ATOM   1929  HD2 HSE M 124      60.883  74.342  82.588  0.00  0.00      MON1  
ATOM   1930  C   HSE M 124      60.197  71.916  81.881  0.00  0.00      MON1  
ATOM   1931  O   HSE M 124      60.190  72.242  83.064  0.00  0.00      MON1  
ATOM   1932  N   LEU M 125      59.072  71.867  81.145  0.00  0.00      MON1  
ATOM   1933  HN  LEU M 125      59.116  71.623  80.173  0.00  0.00      MON1  
ATOM   1934  CA  LEU M 125      57.779  72.249  81.650  0.00  0.00      MON1  
ATOM   1935  HA  LEU M 125      57.858  73.270  81.994  0.00  0.00      MON1  
ATOM   1936  CB  LEU M 125      56.689  72.126  80.568  0.00  0.00      MON1  
ATOM   1937  HB1 LEU M 125      56.599  71.066  80.245  0.00  0.00      MON1  
ATOM   1938  HB2 LEU M 125      56.999  72.716  79.677  0.00  0.00      MON1  
ATOM   1939  CG  LEU M 125      55.309  72.623  81.031  0.00  0.00      MON1  
ATOM   1940  HG  LEU M 125      55.031  72.100  81.966  0.00  0.00      MON1  
ATOM   1941  CD1 LEU M 125      55.329  74.128  81.323  0.00  0.00      MON1  
ATOM   1942 HD11 LEU M 125      55.543  74.707  80.401  0.00  0.00      MON1  
ATOM   1943 HD12 LEU M 125      56.072  74.389  82.104  0.00  0.00      MON1  
ATOM   1944 HD13 LEU M 125      54.329  74.414  81.697  0.00  0.00      MON1  
ATOM   1945  CD2 LEU M 125      54.212  72.254  80.026  0.00  0.00      MON1  
ATOM   1946 HD21 LEU M 125      54.167  71.154  79.882  0.00  0.00      MON1  
ATOM   1947 HD22 LEU M 125      54.411  72.732  79.043  0.00  0.00      MON1  
ATOM   1948 HD23 LEU M 125      53.222  72.605  80.390  0.00  0.00      MON1  
ATOM   1949  C   LEU M 125      57.382  71.408  82.830  0.00  0.00      MON1  
ATOM   1950  O   LEU M 125      56.807  71.888  83.801  0.00  0.00      MON1  
ATOM   1951  N   SER M 126      57.705  70.110  82.788  0.00  0.00      MON1  
ATOM   1952  HN  SER M 126      58.081  69.697  81.954  0.00  0.00      MON1  
ATOM   1953  CA  SER M 126      57.387  69.200  83.859  0.00  0.00      MON1  
ATOM   1954  HA  SER M 126      56.329  69.271  84.066  0.00  0.00      MON1  
ATOM   1955  CB  SER M 126      57.718  67.742  83.509  0.00  0.00      MON1  
ATOM   1956  HB1 SER M 126      57.515  67.094  84.391  0.00  0.00      MON1  
ATOM   1957  HB2 SER M 126      58.790  67.635  83.235  0.00  0.00      MON1  
ATOM   1958  OG  SER M 126      56.914  67.312  82.418  0.00  0.00      MON1  
ATOM   1959  HG1 SER M 126      56.614  66.426  82.659  0.00  0.00      MON1  
ATOM   1960  C   SER M 126      58.112  69.526  85.133  0.00  0.00      MON1  
ATOM   1961  O   SER M 126      57.646  69.177  86.211  0.00  0.00      MON1  
ATOM   1962  N   ASN M 127      59.252  70.229  85.062  0.00  0.00      MON1  
ATOM   1963  HN  ASN M 127      59.620  70.526  84.178  0.00  0.00      MON1  
ATOM   1964  CA  ASN M 127      59.936  70.636  86.261  0.00  0.00      MON1  
ATOM   1965  HA  ASN M 127      59.264  70.565  87.110  0.00  0.00      MON1  
ATOM   1966  CB  ASN M 127      61.187  69.783  86.510  0.00  0.00      MON1  
ATOM   1967  HB1 ASN M 127      62.059  70.071  85.892  0.00  0.00      MON1  
ATOM   1968  HB2 ASN M 127      60.925  68.731  86.254  0.00  0.00      MON1  
ATOM   1969  CG  ASN M 127      61.528  69.875  87.989  0.00  0.00      MON1  
ATOM   1970  OD1 ASN M 127      61.436  70.920  88.635  0.00  0.00      MON1  
ATOM   1971  ND2 ASN M 127      61.884  68.710  88.556  0.00  0.00      MON1  
ATOM   1972 HD21 ASN M 127      62.419  68.746  89.401  0.00  0.00      MON1  
ATOM   1973 HD22 ASN M 127      61.966  67.906  87.975  0.00  0.00      MON1  
ATOM   1974  C   ASN M 127      60.297  72.084  86.146  0.00  0.00      MON1  
ATOM   1975  O   ASN M 127      61.458  72.453  85.979  0.00  0.00      MON1  
ATOM   1976  N   VAL M 128      59.287  72.960  86.226  0.00  0.00      MON1  
ATOM   1977  HN  VAL M 128      58.342  72.639  86.350  0.00  0.00      MON1  
ATOM   1978  CA  VAL M 128      59.457  74.378  86.043  0.00  0.00      MON1  
ATOM   1979  HA  VAL M 128      59.903  74.540  85.070  0.00  0.00      MON1  
ATOM   1980  CB  VAL M 128      58.129  75.101  86.104  0.00  0.00      MON1  
ATOM   1981  HB  VAL M 128      57.642  74.972  87.100  0.00  0.00      MON1  
ATOM   1982  CG1 VAL M 128      58.378  76.575  85.843  0.00  0.00      MON1  
ATOM   1983 HG11 VAL M 128      58.908  76.739  84.880  0.00  0.00      MON1  
ATOM   1984 HG12 VAL M 128      58.988  76.954  86.677  0.00  0.00      MON1  
ATOM   1985 HG13 VAL M 128      57.421  77.141  85.818  0.00  0.00      MON1  
ATOM   1986  CG2 VAL M 128      57.178  74.584  85.027  0.00  0.00      MON1  
ATOM   1987 HG21 VAL M 128      56.620  73.692  85.318  0.00  0.00      MON1  
ATOM   1988 HG22 VAL M 128      57.725  74.382  84.081  0.00  0.00      MON1  
ATOM   1989 HG23 VAL M 128      56.407  75.356  84.807  0.00  0.00      MON1  
ATOM   1990  C   VAL M 128      60.385  74.972  87.068  0.00  0.00      MON1  
ATOM   1991  O   VAL M 128      61.199  75.849  86.773  0.00  0.00      MON1  
ATOM   1992  N   THR M 129      60.263  74.498  88.322  0.00  0.00      MON1  
ATOM   1993  HN  THR M 129      59.647  73.741  88.524  0.00  0.00      MON1  
ATOM   1994  CA  THR M 129      61.073  74.976  89.404  0.00  0.00      MON1  
ATOM   1995  HA  THR M 129      60.962  75.981  89.191  0.00  0.00      MON1  
ATOM   1996  CB  THR M 129      60.622  74.548  90.790  0.00  0.00      MON1  
ATOM   1997  HB  THR M 129      61.255  74.996  91.590  0.00  0.00      MON1  
ATOM   1998  OG1 THR M 129      60.712  73.139  90.916  0.00  0.00      MON1  
ATOM   1999  HG1 THR M 129      59.944  72.857  91.433  0.00  0.00      MON1  
ATOM   2000  CG2 THR M 129      59.167  74.975  90.995  0.00  0.00      MON1  
ATOM   2001 HG21 THR M 129      58.525  74.500  90.230  0.00  0.00      MON1  
ATOM   2002 HG22 THR M 129      59.055  76.073  90.902  0.00  0.00      MON1  
ATOM   2003 HG23 THR M 129      58.821  74.675  92.005  0.00  0.00      MON1  
ATOM   2004  C   THR M 129      62.526  74.653  89.262  0.00  0.00      MON1  
ATOM   2005  O   THR M 129      63.414  75.395  89.669  0.00  0.00      MON1  
ATOM   2006  N   GLY M 130      62.781  73.468  88.697  0.00  0.00      MON1  
ATOM   2007  HN  GLY M 130      62.022  72.855  88.452  0.00  0.00      MON1  
ATOM   2008  CA  GLY M 130      64.104  72.944  88.473  0.00  0.00      MON1  
ATOM   2009  HA1 GLY M 130      64.790  73.750  88.256  0.00  0.00      MON1  
ATOM   2010  HA2 GLY M 130      64.039  72.213  87.681  0.00  0.00      MON1  
ATOM   2011  C   GLY M 130      64.597  72.242  89.693  0.00  0.00      MON1  
ATOM   2012  O   GLY M 130      65.659  71.625  89.680  0.00  0.00      MON1  
ATOM   2013  N   LEU M 131      63.849  72.325  90.807  0.00  0.00      MON1  
ATOM   2014  HN  LEU M 131      62.972  72.803  90.795  0.00  0.00      MON1  
ATOM   2015  CA  LEU M 131      64.312  71.755  92.042  0.00  0.00      MON1  
ATOM   2016  HA  LEU M 131      65.359  71.993  92.168  0.00  0.00      MON1  
ATOM   2017  CB  LEU M 131      63.511  72.237  93.242  0.00  0.00      MON1  
ATOM   2018  HB1 LEU M 131      63.875  71.715  94.163  0.00  0.00      MON1  
ATOM   2019  HB2 LEU M 131      62.426  72.007  93.128  0.00  0.00      MON1  
ATOM   2020  CG  LEU M 131      63.675  73.722  93.495  0.00  0.00      MON1  
ATOM   2021  HG  LEU M 131      63.016  74.286  92.793  0.00  0.00      MON1  
ATOM   2022  CD1 LEU M 131      63.206  73.896  94.909  0.00  0.00      MON1  
ATOM   2023 HD11 LEU M 131      64.025  73.697  95.634  0.00  0.00      MON1  
ATOM   2024 HD12 LEU M 131      62.388  73.193  95.151  0.00  0.00      MON1  
ATOM   2025 HD13 LEU M 131      62.838  74.911  94.994  0.00  0.00      MON1  
ATOM   2026  CD2 LEU M 131      65.110  74.239  93.329  0.00  0.00      MON1  
ATOM   2027 HD21 LEU M 131      65.444  74.176  92.272  0.00  0.00      MON1  
ATOM   2028 HD22 LEU M 131      65.816  73.672  93.970  0.00  0.00      MON1  
ATOM   2029 HD23 LEU M 131      65.168  75.311  93.615  0.00  0.00      MON1  
ATOM   2030  C   LEU M 131      64.241  70.278  92.111  0.00  0.00      MON1  
ATOM   2031  O   LEU M 131      65.190  69.622  92.535  0.00  0.00      MON1  
ATOM   2032  N   SER M 132      63.093  69.715  91.753  0.00  0.00      MON1  
ATOM   2033  HN  SER M 132      62.334  70.244  91.382  0.00  0.00      MON1  
ATOM   2034  CA  SER M 132      62.880  68.352  92.144  0.00  0.00      MON1  
ATOM   2035  HA  SER M 132      63.405  68.139  93.067  0.00  0.00      MON1  
ATOM   2036  CB  SER M 132      61.417  68.071  92.446  0.00  0.00      MON1  
ATOM   2037  HB1 SER M 132      61.208  66.992  92.614  0.00  0.00      MON1  
ATOM   2038  HB2 SER M 132      60.847  68.487  91.582  0.00  0.00      MON1  
ATOM   2039  OG  SER M 132      60.975  68.753  93.607  0.00  0.00      MON1  
ATOM   2040  HG1 SER M 132      60.155  68.293  93.867  0.00  0.00      MON1  
ATOM   2041  C   SER M 132      63.392  67.367  91.149  0.00  0.00      MON1  
ATOM   2042  O   SER M 132      63.847  67.692  90.057  0.00  0.00      MON1  
ATOM   2043  N   ASP M 133      63.296  66.105  91.555  0.00  0.00      MON1  
ATOM   2044  HN  ASP M 133      63.080  65.881  92.500  0.00  0.00      MON1  
ATOM   2045  CA  ASP M 133      63.348  64.967  90.691  0.00  0.00      MON1  
ATOM   2046  HA  ASP M 133      63.727  65.218  89.707  0.00  0.00      MON1  
ATOM   2047  CB  ASP M 133      64.138  63.820  91.346  0.00  0.00      MON1  
ATOM   2048  HB1 ASP M 133      64.113  62.911  90.711  0.00  0.00      MON1  
ATOM   2049  HB2 ASP M 133      63.727  63.590  92.352  0.00  0.00      MON1  
ATOM   2050  CG  ASP M 133      65.582  64.244  91.511  0.00  0.00      MON1  
ATOM   2051  OD1 ASP M 133      66.080  65.049  90.684  0.00  0.00      MON1  
ATOM   2052  OD2 ASP M 133      66.235  63.710  92.445  0.00  0.00      MON1  
ATOM   2053  C   ASP M 133      61.894  64.603  90.598  0.00  0.00      MON1  
ATOM   2054  O   ASP M 133      61.454  63.567  91.089  0.00  0.00      MON1  
ATOM   2055  N   ASP M 134      61.086  65.527  90.042  0.00  0.00      MON1  
ATOM   2056  HN  ASP M 134      61.455  66.358  89.645  0.00  0.00      MON1  
ATOM   2057  CA  ASP M 134      59.650  65.424  90.138  0.00  0.00      MON1  
ATOM   2058  HA  ASP M 134      59.382  64.629  90.826  0.00  0.00      MON1  
ATOM   2059  CB  ASP M 134      59.004  66.730  90.623  0.00  0.00      MON1  
ATOM   2060  HB1 ASP M 134      58.913  67.545  89.884  0.00  0.00      MON1  
ATOM   2061  HB2 ASP M 134      59.574  67.060  91.477  0.00  0.00      MON1  
ATOM   2062  CG  ASP M 134      57.679  66.438  91.290  0.00  0.00      MON1  
ATOM   2063  OD1 ASP M 134      56.919  65.576  90.792  0.00  0.00      MON1  
ATOM   2064  OD2 ASP M 134      57.443  67.033  92.374  0.00  0.00      MON1  
ATOM   2065  C   ASP M 134      59.053  65.064  88.822  0.00  0.00      MON1  
ATOM   2066  O   ASP M 134      58.280  65.824  88.242  0.00  0.00      MON1  
ATOM   2067  N   TYR M 135      59.385  63.884  88.287  0.00  0.00      MON1  
ATOM   2068  HN  TYR M 135      59.983  63.245  88.763  0.00  0.00      MON1  
ATOM   2069  CA  TYR M 135      58.726  63.496  87.068  0.00  0.00      MON1  
ATOM   2070  HA  TYR M 135      58.189  64.327  86.633  0.00  0.00      MON1  
ATOM   2071  CB  TYR M 135      59.596  62.984  85.930  0.00  0.00      MON1  
ATOM   2072  HB1 TYR M 135      58.963  63.060  85.012  0.00  0.00      MON1  
ATOM   2073  HB2 TYR M 135      59.801  61.939  85.893  0.00  0.00      MON1  
ATOM   2074  CG  TYR M 135      60.747  63.902  85.707  0.00  0.00      MON1  
ATOM   2075  CD1 TYR M 135      60.512  65.025  84.921  0.00  0.00      MON1  
ATOM   2076  HD1 TYR M 135      59.555  65.175  84.449  0.00  0.00      MON1  
ATOM   2077  CE1 TYR M 135      61.494  66.012  84.775  0.00  0.00      MON1  
ATOM   2078  HE1 TYR M 135      61.291  66.893  84.184  0.00  0.00      MON1  
ATOM   2079  CZ  TYR M 135      62.711  65.892  85.472  0.00  0.00      MON1  
ATOM   2080  OH  TYR M 135      63.690  66.893  85.358  0.00  0.00      MON1  
ATOM   2081  HH  TYR M 135      63.425  67.508  84.667  0.00  0.00      MON1  
ATOM   2082  CD2 TYR M 135      61.976  63.774  86.328  0.00  0.00      MON1  
ATOM   2083  HD2 TYR M 135      61.940  63.057  87.089  0.00  0.00      MON1  
ATOM   2084  CE2 TYR M 135      62.999  64.716  86.188  0.00  0.00      MON1  
ATOM   2085  HE2 TYR M 135      63.928  64.612  86.727  0.00  0.00      MON1  
ATOM   2086  C   TYR M 135      57.696  62.492  87.436  0.00  0.00      MON1  
ATOM   2087  O   TYR M 135      57.961  61.447  87.991  0.00  0.00      MON1  
ATOM   2088  N   GLY M 136      56.434  62.818  87.217  0.00  0.00      MON1  
ATOM   2089  HN  GLY M 136      56.190  63.744  86.945  0.00  0.00      MON1  
ATOM   2090  CA  GLY M 136      55.389  61.876  87.531  0.00  0.00      MON1  
ATOM   2091  HA1 GLY M 136      54.560  62.452  87.915  0.00  0.00      MON1  
ATOM   2092  HA2 GLY M 136      55.703  61.117  88.237  0.00  0.00      MON1  
ATOM   2093  C   GLY M 136      54.931  61.186  86.296  0.00  0.00      MON1  
ATOM   2094  O   GLY M 136      55.567  61.199  85.241  0.00  0.00      MON1  
ATOM   2095  N   ARG M 137      53.737  60.593  86.415  0.00  0.00      MON1  
ATOM   2096  HN  ARG M 137      53.362  60.493  87.343  0.00  0.00      MON1  
ATOM   2097  CA  ARG M 137      53.012  59.974  85.330  0.00  0.00      MON1  
ATOM   2098  HA  ARG M 137      53.635  59.217  84.871  0.00  0.00      MON1  
ATOM   2099  CB  ARG M 137      51.705  59.369  85.830  0.00  0.00      MON1  
ATOM   2100  HB1 ARG M 137      51.198  60.169  86.405  0.00  0.00      MON1  
ATOM   2101  HB2 ARG M 137      51.951  58.560  86.557  0.00  0.00      MON1  
ATOM   2102  CG  ARG M 137      50.775  58.794  84.731  0.00  0.00      MON1  
ATOM   2103  HG1 ARG M 137      51.223  57.842  84.362  0.00  0.00      MON1  
ATOM   2104  HG2 ARG M 137      50.637  59.455  83.852  0.00  0.00      MON1  
ATOM   2105  CD  ARG M 137      49.420  58.505  85.351  0.00  0.00      MON1  
ATOM   2106  HD1 ARG M 137      49.785  58.058  86.306  0.00  0.00      MON1  
ATOM   2107  HD2 ARG M 137      48.734  57.727  85.048  0.00  0.00      MON1  
ATOM   2108  NE  ARG M 137      48.669  59.795  85.517  0.00  0.00      MON1  
ATOM   2109  HE  ARG M 137      48.235  60.235  84.744  0.00  0.00      MON1  
ATOM   2110  CZ  ARG M 137      48.597  60.359  86.719  0.00  0.00      MON1  
ATOM   2111  NH1 ARG M 137      49.109  59.774  87.781  0.00  0.00      MON1  
ATOM   2112 HH11 ARG M 137      49.026  58.757  87.759  0.00  0.00      MON1  
ATOM   2113 HH12 ARG M 137      49.055  60.195  88.675  0.00  0.00      MON1  
ATOM   2114  NH2 ARG M 137      47.984  61.510  86.906  0.00  0.00      MON1  
ATOM   2115 HH21 ARG M 137      47.340  61.776  86.206  0.00  0.00      MON1  
ATOM   2116 HH22 ARG M 137      47.746  61.702  87.862  0.00  0.00      MON1  
ATOM   2117  C   ARG M 137      52.650  60.974  84.281  0.00  0.00      MON1  
ATOM   2118  O   ARG M 137      52.665  60.694  83.086  0.00  0.00      MON1  
ATOM   2119  N   ARG M 138      52.311  62.200  84.731  0.00  0.00      MON1  
ATOM   2120  HN  ARG M 138      52.345  62.369  85.711  0.00  0.00      MON1  
ATOM   2121  CA  ARG M 138      51.881  63.267  83.864  0.00  0.00      MON1  
ATOM   2122  HA  ARG M 138      50.972  62.967  83.361  0.00  0.00      MON1  
ATOM   2123  CB  ARG M 138      51.673  64.561  84.671  0.00  0.00      MON1  
ATOM   2124  HB1 ARG M 138      52.619  64.841  85.190  0.00  0.00      MON1  
ATOM   2125  HB2 ARG M 138      50.928  64.327  85.463  0.00  0.00      MON1  
ATOM   2126  CG  ARG M 138      51.192  65.747  83.817  0.00  0.00      MON1  
ATOM   2127  HG1 ARG M 138      50.227  65.489  83.331  0.00  0.00      MON1  
ATOM   2128  HG2 ARG M 138      51.918  65.962  82.999  0.00  0.00      MON1  
ATOM   2129  CD  ARG M 138      51.047  67.039  84.613  0.00  0.00      MON1  
ATOM   2130  HD1 ARG M 138      50.659  67.836  83.938  0.00  0.00      MON1  
ATOM   2131  HD2 ARG M 138      52.028  67.328  85.060  0.00  0.00      MON1  
ATOM   2132  NE  ARG M 138      50.052  66.807  85.699  0.00  0.00      MON1  
ATOM   2133  HE  ARG M 138      49.755  65.883  85.893  0.00  0.00      MON1  
ATOM   2134  CZ  ARG M 138      49.688  67.769  86.535  0.00  0.00      MON1  
ATOM   2135  NH1 ARG M 138      50.168  68.990  86.442  0.00  0.00      MON1  
ATOM   2136 HH11 ARG M 138      50.750  69.185  85.668  0.00  0.00      MON1  
ATOM   2137 HH12 ARG M 138      50.565  69.326  87.323  0.00  0.00      MON1  
ATOM   2138  NH2 ARG M 138      48.893  67.492  87.547  0.00  0.00      MON1  
ATOM   2139 HH21 ARG M 138      49.052  68.130  88.288  0.00  0.00      MON1  
ATOM   2140 HH22 ARG M 138      48.744  66.538  87.766  0.00  0.00      MON1  
ATOM   2141  C   ARG M 138      52.911  63.553  82.815  0.00  0.00      MON1  
ATOM   2142  O   ARG M 138      52.583  63.701  81.642  0.00  0.00      MON1  
ATOM   2143  N   THR M 139      54.192  63.584  83.229  0.00  0.00      MON1  
ATOM   2144  HN  THR M 139      54.435  63.421  84.181  0.00  0.00      MON1  
ATOM   2145  CA  THR M 139      55.297  63.878  82.347  0.00  0.00      MON1  
ATOM   2146  HA  THR M 139      55.143  64.856  81.913  0.00  0.00      MON1  
ATOM   2147  CB  THR M 139      56.642  63.824  83.040  0.00  0.00      MON1  
ATOM   2148  HB  THR M 139      56.835  62.811  83.469  0.00  0.00      MON1  
ATOM   2149  OG1 THR M 139      56.654  64.754  84.110  0.00  0.00      MON1  
ATOM   2150  HG1 THR M 139      57.447  64.571  84.623  0.00  0.00      MON1  
ATOM   2151  CG2 THR M 139      57.756  64.192  82.042  0.00  0.00      MON1  
ATOM   2152 HG21 THR M 139      57.497  65.094  81.451  0.00  0.00      MON1  
ATOM   2153 HG22 THR M 139      57.939  63.364  81.325  0.00  0.00      MON1  
ATOM   2154 HG23 THR M 139      58.715  64.379  82.565  0.00  0.00      MON1  
ATOM   2155  C   THR M 139      55.355  62.895  81.235  0.00  0.00      MON1  
ATOM   2156  O   THR M 139      55.467  63.279  80.085  0.00  0.00      MON1  
ATOM   2157  N   MET M 140      55.203  61.599  81.542  0.00  0.00      MON1  
ATOM   2158  HN  MET M 140      55.048  61.295  82.479  0.00  0.00      MON1  
ATOM   2159  CA  MET M 140      55.257  60.572  80.536  0.00  0.00      MON1  
ATOM   2160  HA  MET M 140      56.201  60.643  80.015  0.00  0.00      MON1  
ATOM   2161  CB  MET M 140      55.050  59.179  81.139  0.00  0.00      MON1  
ATOM   2162  HB1 MET M 140      55.248  58.486  80.299  0.00  0.00      MON1  
ATOM   2163  HB2 MET M 140      54.011  59.014  81.504  0.00  0.00      MON1  
ATOM   2164  CG  MET M 140      56.010  58.887  82.278  0.00  0.00      MON1  
ATOM   2165  HG1 MET M 140      55.861  57.856  82.665  0.00  0.00      MON1  
ATOM   2166  HG2 MET M 140      55.786  59.568  83.130  0.00  0.00      MON1  
ATOM   2167  SD  MET M 140      57.706  59.118  81.702  0.00  0.00      MON1  
ATOM   2168  CE  MET M 140      58.255  59.254  83.321  0.00  0.00      MON1  
ATOM   2169  HE1 MET M 140      57.643  58.496  83.803  0.00  0.00      MON1  
ATOM   2170  HE2 MET M 140      58.007  60.242  83.765  0.00  0.00      MON1  
ATOM   2171  HE3 MET M 140      59.341  59.134  83.283  0.00  0.00      MON1  
ATOM   2172  C   MET M 140      54.185  60.742  79.520  0.00  0.00      MON1  
ATOM   2173  O   MET M 140      54.428  60.677  78.322  0.00  0.00      MON1  
ATOM   2174  N   GLY M 141      52.961  61.033  79.995  0.00  0.00      MON1  
ATOM   2175  HN  GLY M 141      52.822  61.089  80.985  0.00  0.00      MON1  
ATOM   2176  CA  GLY M 141      51.836  61.235  79.114  0.00  0.00      MON1  
ATOM   2177  HA1 GLY M 141      50.974  61.458  79.721  0.00  0.00      MON1  
ATOM   2178  HA2 GLY M 141      51.715  60.362  78.486  0.00  0.00      MON1  
ATOM   2179  C   GLY M 141      52.074  62.404  78.224  0.00  0.00      MON1  
ATOM   2180  O   GLY M 141      51.756  62.365  77.042  0.00  0.00      MON1  
ATOM   2181  N   LEU M 142      52.666  63.475  78.779  0.00  0.00      MON1  
ATOM   2182  HN  LEU M 142      52.912  63.486  79.750  0.00  0.00      MON1  
ATOM   2183  CA  LEU M 142      52.948  64.650  78.003  0.00  0.00      MON1  
ATOM   2184  HA  LEU M 142      52.030  64.954  77.522  0.00  0.00      MON1  
ATOM   2185  CB  LEU M 142      53.506  65.785  78.885  0.00  0.00      MON1  
ATOM   2186  HB1 LEU M 142      54.542  65.550  79.213  0.00  0.00      MON1  
ATOM   2187  HB2 LEU M 142      52.882  65.857  79.803  0.00  0.00      MON1  
ATOM   2188  CG  LEU M 142      53.481  67.157  78.187  0.00  0.00      MON1  
ATOM   2189  HG  LEU M 142      53.945  67.064  77.177  0.00  0.00      MON1  
ATOM   2190  CD1 LEU M 142      52.047  67.664  78.024  0.00  0.00      MON1  
ATOM   2191 HD11 LEU M 142      51.613  67.864  79.023  0.00  0.00      MON1  
ATOM   2192 HD12 LEU M 142      51.415  66.937  77.477  0.00  0.00      MON1  
ATOM   2193 HD13 LEU M 142      52.044  68.620  77.457  0.00  0.00      MON1  
ATOM   2194  CD2 LEU M 142      54.304  68.169  78.989  0.00  0.00      MON1  
ATOM   2195 HD21 LEU M 142      55.361  67.851  79.090  0.00  0.00      MON1  
ATOM   2196 HD22 LEU M 142      53.894  68.239  80.020  0.00  0.00      MON1  
ATOM   2197 HD23 LEU M 142      54.258  69.187  78.563  0.00  0.00      MON1  
ATOM   2198  C   LEU M 142      53.930  64.337  76.907  0.00  0.00      MON1  
ATOM   2199  O   LEU M 142      53.749  64.725  75.755  0.00  0.00      MON1  
ATOM   2200  N   LEU M 143      54.994  63.582  77.248  0.00  0.00      MON1  
ATOM   2201  HN  LEU M 143      55.123  63.288  78.198  0.00  0.00      MON1  
ATOM   2202  CA  LEU M 143      56.006  63.210  76.292  0.00  0.00      MON1  
ATOM   2203  HA  LEU M 143      56.388  64.107  75.825  0.00  0.00      MON1  
ATOM   2204  CB  LEU M 143      57.156  62.399  76.928  0.00  0.00      MON1  
ATOM   2205  HB1 LEU M 143      57.904  62.146  76.141  0.00  0.00      MON1  
ATOM   2206  HB2 LEU M 143      56.768  61.443  77.347  0.00  0.00      MON1  
ATOM   2207  CG  LEU M 143      57.911  63.116  78.057  0.00  0.00      MON1  
ATOM   2208  HG  LEU M 143      57.252  63.283  78.907  0.00  0.00      MON1  
ATOM   2209  CD1 LEU M 143      59.032  62.222  78.590  0.00  0.00      MON1  
ATOM   2210 HD11 LEU M 143      59.689  61.942  77.742  0.00  0.00      MON1  
ATOM   2211 HD12 LEU M 143      58.618  61.294  79.037  0.00  0.00      MON1  
ATOM   2212 HD13 LEU M 143      59.634  62.754  79.357  0.00  0.00      MON1  
ATOM   2213  CD2 LEU M 143      58.400  64.513  77.665  0.00  0.00      MON1  
ATOM   2214 HD21 LEU M 143      57.555  65.166  77.361  0.00  0.00      MON1  
ATOM   2215 HD22 LEU M 143      59.127  64.456  76.828  0.00  0.00      MON1  
ATOM   2216 HD23 LEU M 143      58.900  64.997  78.531  0.00  0.00      MON1  
ATOM   2217  C   LEU M 143      55.450  62.356  75.197  0.00  0.00      MON1  
ATOM   2218  O   LEU M 143      55.652  62.630  74.023  0.00  0.00      MON1  
ATOM   2219  N   VAL M 144      54.694  61.311  75.559  0.00  0.00      MON1  
ATOM   2220  HN  VAL M 144      54.518  61.119  76.530  0.00  0.00      MON1  
ATOM   2221  CA  VAL M 144      54.168  60.386  74.591  0.00  0.00      MON1  
ATOM   2222  HA  VAL M 144      54.989  60.009  73.995  0.00  0.00      MON1  
ATOM   2223  CB  VAL M 144      53.457  59.237  75.249  0.00  0.00      MON1  
ATOM   2224  HB  VAL M 144      52.636  59.610  75.909  0.00  0.00      MON1  
ATOM   2225  CG1 VAL M 144      52.898  58.326  74.169  0.00  0.00      MON1  
ATOM   2226 HG11 VAL M 144      53.725  58.037  73.491  0.00  0.00      MON1  
ATOM   2227 HG12 VAL M 144      52.062  58.770  73.590  0.00  0.00      MON1  
ATOM   2228 HG13 VAL M 144      52.512  57.409  74.665  0.00  0.00      MON1  
ATOM   2229  CG2 VAL M 144      54.451  58.452  76.113  0.00  0.00      MON1  
ATOM   2230 HG21 VAL M 144      55.072  59.088  76.768  0.00  0.00      MON1  
ATOM   2231 HG22 VAL M 144      55.143  57.870  75.469  0.00  0.00      MON1  
ATOM   2232 HG23 VAL M 144      53.882  57.755  76.757  0.00  0.00      MON1  
ATOM   2233  C   VAL M 144      53.198  61.050  73.663  0.00  0.00      MON1  
ATOM   2234  O   VAL M 144      53.234  60.861  72.448  0.00  0.00      MON1  
ATOM   2235  N   SER M 145      52.293  61.873  74.208  0.00  0.00      MON1  
ATOM   2236  HN  SER M 145      52.272  62.082  75.192  0.00  0.00      MON1  
ATOM   2237  CA  SER M 145      51.308  62.532  73.389  0.00  0.00      MON1  
ATOM   2238  HA  SER M 145      50.777  61.781  72.822  0.00  0.00      MON1  
ATOM   2239  CB  SER M 145      50.296  63.322  74.227  0.00  0.00      MON1  
ATOM   2240  HB1 SER M 145      49.867  62.591  74.950  0.00  0.00      MON1  
ATOM   2241  HB2 SER M 145      49.471  63.719  73.592  0.00  0.00      MON1  
ATOM   2242  OG  SER M 145      50.904  64.389  74.953  0.00  0.00      MON1  
ATOM   2243  HG1 SER M 145      50.852  65.174  74.377  0.00  0.00      MON1  
ATOM   2244  C   SER M 145      51.952  63.460  72.409  0.00  0.00      MON1  
ATOM   2245  O   SER M 145      51.590  63.481  71.244  0.00  0.00      MON1  
ATOM   2246  N   ASP M 146      52.957  64.235  72.853  0.00  0.00      MON1  
ATOM   2247  HN  ASP M 146      53.204  64.209  73.828  0.00  0.00      MON1  
ATOM   2248  CA  ASP M 146      53.692  65.133  72.002  0.00  0.00      MON1  
ATOM   2249  HA  ASP M 146      52.958  65.759  71.512  0.00  0.00      MON1  
ATOM   2250  CB  ASP M 146      54.670  65.953  72.843  0.00  0.00      MON1  
ATOM   2251  HB1 ASP M 146      55.534  65.361  73.208  0.00  0.00      MON1  
ATOM   2252  HB2 ASP M 146      54.122  66.352  73.722  0.00  0.00      MON1  
ATOM   2253  CG  ASP M 146      55.107  67.129  72.003  0.00  0.00      MON1  
ATOM   2254  OD1 ASP M 146      54.342  67.996  71.636  0.00  0.00      MON1  
ATOM   2255  OD2 ASP M 146      56.431  67.122  71.707  0.00  0.00      MON1  
ATOM   2256  HD2 ASP M 146      56.676  67.968  71.284  0.00  0.00      MON1  
ATOM   2257  C   ASP M 146      54.458  64.435  70.901  0.00  0.00      MON1  
ATOM   2258  O   ASP M 146      54.458  64.900  69.763  0.00  0.00      MON1  
ATOM   2259  N   ILE M 147      55.099  63.289  71.197  0.00  0.00      MON1  
ATOM   2260  HN  ILE M 147      55.157  62.952  72.142  0.00  0.00      MON1  
ATOM   2261  CA  ILE M 147      55.778  62.542  70.164  0.00  0.00      MON1  
ATOM   2262  HA  ILE M 147      56.496  63.192  69.681  0.00  0.00      MON1  
ATOM   2263  CB  ILE M 147      56.492  61.327  70.700  0.00  0.00      MON1  
ATOM   2264  HB  ILE M 147      55.788  60.783  71.317  0.00  0.00      MON1  
ATOM   2265  CG2 ILE M 147      57.109  60.549  69.518  0.00  0.00      MON1  
ATOM   2266 HG21 ILE M 147      58.031  61.075  69.185  0.00  0.00      MON1  
ATOM   2267 HG22 ILE M 147      56.492  60.432  68.615  0.00  0.00      MON1  
ATOM   2268 HG23 ILE M 147      57.422  59.548  69.860  0.00  0.00      MON1  
ATOM   2269  CG1 ILE M 147      57.585  61.711  71.710  0.00  0.00      MON1  
ATOM   2270 HG11 ILE M 147      57.237  62.450  72.448  0.00  0.00      MON1  
ATOM   2271 HG12 ILE M 147      58.356  62.265  71.119  0.00  0.00      MON1  
ATOM   2272  CD  ILE M 147      58.314  60.585  72.429  0.00  0.00      MON1  
ATOM   2273  HD1 ILE M 147      58.754  59.865  71.712  0.00  0.00      MON1  
ATOM   2274  HD2 ILE M 147      57.671  60.126  73.207  0.00  0.00      MON1  
ATOM   2275  HD3 ILE M 147      59.178  61.017  72.981  0.00  0.00      MON1  
ATOM   2276  C   ILE M 147      54.782  62.111  69.110  0.00  0.00      MON1  
ATOM   2277  O   ILE M 147      55.028  62.277  67.922  0.00  0.00      MON1  
ATOM   2278  N   ALA M 148      53.600  61.608  69.517  0.00  0.00      MON1  
ATOM   2279  HN  ALA M 148      53.399  61.541  70.495  0.00  0.00      MON1  
ATOM   2280  CA  ALA M 148      52.506  61.260  68.628  0.00  0.00      MON1  
ATOM   2281  HA  ALA M 148      52.904  60.631  67.847  0.00  0.00      MON1  
ATOM   2282  CB  ALA M 148      51.494  60.420  69.425  0.00  0.00      MON1  
ATOM   2283  HB1 ALA M 148      51.072  61.017  70.261  0.00  0.00      MON1  
ATOM   2284  HB2 ALA M 148      51.992  59.528  69.861  0.00  0.00      MON1  
ATOM   2285  HB3 ALA M 148      50.668  60.068  68.771  0.00  0.00      MON1  
ATOM   2286  C   ALA M 148      51.858  62.455  67.898  0.00  0.00      MON1  
ATOM   2287  O   ALA M 148      51.430  62.330  66.751  0.00  0.00      MON1  
ATOM   2288  N   THR M 149      51.800  63.648  68.529  0.00  0.00      MON1  
ATOM   2289  HN  THR M 149      51.992  63.682  69.515  0.00  0.00      MON1  
ATOM   2290  CA  THR M 149      51.364  64.924  67.946  0.00  0.00      MON1  
ATOM   2291  HA  THR M 149      50.350  64.802  67.596  0.00  0.00      MON1  
ATOM   2292  CB  THR M 149      51.412  66.089  68.930  0.00  0.00      MON1  
ATOM   2293  HB  THR M 149      52.430  66.210  69.363  0.00  0.00      MON1  
ATOM   2294  OG1 THR M 149      50.493  65.853  69.976  0.00  0.00      MON1  
ATOM   2295  HG1 THR M 149      50.587  66.581  70.591  0.00  0.00      MON1  
ATOM   2296  CG2 THR M 149      50.993  67.412  68.277  0.00  0.00      MON1  
ATOM   2297 HG21 THR M 149      50.054  67.265  67.702  0.00  0.00      MON1  
ATOM   2298 HG22 THR M 149      51.775  67.787  67.580  0.00  0.00      MON1  
ATOM   2299 HG23 THR M 149      50.840  68.203  69.039  0.00  0.00      MON1  
ATOM   2300  C   THR M 149      52.198  65.343  66.752  0.00  0.00      MON1  
ATOM   2301  O   THR M 149      51.668  65.543  65.657  0.00  0.00      MON1  
ATOM   2302  N   ILE M 150      53.545  65.390  66.926  0.00  0.00      MON1  
ATOM   2303  HN  ILE M 150      53.934  65.221  67.835  0.00  0.00      MON1  
ATOM   2304  CA  ILE M 150      54.509  65.632  65.858  0.00  0.00      MON1  
ATOM   2305  HA  ILE M 150      54.237  66.561  65.377  0.00  0.00      MON1  
ATOM   2306  CB  ILE M 150      55.947  65.734  66.365  0.00  0.00      MON1  
ATOM   2307  HB  ILE M 150      56.225  64.772  66.858  0.00  0.00      MON1  
ATOM   2308  CG2 ILE M 150      56.916  65.993  65.183  0.00  0.00      MON1  
ATOM   2309 HG21 ILE M 150      56.603  66.894  64.616  0.00  0.00      MON1  
ATOM   2310 HG22 ILE M 150      56.961  65.132  64.486  0.00  0.00      MON1  
ATOM   2311 HG23 ILE M 150      57.947  66.167  65.557  0.00  0.00      MON1  
ATOM   2312  CG1 ILE M 150      56.085  66.838  67.435  0.00  0.00      MON1  
ATOM   2313 HG11 ILE M 150      55.224  66.813  68.136  0.00  0.00      MON1  
ATOM   2314 HG12 ILE M 150      56.080  67.837  66.948  0.00  0.00      MON1  
ATOM   2315  CD  ILE M 150      57.346  66.669  68.285  0.00  0.00      MON1  
ATOM   2316  HD1 ILE M 150      58.261  66.713  67.664  0.00  0.00      MON1  
ATOM   2317  HD2 ILE M 150      57.326  65.701  68.831  0.00  0.00      MON1  
ATOM   2318  HD3 ILE M 150      57.403  67.479  69.038  0.00  0.00      MON1  
ATOM   2319  C   ILE M 150      54.417  64.540  64.796  0.00  0.00      MON1  
ATOM   2320  O   ILE M 150      54.118  64.836  63.642  0.00  0.00      MON1  
ATOM   2321  N   VAL M 151      54.566  63.246  65.183  0.00  0.00      MON1  
ATOM   2322  HN  VAL M 151      54.732  63.043  66.152  0.00  0.00      MON1  
ATOM   2323  CA  VAL M 151      54.580  62.076  64.295  0.00  0.00      MON1  
ATOM   2324  HA  VAL M 151      55.431  62.176  63.641  0.00  0.00      MON1  
ATOM   2325  CB  VAL M 151      54.782  60.782  65.112  0.00  0.00      MON1  
ATOM   2326  HB  VAL M 151      54.245  60.907  66.078  0.00  0.00      MON1  
ATOM   2327  CG1 VAL M 151      54.197  59.522  64.448  0.00  0.00      MON1  
ATOM   2328 HG11 VAL M 151      54.443  59.508  63.367  0.00  0.00      MON1  
ATOM   2329 HG12 VAL M 151      53.093  59.483  64.546  0.00  0.00      MON1  
ATOM   2330 HG13 VAL M 151      54.614  58.612  64.925  0.00  0.00      MON1  
ATOM   2331  CG2 VAL M 151      56.285  60.573  65.400  0.00  0.00      MON1  
ATOM   2332 HG21 VAL M 151      56.709  61.449  65.934  0.00  0.00      MON1  
ATOM   2333 HG22 VAL M 151      56.843  60.424  64.451  0.00  0.00      MON1  
ATOM   2334 HG23 VAL M 151      56.438  59.673  66.033  0.00  0.00      MON1  
ATOM   2335  C   VAL M 151      53.368  61.952  63.373  0.00  0.00      MON1  
ATOM   2336  O   VAL M 151      53.513  61.825  62.153  0.00  0.00      MON1  
ATOM   2337  N   PHE M 152      52.130  62.033  63.903  0.00  0.00      MON1  
ATOM   2338  HN  PHE M 152      51.997  62.151  64.891  0.00  0.00      MON1  
ATOM   2339  CA  PHE M 152      50.926  62.003  63.086  0.00  0.00      MON1  
ATOM   2340  HA  PHE M 152      51.038  61.181  62.392  0.00  0.00      MON1  
ATOM   2341  CB  PHE M 152      49.646  61.744  63.927  0.00  0.00      MON1  
ATOM   2342  HB1 PHE M 152      48.742  62.039  63.354  0.00  0.00      MON1  
ATOM   2343  HB2 PHE M 152      49.673  62.340  64.863  0.00  0.00      MON1  
ATOM   2344  CG  PHE M 152      49.508  60.279  64.290  0.00  0.00      MON1  
ATOM   2345  CD1 PHE M 152      48.444  59.521  63.768  0.00  0.00      MON1  
ATOM   2346  HD1 PHE M 152      47.748  59.981  63.084  0.00  0.00      MON1  
ATOM   2347  CE1 PHE M 152      48.283  58.171  64.107  0.00  0.00      MON1  
ATOM   2348  HE1 PHE M 152      47.472  57.599  63.682  0.00  0.00      MON1  
ATOM   2349  CZ  PHE M 152      49.181  57.561  64.989  0.00  0.00      MON1  
ATOM   2350  HZ  PHE M 152      49.059  56.520  65.252  0.00  0.00      MON1  
ATOM   2351  CD2 PHE M 152      50.390  59.650  65.187  0.00  0.00      MON1  
ATOM   2352  HD2 PHE M 152      51.202  60.205  65.624  0.00  0.00      MON1  
ATOM   2353  CE2 PHE M 152      50.235  58.302  65.532  0.00  0.00      MON1  
ATOM   2354  HE2 PHE M 152      50.928  57.837  66.219  0.00  0.00      MON1  
ATOM   2355  C   PHE M 152      50.805  63.242  62.182  0.00  0.00      MON1  
ATOM   2356  O   PHE M 152      50.380  63.141  61.034  0.00  0.00      MON1  
ATOM   2357  N   GLY M 153      51.277  64.423  62.645  0.00  0.00      MON1  
ATOM   2358  HN  GLY M 153      51.613  64.485  63.587  0.00  0.00      MON1  
ATOM   2359  CA  GLY M 153      51.450  65.627  61.830  0.00  0.00      MON1  
ATOM   2360  HA1 GLY M 153      51.835  66.378  62.494  0.00  0.00      MON1  
ATOM   2361  HA2 GLY M 153      50.494  65.885  61.400  0.00  0.00      MON1  
ATOM   2362  C   GLY M 153      52.449  65.562  60.689  0.00  0.00      MON1  
ATOM   2363  O   GLY M 153      52.169  66.034  59.591  0.00  0.00      MON1  
ATOM   2364  N   ILE M 154      53.649  64.981  60.887  0.00  0.00      MON1  
ATOM   2365  HN  ILE M 154      53.907  64.698  61.816  0.00  0.00      MON1  
ATOM   2366  CA  ILE M 154      54.591  64.701  59.801  0.00  0.00      MON1  
ATOM   2367  HA  ILE M 154      54.611  65.594  59.190  0.00  0.00      MON1  
ATOM   2368  CB  ILE M 154      56.035  64.478  60.211  0.00  0.00      MON1  
ATOM   2369  HB  ILE M 154      56.376  65.405  60.731  0.00  0.00      MON1  
ATOM   2370  CG2 ILE M 154      56.176  63.308  61.201  0.00  0.00      MON1  
ATOM   2371 HG21 ILE M 154      55.863  62.347  60.743  0.00  0.00      MON1  
ATOM   2372 HG22 ILE M 154      55.557  63.503  62.096  0.00  0.00      MON1  
ATOM   2373 HG23 ILE M 154      57.228  63.200  61.541  0.00  0.00      MON1  
ATOM   2374  CG1 ILE M 154      56.901  64.283  58.947  0.00  0.00      MON1  
ATOM   2375 HG11 ILE M 154      56.703  65.126  58.245  0.00  0.00      MON1  
ATOM   2376 HG12 ILE M 154      56.627  63.341  58.422  0.00  0.00      MON1  
ATOM   2377  CD  ILE M 154      58.382  64.208  59.240  0.00  0.00      MON1  
ATOM   2378  HD1 ILE M 154      58.609  64.448  60.299  0.00  0.00      MON1  
ATOM   2379  HD2 ILE M 154      58.936  64.916  58.590  0.00  0.00      MON1  
ATOM   2380  HD3 ILE M 154      58.745  63.177  59.035  0.00  0.00      MON1  
ATOM   2381  C   ILE M 154      54.137  63.615  58.834  0.00  0.00      MON1  
ATOM   2382  O   ILE M 154      54.292  63.762  57.623  0.00  0.00      MON1  
ATOM   2383  N   THR M 155      53.514  62.514  59.304  0.00  0.00      MON1  
ATOM   2384  HN  THR M 155      53.420  62.375  60.292  0.00  0.00      MON1  
ATOM   2385  CA  THR M 155      52.918  61.542  58.396  0.00  0.00      MON1  
ATOM   2386  HA  THR M 155      53.687  61.181  57.728  0.00  0.00      MON1  
ATOM   2387  CB  THR M 155      52.271  60.370  59.093  0.00  0.00      MON1  
ATOM   2388  HB  THR M 155      51.453  60.711  59.772  0.00  0.00      MON1  
ATOM   2389  OG1 THR M 155      53.246  59.689  59.871  0.00  0.00      MON1  
ATOM   2390  HG1 THR M 155      53.410  60.241  60.651  0.00  0.00      MON1  
ATOM   2391  CG2 THR M 155      51.713  59.384  58.057  0.00  0.00      MON1  
ATOM   2392 HG21 THR M 155      52.537  59.050  57.395  0.00  0.00      MON1  
ATOM   2393 HG22 THR M 155      50.892  59.813  57.450  0.00  0.00      MON1  
ATOM   2394 HG23 THR M 155      51.308  58.489  58.577  0.00  0.00      MON1  
ATOM   2395  C   THR M 155      51.867  62.213  57.559  0.00  0.00      MON1  
ATOM   2396  O   THR M 155      51.785  61.985  56.359  0.00  0.00      MON1  
ATOM   2397  N   ALA M 156      51.061  63.112  58.176  0.00  0.00      MON1  
ATOM   2398  HN  ALA M 156      51.090  63.244  59.168  0.00  0.00      MON1  
ATOM   2399  CA  ALA M 156      50.153  63.970  57.453  0.00  0.00      MON1  
ATOM   2400  HA  ALA M 156      49.468  63.325  56.919  0.00  0.00      MON1  
ATOM   2401  CB  ALA M 156      49.347  64.874  58.403  0.00  0.00      MON1  
ATOM   2402  HB1 ALA M 156      49.977  65.649  58.878  0.00  0.00      MON1  
ATOM   2403  HB2 ALA M 156      48.914  64.263  59.218  0.00  0.00      MON1  
ATOM   2404  HB3 ALA M 156      48.518  65.380  57.869  0.00  0.00      MON1  
ATOM   2405  C   ALA M 156      50.887  64.791  56.403  0.00  0.00      MON1  
ATOM   2406  O   ALA M 156      50.559  64.651  55.236  0.00  0.00      MON1  
ATOM   2407  N   ALA M 157      51.978  65.524  56.734  0.00  0.00      MON1  
ATOM   2408  HN  ALA M 157      52.252  65.605  57.696  0.00  0.00      MON1  
ATOM   2409  CA  ALA M 157      52.805  66.206  55.744  0.00  0.00      MON1  
ATOM   2410  HA  ALA M 157      52.220  67.030  55.361  0.00  0.00      MON1  
ATOM   2411  CB  ALA M 157      54.105  66.757  56.382  0.00  0.00      MON1  
ATOM   2412  HB1 ALA M 157      54.796  65.939  56.670  0.00  0.00      MON1  
ATOM   2413  HB2 ALA M 157      53.881  67.340  57.294  0.00  0.00      MON1  
ATOM   2414  HB3 ALA M 157      54.633  67.427  55.671  0.00  0.00      MON1  
ATOM   2415  C   ALA M 157      53.169  65.326  54.544  0.00  0.00      MON1  
ATOM   2416  O   ALA M 157      52.993  65.736  53.397  0.00  0.00      MON1  
ATOM   2417  N   MET M 158      53.638  64.091  54.798  0.00  0.00      MON1  
ATOM   2418  HN  MET M 158      53.740  63.793  55.752  0.00  0.00      MON1  
ATOM   2419  CA  MET M 158      54.025  63.154  53.776  0.00  0.00      MON1  
ATOM   2420  HA  MET M 158      54.708  63.639  53.102  0.00  0.00      MON1  
ATOM   2421  CB  MET M 158      54.696  61.941  54.395  0.00  0.00      MON1  
ATOM   2422  HB1 MET M 158      54.943  61.235  53.564  0.00  0.00      MON1  
ATOM   2423  HB2 MET M 158      53.995  61.542  55.164  0.00  0.00      MON1  
ATOM   2424  CG  MET M 158      56.017  62.168  55.085  0.00  0.00      MON1  
ATOM   2425  HG1 MET M 158      55.904  62.933  55.884  0.00  0.00      MON1  
ATOM   2426  HG2 MET M 158      56.736  62.577  54.341  0.00  0.00      MON1  
ATOM   2427  SD  MET M 158      56.670  60.675  55.795  0.00  0.00      MON1  
ATOM   2428  CE  MET M 158      58.197  61.498  56.271  0.00  0.00      MON1  
ATOM   2429  HE1 MET M 158      57.989  62.168  57.126  0.00  0.00      MON1  
ATOM   2430  HE2 MET M 158      58.600  62.138  55.461  0.00  0.00      MON1  
ATOM   2431  HE3 MET M 158      58.988  60.806  56.598  0.00  0.00      MON1  
ATOM   2432  C   MET M 158      52.883  62.669  52.927  0.00  0.00      MON1  
ATOM   2433  O   MET M 158      53.020  62.464  51.725  0.00  0.00      MON1  
ATOM   2434  N   LEU M 159      51.723  62.445  53.553  0.00  0.00      MON1  
ATOM   2435  HN  LEU M 159      51.634  62.629  54.535  0.00  0.00      MON1  
ATOM   2436  CA  LEU M 159      50.568  61.928  52.876  0.00  0.00      MON1  
ATOM   2437  HA  LEU M 159      50.925  61.136  52.240  0.00  0.00      MON1  
ATOM   2438  CB  LEU M 159      49.455  61.452  53.857  0.00  0.00      MON1  
ATOM   2439  HB1 LEU M 159      48.448  61.369  53.396  0.00  0.00      MON1  
ATOM   2440  HB2 LEU M 159      49.372  62.231  54.652  0.00  0.00      MON1  
ATOM   2441  CG  LEU M 159      49.796  60.145  54.504  0.00  0.00      MON1  
ATOM   2442  HG  LEU M 159      50.761  60.390  54.948  0.00  0.00      MON1  
ATOM   2443  CD1 LEU M 159      48.847  59.478  55.472  0.00  0.00      MON1  
ATOM   2444 HD11 LEU M 159      47.838  59.349  55.076  0.00  0.00      MON1  
ATOM   2445 HD12 LEU M 159      48.759  60.130  56.369  0.00  0.00      MON1  
ATOM   2446 HD13 LEU M 159      49.235  58.493  55.813  0.00  0.00      MON1  
ATOM   2447  CD2 LEU M 159      49.633  59.225  53.406  0.00  0.00      MON1  
ATOM   2448 HD21 LEU M 159      50.059  59.434  52.412  0.00  0.00      MON1  
ATOM   2449 HD22 LEU M 159      48.566  59.313  53.087  0.00  0.00      MON1  
ATOM   2450 HD23 LEU M 159      49.590  58.156  53.701  0.00  0.00      MON1  
ATOM   2451  C   LEU M 159      49.939  62.901  51.938  0.00  0.00      MON1  
ATOM   2452  O   LEU M 159      50.226  64.096  51.899  0.00  0.00      MON1  
ATOM   2453  N   VAL M 160      49.017  62.366  51.131  0.00  0.00      MON1  
ATOM   2454  HN  VAL M 160      48.775  61.402  51.204  0.00  0.00      MON1  
ATOM   2455  CA  VAL M 160      48.218  63.138  50.221  0.00  0.00      MON1  
ATOM   2456  HA  VAL M 160      48.247  64.182  50.496  0.00  0.00      MON1  
ATOM   2457  CB  VAL M 160      48.627  62.972  48.768  0.00  0.00      MON1  
ATOM   2458  HB  VAL M 160      48.439  61.968  48.393  0.00  0.00      MON1  
ATOM   2459  CG1 VAL M 160      47.801  63.832  47.798  0.00  0.00      MON1  
ATOM   2460 HG11 VAL M 160      47.732  64.883  48.147  0.00  0.00      MON1  
ATOM   2461 HG12 VAL M 160      46.788  63.425  47.613  0.00  0.00      MON1  
ATOM   2462 HG13 VAL M 160      48.308  63.851  46.806  0.00  0.00      MON1  
ATOM   2463  CG2 VAL M 160      50.118  63.287  48.665  0.00  0.00      MON1  
ATOM   2464 HG21 VAL M 160      50.749  62.502  49.133  0.00  0.00      MON1  
ATOM   2465 HG22 VAL M 160      50.332  64.246  49.172  0.00  0.00      MON1  
ATOM   2466 HG23 VAL M 160      50.409  63.376  47.599  0.00  0.00      MON1  
ATOM   2467  C   VAL M 160      46.821  62.649  50.419  0.00  0.00      MON1  
ATOM   2468  O   VAL M 160      46.602  61.605  51.029  0.00  0.00      MON1  
ATOM   2469  N   SER M 161      45.839  63.409  49.912  0.00  0.00      MON1  
ATOM   2470  HN  SER M 161      46.077  64.253  49.444  0.00  0.00      MON1  
ATOM   2471  CA  SER M 161      44.446  63.042  49.873  0.00  0.00      MON1  
ATOM   2472  HA  SER M 161      43.933  63.858  49.385  0.00  0.00      MON1  
ATOM   2473  CB  SER M 161      44.164  61.760  49.032  0.00  0.00      MON1  
ATOM   2474  HB1 SER M 161      44.693  61.887  48.065  0.00  0.00      MON1  
ATOM   2475  HB2 SER M 161      43.080  61.661  48.799  0.00  0.00      MON1  
ATOM   2476  OG  SER M 161      44.619  60.555  49.621  0.00  0.00      MON1  
ATOM   2477  HG1 SER M 161      45.480  60.747  50.037  0.00  0.00      MON1  
ATOM   2478  C   SER M 161      43.857  62.955  51.244  0.00  0.00      MON1  
ATOM   2479  O   SER M 161      44.279  63.648  52.171  0.00  0.00      MON1  
ATOM   2480  N   TRP M 162      42.838  62.094  51.367  0.00  0.00      MON1  
ATOM   2481  HN  TRP M 162      42.589  61.526  50.586  0.00  0.00      MON1  
ATOM   2482  CA  TRP M 162      42.106  61.806  52.568  0.00  0.00      MON1  
ATOM   2483  HA  TRP M 162      41.658  62.730  52.909  0.00  0.00      MON1  
ATOM   2484  CB  TRP M 162      40.978  60.774  52.316  0.00  0.00      MON1  
ATOM   2485  HB1 TRP M 162      41.266  59.955  51.633  0.00  0.00      MON1  
ATOM   2486  HB2 TRP M 162      40.178  61.320  51.763  0.00  0.00      MON1  
ATOM   2487  CG  TRP M 162      40.371  60.188  53.552  0.00  0.00      MON1  
ATOM   2488  CD1 TRP M 162      39.398  60.769  54.311  0.00  0.00      MON1  
ATOM   2489  HD1 TRP M 162      38.931  61.719  54.080  0.00  0.00      MON1  
ATOM   2490  NE1 TRP M 162      39.099  59.951  55.375  0.00  0.00      MON1  
ATOM   2491  HE1 TRP M 162      38.433  60.101  56.072  0.00  0.00      MON1  
ATOM   2492  CE2 TRP M 162      39.891  58.846  55.333  0.00  0.00      MON1  
ATOM   2493  CD2 TRP M 162      40.732  58.971  54.209  0.00  0.00      MON1  
ATOM   2494  CE3 TRP M 162      41.626  57.965  53.913  0.00  0.00      MON1  
ATOM   2495  HE3 TRP M 162      42.114  57.918  52.962  0.00  0.00      MON1  
ATOM   2496  CZ3 TRP M 162      41.791  56.943  54.820  0.00  0.00      MON1  
ATOM   2497  HZ3 TRP M 162      42.627  56.269  54.700  0.00  0.00      MON1  
ATOM   2498  CZ2 TRP M 162      39.945  57.745  56.165  0.00  0.00      MON1  
ATOM   2499  HZ2 TRP M 162      39.303  57.653  57.027  0.00  0.00      MON1  
ATOM   2500  CH2 TRP M 162      40.952  56.827  55.929  0.00  0.00      MON1  
ATOM   2501  HH2 TRP M 162      41.121  56.050  56.665  0.00  0.00      MON1  
ATOM   2502  C   TRP M 162      42.976  61.339  53.695  0.00  0.00      MON1  
ATOM   2503  O   TRP M 162      42.790  61.794  54.824  0.00  0.00      MON1  
ATOM   2504  N   PRO M 163      43.948  60.474  53.463  0.00  0.00      MON1  
ATOM   2505  CD  PRO M 163      44.024  59.528  52.362  0.00  0.00      MON1  
ATOM   2506  HD1 PRO M 163      44.784  60.020  51.743  0.00  0.00      MON1  
ATOM   2507  HD2 PRO M 163      43.120  59.325  51.771  0.00  0.00      MON1  
ATOM   2508  CA  PRO M 163      44.784  60.023  54.525  0.00  0.00      MON1  
ATOM   2509  HA  PRO M 163      44.126  59.584  55.248  0.00  0.00      MON1  
ATOM   2510  CB  PRO M 163      45.666  58.947  53.903  0.00  0.00      MON1  
ATOM   2511  HB1 PRO M 163      46.029  58.211  54.651  0.00  0.00      MON1  
ATOM   2512  HB2 PRO M 163      46.527  59.419  53.380  0.00  0.00      MON1  
ATOM   2513  CG  PRO M 163      44.788  58.311  52.843  0.00  0.00      MON1  
ATOM   2514  HG1 PRO M 163      45.375  57.831  52.031  0.00  0.00      MON1  
ATOM   2515  HG2 PRO M 163      44.142  57.544  53.310  0.00  0.00      MON1  
ATOM   2516  C   PRO M 163      45.567  61.150  55.152  0.00  0.00      MON1  
ATOM   2517  O   PRO M 163      45.885  61.092  56.333  0.00  0.00      MON1  
ATOM   2518  N   LYS M 164      45.909  62.217  54.412  0.00  0.00      MON1  
ATOM   2519  HN  LYS M 164      45.662  62.292  53.447  0.00  0.00      MON1  
ATOM   2520  CA  LYS M 164      46.577  63.321  55.057  0.00  0.00      MON1  
ATOM   2521  HA  LYS M 164      47.451  62.941  55.570  0.00  0.00      MON1  
ATOM   2522  CB  LYS M 164      47.029  64.406  54.074  0.00  0.00      MON1  
ATOM   2523  HB1 LYS M 164      46.171  64.757  53.462  0.00  0.00      MON1  
ATOM   2524  HB2 LYS M 164      47.768  63.934  53.389  0.00  0.00      MON1  
ATOM   2525  CG  LYS M 164      47.698  65.584  54.794  0.00  0.00      MON1  
ATOM   2526  HG1 LYS M 164      48.290  65.207  55.650  0.00  0.00      MON1  
ATOM   2527  HG2 LYS M 164      46.911  66.245  55.225  0.00  0.00      MON1  
ATOM   2528  CD  LYS M 164      48.589  66.416  53.871  0.00  0.00      MON1  
ATOM   2529  HD1 LYS M 164      49.475  65.813  53.573  0.00  0.00      MON1  
ATOM   2530  HD2 LYS M 164      48.958  67.286  54.459  0.00  0.00      MON1  
ATOM   2531  CE  LYS M 164      47.881  66.842  52.590  0.00  0.00      MON1  
ATOM   2532  HE1 LYS M 164      46.953  67.407  52.828  0.00  0.00      MON1  
ATOM   2533  HE2 LYS M 164      47.631  65.968  51.951  0.00  0.00      MON1  
ATOM   2534  NZ  LYS M 164      48.780  67.726  51.832  0.00  0.00      MON1  
ATOM   2535  HZ1 LYS M 164      49.656  67.202  51.625  0.00  0.00      MON1  
ATOM   2536  HZ2 LYS M 164      49.030  68.526  52.475  0.00  0.00      MON1  
ATOM   2537  HZ3 LYS M 164      48.350  68.097  50.967  0.00  0.00      MON1  
ATOM   2538  C   LYS M 164      45.713  63.959  56.108  0.00  0.00      MON1  
ATOM   2539  O   LYS M 164      46.161  64.268  57.209  0.00  0.00      MON1  
ATOM   2540  N   ILE M 165      44.424  64.140  55.780  0.00  0.00      MON1  
ATOM   2541  HN  ILE M 165      44.076  63.810  54.905  0.00  0.00      MON1  
ATOM   2542  CA  ILE M 165      43.466  64.728  56.682  0.00  0.00      MON1  
ATOM   2543  HA  ILE M 165      43.856  65.681  57.012  0.00  0.00      MON1  
ATOM   2544  CB  ILE M 165      42.118  64.959  56.030  0.00  0.00      MON1  
ATOM   2545  HB  ILE M 165      41.709  63.996  55.643  0.00  0.00      MON1  
ATOM   2546  CG2 ILE M 165      41.142  65.507  57.097  0.00  0.00      MON1  
ATOM   2547 HG21 ILE M 165      41.571  66.395  57.607  0.00  0.00      MON1  
ATOM   2548 HG22 ILE M 165      40.891  64.741  57.859  0.00  0.00      MON1  
ATOM   2549 HG23 ILE M 165      40.178  65.806  56.640  0.00  0.00      MON1  
ATOM   2550  CG1 ILE M 165      42.276  65.915  54.825  0.00  0.00      MON1  
ATOM   2551 HG11 ILE M 165      43.005  65.491  54.098  0.00  0.00      MON1  
ATOM   2552 HG12 ILE M 165      42.688  66.881  55.192  0.00  0.00      MON1  
ATOM   2553  CD  ILE M 165      40.966  66.178  54.072  0.00  0.00      MON1  
ATOM   2554  HD1 ILE M 165      40.198  66.650  54.715  0.00  0.00      MON1  
ATOM   2555  HD2 ILE M 165      40.547  65.224  53.684  0.00  0.00      MON1  
ATOM   2556  HD3 ILE M 165      41.145  66.850  53.206  0.00  0.00      MON1  
ATOM   2557  C   ILE M 165      43.277  63.895  57.912  0.00  0.00      MON1  
ATOM   2558  O   ILE M 165      43.235  64.418  59.023  0.00  0.00      MON1  
ATOM   2559  N   ILE M 166      43.174  62.563  57.754  0.00  0.00      MON1  
ATOM   2560  HN  ILE M 166      43.178  62.143  56.845  0.00  0.00      MON1  
ATOM   2561  CA  ILE M 166      42.995  61.700  58.903  0.00  0.00      MON1  
ATOM   2562  HA  ILE M 166      42.133  62.061  59.446  0.00  0.00      MON1  
ATOM   2563  CB  ILE M 166      42.749  60.242  58.573  0.00  0.00      MON1  
ATOM   2564  HB  ILE M 166      42.515  59.693  59.519  0.00  0.00      MON1  
ATOM   2565  CG2 ILE M 166      41.510  60.187  57.675  0.00  0.00      MON1  
ATOM   2566 HG21 ILE M 166      41.752  60.431  56.621  0.00  0.00      MON1  
ATOM   2567 HG22 ILE M 166      40.717  60.876  58.033  0.00  0.00      MON1  
ATOM   2568 HG23 ILE M 166      41.114  59.158  57.733  0.00  0.00      MON1  
ATOM   2569  CG1 ILE M 166      43.969  59.580  57.924  0.00  0.00      MON1  
ATOM   2570 HG11 ILE M 166      44.879  59.636  58.551  0.00  0.00      MON1  
ATOM   2571 HG12 ILE M 166      44.055  60.197  57.038  0.00  0.00      MON1  
ATOM   2572  CD  ILE M 166      43.826  58.125  57.508  0.00  0.00      MON1  
ATOM   2573  HD1 ILE M 166      43.030  58.033  56.750  0.00  0.00      MON1  
ATOM   2574  HD2 ILE M 166      43.566  57.487  58.380  0.00  0.00      MON1  
ATOM   2575  HD3 ILE M 166      44.772  57.748  57.064  0.00  0.00      MON1  
ATOM   2576  C   ILE M 166      44.168  61.812  59.851  0.00  0.00      MON1  
ATOM   2577  O   ILE M 166      43.973  61.899  61.054  0.00  0.00      MON1  
ATOM   2578  N   PHE M 167      45.416  61.878  59.339  0.00  0.00      MON1  
ATOM   2579  HN  PHE M 167      45.539  61.807  58.347  0.00  0.00      MON1  
ATOM   2580  CA  PHE M 167      46.629  61.985  60.127  0.00  0.00      MON1  
ATOM   2581  HA  PHE M 167      46.527  61.294  60.954  0.00  0.00      MON1  
ATOM   2582  CB  PHE M 167      47.865  61.562  59.286  0.00  0.00      MON1  
ATOM   2583  HB1 PHE M 167      48.783  62.083  59.614  0.00  0.00      MON1  
ATOM   2584  HB2 PHE M 167      47.710  61.794  58.211  0.00  0.00      MON1  
ATOM   2585  CG  PHE M 167      48.119  60.084  59.450  0.00  0.00      MON1  
ATOM   2586  CD1 PHE M 167      48.964  59.646  60.480  0.00  0.00      MON1  
ATOM   2587  HD1 PHE M 167      49.405  60.374  61.144  0.00  0.00      MON1  
ATOM   2588  CE1 PHE M 167      49.248  58.286  60.655  0.00  0.00      MON1  
ATOM   2589  HE1 PHE M 167      49.906  57.969  61.452  0.00  0.00      MON1  
ATOM   2590  CZ  PHE M 167      48.682  57.342  59.791  0.00  0.00      MON1  
ATOM   2591  HZ  PHE M 167      48.903  56.292  59.921  0.00  0.00      MON1  
ATOM   2592  CD2 PHE M 167      47.569  59.125  58.585  0.00  0.00      MON1  
ATOM   2593  HD2 PHE M 167      46.937  59.440  57.772  0.00  0.00      MON1  
ATOM   2594  CE2 PHE M 167      47.842  57.761  58.753  0.00  0.00      MON1  
ATOM   2595  HE2 PHE M 167      47.412  57.036  58.078  0.00  0.00      MON1  
ATOM   2596  C   PHE M 167      46.802  63.345  60.815  0.00  0.00      MON1  
ATOM   2597  O   PHE M 167      47.184  63.408  61.983  0.00  0.00      MON1  
ATOM   2598  N   TYR M 168      46.444  64.464  60.138  0.00  0.00      MON1  
ATOM   2599  HN  TYR M 168      46.173  64.387  59.176  0.00  0.00      MON1  
ATOM   2600  CA  TYR M 168      46.358  65.791  60.745  0.00  0.00      MON1  
ATOM   2601  HA  TYR M 168      47.320  66.002  61.192  0.00  0.00      MON1  
ATOM   2602  CB  TYR M 168      46.078  66.858  59.644  0.00  0.00      MON1  
ATOM   2603  HB1 TYR M 168      45.157  66.580  59.087  0.00  0.00      MON1  
ATOM   2604  HB2 TYR M 168      46.924  66.873  58.924  0.00  0.00      MON1  
ATOM   2605  CG  TYR M 168      45.910  68.252  60.205  0.00  0.00      MON1  
ATOM   2606  CD1 TYR M 168      47.028  68.955  60.682  0.00  0.00      MON1  
ATOM   2607  HD1 TYR M 168      48.005  68.495  60.646  0.00  0.00      MON1  
ATOM   2608  CE1 TYR M 168      46.894  70.252  61.199  0.00  0.00      MON1  
ATOM   2609  HE1 TYR M 168      47.766  70.779  61.558  0.00  0.00      MON1  
ATOM   2610  CZ  TYR M 168      45.633  70.849  61.257  0.00  0.00      MON1  
ATOM   2611  OH  TYR M 168      45.486  72.154  61.761  0.00  0.00      MON1  
ATOM   2612  HH  TYR M 168      46.345  72.602  61.692  0.00  0.00      MON1  
ATOM   2613  CD2 TYR M 168      44.646  68.866  60.267  0.00  0.00      MON1  
ATOM   2614  HD2 TYR M 168      43.774  68.331  59.922  0.00  0.00      MON1  
ATOM   2615  CE2 TYR M 168      44.507  70.156  60.801  0.00  0.00      MON1  
ATOM   2616  HE2 TYR M 168      43.536  70.623  60.857  0.00  0.00      MON1  
ATOM   2617  C   TYR M 168      45.338  65.867  61.886  0.00  0.00      MON1  
ATOM   2618  O   TYR M 168      45.638  66.371  62.966  0.00  0.00      MON1  
ATOM   2619  N   LEU M 169      44.120  65.317  61.688  0.00  0.00      MON1  
ATOM   2620  HN  LEU M 169      43.880  64.926  60.795  0.00  0.00      MON1  
ATOM   2621  CA  LEU M 169      43.108  65.209  62.722  0.00  0.00      MON1  
ATOM   2622  HA  LEU M 169      43.045  66.191  63.159  0.00  0.00      MON1  
ATOM   2623  CB  LEU M 169      41.762  64.735  62.106  0.00  0.00      MON1  
ATOM   2624  HB1 LEU M 169      41.035  64.494  62.915  0.00  0.00      MON1  
ATOM   2625  HB2 LEU M 169      41.959  63.797  61.539  0.00  0.00      MON1  
ATOM   2626  CG  LEU M 169      41.097  65.758  61.176  0.00  0.00      MON1  
ATOM   2627  HG  LEU M 169      41.806  66.032  60.363  0.00  0.00      MON1  
ATOM   2628  CD1 LEU M 169      39.857  65.082  60.553  0.00  0.00      MON1  
ATOM   2629 HD11 LEU M 169      38.980  65.151  61.228  0.00  0.00      MON1  
ATOM   2630 HD12 LEU M 169      40.070  64.000  60.413  0.00  0.00      MON1  
ATOM   2631 HD13 LEU M 169      39.622  65.449  59.541  0.00  0.00      MON1  
ATOM   2632  CD2 LEU M 169      40.848  66.961  62.079  0.00  0.00      MON1  
ATOM   2633 HD21 LEU M 169      41.247  66.768  63.094  0.00  0.00      MON1  
ATOM   2634 HD22 LEU M 169      39.807  67.080  62.417  0.00  0.00      MON1  
ATOM   2635 HD23 LEU M 169      41.407  67.868  61.803  0.00  0.00      MON1  
ATOM   2636  C   LEU M 169      43.486  64.331  63.909  0.00  0.00      MON1  
ATOM   2637  O   LEU M 169      43.305  64.730  65.058  0.00  0.00      MON1  
ATOM   2638  N   LEU M 170      44.085  63.144  63.665  0.00  0.00      MON1  
ATOM   2639  HN  LEU M 170      44.164  62.804  62.723  0.00  0.00      MON1  
ATOM   2640  CA  LEU M 170      44.669  62.301  64.701  0.00  0.00      MON1  
ATOM   2641  HA  LEU M 170      43.892  62.073  65.417  0.00  0.00      MON1  
ATOM   2642  CB  LEU M 170      45.181  60.973  64.074  0.00  0.00      MON1  
ATOM   2643  HB1 LEU M 170      45.820  60.424  64.799  0.00  0.00      MON1  
ATOM   2644  HB2 LEU M 170      45.808  61.231  63.192  0.00  0.00      MON1  
ATOM   2645  CG  LEU M 170      44.065  59.996  63.623  0.00  0.00      MON1  
ATOM   2646  HG  LEU M 170      43.285  60.573  63.072  0.00  0.00      MON1  
ATOM   2647  CD1 LEU M 170      44.617  58.926  62.668  0.00  0.00      MON1  
ATOM   2648 HD11 LEU M 170      45.386  58.312  63.180  0.00  0.00      MON1  
ATOM   2649 HD12 LEU M 170      45.077  59.401  61.776  0.00  0.00      MON1  
ATOM   2650 HD13 LEU M 170      43.800  58.256  62.325  0.00  0.00      MON1  
ATOM   2651  CD2 LEU M 170      43.392  59.308  64.821  0.00  0.00      MON1  
ATOM   2652 HD21 LEU M 170      42.937  60.056  65.503  0.00  0.00      MON1  
ATOM   2653 HD22 LEU M 170      44.137  58.718  65.396  0.00  0.00      MON1  
ATOM   2654 HD23 LEU M 170      42.592  58.620  64.473  0.00  0.00      MON1  
ATOM   2655  C   LEU M 170      45.775  63.017  65.490  0.00  0.00      MON1  
ATOM   2656  O   LEU M 170      45.680  63.139  66.711  0.00  0.00      MON1  
ATOM   2657  N   GLY M 171      46.764  63.641  64.803  0.00  0.00      MON1  
ATOM   2658  HN  GLY M 171      46.798  63.549  63.801  0.00  0.00      MON1  
ATOM   2659  CA  GLY M 171      47.772  64.528  65.399  0.00  0.00      MON1  
ATOM   2660  HA1 GLY M 171      48.319  64.993  64.591  0.00  0.00      MON1  
ATOM   2661  HA2 GLY M 171      48.404  63.938  66.046  0.00  0.00      MON1  
ATOM   2662  C   GLY M 171      47.195  65.645  66.247  0.00  0.00      MON1  
ATOM   2663  O   GLY M 171      47.690  65.930  67.332  0.00  0.00      MON1  
ATOM   2664  N   PHE M 172      46.098  66.282  65.794  0.00  0.00      MON1  
ATOM   2665  HN  PHE M 172      45.766  66.088  64.866  0.00  0.00      MON1  
ATOM   2666  CA  PHE M 172      45.333  67.267  66.543  0.00  0.00      MON1  
ATOM   2667  HA  PHE M 172      46.058  67.981  66.906  0.00  0.00      MON1  
ATOM   2668  CB  PHE M 172      44.351  67.996  65.589  0.00  0.00      MON1  
ATOM   2669  HB1 PHE M 172      43.464  67.369  65.360  0.00  0.00      MON1  
ATOM   2670  HB2 PHE M 172      44.869  68.221  64.630  0.00  0.00      MON1  
ATOM   2671  CG  PHE M 172      43.915  69.309  66.183  0.00  0.00      MON1  
ATOM   2672  CD1 PHE M 172      44.774  70.419  66.108  0.00  0.00      MON1  
ATOM   2673  HD1 PHE M 172      45.736  70.318  65.625  0.00  0.00      MON1  
ATOM   2674  CE1 PHE M 172      44.401  71.650  66.661  0.00  0.00      MON1  
ATOM   2675  HE1 PHE M 172      45.075  72.493  66.606  0.00  0.00      MON1  
ATOM   2676  CZ  PHE M 172      43.156  71.783  67.288  0.00  0.00      MON1  
ATOM   2677  HZ  PHE M 172      42.868  72.732  67.717  0.00  0.00      MON1  
ATOM   2678  CD2 PHE M 172      42.664  69.457  66.803  0.00  0.00      MON1  
ATOM   2679  HD2 PHE M 172      41.999  68.609  66.867  0.00  0.00      MON1  
ATOM   2680  CE2 PHE M 172      42.286  70.687  67.358  0.00  0.00      MON1  
ATOM   2681  HE2 PHE M 172      41.326  70.789  67.843  0.00  0.00      MON1  
ATOM   2682  C   PHE M 172      44.614  66.705  67.801  0.00  0.00      MON1  
ATOM   2683  O   PHE M 172      44.513  67.385  68.824  0.00  0.00      MON1  
ATOM   2684  N   THR M 173      44.098  65.452  67.788  0.00  0.00      MON1  
ATOM   2685  HN  THR M 173      44.075  64.949  66.920  0.00  0.00      MON1  
ATOM   2686  CA  THR M 173      43.605  64.759  68.997  0.00  0.00      MON1  
ATOM   2687  HA  THR M 173      42.923  65.448  69.474  0.00  0.00      MON1  
ATOM   2688  CB  THR M 173      42.788  63.476  68.766  0.00  0.00      MON1  
ATOM   2689  HB  THR M 173      42.402  63.121  69.754  0.00  0.00      MON1  
ATOM   2690  OG1 THR M 173      43.530  62.407  68.201  0.00  0.00      MON1  
ATOM   2691  HG1 THR M 173      44.237  62.784  67.651  0.00  0.00      MON1  
ATOM   2692  CG2 THR M 173      41.564  63.715  67.870  0.00  0.00      MON1  
ATOM   2693 HG21 THR M 173      41.873  63.872  66.817  0.00  0.00      MON1  
ATOM   2694 HG22 THR M 173      41.014  64.616  68.202  0.00  0.00      MON1  
ATOM   2695 HG23 THR M 173      40.887  62.836  67.901  0.00  0.00      MON1  
ATOM   2696  C   THR M 173      44.685  64.480  70.048  0.00  0.00      MON1  
ATOM   2697  O   THR M 173      44.475  64.714  71.238  0.00  0.00      MON1  
ATOM   2698  N   MET M 174      45.891  64.025  69.638  0.00  0.00      MON1  
ATOM   2699  HN  MET M 174      46.027  63.752  68.684  0.00  0.00      MON1  
ATOM   2700  CA  MET M 174      47.070  63.967  70.493  0.00  0.00      MON1  
ATOM   2701  HA  MET M 174      46.773  63.445  71.392  0.00  0.00      MON1  
ATOM   2702  CB  MET M 174      48.218  63.136  69.865  0.00  0.00      MON1  
ATOM   2703  HB1 MET M 174      49.157  63.334  70.434  0.00  0.00      MON1  
ATOM   2704  HB2 MET M 174      48.398  63.465  68.820  0.00  0.00      MON1  
ATOM   2705  CG  MET M 174      47.971  61.613  69.940  0.00  0.00      MON1  
ATOM   2706  HG1 MET M 174      47.611  61.377  70.966  0.00  0.00      MON1  
ATOM   2707  HG2 MET M 174      48.941  61.095  69.828  0.00  0.00      MON1  
ATOM   2708  SD  MET M 174      46.820  60.910  68.723  0.00  0.00      MON1  
ATOM   2709  CE  MET M 174      47.930  60.867  67.290  0.00  0.00      MON1  
ATOM   2710  HE1 MET M 174      48.802  60.209  67.486  0.00  0.00      MON1  
ATOM   2711  HE2 MET M 174      48.315  61.879  67.047  0.00  0.00      MON1  
ATOM   2712  HE3 MET M 174      47.407  60.473  66.395  0.00  0.00      MON1  
ATOM   2713  C   MET M 174      47.542  65.334  70.990  0.00  0.00      MON1  
ATOM   2714  O   MET M 174      47.860  65.501  72.164  0.00  0.00      MON1  
ATOM   2715  N   CYS M 175      47.515  66.372  70.128  0.00  0.00      MON1  
ATOM   2716  HN  CYS M 175      47.363  66.185  69.153  0.00  0.00      MON1  
ATOM   2717  CA  CYS M 175      47.795  67.754  70.488  0.00  0.00      MON1  
ATOM   2718  HA  CYS M 175      48.806  67.804  70.862  0.00  0.00      MON1  
ATOM   2719  CB  CYS M 175      47.656  68.673  69.251  0.00  0.00      MON1  
ATOM   2720  HB1 CYS M 175      46.608  68.640  68.891  0.00  0.00      MON1  
ATOM   2721  HB2 CYS M 175      48.270  68.226  68.445  0.00  0.00      MON1  
ATOM   2722  SG  CYS M 175      48.111  70.421  69.533  0.00  0.00      MON1  
ATOM   2723  HG1 CYS M 175      49.423  70.233  69.587  0.00  0.00      MON1  
ATOM   2724  C   CYS M 175      46.882  68.301  71.575  0.00  0.00      MON1  
ATOM   2725  O   CYS M 175      47.339  68.885  72.556  0.00  0.00      MON1  
ATOM   2726  N   CYS M 176      45.570  68.033  71.462  0.00  0.00      MON1  
ATOM   2727  HN  CYS M 176      45.224  67.616  70.617  0.00  0.00      MON1  
ATOM   2728  CA  CYS M 176      44.593  68.300  72.497  0.00  0.00      MON1  
ATOM   2729  HA  CYS M 176      44.575  69.368  72.664  0.00  0.00      MON1  
ATOM   2730  CB  CYS M 176      43.200  67.837  71.993  0.00  0.00      MON1  
ATOM   2731  HB1 CYS M 176      43.220  66.744  71.802  0.00  0.00      MON1  
ATOM   2732  HB2 CYS M 176      43.018  68.330  71.011  0.00  0.00      MON1  
ATOM   2733  SG  CYS M 176      41.845  68.243  73.139  0.00  0.00      MON1  
ATOM   2734  HG1 CYS M 176      42.274  67.477  74.134  0.00  0.00      MON1  
ATOM   2735  C   CYS M 176      44.973  67.645  73.834  0.00  0.00      MON1  
ATOM   2736  O   CYS M 176      44.834  68.257  74.893  0.00  0.00      MON1  
ATOM   2737  N   TYR M 177      45.499  66.400  73.818  0.00  0.00      MON1  
ATOM   2738  HN  TYR M 177      45.603  65.907  72.954  0.00  0.00      MON1  
ATOM   2739  CA  TYR M 177      45.959  65.731  75.014  0.00  0.00      MON1  
ATOM   2740  HA  TYR M 177      45.165  65.780  75.748  0.00  0.00      MON1  
ATOM   2741  CB  TYR M 177      46.297  64.259  74.700  0.00  0.00      MON1  
ATOM   2742  HB1 TYR M 177      47.192  64.155  74.055  0.00  0.00      MON1  
ATOM   2743  HB2 TYR M 177      45.441  63.790  74.165  0.00  0.00      MON1  
ATOM   2744  CG  TYR M 177      46.529  63.512  75.970  0.00  0.00      MON1  
ATOM   2745  CD1 TYR M 177      45.451  62.928  76.642  0.00  0.00      MON1  
ATOM   2746  HD1 TYR M 177      44.451  63.025  76.244  0.00  0.00      MON1  
ATOM   2747  CE1 TYR M 177      45.661  62.235  77.838  0.00  0.00      MON1  
ATOM   2748  HE1 TYR M 177      44.827  61.800  78.371  0.00  0.00      MON1  
ATOM   2749  CZ  TYR M 177      46.953  62.094  78.345  0.00  0.00      MON1  
ATOM   2750  OH  TYR M 177      47.175  61.407  79.551  0.00  0.00      MON1  
ATOM   2751  HH  TYR M 177      48.115  61.233  79.598  0.00  0.00      MON1  
ATOM   2752  CD2 TYR M 177      47.813  63.388  76.499  0.00  0.00      MON1  
ATOM   2753  HD2 TYR M 177      48.633  63.902  76.034  0.00  0.00      MON1  
ATOM   2754  CE2 TYR M 177      48.032  62.634  77.647  0.00  0.00      MON1  
ATOM   2755  HE2 TYR M 177      49.045  62.455  77.965  0.00  0.00      MON1  
ATOM   2756  C   TYR M 177      47.174  66.422  75.613  0.00  0.00      MON1  
ATOM   2757  O   TYR M 177      47.228  66.660  76.818  0.00  0.00      MON1  
ATOM   2758  N   THR M 178      48.167  66.776  74.757  0.00  0.00      MON1  
ATOM   2759  HN  THR M 178      48.093  66.493  73.795  0.00  0.00      MON1  
ATOM   2760  CA  THR M 178      49.396  67.501  75.107  0.00  0.00      MON1  
ATOM   2761  HA  THR M 178      49.916  66.914  75.849  0.00  0.00      MON1  
ATOM   2762  CB  THR M 178      50.328  67.728  73.894  0.00  0.00      MON1  
ATOM   2763  HB  THR M 178      49.836  68.407  73.159  0.00  0.00      MON1  
ATOM   2764  OG1 THR M 178      50.614  66.514  73.225  0.00  0.00      MON1  
ATOM   2765  HG1 THR M 178      51.410  66.695  72.715  0.00  0.00      MON1  
ATOM   2766  CG2 THR M 178      51.698  68.303  74.287  0.00  0.00      MON1  
ATOM   2767 HG21 THR M 178      52.223  67.615  74.986  0.00  0.00      MON1  
ATOM   2768 HG22 THR M 178      51.589  69.287  74.790  0.00  0.00      MON1  
ATOM   2769 HG23 THR M 178      52.340  68.455  73.393  0.00  0.00      MON1  
ATOM   2770  C   THR M 178      49.091  68.857  75.721  0.00  0.00      MON1  
ATOM   2771  O   THR M 178      49.503  69.147  76.840  0.00  0.00      MON1  
ATOM   2772  N   PHE M 179      48.256  69.680  75.054  0.00  0.00      MON1  
ATOM   2773  HN  PHE M 179      47.895  69.398  74.156  0.00  0.00      MON1  
ATOM   2774  CA  PHE M 179      47.778  70.967  75.533  0.00  0.00      MON1  
ATOM   2775  HA  PHE M 179      48.645  71.582  75.738  0.00  0.00      MON1  
ATOM   2776  CB  PHE M 179      46.858  71.684  74.504  0.00  0.00      MON1  
ATOM   2777  HB1 PHE M 179      46.331  72.536  74.988  0.00  0.00      MON1  
ATOM   2778  HB2 PHE M 179      46.098  70.965  74.126  0.00  0.00      MON1  
ATOM   2779  CG  PHE M 179      47.568  72.265  73.308  0.00  0.00      MON1  
ATOM   2780  CD1 PHE M 179      48.932  72.064  73.022  0.00  0.00      MON1  
ATOM   2781  HD1 PHE M 179      49.562  71.473  73.667  0.00  0.00      MON1  
ATOM   2782  CE1 PHE M 179      49.504  72.608  71.868  0.00  0.00      MON1  
ATOM   2783  HE1 PHE M 179      50.534  72.395  71.632  0.00  0.00      MON1  
ATOM   2784  CZ  PHE M 179      48.732  73.391  71.004  0.00  0.00      MON1  
ATOM   2785  HZ  PHE M 179      49.165  73.776  70.094  0.00  0.00      MON1  
ATOM   2786  CD2 PHE M 179      46.807  73.058  72.428  0.00  0.00      MON1  
ATOM   2787  HD2 PHE M 179      45.759  73.221  72.630  0.00  0.00      MON1  
ATOM   2788  CE2 PHE M 179      47.383  73.625  71.286  0.00  0.00      MON1  
ATOM   2789  HE2 PHE M 179      46.785  74.221  70.611  0.00  0.00      MON1  
ATOM   2790  C   PHE M 179      47.017  70.869  76.855  0.00  0.00      MON1  
ATOM   2791  O   PHE M 179      47.127  71.766  77.695  0.00  0.00      MON1  
ATOM   2792  N   TYR M 180      46.214  69.799  77.073  0.00  0.00      MON1  
ATOM   2793  HN  TYR M 180      46.060  69.106  76.365  0.00  0.00      MON1  
ATOM   2794  CA  TYR M 180      45.509  69.635  78.324  0.00  0.00      MON1  
ATOM   2795  HA  TYR M 180      45.051  70.588  78.564  0.00  0.00      MON1  
ATOM   2796  CB  TYR M 180      44.431  68.537  78.243  0.00  0.00      MON1  
ATOM   2797  HB1 TYR M 180      44.844  67.506  78.286  0.00  0.00      MON1  
ATOM   2798  HB2 TYR M 180      43.867  68.637  77.289  0.00  0.00      MON1  
ATOM   2799  CG  TYR M 180      43.482  68.768  79.377  0.00  0.00      MON1  
ATOM   2800  CD1 TYR M 180      42.408  69.644  79.188  0.00  0.00      MON1  
ATOM   2801  HD1 TYR M 180      42.266  70.120  78.229  0.00  0.00      MON1  
ATOM   2802  CE1 TYR M 180      41.522  69.914  80.233  0.00  0.00      MON1  
ATOM   2803  HE1 TYR M 180      40.694  70.591  80.086  0.00  0.00      MON1  
ATOM   2804  CZ  TYR M 180      41.706  69.308  81.475  0.00  0.00      MON1  
ATOM   2805  OH  TYR M 180      40.799  69.584  82.511  0.00  0.00      MON1  
ATOM   2806  HH  TYR M 180      40.893  68.908  83.185  0.00  0.00      MON1  
ATOM   2807  CD2 TYR M 180      43.668  68.165  80.628  0.00  0.00      MON1  
ATOM   2808  HD2 TYR M 180      44.495  67.487  80.777  0.00  0.00      MON1  
ATOM   2809  CE2 TYR M 180      42.774  68.431  81.670  0.00  0.00      MON1  
ATOM   2810  HE2 TYR M 180      42.882  67.925  82.612  0.00  0.00      MON1  
ATOM   2811  C   TYR M 180      46.462  69.299  79.443  0.00  0.00      MON1  
ATOM   2812  O   TYR M 180      46.400  69.861  80.528  0.00  0.00      MON1  
ATOM   2813  N   LEU M 181      47.395  68.361  79.219  0.00  0.00      MON1  
ATOM   2814  HN  LEU M 181      47.437  67.863  78.346  0.00  0.00      MON1  
ATOM   2815  CA  LEU M 181      48.373  68.032  80.229  0.00  0.00      MON1  
ATOM   2816  HA  LEU M 181      47.854  67.811  81.148  0.00  0.00      MON1  
ATOM   2817  CB  LEU M 181      49.277  66.861  79.824  0.00  0.00      MON1  
ATOM   2818  HB1 LEU M 181      50.161  66.788  80.499  0.00  0.00      MON1  
ATOM   2819  HB2 LEU M 181      49.628  67.041  78.785  0.00  0.00      MON1  
ATOM   2820  CG  LEU M 181      48.597  65.489  79.815  0.00  0.00      MON1  
ATOM   2821  HG  LEU M 181      47.840  65.457  78.993  0.00  0.00      MON1  
ATOM   2822  CD1 LEU M 181      49.654  64.423  79.534  0.00  0.00      MON1  
ATOM   2823 HD11 LEU M 181      50.547  64.593  80.172  0.00  0.00      MON1  
ATOM   2824 HD12 LEU M 181      49.973  64.466  78.470  0.00  0.00      MON1  
ATOM   2825 HD13 LEU M 181      49.265  63.418  79.786  0.00  0.00      MON1  
ATOM   2826  CD2 LEU M 181      47.858  65.191  81.127  0.00  0.00      MON1  
ATOM   2827 HD21 LEU M 181      47.001  65.883  81.261  0.00  0.00      MON1  
ATOM   2828 HD22 LEU M 181      48.545  65.280  81.990  0.00  0.00      MON1  
ATOM   2829 HD23 LEU M 181      47.451  64.156  81.097  0.00  0.00      MON1  
ATOM   2830  C   LEU M 181      49.251  69.200  80.546  0.00  0.00      MON1  
ATOM   2831  O   LEU M 181      49.519  69.465  81.714  0.00  0.00      MON1  
ATOM   2832  N   ALA M 182      49.683  69.949  79.513  0.00  0.00      MON1  
ATOM   2833  HN  ALA M 182      49.476  69.685  78.564  0.00  0.00      MON1  
ATOM   2834  CA  ALA M 182      50.537  71.100  79.680  0.00  0.00      MON1  
ATOM   2835  HA  ALA M 182      51.446  70.786  80.174  0.00  0.00      MON1  
ATOM   2836  CB  ALA M 182      50.873  71.769  78.342  0.00  0.00      MON1  
ATOM   2837  HB1 ALA M 182      49.955  72.101  77.812  0.00  0.00      MON1  
ATOM   2838  HB2 ALA M 182      51.399  71.046  77.682  0.00  0.00      MON1  
ATOM   2839  HB3 ALA M 182      51.539  72.648  78.483  0.00  0.00      MON1  
ATOM   2840  C   ALA M 182      49.878  72.120  80.548  0.00  0.00      MON1  
ATOM   2841  O   ALA M 182      50.500  72.695  81.431  0.00  0.00      MON1  
ATOM   2842  N   ALA M 183      48.564  72.297  80.362  0.00  0.00      MON1  
ATOM   2843  HN  ALA M 183      48.089  71.802  79.636  0.00  0.00      MON1  
ATOM   2844  CA  ALA M 183      47.774  73.184  81.152  0.00  0.00      MON1  
ATOM   2845  HA  ALA M 183      48.106  74.181  80.976  0.00  0.00      MON1  
ATOM   2846  CB  ALA M 183      46.326  72.747  80.899  0.00  0.00      MON1  
ATOM   2847  HB1 ALA M 183      46.023  71.818  81.409  0.00  0.00      MON1  
ATOM   2848  HB2 ALA M 183      46.209  72.369  79.863  0.00  0.00      MON1  
ATOM   2849  HB3 ALA M 183      45.440  73.283  81.222  0.00  0.00      MON1  
ATOM   2850  C   ALA M 183      47.888  72.914  82.585  0.00  0.00      MON1  
ATOM   2851  O   ALA M 183      48.190  73.783  83.379  0.00  0.00      MON1  
ATOM   2852  N   LYS M 184      47.697  71.641  82.945  0.00  0.00      MON1  
ATOM   2853  HN  LYS M 184      47.504  70.962  82.237  0.00  0.00      MON1  
ATOM   2854  CA  LYS M 184      47.688  71.218  84.306  0.00  0.00      MON1  
ATOM   2855  HA  LYS M 184      46.960  71.809  84.845  0.00  0.00      MON1  
ATOM   2856  CB  LYS M 184      47.368  69.720  84.462  0.00  0.00      MON1  
ATOM   2857  HB1 LYS M 184      47.466  69.430  85.532  0.00  0.00      MON1  
ATOM   2858  HB2 LYS M 184      48.101  69.126  83.869  0.00  0.00      MON1  
ATOM   2859  CG  LYS M 184      45.953  69.356  84.002  0.00  0.00      MON1  
ATOM   2860  HG1 LYS M 184      45.819  69.711  82.953  0.00  0.00      MON1  
ATOM   2861  HG2 LYS M 184      45.192  69.892  84.608  0.00  0.00      MON1  
ATOM   2862  CD  LYS M 184      45.683  67.838  84.005  0.00  0.00      MON1  
ATOM   2863  HD1 LYS M 184      46.512  67.329  83.464  0.00  0.00      MON1  
ATOM   2864  HD2 LYS M 184      44.759  67.661  83.420  0.00  0.00      MON1  
ATOM   2865  CE  LYS M 184      45.495  67.222  85.399  0.00  0.00      MON1  
ATOM   2866  HE1 LYS M 184      44.737  67.771  85.988  0.00  0.00      MON1  
ATOM   2867  HE2 LYS M 184      46.451  67.272  85.963  0.00  0.00      MON1  
ATOM   2868  NZ  LYS M 184      45.087  65.794  85.341  0.00  0.00      MON1  
ATOM   2869  HZ1 LYS M 184      45.779  65.159  84.922  0.00  0.00      MON1  
ATOM   2870  HZ2 LYS M 184      44.169  65.676  84.858  0.00  0.00      MON1  
ATOM   2871  HZ3 LYS M 184      44.868  65.493  86.344  0.00  0.00      MON1  
ATOM   2872  C   LYS M 184      49.018  71.489  84.919  0.00  0.00      MON1  
ATOM   2873  O   LYS M 184      49.106  71.888  86.076  0.00  0.00      MON1  
ATOM   2874  N   VAL M 185      50.099  71.269  84.144  0.00  0.00      MON1  
ATOM   2875  HN  VAL M 185      49.988  70.992  83.186  0.00  0.00      MON1  
ATOM   2876  CA  VAL M 185      51.435  71.552  84.606  0.00  0.00      MON1  
ATOM   2877  HA  VAL M 185      51.619  71.011  85.521  0.00  0.00      MON1  
ATOM   2878  CB  VAL M 185      52.503  71.210  83.593  0.00  0.00      MON1  
ATOM   2879  HB  VAL M 185      52.396  71.809  82.659  0.00  0.00      MON1  
ATOM   2880  CG1 VAL M 185      53.867  71.524  84.226  0.00  0.00      MON1  
ATOM   2881 HG11 VAL M 185      53.904  71.210  85.291  0.00  0.00      MON1  
ATOM   2882 HG12 VAL M 185      54.123  72.603  84.161  0.00  0.00      MON1  
ATOM   2883 HG13 VAL M 185      54.645  70.943  83.690  0.00  0.00      MON1  
ATOM   2884  CG2 VAL M 185      52.434  69.729  83.205  0.00  0.00      MON1  
ATOM   2885 HG21 VAL M 185      51.451  69.438  82.818  0.00  0.00      MON1  
ATOM   2886 HG22 VAL M 185      52.709  69.106  84.078  0.00  0.00      MON1  
ATOM   2887 HG23 VAL M 185      53.181  69.525  82.405  0.00  0.00      MON1  
ATOM   2888  C   VAL M 185      51.590  73.006  84.934  0.00  0.00      MON1  
ATOM   2889  O   VAL M 185      52.096  73.355  85.996  0.00  0.00      MON1  
ATOM   2890  N   LEU M 186      51.101  73.888  84.045  0.00  0.00      MON1  
ATOM   2891  HN  LEU M 186      50.694  73.577  83.181  0.00  0.00      MON1  
ATOM   2892  CA  LEU M 186      51.149  75.313  84.259  0.00  0.00      MON1  
ATOM   2893  HA  LEU M 186      52.177  75.611  84.394  0.00  0.00      MON1  
ATOM   2894  CB  LEU M 186      50.497  76.115  83.122  0.00  0.00      MON1  
ATOM   2895  HB1 LEU M 186      50.520  77.203  83.372  0.00  0.00      MON1  
ATOM   2896  HB2 LEU M 186      49.431  75.828  82.992  0.00  0.00      MON1  
ATOM   2897  CG  LEU M 186      51.186  75.963  81.768  0.00  0.00      MON1  
ATOM   2898  HG  LEU M 186      51.199  74.894  81.469  0.00  0.00      MON1  
ATOM   2899  CD1 LEU M 186      50.382  76.722  80.738  0.00  0.00      MON1  
ATOM   2900 HD11 LEU M 186      49.835  77.561  81.203  0.00  0.00      MON1  
ATOM   2901 HD12 LEU M 186      49.619  75.998  80.372  0.00  0.00      MON1  
ATOM   2902 HD13 LEU M 186      50.996  77.045  79.873  0.00  0.00      MON1  
ATOM   2903  CD2 LEU M 186      52.644  76.406  81.800  0.00  0.00      MON1  
ATOM   2904 HD21 LEU M 186      53.212  75.873  82.588  0.00  0.00      MON1  
ATOM   2905 HD22 LEU M 186      52.710  77.495  82.016  0.00  0.00      MON1  
ATOM   2906 HD23 LEU M 186      53.128  76.219  80.817  0.00  0.00      MON1  
ATOM   2907  C   LEU M 186      50.394  75.700  85.486  0.00  0.00      MON1  
ATOM   2908  O   LEU M 186      50.861  76.484  86.306  0.00  0.00      MON1  
ATOM   2909  N   ILE M 187      49.199  75.125  85.657  0.00  0.00      MON1  
ATOM   2910  HN  ILE M 187      48.811  74.535  84.944  0.00  0.00      MON1  
ATOM   2911  CA  ILE M 187      48.381  75.431  86.798  0.00  0.00      MON1  
ATOM   2912  HA  ILE M 187      48.167  76.491  86.826  0.00  0.00      MON1  
ATOM   2913  CB  ILE M 187      47.106  74.651  86.792  0.00  0.00      MON1  
ATOM   2914  HB  ILE M 187      47.331  73.557  86.753  0.00  0.00      MON1  
ATOM   2915  CG2 ILE M 187      46.374  74.933  88.129  0.00  0.00      MON1  
ATOM   2916 HG21 ILE M 187      46.589  75.960  88.484  0.00  0.00      MON1  
ATOM   2917 HG22 ILE M 187      46.772  74.350  88.973  0.00  0.00      MON1  
ATOM   2918 HG23 ILE M 187      45.281  74.768  88.081  0.00  0.00      MON1  
ATOM   2919  CG1 ILE M 187      46.280  74.937  85.539  0.00  0.00      MON1  
ATOM   2920 HG11 ILE M 187      46.830  74.805  84.624  0.00  0.00      MON1  
ATOM   2921 HG12 ILE M 187      45.964  75.986  85.443  0.00  0.00      MON1  
ATOM   2922  CD  ILE M 187      45.112  73.990  85.590  0.00  0.00      MON1  
ATOM   2923  HD1 ILE M 187      44.212  74.510  85.904  0.00  0.00      MON1  
ATOM   2924  HD2 ILE M 187      45.277  73.288  86.424  0.00  0.00      MON1  
ATOM   2925  HD3 ILE M 187      45.061  73.315  84.718  0.00  0.00      MON1  
ATOM   2926  C   ILE M 187      49.065  75.045  88.071  0.00  0.00      MON1  
ATOM   2927  O   ILE M 187      49.152  75.810  89.022  0.00  0.00      MON1  
ATOM   2928  N   GLU M 188      49.601  73.815  88.105  0.00  0.00      MON1  
ATOM   2929  HN  GLU M 188      49.531  73.222  87.297  0.00  0.00      MON1  
ATOM   2930  CA  GLU M 188      50.282  73.314  89.263  0.00  0.00      MON1  
ATOM   2931  HA  GLU M 188      49.628  73.419  90.118  0.00  0.00      MON1  
ATOM   2932  CB  GLU M 188      50.679  71.851  89.068  0.00  0.00      MON1  
ATOM   2933  HB1 GLU M 188      51.338  71.784  88.167  0.00  0.00      MON1  
ATOM   2934  HB2 GLU M 188      49.764  71.283  88.807  0.00  0.00      MON1  
ATOM   2935  CG  GLU M 188      51.431  71.235  90.266  0.00  0.00      MON1  
ATOM   2936  HG1 GLU M 188      50.944  71.374  91.218  0.00  0.00      MON1  
ATOM   2937  HG2 GLU M 188      52.433  71.715  90.366  0.00  0.00      MON1  
ATOM   2938  CD  GLU M 188      51.722  69.770  90.012  0.00  0.00      MON1  
ATOM   2939  OE1 GLU M 188      51.373  69.313  88.885  0.00  0.00      MON1  
ATOM   2940  OE2 GLU M 188      52.189  69.085  90.945  0.00  0.00      MON1  
ATOM   2941  C   GLU M 188      51.514  74.108  89.559  0.00  0.00      MON1  
ATOM   2942  O   GLU M 188      51.815  74.412  90.708  0.00  0.00      MON1  
ATOM   2943  N   SER M 189      52.261  74.483  88.508  0.00  0.00      MON1  
ATOM   2944  HN  SER M 189      52.032  74.159  87.583  0.00  0.00      MON1  
ATOM   2945  CA  SER M 189      53.464  75.266  88.655  0.00  0.00      MON1  
ATOM   2946  HA  SER M 189      54.100  74.738  89.342  0.00  0.00      MON1  
ATOM   2947  CB  SER M 189      54.232  75.463  87.335  0.00  0.00      MON1  
ATOM   2948  HB1 SER M 189      54.435  74.465  86.882  0.00  0.00      MON1  
ATOM   2949  HB2 SER M 189      55.214  75.952  87.523  0.00  0.00      MON1  
ATOM   2950  OG  SER M 189      53.507  76.253  86.404  0.00  0.00      MON1  
ATOM   2951  HG1 SER M 189      52.572  75.991  86.418  0.00  0.00      MON1  
ATOM   2952  C   SER M 189      53.167  76.605  89.262  0.00  0.00      MON1  
ATOM   2953  O   SER M 189      53.915  77.090  90.104  0.00  0.00      MON1  
ATOM   2954  N   PHE M 190      52.029  77.209  88.869  0.00  0.00      MON1  
ATOM   2955  HN  PHE M 190      51.445  76.790  88.171  0.00  0.00      MON1  
ATOM   2956  CA  PHE M 190      51.604  78.491  89.353  0.00  0.00      MON1  
ATOM   2957  HA  PHE M 190      52.357  79.224  89.099  0.00  0.00      MON1  
ATOM   2958  CB  PHE M 190      50.238  78.839  88.715  0.00  0.00      MON1  
ATOM   2959  HB1 PHE M 190      49.450  78.110  88.989  0.00  0.00      MON1  
ATOM   2960  HB2 PHE M 190      50.328  78.820  87.606  0.00  0.00      MON1  
ATOM   2961  CG  PHE M 190      49.769  80.172  89.165  0.00  0.00      MON1  
ATOM   2962  CD1 PHE M 190      49.019  80.361  90.339  0.00  0.00      MON1  
ATOM   2963  HD1 PHE M 190      48.743  79.502  90.935  0.00  0.00      MON1  
ATOM   2964  CE1 PHE M 190      48.612  81.646  90.717  0.00  0.00      MON1  
ATOM   2965  HE1 PHE M 190      48.007  81.785  91.601  0.00  0.00      MON1  
ATOM   2966  CZ  PHE M 190      48.958  82.742  89.916  0.00  0.00      MON1  
ATOM   2967  HZ  PHE M 190      48.672  83.738  90.204  0.00  0.00      MON1  
ATOM   2968  CD2 PHE M 190      50.104  81.250  88.383  0.00  0.00      MON1  
ATOM   2969  HD2 PHE M 190      50.709  81.101  87.495  0.00  0.00      MON1  
ATOM   2970  CE2 PHE M 190      49.709  82.504  88.764  0.00  0.00      MON1  
ATOM   2971  HE2 PHE M 190      50.187  83.161  88.119  0.00  0.00      MON1  
ATOM   2972  C   PHE M 190      51.451  78.467  90.853  0.00  0.00      MON1  
ATOM   2973  O   PHE M 190      51.966  79.324  91.566  0.00  0.00      MON1  
ATOM   2974  N   HSE M 191      50.753  77.442  91.362  0.00  0.00      MON1  
ATOM   2975  HN  HSE M 191      50.273  76.809  90.746  0.00  0.00      MON1  
ATOM   2976  CA  HSE M 191      50.532  77.284  92.774  0.00  0.00      MON1  
ATOM   2977  HA  HSE M 191      50.226  78.235  93.177  0.00  0.00      MON1  
ATOM   2978  CB  HSE M 191      49.434  76.255  93.063  0.00  0.00      MON1  
ATOM   2979  HB1 HSE M 191      49.428  75.940  94.130  0.00  0.00      MON1  
ATOM   2980  HB2 HSE M 191      49.610  75.359  92.427  0.00  0.00      MON1  
ATOM   2981  ND1 HSE M 191      47.623  76.977  91.483  0.00  0.00      MON1  
ATOM   2982  CG  HSE M 191      48.064  76.801  92.774  0.00  0.00      MON1  
ATOM   2983  CE1 HSE M 191      46.385  77.428  91.587  0.00  0.00      MON1  
ATOM   2984  HE1 HSE M 191      45.722  77.613  90.747  0.00  0.00      MON1  
ATOM   2985  NE2 HSE M 191      46.007  77.567  92.875  0.00  0.00      MON1  
ATOM   2986  HE2 HSE M 191      45.069  77.743  93.179  0.00  0.00      MON1  
ATOM   2987  CD2 HSE M 191      47.081  77.162  93.640  0.00  0.00      MON1  
ATOM   2988  HD2 HSE M 191      47.086  77.153  94.720  0.00  0.00      MON1  
ATOM   2989  C   HSE M 191      51.770  76.866  93.503  0.00  0.00      MON1  
ATOM   2990  O   HSE M 191      51.900  77.157  94.681  0.00  0.00      MON1  
ATOM   2991  N   GLN M 192      52.678  76.150  92.835  0.00  0.00      MON1  
ATOM   2992  HN  GLN M 192      52.482  75.856  91.897  0.00  0.00      MON1  
ATOM   2993  CA  GLN M 192      53.921  75.692  93.398  0.00  0.00      MON1  
ATOM   2994  HA  GLN M 192      53.720  75.149  94.312  0.00  0.00      MON1  
ATOM   2995  CB  GLN M 192      54.593  74.759  92.391  0.00  0.00      MON1  
ATOM   2996  HB1 GLN M 192      54.675  75.335  91.450  0.00  0.00      MON1  
ATOM   2997  HB2 GLN M 192      53.889  73.910  92.208  0.00  0.00      MON1  
ATOM   2998  CG  GLN M 192      55.960  74.187  92.801  0.00  0.00      MON1  
ATOM   2999  HG1 GLN M 192      55.860  73.554  93.711  0.00  0.00      MON1  
ATOM   3000  HG2 GLN M 192      56.704  74.983  92.999  0.00  0.00      MON1  
ATOM   3001  CD  GLN M 192      56.480  73.315  91.665  0.00  0.00      MON1  
ATOM   3002  OE1 GLN M 192      57.167  72.321  91.876  0.00  0.00      MON1  
ATOM   3003  NE2 GLN M 192      56.182  73.707  90.402  0.00  0.00      MON1  
ATOM   3004 HE21 GLN M 192      56.428  73.074  89.670  0.00  0.00      MON1  
ATOM   3005 HE22 GLN M 192      55.635  74.524  90.264  0.00  0.00      MON1  
ATOM   3006  C   GLN M 192      54.866  76.806  93.724  0.00  0.00      MON1  
ATOM   3007  O   GLN M 192      55.411  76.864  94.810  0.00  0.00      MON1  
ATOM   3008  N   VAL M 193      55.055  77.750  92.795  0.00  0.00      MON1  
ATOM   3009  HN  VAL M 193      54.555  77.718  91.927  0.00  0.00      MON1  
ATOM   3010  CA  VAL M 193      56.043  78.786  92.934  0.00  0.00      MON1  
ATOM   3011  HA  VAL M 193      56.916  78.274  93.301  0.00  0.00      MON1  
ATOM   3012  CB  VAL M 193      56.404  79.437  91.617  0.00  0.00      MON1  
ATOM   3013  HB  VAL M 193      57.157  80.234  91.762  0.00  0.00      MON1  
ATOM   3014  CG1 VAL M 193      57.070  78.382  90.720  0.00  0.00      MON1  
ATOM   3015 HG11 VAL M 193      56.382  77.538  90.506  0.00  0.00      MON1  
ATOM   3016 HG12 VAL M 193      57.986  77.984  91.203  0.00  0.00      MON1  
ATOM   3017 HG13 VAL M 193      57.355  78.840  89.750  0.00  0.00      MON1  
ATOM   3018  CG2 VAL M 193      55.156  80.077  90.991  0.00  0.00      MON1  
ATOM   3019 HG21 VAL M 193      54.746  80.868  91.647  0.00  0.00      MON1  
ATOM   3020 HG22 VAL M 193      54.362  79.334  90.794  0.00  0.00      MON1  
ATOM   3021 HG23 VAL M 193      55.423  80.550  90.022  0.00  0.00      MON1  
ATOM   3022  C   VAL M 193      55.614  79.855  93.910  0.00  0.00      MON1  
ATOM   3023  O   VAL M 193      54.424  80.010  94.229  0.00  0.00      MON1  
ATOM   3024  N   PRO M 194      56.586  80.607  94.404  0.00  0.00      MON1  
ATOM   3025  CD  PRO M 194      58.011  80.257  94.353  0.00  0.00      MON1  
ATOM   3026  HD1 PRO M 194      58.433  80.572  93.374  0.00  0.00      MON1  
ATOM   3027  HD2 PRO M 194      58.220  79.178  94.514  0.00  0.00      MON1  
ATOM   3028  CA  PRO M 194      56.338  81.715  95.298  0.00  0.00      MON1  
ATOM   3029  HA  PRO M 194      55.872  81.302  96.183  0.00  0.00      MON1  
ATOM   3030  CB  PRO M 194      57.723  82.288  95.590  0.00  0.00      MON1  
ATOM   3031  HB1 PRO M 194      57.791  82.768  96.588  0.00  0.00      MON1  
ATOM   3032  HB2 PRO M 194      57.980  83.028  94.804  0.00  0.00      MON1  
ATOM   3033  CG  PRO M 194      58.665  81.093  95.443  0.00  0.00      MON1  
ATOM   3034  HG1 PRO M 194      59.703  81.390  95.189  0.00  0.00      MON1  
ATOM   3035  HG2 PRO M 194      58.694  80.552  96.408  0.00  0.00      MON1  
ATOM   3036  C   PRO M 194      55.388  82.736  94.723  0.00  0.00      MON1  
ATOM   3037  O   PRO M 194      55.315  82.885  93.509  0.00  0.00      MON1  
ATOM   3038  N   LYS M 195      54.671  83.442  95.608  0.00  0.00      MON1  
ATOM   3039  HN  LYS M 195      54.852  83.299  96.576  0.00  0.00      MON1  
ATOM   3040  CA  LYS M 195      53.558  84.325  95.332  0.00  0.00      MON1  
ATOM   3041  HA  LYS M 195      52.784  83.740  94.863  0.00  0.00      MON1  
ATOM   3042  CB  LYS M 195      53.020  84.945  96.643  0.00  0.00      MON1  
ATOM   3043  HB1 LYS M 195      52.170  85.634  96.423  0.00  0.00      MON1  
ATOM   3044  HB2 LYS M 195      53.827  85.552  97.117  0.00  0.00      MON1  
ATOM   3045  CG  LYS M 195      52.528  83.930  97.682  0.00  0.00      MON1  
ATOM   3046  HG1 LYS M 195      52.258  84.497  98.607  0.00  0.00      MON1  
ATOM   3047  HG2 LYS M 195      53.352  83.237  97.963  0.00  0.00      MON1  
ATOM   3048  CD  LYS M 195      51.301  83.123  97.233  0.00  0.00      MON1  
ATOM   3049  HD1 LYS M 195      51.556  82.562  96.309  0.00  0.00      MON1  
ATOM   3050  HD2 LYS M 195      50.490  83.849  96.992  0.00  0.00      MON1  
ATOM   3051  CE  LYS M 195      50.837  82.148  98.321  0.00  0.00      MON1  
ATOM   3052  HE1 LYS M 195      50.700  82.683  99.287  0.00  0.00      MON1  
ATOM   3053  HE2 LYS M 195      51.588  81.339  98.463  0.00  0.00      MON1  
ATOM   3054  NZ  LYS M 195      49.544  81.529  97.960  0.00  0.00      MON1  
ATOM   3055  HZ1 LYS M 195      49.583  81.098  97.020  0.00  0.00      MON1  
ATOM   3056  HZ2 LYS M 195      48.798  82.260  97.987  0.00  0.00      MON1  
ATOM   3057  HZ3 LYS M 195      49.310  80.807  98.675  0.00  0.00      MON1  
ATOM   3058  C   LYS M 195      53.844  85.483  94.411  0.00  0.00      MON1  
ATOM   3059  O   LYS M 195      52.933  85.986  93.758  0.00  0.00      MON1  
ATOM   3060  N   GLY M 196      55.089  85.983  94.390  0.00  0.00      MON1  
ATOM   3061  HN  GLY M 196      55.818  85.537  94.901  0.00  0.00      MON1  
ATOM   3062  CA  GLY M 196      55.382  87.225  93.701  0.00  0.00      MON1  
ATOM   3063  HA1 GLY M 196      56.293  87.613  94.131  0.00  0.00      MON1  
ATOM   3064  HA2 GLY M 196      54.558  87.915  93.824  0.00  0.00      MON1  
ATOM   3065  C   GLY M 196      55.594  87.053  92.228  0.00  0.00      MON1  
ATOM   3066  O   GLY M 196      54.759  86.548  91.478  0.00  0.00      MON1  
ATOM   3067  N   ILE M 197      56.771  87.514  91.784  0.00  0.00      MON1  
ATOM   3068  HN  ILE M 197      57.407  87.920  92.437  0.00  0.00      MON1  
ATOM   3069  CA  ILE M 197      57.198  87.569  90.408  0.00  0.00      MON1  
ATOM   3070  HA  ILE M 197      56.536  88.231  89.868  0.00  0.00      MON1  
ATOM   3071  CB  ILE M 197      58.625  88.070  90.318  0.00  0.00      MON1  
ATOM   3072  HB  ILE M 197      58.694  89.070  90.796  0.00  0.00      MON1  
ATOM   3073  CG2 ILE M 197      59.581  87.085  90.997  0.00  0.00      MON1  
ATOM   3074 HG21 ILE M 197      59.672  86.132  90.438  0.00  0.00      MON1  
ATOM   3075 HG22 ILE M 197      59.304  86.854  92.038  0.00  0.00      MON1  
ATOM   3076 HG23 ILE M 197      60.606  87.453  90.970  0.00  0.00      MON1  
ATOM   3077  CG1 ILE M 197      59.014  88.124  88.864  0.00  0.00      MON1  
ATOM   3078 HG11 ILE M 197      58.143  88.515  88.352  0.00  0.00      MON1  
ATOM   3079 HG12 ILE M 197      59.030  87.080  88.456  0.00  0.00      MON1  
ATOM   3080  CD  ILE M 197      60.447  88.502  88.540  0.00  0.00      MON1  
ATOM   3081  HD1 ILE M 197      60.629  88.017  87.556  0.00  0.00      MON1  
ATOM   3082  HD2 ILE M 197      61.140  87.986  89.212  0.00  0.00      MON1  
ATOM   3083  HD3 ILE M 197      60.791  89.492  88.373  0.00  0.00      MON1  
ATOM   3084  C   ILE M 197      57.151  86.227  89.735  0.00  0.00      MON1  
ATOM   3085  O   ILE M 197      56.856  86.120  88.547  0.00  0.00      MON1  
ATOM   3086  N   CYS M 198      57.458  85.149  90.484  0.00  0.00      MON1  
ATOM   3087  HN  CYS M 198      57.683  85.260  91.446  0.00  0.00      MON1  
ATOM   3088  CA  CYS M 198      57.581  83.836  89.925  0.00  0.00      MON1  
ATOM   3089  HA  CYS M 198      58.352  83.850  89.168  0.00  0.00      MON1  
ATOM   3090  CB  CYS M 198      57.885  82.788  91.014  0.00  0.00      MON1  
ATOM   3091  HB1 CYS M 198      57.786  81.773  90.590  0.00  0.00      MON1  
ATOM   3092  HB2 CYS M 198      57.118  82.872  91.815  0.00  0.00      MON1  
ATOM   3093  SG  CYS M 198      59.531  82.980  91.749  0.00  0.00      MON1  
ATOM   3094  HG1 CYS M 198      60.199  82.459  90.725  0.00  0.00      MON1  
ATOM   3095  C   CYS M 198      56.299  83.456  89.251  0.00  0.00      MON1  
ATOM   3096  O   CYS M 198      56.302  82.924  88.152  0.00  0.00      MON1  
ATOM   3097  N   ARG M 199      55.158  83.782  89.880  0.00  0.00      MON1  
ATOM   3098  HN  ARG M 199      55.179  84.259  90.758  0.00  0.00      MON1  
ATOM   3099  CA  ARG M 199      53.865  83.522  89.307  0.00  0.00      MON1  
ATOM   3100  HA  ARG M 199      53.837  82.477  89.026  0.00  0.00      MON1  
ATOM   3101  CB  ARG M 199      52.730  83.773  90.318  0.00  0.00      MON1  
ATOM   3102  HB1 ARG M 199      51.744  83.701  89.821  0.00  0.00      MON1  
ATOM   3103  HB2 ARG M 199      52.830  84.796  90.749  0.00  0.00      MON1  
ATOM   3104  CG  ARG M 199      52.789  82.731  91.442  0.00  0.00      MON1  
ATOM   3105  HG1 ARG M 199      53.741  82.863  91.970  0.00  0.00      MON1  
ATOM   3106  HG2 ARG M 199      52.805  81.724  90.957  0.00  0.00      MON1  
ATOM   3107  CD  ARG M 199      51.630  82.744  92.431  0.00  0.00      MON1  
ATOM   3108  HD1 ARG M 199      50.686  82.596  91.875  0.00  0.00      MON1  
ATOM   3109  HD2 ARG M 199      51.595  83.713  92.977  0.00  0.00      MON1  
ATOM   3110  NE  ARG M 199      51.850  81.628  93.410  0.00  0.00      MON1  
ATOM   3111  HE  ARG M 199      52.745  81.169  93.424  0.00  0.00      MON1  
ATOM   3112  CZ  ARG M 199      50.873  81.028  94.085  0.00  0.00      MON1  
ATOM   3113  NH1 ARG M 199      49.615  81.425  93.978  0.00  0.00      MON1  
ATOM   3114 HH11 ARG M 199      48.889  80.912  94.423  0.00  0.00      MON1  
ATOM   3115 HH12 ARG M 199      49.429  82.118  93.295  0.00  0.00      MON1  
ATOM   3116  NH2 ARG M 199      51.172  80.030  94.899  0.00  0.00      MON1  
ATOM   3117 HH21 ARG M 199      52.118  79.694  94.825  0.00  0.00      MON1  
ATOM   3118 HH22 ARG M 199      50.496  79.330  95.084  0.00  0.00      MON1  
ATOM   3119  C   ARG M 199      53.615  84.283  88.043  0.00  0.00      MON1  
ATOM   3120  O   ARG M 199      53.022  83.753  87.108  0.00  0.00      MON1  
ATOM   3121  N   HSE M 200      54.056  85.556  87.965  0.00  0.00      MON1  
ATOM   3122  HN  HSE M 200      54.628  85.948  88.686  0.00  0.00      MON1  
ATOM   3123  CA  HSE M 200      53.895  86.313  86.745  0.00  0.00      MON1  
ATOM   3124  HA  HSE M 200      52.879  86.216  86.498  0.00  0.00      MON1  
ATOM   3125  CB  HSE M 200      54.290  87.808  86.816  0.00  0.00      MON1  
ATOM   3126  HB1 HSE M 200      55.380  87.918  87.015  0.00  0.00      MON1  
ATOM   3127  HB2 HSE M 200      53.748  88.303  87.647  0.00  0.00      MON1  
ATOM   3128  ND1 HSE M 200      54.834  88.784  84.506  0.00  0.00      MON1  
ATOM   3129  CG  HSE M 200      53.985  88.533  85.519  0.00  0.00      MON1  
ATOM   3130  CE1 HSE M 200      54.199  89.468  83.583  0.00  0.00      MON1  
ATOM   3131  HE1 HSE M 200      54.665  89.819  82.655  0.00  0.00      MON1  
ATOM   3132  NE2 HSE M 200      53.031  89.681  83.931  0.00  0.00      MON1  
ATOM   3133  HE2 HSE M 200      52.467  90.471  83.663  0.00  0.00      MON1  
ATOM   3134  CD2 HSE M 200      52.980  89.241  85.220  0.00  0.00      MON1  
ATOM   3135  HD2 HSE M 200      52.945  90.002  86.023  0.00  0.00      MON1  
ATOM   3136  C   HSE M 200      54.619  85.694  85.596  0.00  0.00      MON1  
ATOM   3137  O   HSE M 200      54.086  85.570  84.498  0.00  0.00      MON1  
ATOM   3138  N   LEU M 201      55.849  85.241  85.857  0.00  0.00      MON1  
ATOM   3139  HN  LEU M 201      56.281  85.424  86.743  0.00  0.00      MON1  
ATOM   3140  CA  LEU M 201      56.655  84.597  84.861  0.00  0.00      MON1  
ATOM   3141  HA  LEU M 201      56.742  85.264  84.013  0.00  0.00      MON1  
ATOM   3142  CB  LEU M 201      58.048  84.323  85.439  0.00  0.00      MON1  
ATOM   3143  HB1 LEU M 201      57.981  83.569  86.250  0.00  0.00      MON1  
ATOM   3144  HB2 LEU M 201      58.391  85.277  85.909  0.00  0.00      MON1  
ATOM   3145  CG  LEU M 201      59.118  83.900  84.422  0.00  0.00      MON1  
ATOM   3146  HG  LEU M 201      59.236  84.725  83.672  0.00  0.00      MON1  
ATOM   3147  CD1 LEU M 201      60.408  83.774  85.166  0.00  0.00      MON1  
ATOM   3148 HD11 LEU M 201      60.299  83.106  86.034  0.00  0.00      MON1  
ATOM   3149 HD12 LEU M 201      60.573  84.795  85.574  0.00  0.00      MON1  
ATOM   3150 HD13 LEU M 201      61.236  83.484  84.507  0.00  0.00      MON1  
ATOM   3151  CD2 LEU M 201      58.815  82.628  83.676  0.00  0.00      MON1  
ATOM   3152 HD21 LEU M 201      58.241  82.947  82.790  0.00  0.00      MON1  
ATOM   3153 HD22 LEU M 201      58.248  81.914  84.308  0.00  0.00      MON1  
ATOM   3154 HD23 LEU M 201      59.727  82.122  83.322  0.00  0.00      MON1  
ATOM   3155  C   LEU M 201      56.007  83.327  84.389  0.00  0.00      MON1  
ATOM   3156  O   LEU M 201      55.914  83.078  83.194  0.00  0.00      MON1  
ATOM   3157  N   VAL M 202      55.475  82.501  85.309  0.00  0.00      MON1  
ATOM   3158  HN  VAL M 202      55.588  82.695  86.285  0.00  0.00      MON1  
ATOM   3159  CA  VAL M 202      54.809  81.270  84.931  0.00  0.00      MON1  
ATOM   3160  HA  VAL M 202      55.507  80.645  84.391  0.00  0.00      MON1  
ATOM   3161  CB  VAL M 202      54.245  80.518  86.118  0.00  0.00      MON1  
ATOM   3162  HB  VAL M 202      53.564  81.176  86.706  0.00  0.00      MON1  
ATOM   3163  CG1 VAL M 202      53.461  79.287  85.616  0.00  0.00      MON1  
ATOM   3164 HG11 VAL M 202      54.097  78.643  84.973  0.00  0.00      MON1  
ATOM   3165 HG12 VAL M 202      52.534  79.544  85.065  0.00  0.00      MON1  
ATOM   3166 HG13 VAL M 202      53.144  78.687  86.495  0.00  0.00      MON1  
ATOM   3167  CG2 VAL M 202      55.386  80.069  87.042  0.00  0.00      MON1  
ATOM   3168 HG21 VAL M 202      56.096  80.871  87.284  0.00  0.00      MON1  
ATOM   3169 HG22 VAL M 202      55.957  79.258  86.541  0.00  0.00      MON1  
ATOM   3170 HG23 VAL M 202      54.973  79.650  87.984  0.00  0.00      MON1  
ATOM   3171  C   VAL M 202      53.653  81.562  84.018  0.00  0.00      MON1  
ATOM   3172  O   VAL M 202      53.444  80.890  83.010  0.00  0.00      MON1  
ATOM   3173  N   LYS M 203      52.879  82.617  84.341  0.00  0.00      MON1  
ATOM   3174  HN  LYS M 203      53.085  83.161  85.155  0.00  0.00      MON1  
ATOM   3175  CA  LYS M 203      51.784  83.029  83.495  0.00  0.00      MON1  
ATOM   3176  HA  LYS M 203      51.086  82.210  83.388  0.00  0.00      MON1  
ATOM   3177  CB  LYS M 203      51.081  84.293  84.010  0.00  0.00      MON1  
ATOM   3178  HB1 LYS M 203      50.355  84.691  83.262  0.00  0.00      MON1  
ATOM   3179  HB2 LYS M 203      51.889  85.024  84.119  0.00  0.00      MON1  
ATOM   3180  CG  LYS M 203      50.335  84.079  85.326  0.00  0.00      MON1  
ATOM   3181  HG1 LYS M 203      50.964  83.467  86.007  0.00  0.00      MON1  
ATOM   3182  HG2 LYS M 203      49.439  83.450  85.102  0.00  0.00      MON1  
ATOM   3183  CD  LYS M 203      49.901  85.356  85.990  0.00  0.00      MON1  
ATOM   3184  HD1 LYS M 203      49.155  85.856  85.341  0.00  0.00      MON1  
ATOM   3185  HD2 LYS M 203      50.931  85.619  86.230  0.00  0.00      MON1  
ATOM   3186  CE  LYS M 203      49.310  85.259  87.348  0.00  0.00      MON1  
ATOM   3187  HE1 LYS M 203      50.233  84.893  87.873  0.00  0.00      MON1  
ATOM   3188  HE2 LYS M 203      48.476  84.519  87.385  0.00  0.00      MON1  
ATOM   3189  NZ  LYS M 203      49.095  86.274  88.267  0.00  0.00      MON1  
ATOM   3190  HZ1 LYS M 203      48.650  87.126  87.851  0.00  0.00      MON1  
ATOM   3191  HZ2 LYS M 203      50.007  86.654  88.627  0.00  0.00      MON1  
ATOM   3192  HZ3 LYS M 203      48.568  85.982  89.114  0.00  0.00      MON1  
ATOM   3193  C   LYS M 203      52.271  83.400  82.130  0.00  0.00      MON1  
ATOM   3194  O   LYS M 203      51.695  82.993  81.127  0.00  0.00      MON1  
ATOM   3195  N   ALA M 204      53.370  84.176  82.070  0.00  0.00      MON1  
ATOM   3196  HN  ALA M 204      53.817  84.505  82.908  0.00  0.00      MON1  
ATOM   3197  CA  ALA M 204      53.956  84.597  80.827  0.00  0.00      MON1  
ATOM   3198  HA  ALA M 204      53.206  85.128  80.263  0.00  0.00      MON1  
ATOM   3199  CB  ALA M 204      55.171  85.513  81.037  0.00  0.00      MON1  
ATOM   3200  HB1 ALA M 204      55.990  84.990  81.576  0.00  0.00      MON1  
ATOM   3201  HB2 ALA M 204      54.880  86.392  81.653  0.00  0.00      MON1  
ATOM   3202  HB3 ALA M 204      55.569  85.884  80.068  0.00  0.00      MON1  
ATOM   3203  C   ALA M 204      54.401  83.413  80.021  0.00  0.00      MON1  
ATOM   3204  O   ALA M 204      54.187  83.329  78.821  0.00  0.00      MON1  
ATOM   3205  N   MET M 205      55.021  82.422  80.671  0.00  0.00      MON1  
ATOM   3206  HN  MET M 205      55.232  82.510  81.650  0.00  0.00      MON1  
ATOM   3207  CA  MET M 205      55.438  81.225  79.986  0.00  0.00      MON1  
ATOM   3208  HA  MET M 205      56.094  81.496  79.171  0.00  0.00      MON1  
ATOM   3209  CB  MET M 205      56.135  80.210  80.906  0.00  0.00      MON1  
ATOM   3210  HB1 MET M 205      56.342  79.275  80.336  0.00  0.00      MON1  
ATOM   3211  HB2 MET M 205      55.457  79.946  81.751  0.00  0.00      MON1  
ATOM   3212  CG  MET M 205      57.447  80.716  81.484  0.00  0.00      MON1  
ATOM   3213  HG1 MET M 205      57.196  81.695  81.891  0.00  0.00      MON1  
ATOM   3214  HG2 MET M 205      58.177  80.873  80.662  0.00  0.00      MON1  
ATOM   3215  SD  MET M 205      58.147  79.623  82.759  0.00  0.00      MON1  
ATOM   3216  CE  MET M 205      58.639  78.339  81.587  0.00  0.00      MON1  
ATOM   3217  HE1 MET M 205      59.212  78.761  80.732  0.00  0.00      MON1  
ATOM   3218  HE2 MET M 205      57.755  77.804  81.182  0.00  0.00      MON1  
ATOM   3219  HE3 MET M 205      59.286  77.583  82.083  0.00  0.00      MON1  
ATOM   3220  C   MET M 205      54.264  80.509  79.403  0.00  0.00      MON1  
ATOM   3221  O   MET M 205      54.313  80.015  78.283  0.00  0.00      MON1  
ATOM   3222  N   ALA M 206      53.161  80.440  80.169  0.00  0.00      MON1  
ATOM   3223  HN  ALA M 206      53.160  80.818  81.099  0.00  0.00      MON1  
ATOM   3224  CA  ALA M 206      51.971  79.784  79.718  0.00  0.00      MON1  
ATOM   3225  HA  ALA M 206      52.214  78.760  79.473  0.00  0.00      MON1  
ATOM   3226  CB  ALA M 206      50.878  79.848  80.790  0.00  0.00      MON1  
ATOM   3227  HB1 ALA M 206      50.654  80.889  81.089  0.00  0.00      MON1  
ATOM   3228  HB2 ALA M 206      51.208  79.304  81.701  0.00  0.00      MON1  
ATOM   3229  HB3 ALA M 206      49.935  79.404  80.416  0.00  0.00      MON1  
ATOM   3230  C   ALA M 206      51.425  80.427  78.483  0.00  0.00      MON1  
ATOM   3231  O   ALA M 206      51.155  79.753  77.495  0.00  0.00      MON1  
ATOM   3232  N   ILE M 207      51.313  81.766  78.474  0.00  0.00      MON1  
ATOM   3233  HN  ILE M 207      51.571  82.313  79.274  0.00  0.00      MON1  
ATOM   3234  CA  ILE M 207      50.804  82.428  77.299  0.00  0.00      MON1  
ATOM   3235  HA  ILE M 207      49.859  81.959  77.061  0.00  0.00      MON1  
ATOM   3236  CB  ILE M 207      50.522  83.907  77.482  0.00  0.00      MON1  
ATOM   3237  HB  ILE M 207      49.928  84.030  78.421  0.00  0.00      MON1  
ATOM   3238  CG2 ILE M 207      51.825  84.706  77.642  0.00  0.00      MON1  
ATOM   3239 HG21 ILE M 207      52.529  84.619  76.796  0.00  0.00      MON1  
ATOM   3240 HG22 ILE M 207      52.286  84.405  78.591  0.00  0.00      MON1  
ATOM   3241 HG23 ILE M 207      51.600  85.786  77.762  0.00  0.00      MON1  
ATOM   3242  CG1 ILE M 207      49.647  84.426  76.320  0.00  0.00      MON1  
ATOM   3243 HG11 ILE M 207      48.701  83.838  76.300  0.00  0.00      MON1  
ATOM   3244 HG12 ILE M 207      50.163  84.256  75.349  0.00  0.00      MON1  
ATOM   3245  CD  ILE M 207      49.306  85.917  76.417  0.00  0.00      MON1  
ATOM   3246  HD1 ILE M 207      50.209  86.547  76.272  0.00  0.00      MON1  
ATOM   3247  HD2 ILE M 207      48.863  86.154  77.408  0.00  0.00      MON1  
ATOM   3248  HD3 ILE M 207      48.570  86.195  75.632  0.00  0.00      MON1  
ATOM   3249  C   ILE M 207      51.703  82.185  76.102  0.00  0.00      MON1  
ATOM   3250  O   ILE M 207      51.191  81.873  75.035  0.00  0.00      MON1  
ATOM   3251  N   THR M 208      53.057  82.249  76.246  0.00  0.00      MON1  
ATOM   3252  HN  THR M 208      53.452  82.450  77.148  0.00  0.00      MON1  
ATOM   3253  CA  THR M 208      54.028  82.037  75.163  0.00  0.00      MON1  
ATOM   3254  HA  THR M 208      53.698  82.648  74.338  0.00  0.00      MON1  
ATOM   3255  CB  THR M 208      55.476  82.474  75.450  0.00  0.00      MON1  
ATOM   3256  HB  THR M 208      56.110  82.262  74.554  0.00  0.00      MON1  
ATOM   3257  OG1 THR M 208      56.046  81.798  76.557  0.00  0.00      MON1  
ATOM   3258  HG1 THR M 208      56.907  82.200  76.690  0.00  0.00      MON1  
ATOM   3259  CG2 THR M 208      55.564  83.981  75.739  0.00  0.00      MON1  
ATOM   3260 HG21 THR M 208      54.994  84.238  76.657  0.00  0.00      MON1  
ATOM   3261 HG22 THR M 208      55.138  84.560  74.893  0.00  0.00      MON1  
ATOM   3262 HG23 THR M 208      56.618  84.295  75.884  0.00  0.00      MON1  
ATOM   3263  C   THR M 208      54.042  80.616  74.635  0.00  0.00      MON1  
ATOM   3264  O   THR M 208      54.027  80.398  73.423  0.00  0.00      MON1  
ATOM   3265  N   TYR M 209      53.997  79.614  75.541  0.00  0.00      MON1  
ATOM   3266  HN  TYR M 209      54.085  79.846  76.518  0.00  0.00      MON1  
ATOM   3267  CA  TYR M 209      53.709  78.224  75.238  0.00  0.00      MON1  
ATOM   3268  HA  TYR M 209      54.540  77.844  74.658  0.00  0.00      MON1  
ATOM   3269  CB  TYR M 209      53.594  77.383  76.552  0.00  0.00      MON1  
ATOM   3270  HB1 TYR M 209      52.818  77.820  77.215  0.00  0.00      MON1  
ATOM   3271  HB2 TYR M 209      54.561  77.435  77.094  0.00  0.00      MON1  
ATOM   3272  CG  TYR M 209      53.249  75.925  76.315  0.00  0.00      MON1  
ATOM   3273  CD1 TYR M 209      51.907  75.497  76.256  0.00  0.00      MON1  
ATOM   3274  HD1 TYR M 209      51.110  76.204  76.428  0.00  0.00      MON1  
ATOM   3275  CE1 TYR M 209      51.594  74.172  75.912  0.00  0.00      MON1  
ATOM   3276  HE1 TYR M 209      50.563  73.863  75.823  0.00  0.00      MON1  
ATOM   3277  CZ  TYR M 209      52.621  73.252  75.666  0.00  0.00      MON1  
ATOM   3278  OH  TYR M 209      52.314  71.933  75.275  0.00  0.00      MON1  
ATOM   3279  HH  TYR M 209      53.079  71.616  74.781  0.00  0.00      MON1  
ATOM   3280  CD2 TYR M 209      54.271  74.979  76.116  0.00  0.00      MON1  
ATOM   3281  HD2 TYR M 209      55.305  75.290  76.163  0.00  0.00      MON1  
ATOM   3282  CE2 TYR M 209      53.959  73.649  75.797  0.00  0.00      MON1  
ATOM   3283  HE2 TYR M 209      54.757  72.943  75.620  0.00  0.00      MON1  
ATOM   3284  C   TYR M 209      52.471  78.090  74.355  0.00  0.00      MON1  
ATOM   3285  O   TYR M 209      52.564  77.668  73.207  0.00  0.00      MON1  
ATOM   3286  N   TYR M 210      51.281  78.502  74.841  0.00  0.00      MON1  
ATOM   3287  HN  TYR M 210      51.217  78.925  75.750  0.00  0.00      MON1  
ATOM   3288  CA  TYR M 210      50.047  78.246  74.123  0.00  0.00      MON1  
ATOM   3289  HA  TYR M 210      49.998  77.183  73.917  0.00  0.00      MON1  
ATOM   3290  CB  TYR M 210      48.797  78.715  74.887  0.00  0.00      MON1  
ATOM   3291  HB1 TYR M 210      47.885  78.795  74.254  0.00  0.00      MON1  
ATOM   3292  HB2 TYR M 210      48.978  79.704  75.366  0.00  0.00      MON1  
ATOM   3293  CG  TYR M 210      48.505  77.701  75.910  0.00  0.00      MON1  
ATOM   3294  CD1 TYR M 210      47.881  76.506  75.531  0.00  0.00      MON1  
ATOM   3295  HD1 TYR M 210      47.638  76.331  74.492  0.00  0.00      MON1  
ATOM   3296  CE1 TYR M 210      47.623  75.523  76.482  0.00  0.00      MON1  
ATOM   3297  HE1 TYR M 210      47.224  74.566  76.178  0.00  0.00      MON1  
ATOM   3298  CZ  TYR M 210      48.001  75.757  77.794  0.00  0.00      MON1  
ATOM   3299  OH  TYR M 210      48.011  74.714  78.680  0.00  0.00      MON1  
ATOM   3300  HH  TYR M 210      47.744  73.920  78.207  0.00  0.00      MON1  
ATOM   3301  CD2 TYR M 210      48.780  77.948  77.250  0.00  0.00      MON1  
ATOM   3302  HD2 TYR M 210      49.078  78.928  77.569  0.00  0.00      MON1  
ATOM   3303  CE2 TYR M 210      48.504  76.980  78.195  0.00  0.00      MON1  
ATOM   3304  HE2 TYR M 210      48.573  77.237  79.228  0.00  0.00      MON1  
ATOM   3305  C   TYR M 210      49.946  78.899  72.797  0.00  0.00      MON1  
ATOM   3306  O   TYR M 210      49.573  78.261  71.817  0.00  0.00      MON1  
ATOM   3307  N   VAL M 211      50.280  80.196  72.726  0.00  0.00      MON1  
ATOM   3308  HN  VAL M 211      50.592  80.711  73.530  0.00  0.00      MON1  
ATOM   3309  CA  VAL M 211      50.187  80.898  71.472  0.00  0.00      MON1  
ATOM   3310  HA  VAL M 211      49.186  80.759  71.086  0.00  0.00      MON1  
ATOM   3311  CB  VAL M 211      50.430  82.389  71.602  0.00  0.00      MON1  
ATOM   3312  HB  VAL M 211      50.329  82.874  70.601  0.00  0.00      MON1  
ATOM   3313  CG1 VAL M 211      49.335  83.002  72.498  0.00  0.00      MON1  
ATOM   3314 HG11 VAL M 211      49.370  82.585  73.525  0.00  0.00      MON1  
ATOM   3315 HG12 VAL M 211      48.328  82.803  72.074  0.00  0.00      MON1  
ATOM   3316 HG13 VAL M 211      49.473  84.102  72.572  0.00  0.00      MON1  
ATOM   3317  CG2 VAL M 211      51.848  82.665  72.131  0.00  0.00      MON1  
ATOM   3318 HG21 VAL M 211      52.591  82.579  71.311  0.00  0.00      MON1  
ATOM   3319 HG22 VAL M 211      52.141  81.967  72.932  0.00  0.00      MON1  
ATOM   3320 HG23 VAL M 211      51.909  83.700  72.529  0.00  0.00      MON1  
ATOM   3321  C   VAL M 211      51.122  80.276  70.459  0.00  0.00      MON1  
ATOM   3322  O   VAL M 211      50.692  79.946  69.366  0.00  0.00      MON1  
ATOM   3323  N   GLY M 212      52.392  79.966  70.822  0.00  0.00      MON1  
ATOM   3324  HN  GLY M 212      52.688  80.140  71.765  0.00  0.00      MON1  
ATOM   3325  CA  GLY M 212      53.386  79.409  69.905  0.00  0.00      MON1  
ATOM   3326  HA1 GLY M 212      54.321  79.346  70.442  0.00  0.00      MON1  
ATOM   3327  HA2 GLY M 212      53.443  80.044  69.033  0.00  0.00      MON1  
ATOM   3328  C   GLY M 212      53.050  78.021  69.425  0.00  0.00      MON1  
ATOM   3329  O   GLY M 212      52.956  77.766  68.228  0.00  0.00      MON1  
ATOM   3330  N   TRP M 213      52.778  77.112  70.375  0.00  0.00      MON1  
ATOM   3331  HN  TRP M 213      52.786  77.392  71.340  0.00  0.00      MON1  
ATOM   3332  CA  TRP M 213      52.360  75.739  70.160  0.00  0.00      MON1  
ATOM   3333  HA  TRP M 213      53.116  75.250  69.566  0.00  0.00      MON1  
ATOM   3334  CB  TRP M 213      52.320  75.005  71.513  0.00  0.00      MON1  
ATOM   3335  HB1 TRP M 213      51.876  74.004  71.347  0.00  0.00      MON1  
ATOM   3336  HB2 TRP M 213      51.669  75.543  72.235  0.00  0.00      MON1  
ATOM   3337  CG  TRP M 213      53.683  74.811  72.111  0.00  0.00      MON1  
ATOM   3338  CD1 TRP M 213      54.656  75.738  72.405  0.00  0.00      MON1  
ATOM   3339  HD1 TRP M 213      54.562  76.807  72.286  0.00  0.00      MON1  
ATOM   3340  NE1 TRP M 213      55.758  75.115  72.919  0.00  0.00      MON1  
ATOM   3341  HE1 TRP M 213      56.387  75.533  73.561  0.00  0.00      MON1  
ATOM   3342  CE2 TRP M 213      55.545  73.780  72.940  0.00  0.00      MON1  
ATOM   3343  CD2 TRP M 213      54.238  73.538  72.450  0.00  0.00      MON1  
ATOM   3344  CE3 TRP M 213      53.749  72.235  72.385  0.00  0.00      MON1  
ATOM   3345  HE3 TRP M 213      52.767  72.013  72.002  0.00  0.00      MON1  
ATOM   3346  CZ3 TRP M 213      54.587  71.205  72.791  0.00  0.00      MON1  
ATOM   3347  HZ3 TRP M 213      54.265  70.178  72.691  0.00  0.00      MON1  
ATOM   3348  CZ2 TRP M 213      56.377  72.757  73.329  0.00  0.00      MON1  
ATOM   3349  HZ2 TRP M 213      57.391  72.929  73.650  0.00  0.00      MON1  
ATOM   3350  CH2 TRP M 213      55.879  71.464  73.235  0.00  0.00      MON1  
ATOM   3351  HH2 TRP M 213      56.545  70.632  73.417  0.00  0.00      MON1  
ATOM   3352  C   TRP M 213      51.058  75.618  69.372  0.00  0.00      MON1  
ATOM   3353  O   TRP M 213      50.938  74.788  68.475  0.00  0.00      MON1  
ATOM   3354  N   SER M 214      50.070  76.498  69.642  0.00  0.00      MON1  
ATOM   3355  HN  SER M 214      50.164  77.157  70.396  0.00  0.00      MON1  
ATOM   3356  CA  SER M 214      48.842  76.599  68.863  0.00  0.00      MON1  
ATOM   3357  HA  SER M 214      48.439  75.603  68.751  0.00  0.00      MON1  
ATOM   3358  CB  SER M 214      47.752  77.456  69.563  0.00  0.00      MON1  
ATOM   3359  HB1 SER M 214      48.076  78.520  69.622  0.00  0.00      MON1  
ATOM   3360  HB2 SER M 214      47.631  77.082  70.605  0.00  0.00      MON1  
ATOM   3361  OG  SER M 214      46.484  77.357  68.906  0.00  0.00      MON1  
ATOM   3362  HG1 SER M 214      46.655  77.492  67.962  0.00  0.00      MON1  
ATOM   3363  C   SER M 214      49.034  77.156  67.452  0.00  0.00      MON1  
ATOM   3364  O   SER M 214      48.182  76.920  66.598  0.00  0.00      MON1  
ATOM   3365  N   PHE M 215      50.120  77.899  67.141  0.00  0.00      MON1  
ATOM   3366  HN  PHE M 215      50.784  78.176  67.839  0.00  0.00      MON1  
ATOM   3367  CA  PHE M 215      50.360  78.347  65.778  0.00  0.00      MON1  
ATOM   3368  HA  PHE M 215      49.406  78.644  65.363  0.00  0.00      MON1  
ATOM   3369  CB  PHE M 215      51.344  79.538  65.670  0.00  0.00      MON1  
ATOM   3370  HB1 PHE M 215      51.727  79.683  64.638  0.00  0.00      MON1  
ATOM   3371  HB2 PHE M 215      52.209  79.394  66.351  0.00  0.00      MON1  
ATOM   3372  CG  PHE M 215      50.616  80.792  66.014  0.00  0.00      MON1  
ATOM   3373  CD1 PHE M 215      49.580  81.247  65.188  0.00  0.00      MON1  
ATOM   3374  HD1 PHE M 215      49.311  80.686  64.305  0.00  0.00      MON1  
ATOM   3375  CE1 PHE M 215      48.879  82.412  65.508  0.00  0.00      MON1  
ATOM   3376  HE1 PHE M 215      48.069  82.748  64.877  0.00  0.00      MON1  
ATOM   3377  CZ  PHE M 215      49.215  83.131  66.658  0.00  0.00      MON1  
ATOM   3378  HZ  PHE M 215      48.656  84.017  66.920  0.00  0.00      MON1  
ATOM   3379  CD2 PHE M 215      50.981  81.553  67.124  0.00  0.00      MON1  
ATOM   3380  HD2 PHE M 215      51.825  81.247  67.723  0.00  0.00      MON1  
ATOM   3381  CE2 PHE M 215      50.270  82.703  67.467  0.00  0.00      MON1  
ATOM   3382  HE2 PHE M 215      50.550  83.274  68.340  0.00  0.00      MON1  
ATOM   3383  C   PHE M 215      50.838  77.272  64.838  0.00  0.00      MON1  
ATOM   3384  O   PHE M 215      50.508  77.309  63.658  0.00  0.00      MON1  
ATOM   3385  N   PHE M 216      51.620  76.281  65.301  0.00  0.00      MON1  
ATOM   3386  HN  PHE M 216      51.913  76.280  66.257  0.00  0.00      MON1  
ATOM   3387  CA  PHE M 216      52.141  75.216  64.450  0.00  0.00      MON1  
ATOM   3388  HA  PHE M 216      52.689  75.711  63.659  0.00  0.00      MON1  
ATOM   3389  CB  PHE M 216      53.173  74.351  65.198  0.00  0.00      MON1  
ATOM   3390  HB1 PHE M 216      53.517  73.499  64.573  0.00  0.00      MON1  
ATOM   3391  HB2 PHE M 216      52.724  73.952  66.133  0.00  0.00      MON1  
ATOM   3392  CG  PHE M 216      54.396  75.169  65.540  0.00  0.00      MON1  
ATOM   3393  CD1 PHE M 216      55.333  75.510  64.549  0.00  0.00      MON1  
ATOM   3394  HD1 PHE M 216      55.166  75.211  63.526  0.00  0.00      MON1  
ATOM   3395  CE1 PHE M 216      56.504  76.207  64.878  0.00  0.00      MON1  
ATOM   3396  HE1 PHE M 216      57.229  76.449  64.113  0.00  0.00      MON1  
ATOM   3397  CZ  PHE M 216      56.747  76.578  66.204  0.00  0.00      MON1  
ATOM   3398  HZ  PHE M 216      57.659  77.101  66.451  0.00  0.00      MON1  
ATOM   3399  CD2 PHE M 216      54.657  75.548  66.866  0.00  0.00      MON1  
ATOM   3400  HD2 PHE M 216      53.957  75.271  67.637  0.00  0.00      MON1  
ATOM   3401  CE2 PHE M 216      55.819  76.257  67.201  0.00  0.00      MON1  
ATOM   3402  HE2 PHE M 216      56.006  76.534  68.228  0.00  0.00      MON1  
ATOM   3403  C   PHE M 216      51.080  74.364  63.705  0.00  0.00      MON1  
ATOM   3404  O   PHE M 216      51.266  74.198  62.492  0.00  0.00      MON1  
ATOM   3405  N   PRO M 217      49.936  73.894  64.278  0.00  0.00      MON1  
ATOM   3406  CD  PRO M 217      49.695  73.787  65.718  0.00  0.00      MON1  
ATOM   3407  HD1 PRO M 217      49.970  74.708  66.263  0.00  0.00      MON1  
ATOM   3408  HD2 PRO M 217      50.275  72.929  66.119  0.00  0.00      MON1  
ATOM   3409  CA  PRO M 217      48.851  73.248  63.527  0.00  0.00      MON1  
ATOM   3410  HA  PRO M 217      49.262  72.436  62.946  0.00  0.00      MON1  
ATOM   3411  CB  PRO M 217      47.843  72.761  64.585  0.00  0.00      MON1  
ATOM   3412  HB1 PRO M 217      48.011  71.681  64.755  0.00  0.00      MON1  
ATOM   3413  HB2 PRO M 217      46.777  72.886  64.299  0.00  0.00      MON1  
ATOM   3414  CG  PRO M 217      48.189  73.549  65.850  0.00  0.00      MON1  
ATOM   3415  HG1 PRO M 217      47.660  74.527  65.836  0.00  0.00      MON1  
ATOM   3416  HG2 PRO M 217      47.927  73.009  66.782  0.00  0.00      MON1  
ATOM   3417  C   PRO M 217      48.155  74.182  62.553  0.00  0.00      MON1  
ATOM   3418  O   PRO M 217      47.716  73.719  61.498  0.00  0.00      MON1  
ATOM   3419  N   LEU M 218      47.999  75.476  62.891  0.00  0.00      MON1  
ATOM   3420  HN  LEU M 218      48.316  75.800  63.780  0.00  0.00      MON1  
ATOM   3421  CA  LEU M 218      47.455  76.477  61.994  0.00  0.00      MON1  
ATOM   3422  HA  LEU M 218      46.519  76.106  61.604  0.00  0.00      MON1  
ATOM   3423  CB  LEU M 218      47.188  77.784  62.772  0.00  0.00      MON1  
ATOM   3424  HB1 LEU M 218      46.829  78.566  62.064  0.00  0.00      MON1  
ATOM   3425  HB2 LEU M 218      48.142  78.144  63.216  0.00  0.00      MON1  
ATOM   3426  CG  LEU M 218      46.151  77.662  63.903  0.00  0.00      MON1  
ATOM   3427  HG  LEU M 218      46.441  76.863  64.625  0.00  0.00      MON1  
ATOM   3428  CD1 LEU M 218      46.176  78.995  64.633  0.00  0.00      MON1  
ATOM   3429 HD11 LEU M 218      46.639  79.791  64.011  0.00  0.00      MON1  
ATOM   3430 HD12 LEU M 218      46.737  78.940  65.589  0.00  0.00      MON1  
ATOM   3431 HD13 LEU M 218      45.141  79.285  64.776  0.00  0.00      MON1  
ATOM   3432  CD2 LEU M 218      44.758  77.322  63.336  0.00  0.00      MON1  
ATOM   3433 HD21 LEU M 218      44.718  76.249  63.050  0.00  0.00      MON1  
ATOM   3434 HD22 LEU M 218      44.594  77.915  62.411  0.00  0.00      MON1  
ATOM   3435 HD23 LEU M 218      43.914  77.526  64.012  0.00  0.00      MON1  
ATOM   3436  C   LEU M 218      48.359  76.727  60.787  0.00  0.00      MON1  
ATOM   3437  O   LEU M 218      47.951  76.523  59.647  0.00  0.00      MON1  
ATOM   3438  N   ILE M 219      49.651  77.054  61.017  0.00  0.00      MON1  
ATOM   3439  HN  ILE M 219      49.959  77.171  61.968  0.00  0.00      MON1  
ATOM   3440  CA  ILE M 219      50.691  77.235  60.003  0.00  0.00      MON1  
ATOM   3441  HA  ILE M 219      50.352  78.011  59.333  0.00  0.00      MON1  
ATOM   3442  CB  ILE M 219      52.013  77.731  60.635  0.00  0.00      MON1  
ATOM   3443  HB  ILE M 219      52.261  77.051  61.483  0.00  0.00      MON1  
ATOM   3444  CG2 ILE M 219      53.196  77.689  59.637  0.00  0.00      MON1  
ATOM   3445 HG21 ILE M 219      52.996  78.345  58.763  0.00  0.00      MON1  
ATOM   3446 HG22 ILE M 219      53.375  76.658  59.268  0.00  0.00      MON1  
ATOM   3447 HG23 ILE M 219      54.147  78.011  60.104  0.00  0.00      MON1  
ATOM   3448  CG1 ILE M 219      51.856  79.167  61.211  0.00  0.00      MON1  
ATOM   3449 HG11 ILE M 219      50.978  79.209  61.891  0.00  0.00      MON1  
ATOM   3450 HG12 ILE M 219      51.654  79.856  60.360  0.00  0.00      MON1  
ATOM   3451  CD  ILE M 219      53.091  79.668  61.975  0.00  0.00      MON1  
ATOM   3452  HD1 ILE M 219      54.031  79.560  61.409  0.00  0.00      MON1  
ATOM   3453  HD2 ILE M 219      53.215  79.070  62.904  0.00  0.00      MON1  
ATOM   3454  HD3 ILE M 219      52.964  80.730  62.276  0.00  0.00      MON1  
ATOM   3455  C   ILE M 219      50.845  75.985  59.127  0.00  0.00      MON1  
ATOM   3456  O   ILE M 219      50.944  76.103  57.909  0.00  0.00      MON1  
ATOM   3457  N   PHE M 220      50.764  74.756  59.699  0.00  0.00      MON1  
ATOM   3458  HN  PHE M 220      50.713  74.667  60.695  0.00  0.00      MON1  
ATOM   3459  CA  PHE M 220      50.710  73.510  58.938  0.00  0.00      MON1  
ATOM   3460  HA  PHE M 220      51.625  73.439  58.366  0.00  0.00      MON1  
ATOM   3461  CB  PHE M 220      50.644  72.298  59.914  0.00  0.00      MON1  
ATOM   3462  HB1 PHE M 220      49.784  72.403  60.605  0.00  0.00      MON1  
ATOM   3463  HB2 PHE M 220      51.573  72.300  60.524  0.00  0.00      MON1  
ATOM   3464  CG  PHE M 220      50.523  70.960  59.221  0.00  0.00      MON1  
ATOM   3465  CD1 PHE M 220      49.281  70.478  58.767  0.00  0.00      MON1  
ATOM   3466  HD1 PHE M 220      48.390  71.068  58.918  0.00  0.00      MON1  
ATOM   3467  CE1 PHE M 220      49.185  69.250  58.103  0.00  0.00      MON1  
ATOM   3468  HE1 PHE M 220      48.226  68.899  57.751  0.00  0.00      MON1  
ATOM   3469  CZ  PHE M 220      50.329  68.468  57.929  0.00  0.00      MON1  
ATOM   3470  HZ  PHE M 220      50.261  67.513  57.435  0.00  0.00      MON1  
ATOM   3471  CD2 PHE M 220      51.659  70.160  59.048  0.00  0.00      MON1  
ATOM   3472  HD2 PHE M 220      52.619  70.505  59.403  0.00  0.00      MON1  
ATOM   3473  CE2 PHE M 220      51.561  68.919  58.415  0.00  0.00      MON1  
ATOM   3474  HE2 PHE M 220      52.443  68.310  58.322  0.00  0.00      MON1  
ATOM   3475  C   PHE M 220      49.575  73.465  57.922  0.00  0.00      MON1  
ATOM   3476  O   PHE M 220      49.811  73.225  56.737  0.00  0.00      MON1  
ATOM   3477  N   LEU M 221      48.317  73.742  58.345  0.00  0.00      MON1  
ATOM   3478  HN  LEU M 221      48.128  73.973  59.300  0.00  0.00      MON1  
ATOM   3479  CA  LEU M 221      47.202  73.804  57.417  0.00  0.00      MON1  
ATOM   3480  HA  LEU M 221      47.276  72.901  56.827  0.00  0.00      MON1  
ATOM   3481  CB  LEU M 221      45.799  73.685  58.090  0.00  0.00      MON1  
ATOM   3482  HB1 LEU M 221      45.826  72.756  58.705  0.00  0.00      MON1  
ATOM   3483  HB2 LEU M 221      45.057  73.515  57.283  0.00  0.00      MON1  
ATOM   3484  CG  LEU M 221      45.223  74.805  58.992  0.00  0.00      MON1  
ATOM   3485  HG  LEU M 221      45.934  74.985  59.828  0.00  0.00      MON1  
ATOM   3486  CD1 LEU M 221      44.930  76.131  58.273  0.00  0.00      MON1  
ATOM   3487 HD11 LEU M 221      44.379  75.951  57.326  0.00  0.00      MON1  
ATOM   3488 HD12 LEU M 221      45.854  76.696  58.056  0.00  0.00      MON1  
ATOM   3489 HD13 LEU M 221      44.304  76.783  58.920  0.00  0.00      MON1  
ATOM   3490  CD2 LEU M 221      43.888  74.332  59.597  0.00  0.00      MON1  
ATOM   3491 HD21 LEU M 221      44.016  73.373  60.138  0.00  0.00      MON1  
ATOM   3492 HD22 LEU M 221      43.133  74.184  58.797  0.00  0.00      MON1  
ATOM   3493 HD23 LEU M 221      43.497  75.086  60.313  0.00  0.00      MON1  
ATOM   3494  C   LEU M 221      47.366  74.928  56.391  0.00  0.00      MON1  
ATOM   3495  O   LEU M 221      47.088  74.752  55.212  0.00  0.00      MON1  
ATOM   3496  N   PHE M 222      47.889  76.110  56.763  0.00  0.00      MON1  
ATOM   3497  HN  PHE M 222      48.090  76.284  57.730  0.00  0.00      MON1  
ATOM   3498  CA  PHE M 222      48.130  77.182  55.810  0.00  0.00      MON1  
ATOM   3499  HA  PHE M 222      47.208  77.376  55.278  0.00  0.00      MON1  
ATOM   3500  CB  PHE M 222      48.659  78.491  56.447  0.00  0.00      MON1  
ATOM   3501  HB1 PHE M 222      49.136  79.163  55.712  0.00  0.00      MON1  
ATOM   3502  HB2 PHE M 222      49.405  78.260  57.237  0.00  0.00      MON1  
ATOM   3503  CG  PHE M 222      47.572  79.322  57.009  0.00  0.00      MON1  
ATOM   3504  CD1 PHE M 222      46.820  80.149  56.168  0.00  0.00      MON1  
ATOM   3505  HD1 PHE M 222      47.021  80.138  55.113  0.00  0.00      MON1  
ATOM   3506  CE1 PHE M 222      45.826  80.975  56.695  0.00  0.00      MON1  
ATOM   3507  HE1 PHE M 222      45.247  81.621  56.059  0.00  0.00      MON1  
ATOM   3508  CZ  PHE M 222      45.575  80.974  58.068  0.00  0.00      MON1  
ATOM   3509  HZ  PHE M 222      44.799  81.607  58.477  0.00  0.00      MON1  
ATOM   3510  CD2 PHE M 222      47.342  79.360  58.382  0.00  0.00      MON1  
ATOM   3511  HD2 PHE M 222      47.970  78.792  59.043  0.00  0.00      MON1  
ATOM   3512  CE2 PHE M 222      46.335  80.164  58.914  0.00  0.00      MON1  
ATOM   3513  HE2 PHE M 222      46.156  80.176  59.980  0.00  0.00      MON1  
ATOM   3514  C   PHE M 222      49.134  76.795  54.765  0.00  0.00      MON1  
ATOM   3515  O   PHE M 222      49.016  77.191  53.609  0.00  0.00      MON1  
ATOM   3516  N   GLY M 223      50.170  76.070  55.199  0.00  0.00      MON1  
ATOM   3517  HN  GLY M 223      50.176  75.815  56.169  0.00  0.00      MON1  
ATOM   3518  CA  GLY M 223      51.341  75.671  54.458  0.00  0.00      MON1  
ATOM   3519  HA1 GLY M 223      51.828  74.973  55.119  0.00  0.00      MON1  
ATOM   3520  HA2 GLY M 223      52.006  76.456  54.243  0.00  0.00      MON1  
ATOM   3521  C   GLY M 223      51.127  74.879  53.243  0.00  0.00      MON1  
ATOM   3522  O   GLY M 223      50.027  74.438  52.930  0.00  0.00      MON1  
ATOM   3523  N   GLN M 224      52.249  74.571  52.580  0.00  0.00      MON1  
ATOM   3524  HN  GLN M 224      53.098  75.025  52.873  0.00  0.00      MON1  
ATOM   3525  CA  GLN M 224      52.321  73.697  51.435  0.00  0.00      MON1  
ATOM   3526  HA  GLN M 224      51.704  74.117  50.660  0.00  0.00      MON1  
ATOM   3527  CB  GLN M 224      53.788  73.579  50.994  0.00  0.00      MON1  
ATOM   3528  HB1 GLN M 224      54.354  73.150  51.854  0.00  0.00      MON1  
ATOM   3529  HB2 GLN M 224      54.170  74.620  50.852  0.00  0.00      MON1  
ATOM   3530  CG  GLN M 224      54.033  72.781  49.700  0.00  0.00      MON1  
ATOM   3531  HG1 GLN M 224      53.584  73.351  48.861  0.00  0.00      MON1  
ATOM   3532  HG2 GLN M 224      53.664  71.738  49.752  0.00  0.00      MON1  
ATOM   3533  CD  GLN M 224      55.517  72.747  49.365  0.00  0.00      MON1  
ATOM   3534  OE1 GLN M 224      55.893  72.780  48.195  0.00  0.00      MON1  
ATOM   3535  NE2 GLN M 224      56.377  72.686  50.402  0.00  0.00      MON1  
ATOM   3536 HE21 GLN M 224      56.046  72.561  51.333  0.00  0.00      MON1  
ATOM   3537 HE22 GLN M 224      57.348  72.628  50.186  0.00  0.00      MON1  
ATOM   3538  C   GLN M 224      51.804  72.313  51.749  0.00  0.00      MON1  
ATOM   3539  O   GLN M 224      51.134  71.693  50.922  0.00  0.00      MON1  
ATOM   3540  N   SER M 225      52.121  71.820  52.963  0.00  0.00      MON1  
ATOM   3541  HN  SER M 225      52.677  72.364  53.593  0.00  0.00      MON1  
ATOM   3542  CA  SER M 225      51.600  70.605  53.558  0.00  0.00      MON1  
ATOM   3543  HA  SER M 225      51.840  69.786  52.897  0.00  0.00      MON1  
ATOM   3544  CB  SER M 225      52.256  70.321  54.935  0.00  0.00      MON1  
ATOM   3545  HB1 SER M 225      53.325  70.060  54.760  0.00  0.00      MON1  
ATOM   3546  HB2 SER M 225      51.783  69.457  55.452  0.00  0.00      MON1  
ATOM   3547  OG  SER M 225      52.224  71.479  55.769  0.00  0.00      MON1  
ATOM   3548  HG1 SER M 225      51.333  71.588  56.135  0.00  0.00      MON1  
ATOM   3549  C   SER M 225      50.087  70.627  53.703  0.00  0.00      MON1  
ATOM   3550  O   SER M 225      49.460  69.570  53.707  0.00  0.00      MON1  
ATOM   3551  N   GLY M 226      49.452  71.809  53.772  0.00  0.00      MON1  
ATOM   3552  HN  GLY M 226      49.960  72.673  53.722  0.00  0.00      MON1  
ATOM   3553  CA  GLY M 226      48.019  71.942  53.902  0.00  0.00      MON1  
ATOM   3554  HA1 GLY M 226      47.861  72.665  54.675  0.00  0.00      MON1  
ATOM   3555  HA2 GLY M 226      47.559  70.994  54.139  0.00  0.00      MON1  
ATOM   3556  C   GLY M 226      47.398  72.427  52.629  0.00  0.00      MON1  
ATOM   3557  O   GLY M 226      47.487  71.799  51.570  0.00  0.00      MON1  
ATOM   3558  N   PHE M 227      46.714  73.571  52.739  0.00  0.00      MON1  
ATOM   3559  HN  PHE M 227      46.703  74.042  53.628  0.00  0.00      MON1  
ATOM   3560  CA  PHE M 227      45.983  74.226  51.682  0.00  0.00      MON1  
ATOM   3561  HA  PHE M 227      45.463  73.468  51.110  0.00  0.00      MON1  
ATOM   3562  CB  PHE M 227      44.967  75.237  52.260  0.00  0.00      MON1  
ATOM   3563  HB1 PHE M 227      44.436  75.809  51.468  0.00  0.00      MON1  
ATOM   3564  HB2 PHE M 227      45.445  75.943  52.972  0.00  0.00      MON1  
ATOM   3565  CG  PHE M 227      43.994  74.380  52.976  0.00  0.00      MON1  
ATOM   3566  CD1 PHE M 227      44.177  74.049  54.325  0.00  0.00      MON1  
ATOM   3567  HD1 PHE M 227      44.907  74.566  54.907  0.00  0.00      MON1  
ATOM   3568  CE1 PHE M 227      43.373  73.112  54.948  0.00  0.00      MON1  
ATOM   3569  HE1 PHE M 227      43.550  72.804  55.968  0.00  0.00      MON1  
ATOM   3570  CZ  PHE M 227      42.398  72.499  54.195  0.00  0.00      MON1  
ATOM   3571  HZ  PHE M 227      42.204  71.507  54.510  0.00  0.00      MON1  
ATOM   3572  CD2 PHE M 227      42.946  73.809  52.261  0.00  0.00      MON1  
ATOM   3573  HD2 PHE M 227      42.815  74.039  51.212  0.00  0.00      MON1  
ATOM   3574  CE2 PHE M 227      42.173  72.844  52.863  0.00  0.00      MON1  
ATOM   3575  HE2 PHE M 227      41.554  72.249  52.210  0.00  0.00      MON1  
ATOM   3576  C   PHE M 227      46.892  74.897  50.703  0.00  0.00      MON1  
ATOM   3577  O   PHE M 227      46.511  75.078  49.551  0.00  0.00      MON1  
ATOM   3578  N   LYS M 228      48.125  75.239  51.122  0.00  0.00      MON1  
ATOM   3579  HN  LYS M 228      48.437  75.010  52.049  0.00  0.00      MON1  
ATOM   3580  CA  LYS M 228      49.128  75.845  50.272  0.00  0.00      MON1  
ATOM   3581  HA  LYS M 228      50.065  75.819  50.806  0.00  0.00      MON1  
ATOM   3582  CB  LYS M 228      49.271  75.095  48.931  0.00  0.00      MON1  
ATOM   3583  HB1 LYS M 228      48.446  75.341  48.226  0.00  0.00      MON1  
ATOM   3584  HB2 LYS M 228      49.174  74.024  49.213  0.00  0.00      MON1  
ATOM   3585  CG  LYS M 228      50.601  75.323  48.210  0.00  0.00      MON1  
ATOM   3586  HG1 LYS M 228      51.450  75.187  48.911  0.00  0.00      MON1  
ATOM   3587  HG2 LYS M 228      50.661  76.379  47.854  0.00  0.00      MON1  
ATOM   3588  CD  LYS M 228      50.767  74.399  46.996  0.00  0.00      MON1  
ATOM   3589  HD1 LYS M 228      51.768  74.553  46.533  0.00  0.00      MON1  
ATOM   3590  HD2 LYS M 228      50.008  74.719  46.242  0.00  0.00      MON1  
ATOM   3591  CE  LYS M 228      50.502  72.906  47.231  0.00  0.00      MON1  
ATOM   3592  HE1 LYS M 228      50.525  72.402  46.234  0.00  0.00      MON1  
ATOM   3593  HE2 LYS M 228      49.512  72.693  47.680  0.00  0.00      MON1  
ATOM   3594  NZ  LYS M 228      51.552  72.281  48.043  0.00  0.00      MON1  
ATOM   3595  HZ1 LYS M 228      51.453  72.539  49.048  0.00  0.00      MON1  
ATOM   3596  HZ2 LYS M 228      52.481  72.575  47.665  0.00  0.00      MON1  
ATOM   3597  HZ3 LYS M 228      51.483  71.244  47.964  0.00  0.00      MON1  
ATOM   3598  C   LYS M 228      48.800  77.291  50.044  0.00  0.00      MON1  
ATOM   3599  O   LYS M 228      49.061  77.861  48.988  0.00  0.00      MON1  
ATOM   3600  N   LYS M 229      48.203  77.941  51.054  0.00  0.00      MON1  
ATOM   3601  HN  LYS M 229      48.061  77.466  51.923  0.00  0.00      MON1  
ATOM   3602  CA  LYS M 229      47.999  79.368  51.033  0.00  0.00      MON1  
ATOM   3603  HA  LYS M 229      47.518  79.646  50.106  0.00  0.00      MON1  
ATOM   3604  CB  LYS M 229      47.171  79.813  52.253  0.00  0.00      MON1  
ATOM   3605  HB1 LYS M 229      47.780  79.787  53.180  0.00  0.00      MON1  
ATOM   3606  HB2 LYS M 229      46.361  79.055  52.376  0.00  0.00      MON1  
ATOM   3607  CG  LYS M 229      46.494  81.176  52.054  0.00  0.00      MON1  
ATOM   3608  HG1 LYS M 229      45.953  81.122  51.079  0.00  0.00      MON1  
ATOM   3609  HG2 LYS M 229      47.260  81.978  51.977  0.00  0.00      MON1  
ATOM   3610  CD  LYS M 229      45.469  81.464  53.155  0.00  0.00      MON1  
ATOM   3611  HD1 LYS M 229      46.000  81.803  54.067  0.00  0.00      MON1  
ATOM   3612  HD2 LYS M 229      44.947  80.506  53.398  0.00  0.00      MON1  
ATOM   3613  CE  LYS M 229      44.385  82.459  52.749  0.00  0.00      MON1  
ATOM   3614  HE1 LYS M 229      43.568  82.441  53.477  0.00  0.00      MON1  
ATOM   3615  HE2 LYS M 229      43.985  82.205  51.743  0.00  0.00      MON1  
ATOM   3616  NZ  LYS M 229      44.912  83.835  52.709  0.00  0.00      MON1  
ATOM   3617  HZ1 LYS M 229      45.718  83.850  52.053  0.00  0.00      MON1  
ATOM   3618  HZ2 LYS M 229      45.218  84.114  53.663  0.00  0.00      MON1  
ATOM   3619  HZ3 LYS M 229      44.169  84.480  52.370  0.00  0.00      MON1  
ATOM   3620  C   LYS M 229      49.342  80.046  51.097  0.00  0.00      MON1  
ATOM   3621  O   LYS M 229      49.608  81.031  50.421  0.00  0.00      MON1  
ATOM   3622  N   ILE M 230      50.232  79.495  51.922  0.00  0.00      MON1  
ATOM   3623  HN  ILE M 230      50.028  78.655  52.424  0.00  0.00      MON1  
ATOM   3624  CA  ILE M 230      51.526  80.070  52.163  0.00  0.00      MON1  
ATOM   3625  HA  ILE M 230      51.591  81.052  51.713  0.00  0.00      MON1  
ATOM   3626  CB  ILE M 230      51.797  80.254  53.645  0.00  0.00      MON1  
ATOM   3627  HB  ILE M 230      52.852  80.555  53.826  0.00  0.00      MON1  
ATOM   3628  CG2 ILE M 230      50.857  81.349  54.174  0.00  0.00      MON1  
ATOM   3629 HG21 ILE M 230      49.794  81.048  54.085  0.00  0.00      MON1  
ATOM   3630 HG22 ILE M 230      51.011  82.291  53.602  0.00  0.00      MON1  
ATOM   3631 HG23 ILE M 230      51.076  81.567  55.240  0.00  0.00      MON1  
ATOM   3632  CG1 ILE M 230      51.536  78.960  54.380  0.00  0.00      MON1  
ATOM   3633 HG11 ILE M 230      52.053  78.213  53.787  0.00  0.00      MON1  
ATOM   3634 HG12 ILE M 230      50.462  78.805  54.281  0.00  0.00      MON1  
ATOM   3635  CD  ILE M 230      51.881  78.952  55.871  0.00  0.00      MON1  
ATOM   3636  HD1 ILE M 230      51.270  79.682  56.439  0.00  0.00      MON1  
ATOM   3637  HD2 ILE M 230      52.948  79.230  55.997  0.00  0.00      MON1  
ATOM   3638  HD3 ILE M 230      51.740  77.945  56.308  0.00  0.00      MON1  
ATOM   3639  C   ILE M 230      52.555  79.218  51.467  0.00  0.00      MON1  
ATOM   3640  O   ILE M 230      52.470  77.989  51.395  0.00  0.00      MON1  
ATOM   3641  N   SER M 231      53.529  79.901  50.851  0.00  0.00      MON1  
ATOM   3642  HN  SER M 231      53.612  80.891  50.952  0.00  0.00      MON1  
ATOM   3643  CA  SER M 231      54.611  79.269  50.143  0.00  0.00      MON1  
ATOM   3644  HA  SER M 231      54.189  78.489  49.527  0.00  0.00      MON1  
ATOM   3645  CB  SER M 231      55.370  80.297  49.274  0.00  0.00      MON1  
ATOM   3646  HB1 SER M 231      54.601  80.868  48.734  0.00  0.00      MON1  
ATOM   3647  HB2 SER M 231      56.018  79.818  48.520  0.00  0.00      MON1  
ATOM   3648  OG  SER M 231      56.089  81.233  50.079  0.00  0.00      MON1  
ATOM   3649  HG1 SER M 231      55.949  82.168  49.782  0.00  0.00      MON1  
ATOM   3650  C   SER M 231      55.571  78.695  51.152  0.00  0.00      MON1  
ATOM   3651  O   SER M 231      55.457  78.977  52.339  0.00  0.00      MON1  
ATOM   3652  N   PRO M 232      56.560  77.935  50.730  0.00  0.00      MON1  
ATOM   3653  CD  PRO M 232      56.438  77.105  49.536  0.00  0.00      MON1  
ATOM   3654  HD1 PRO M 232      56.663  77.678  48.617  0.00  0.00      MON1  
ATOM   3655  HD2 PRO M 232      55.412  76.678  49.446  0.00  0.00      MON1  
ATOM   3656  CA  PRO M 232      57.524  77.399  51.658  0.00  0.00      MON1  
ATOM   3657  HA  PRO M 232      56.985  76.874  52.436  0.00  0.00      MON1  
ATOM   3658  CB  PRO M 232      58.405  76.475  50.817  0.00  0.00      MON1  
ATOM   3659  HB1 PRO M 232      58.853  75.658  51.418  0.00  0.00      MON1  
ATOM   3660  HB2 PRO M 232      59.215  77.047  50.309  0.00  0.00      MON1  
ATOM   3661  CG  PRO M 232      57.436  75.965  49.747  0.00  0.00      MON1  
ATOM   3662  HG1 PRO M 232      57.934  75.641  48.812  0.00  0.00      MON1  
ATOM   3663  HG2 PRO M 232      56.874  75.115  50.179  0.00  0.00      MON1  
ATOM   3664  C   PRO M 232      58.308  78.495  52.306  0.00  0.00      MON1  
ATOM   3665  O   PRO M 232      58.544  78.371  53.492  0.00  0.00      MON1  
ATOM   3666  N   TYR M 233      58.688  79.577  51.602  0.00  0.00      MON1  
ATOM   3667  HN  TYR M 233      58.456  79.659  50.629  0.00  0.00      MON1  
ATOM   3668  CA  TYR M 233      59.338  80.699  52.254  0.00  0.00      MON1  
ATOM   3669  HA  TYR M 233      60.208  80.336  52.786  0.00  0.00      MON1  
ATOM   3670  CB  TYR M 233      59.730  81.840  51.292  0.00  0.00      MON1  
ATOM   3671  HB1 TYR M 233      60.061  82.742  51.852  0.00  0.00      MON1  
ATOM   3672  HB2 TYR M 233      58.865  82.129  50.653  0.00  0.00      MON1  
ATOM   3673  CG  TYR M 233      60.882  81.439  50.436  0.00  0.00      MON1  
ATOM   3674  CD1 TYR M 233      62.190  81.459  50.915  0.00  0.00      MON1  
ATOM   3675  HD1 TYR M 233      62.378  81.709  51.950  0.00  0.00      MON1  
ATOM   3676  CE1 TYR M 233      63.264  81.141  50.072  0.00  0.00      MON1  
ATOM   3677  HE1 TYR M 233      64.270  81.140  50.466  0.00  0.00      MON1  
ATOM   3678  CZ  TYR M 233      63.030  80.787  48.740  0.00  0.00      MON1  
ATOM   3679  OH  TYR M 233      64.095  80.447  47.885  0.00  0.00      MON1  
ATOM   3680  HH  TYR M 233      64.641  79.800  48.352  0.00  0.00      MON1  
ATOM   3681  CD2 TYR M 233      60.682  81.135  49.105  0.00  0.00      MON1  
ATOM   3682  HD2 TYR M 233      59.701  81.294  48.764  0.00  0.00      MON1  
ATOM   3683  CE2 TYR M 233      61.730  80.818  48.247  0.00  0.00      MON1  
ATOM   3684  HE2 TYR M 233      61.550  80.697  47.191  0.00  0.00      MON1  
ATOM   3685  C   TYR M 233      58.442  81.334  53.276  0.00  0.00      MON1  
ATOM   3686  O   TYR M 233      58.857  81.637  54.390  0.00  0.00      MON1  
ATOM   3687  N   ALA M 234      57.164  81.539  52.914  0.00  0.00      MON1  
ATOM   3688  HN  ALA M 234      56.827  81.309  51.996  0.00  0.00      MON1  
ATOM   3689  CA  ALA M 234      56.194  82.098  53.817  0.00  0.00      MON1  
ATOM   3690  HA  ALA M 234      56.562  83.048  54.179  0.00  0.00      MON1  
ATOM   3691  CB  ALA M 234      54.838  82.305  53.144  0.00  0.00      MON1  
ATOM   3692  HB1 ALA M 234      54.466  81.352  52.729  0.00  0.00      MON1  
ATOM   3693  HB2 ALA M 234      54.943  83.022  52.307  0.00  0.00      MON1  
ATOM   3694  HB3 ALA M 234      54.086  82.727  53.845  0.00  0.00      MON1  
ATOM   3695  C   ALA M 234      55.998  81.201  55.006  0.00  0.00      MON1  
ATOM   3696  O   ALA M 234      55.896  81.645  56.135  0.00  0.00      MON1  
ATOM   3697  N   ASP M 235      55.971  79.872  54.829  0.00  0.00      MON1  
ATOM   3698  HN  ASP M 235      55.869  79.468  53.910  0.00  0.00      MON1  
ATOM   3699  CA  ASP M 235      55.878  78.967  55.955  0.00  0.00      MON1  
ATOM   3700  HA  ASP M 235      54.965  79.149  56.501  0.00  0.00      MON1  
ATOM   3701  CB  ASP M 235      56.067  77.469  55.607  0.00  0.00      MON1  
ATOM   3702  HB1 ASP M 235      56.044  76.840  56.526  0.00  0.00      MON1  
ATOM   3703  HB2 ASP M 235      57.033  77.322  55.094  0.00  0.00      MON1  
ATOM   3704  CG  ASP M 235      55.036  76.901  54.679  0.00  0.00      MON1  
ATOM   3705  OD1 ASP M 235      54.072  77.604  54.373  0.00  0.00      MON1  
ATOM   3706  OD2 ASP M 235      55.172  75.699  54.312  0.00  0.00      MON1  
ATOM   3707  C   ASP M 235      57.040  79.188  56.866  0.00  0.00      MON1  
ATOM   3708  O   ASP M 235      56.905  79.241  58.086  0.00  0.00      MON1  
ATOM   3709  N   VAL M 236      58.227  79.324  56.250  0.00  0.00      MON1  
ATOM   3710  HN  VAL M 236      58.274  79.296  55.249  0.00  0.00      MON1  
ATOM   3711  CA  VAL M 236      59.469  79.463  56.958  0.00  0.00      MON1  
ATOM   3712  HA  VAL M 236      59.587  78.610  57.613  0.00  0.00      MON1  
ATOM   3713  CB  VAL M 236      60.676  79.559  56.054  0.00  0.00      MON1  
ATOM   3714  HB  VAL M 236      60.577  80.374  55.309  0.00  0.00      MON1  
ATOM   3715  CG1 VAL M 236      61.949  79.791  56.881  0.00  0.00      MON1  
ATOM   3716 HG11 VAL M 236      61.861  79.461  57.936  0.00  0.00      MON1  
ATOM   3717 HG12 VAL M 236      62.245  80.847  56.779  0.00  0.00      MON1  
ATOM   3718 HG13 VAL M 236      62.787  79.203  56.435  0.00  0.00      MON1  
ATOM   3719  CG2 VAL M 236      60.831  78.250  55.301  0.00  0.00      MON1  
ATOM   3720 HG21 VAL M 236      59.878  77.766  55.106  0.00  0.00      MON1  
ATOM   3721 HG22 VAL M 236      61.368  77.549  55.975  0.00  0.00      MON1  
ATOM   3722 HG23 VAL M 236      61.431  78.361  54.372  0.00  0.00      MON1  
ATOM   3723  C   VAL M 236      59.451  80.676  57.815  0.00  0.00      MON1  
ATOM   3724  O   VAL M 236      59.868  80.622  58.971  0.00  0.00      MON1  
ATOM   3725  N   ILE M 237      58.936  81.805  57.293  0.00  0.00      MON1  
ATOM   3726  HN  ILE M 237      58.606  81.835  56.345  0.00  0.00      MON1  
ATOM   3727  CA  ILE M 237      58.898  83.006  58.092  0.00  0.00      MON1  
ATOM   3728  HA  ILE M 237      59.910  83.203  58.422  0.00  0.00      MON1  
ATOM   3729  CB  ILE M 237      58.404  84.231  57.341  0.00  0.00      MON1  
ATOM   3730  HB  ILE M 237      58.933  84.254  56.355  0.00  0.00      MON1  
ATOM   3731  CG2 ILE M 237      56.897  84.255  57.054  0.00  0.00      MON1  
ATOM   3732 HG21 ILE M 237      56.395  85.018  57.686  0.00  0.00      MON1  
ATOM   3733 HG22 ILE M 237      56.345  83.357  57.273  0.00  0.00      MON1  
ATOM   3734 HG23 ILE M 237      56.707  84.532  55.994  0.00  0.00      MON1  
ATOM   3735  CG1 ILE M 237      58.811  85.487  58.127  0.00  0.00      MON1  
ATOM   3736 HG11 ILE M 237      59.907  85.487  57.966  0.00  0.00      MON1  
ATOM   3737 HG12 ILE M 237      58.589  85.425  59.212  0.00  0.00      MON1  
ATOM   3738  CD  ILE M 237      58.294  86.809  57.564  0.00  0.00      MON1  
ATOM   3739  HD1 ILE M 237      57.234  86.978  57.849  0.00  0.00      MON1  
ATOM   3740  HD2 ILE M 237      58.351  86.809  56.455  0.00  0.00      MON1  
ATOM   3741  HD3 ILE M 237      58.888  87.660  57.963  0.00  0.00      MON1  
ATOM   3742  C   ILE M 237      58.068  82.806  59.332  0.00  0.00      MON1  
ATOM   3743  O   ILE M 237      58.477  83.164  60.435  0.00  0.00      MON1  
ATOM   3744  N   ALA M 238      56.892  82.169  59.192  0.00  0.00      MON1  
ATOM   3745  HN  ALA M 238      56.606  81.838  58.291  0.00  0.00      MON1  
ATOM   3746  CA  ALA M 238      55.992  81.983  60.284  0.00  0.00      MON1  
ATOM   3747  HA  ALA M 238      55.824  82.945  60.751  0.00  0.00      MON1  
ATOM   3748  CB  ALA M 238      54.663  81.422  59.769  0.00  0.00      MON1  
ATOM   3749  HB1 ALA M 238      54.735  80.350  59.488  0.00  0.00      MON1  
ATOM   3750  HB2 ALA M 238      54.368  81.978  58.850  0.00  0.00      MON1  
ATOM   3751  HB3 ALA M 238      53.856  81.589  60.506  0.00  0.00      MON1  
ATOM   3752  C   ALA M 238      56.581  81.069  61.322  0.00  0.00      MON1  
ATOM   3753  O   ALA M 238      56.533  81.348  62.517  0.00  0.00      MON1  
ATOM   3754  N   SER M 239      57.174  79.953  60.858  0.00  0.00      MON1  
ATOM   3755  HN  SER M 239      57.180  79.784  59.867  0.00  0.00      MON1  
ATOM   3756  CA  SER M 239      57.788  78.943  61.701  0.00  0.00      MON1  
ATOM   3757  HA  SER M 239      57.043  78.646  62.427  0.00  0.00      MON1  
ATOM   3758  CB  SER M 239      58.184  77.697  60.870  0.00  0.00      MON1  
ATOM   3759  HB1 SER M 239      59.233  77.743  60.509  0.00  0.00      MON1  
ATOM   3760  HB2 SER M 239      57.530  77.667  59.971  0.00  0.00      MON1  
ATOM   3761  OG  SER M 239      57.929  76.488  61.583  0.00  0.00      MON1  
ATOM   3762  HG1 SER M 239      58.736  76.247  62.095  0.00  0.00      MON1  
ATOM   3763  C   SER M 239      58.952  79.525  62.486  0.00  0.00      MON1  
ATOM   3764  O   SER M 239      59.087  79.259  63.676  0.00  0.00      MON1  
ATOM   3765  N   SER M 240      59.770  80.412  61.868  0.00  0.00      MON1  
ATOM   3766  HN  SER M 240      59.649  80.617  60.892  0.00  0.00      MON1  
ATOM   3767  CA  SER M 240      60.888  81.042  62.545  0.00  0.00      MON1  
ATOM   3768  HA  SER M 240      61.510  80.256  62.953  0.00  0.00      MON1  
ATOM   3769  CB  SER M 240      61.727  81.907  61.585  0.00  0.00      MON1  
ATOM   3770  HB1 SER M 240      61.154  82.791  61.228  0.00  0.00      MON1  
ATOM   3771  HB2 SER M 240      61.956  81.276  60.700  0.00  0.00      MON1  
ATOM   3772  OG  SER M 240      62.957  82.304  62.188  0.00  0.00      MON1  
ATOM   3773  HG1 SER M 240      63.484  81.499  62.278  0.00  0.00      MON1  
ATOM   3774  C   SER M 240      60.428  81.893  63.697  0.00  0.00      MON1  
ATOM   3775  O   SER M 240      60.999  81.852  64.784  0.00  0.00      MON1  
ATOM   3776  N   PHE M 241      59.339  82.667  63.503  0.00  0.00      MON1  
ATOM   3777  HN  PHE M 241      58.880  82.685  62.613  0.00  0.00      MON1  
ATOM   3778  CA  PHE M 241      58.818  83.506  64.556  0.00  0.00      MON1  
ATOM   3779  HA  PHE M 241      59.637  84.120  64.909  0.00  0.00      MON1  
ATOM   3780  CB  PHE M 241      57.651  84.373  64.042  0.00  0.00      MON1  
ATOM   3781  HB1 PHE M 241      56.676  83.841  64.009  0.00  0.00      MON1  
ATOM   3782  HB2 PHE M 241      57.881  84.719  63.009  0.00  0.00      MON1  
ATOM   3783  CG  PHE M 241      57.556  85.558  64.936  0.00  0.00      MON1  
ATOM   3784  CD1 PHE M 241      56.970  85.455  66.201  0.00  0.00      MON1  
ATOM   3785  HD1 PHE M 241      56.555  84.518  66.538  0.00  0.00      MON1  
ATOM   3786  CE1 PHE M 241      56.943  86.553  67.034  0.00  0.00      MON1  
ATOM   3787  HE1 PHE M 241      56.587  86.434  68.033  0.00  0.00      MON1  
ATOM   3788  CZ  PHE M 241      57.402  87.769  66.563  0.00  0.00      MON1  
ATOM   3789  HZ  PHE M 241      57.161  88.600  67.154  0.00  0.00      MON1  
ATOM   3790  CD2 PHE M 241      58.116  86.773  64.521  0.00  0.00      MON1  
ATOM   3791  HD2 PHE M 241      58.590  86.844  63.553  0.00  0.00      MON1  
ATOM   3792  CE2 PHE M 241      58.039  87.896  65.338  0.00  0.00      MON1  
ATOM   3793  HE2 PHE M 241      58.410  88.853  64.999  0.00  0.00      MON1  
ATOM   3794  C   PHE M 241      58.327  82.673  65.728  0.00  0.00      MON1  
ATOM   3795  O   PHE M 241      58.604  82.972  66.886  0.00  0.00      MON1  
ATOM   3796  N   GLY M 242      57.579  81.589  65.429  0.00  0.00      MON1  
ATOM   3797  HN  GLY M 242      57.404  81.396  64.460  0.00  0.00      MON1  
ATOM   3798  CA  GLY M 242      57.012  80.646  66.393  0.00  0.00      MON1  
ATOM   3799  HA1 GLY M 242      56.445  79.919  65.830  0.00  0.00      MON1  
ATOM   3800  HA2 GLY M 242      56.408  81.205  67.092  0.00  0.00      MON1  
ATOM   3801  C   GLY M 242      58.032  79.873  67.200  0.00  0.00      MON1  
ATOM   3802  O   GLY M 242      57.814  79.593  68.380  0.00  0.00      MON1  
ATOM   3803  N   ASP M 243      59.184  79.530  66.597  0.00  0.00      MON1  
ATOM   3804  HN  ASP M 243      59.272  79.613  65.600  0.00  0.00      MON1  
ATOM   3805  CA  ASP M 243      60.380  79.050  67.272  0.00  0.00      MON1  
ATOM   3806  HA  ASP M 243      60.099  78.198  67.876  0.00  0.00      MON1  
ATOM   3807  CB  ASP M 243      61.388  78.631  66.177  0.00  0.00      MON1  
ATOM   3808  HB1 ASP M 243      62.367  78.350  66.620  0.00  0.00      MON1  
ATOM   3809  HB2 ASP M 243      61.559  79.461  65.460  0.00  0.00      MON1  
ATOM   3810  CG  ASP M 243      60.884  77.431  65.406  0.00  0.00      MON1  
ATOM   3811  OD1 ASP M 243      60.282  76.521  66.046  0.00  0.00      MON1  
ATOM   3812  OD2 ASP M 243      61.274  77.262  64.231  0.00  0.00      MON1  
ATOM   3813  C   ASP M 243      60.988  80.081  68.251  0.00  0.00      MON1  
ATOM   3814  O   ASP M 243      61.219  79.761  69.418  0.00  0.00      MON1  
ATOM   3815  N   LEU M 244      61.122  81.379  67.861  0.00  0.00      MON1  
ATOM   3816  HN  LEU M 244      60.939  81.631  66.908  0.00  0.00      MON1  
ATOM   3817  CA  LEU M 244      61.485  82.467  68.779  0.00  0.00      MON1  
ATOM   3818  HA  LEU M 244      62.465  82.239  69.169  0.00  0.00      MON1  
ATOM   3819  CB  LEU M 244      61.524  83.865  68.098  0.00  0.00      MON1  
ATOM   3820  HB1 LEU M 244      61.676  84.656  68.867  0.00  0.00      MON1  
ATOM   3821  HB2 LEU M 244      60.549  84.067  67.613  0.00  0.00      MON1  
ATOM   3822  CG  LEU M 244      62.629  84.056  67.042  0.00  0.00      MON1  
ATOM   3823  HG  LEU M 244      62.615  83.189  66.340  0.00  0.00      MON1  
ATOM   3824  CD1 LEU M 244      62.377  85.320  66.204  0.00  0.00      MON1  
ATOM   3825 HD11 LEU M 244      62.397  86.225  66.846  0.00  0.00      MON1  
ATOM   3826 HD12 LEU M 244      61.389  85.261  65.701  0.00  0.00      MON1  
ATOM   3827 HD13 LEU M 244      63.159  85.420  65.420  0.00  0.00      MON1  
ATOM   3828  CD2 LEU M 244      64.009  84.139  67.704  0.00  0.00      MON1  
ATOM   3829 HD21 LEU M 244      64.263  83.182  68.205  0.00  0.00      MON1  
ATOM   3830 HD22 LEU M 244      64.034  84.956  68.455  0.00  0.00      MON1  
ATOM   3831 HD23 LEU M 244      64.782  84.352  66.937  0.00  0.00      MON1  
ATOM   3832  C   LEU M 244      60.566  82.549  70.005  0.00  0.00      MON1  
ATOM   3833  O   LEU M 244      61.045  82.732  71.119  0.00  0.00      MON1  
ATOM   3834  N   ILE M 245      59.233  82.385  69.835  0.00  0.00      MON1  
ATOM   3835  HN  ILE M 245      58.884  82.312  68.898  0.00  0.00      MON1  
ATOM   3836  CA  ILE M 245      58.258  82.291  70.929  0.00  0.00      MON1  
ATOM   3837  HA  ILE M 245      58.434  83.127  71.591  0.00  0.00      MON1  
ATOM   3838  CB  ILE M 245      56.812  82.391  70.412  0.00  0.00      MON1  
ATOM   3839  HB  ILE M 245      56.635  81.561  69.688  0.00  0.00      MON1  
ATOM   3840  CG2 ILE M 245      55.808  82.243  71.580  0.00  0.00      MON1  
ATOM   3841 HG21 ILE M 245      55.957  83.056  72.320  0.00  0.00      MON1  
ATOM   3842 HG22 ILE M 245      55.907  81.267  72.095  0.00  0.00      MON1  
ATOM   3843 HG23 ILE M 245      54.766  82.290  71.211  0.00  0.00      MON1  
ATOM   3844  CG1 ILE M 245      56.561  83.720  69.656  0.00  0.00      MON1  
ATOM   3845 HG11 ILE M 245      57.332  83.855  68.866  0.00  0.00      MON1  
ATOM   3846 HG12 ILE M 245      56.673  84.567  70.368  0.00  0.00      MON1  
ATOM   3847  CD  ILE M 245      55.180  83.784  68.985  0.00  0.00      MON1  
ATOM   3848  HD1 ILE M 245      54.362  83.769  69.734  0.00  0.00      MON1  
ATOM   3849  HD2 ILE M 245      55.046  82.925  68.294  0.00  0.00      MON1  
ATOM   3850  HD3 ILE M 245      55.076  84.719  68.395  0.00  0.00      MON1  
ATOM   3851  C   ILE M 245      58.403  81.023  71.796  0.00  0.00      MON1  
ATOM   3852  O   ILE M 245      58.550  81.095  73.019  0.00  0.00      MON1  
ATOM   3853  N   SER M 246      58.359  79.828  71.163  0.00  0.00      MON1  
ATOM   3854  HN  SER M 246      58.314  79.819  70.160  0.00  0.00      MON1  
ATOM   3855  CA  SER M 246      58.238  78.520  71.812  0.00  0.00      MON1  
ATOM   3856  HA  SER M 246      57.568  78.634  72.653  0.00  0.00      MON1  
ATOM   3857  CB  SER M 246      57.629  77.437  70.871  0.00  0.00      MON1  
ATOM   3858  HB1 SER M 246      56.599  77.752  70.591  0.00  0.00      MON1  
ATOM   3859  HB2 SER M 246      57.543  76.464  71.403  0.00  0.00      MON1  
ATOM   3860  OG  SER M 246      58.392  77.247  69.675  0.00  0.00      MON1  
ATOM   3861  HG1 SER M 246      58.230  78.032  69.118  0.00  0.00      MON1  
ATOM   3862  C   SER M 246      59.533  77.944  72.380  0.00  0.00      MON1  
ATOM   3863  O   SER M 246      59.483  77.074  73.247  0.00  0.00      MON1  
ATOM   3864  N   LYR M 247      60.707  78.434  71.933  0.00  0.00      MON1  
ATOM   3865  HN  LYR M 247      60.703  79.079  71.164  0.00  0.00      MON1  
ATOM   3866  CA  LYR M 247      62.027  78.016  72.376  0.00  0.00      MON1  
ATOM   3867  HA  LYR M 247      61.921  77.330  73.203  0.00  0.00      MON1  
ATOM   3868  C   LYR M 247      62.849  79.168  72.942  0.00  0.00      MON1  
ATOM   3869  O   LYR M 247      62.872  79.352  74.157  0.00  0.00      MON1  
ATOM   3870  CB  LYR M 247      62.782  77.319  71.235  0.00  0.00      MON1  
ATOM   3871  HB1 LYR M 247      63.862  77.217  71.476  0.00  0.00      MON1  
ATOM   3872  HB2 LYR M 247      62.692  77.935  70.319  0.00  0.00      MON1  
ATOM   3873  CG  LYR M 247      62.252  75.925  70.951  0.00  0.00      MON1  
ATOM   3874  HG1 LYR M 247      61.168  75.989  70.756  0.00  0.00      MON1  
ATOM   3875  HG2 LYR M 247      62.385  75.331  71.867  0.00  0.00      MON1  
ATOM   3876  CD  LYR M 247      62.977  75.251  69.781  0.00  0.00      MON1  
ATOM   3877  HD1 LYR M 247      62.841  74.164  69.841  0.00  0.00      MON1  
ATOM   3878  HD2 LYR M 247      64.061  75.416  69.828  0.00  0.00      MON1  
ATOM   3879  CE  LYR M 247      62.548  75.717  68.396  0.00  0.00      MON1  
ATOM   3880  HE1 LYR M 247      63.209  75.330  67.606  0.00  0.00      MON1  
ATOM   3881  HE2 LYR M 247      62.608  76.810  68.294  0.00  0.00      MON1  
ATOM   3882  N16 LYR M 247      61.202  75.332  68.024  0.00  0.00      MON1  
ATOM   3883  H16 LYR M 247      60.826  75.808  67.055  0.00  0.00      MON1  
ATOM   3884  C15 LYR M 247      60.346  74.555  68.587  0.00  0.00      MON1  
ATOM   3885  H15 LYR M 247      60.604  74.110  69.546  0.00  0.00      MON1  
ATOM   3886  C14 LYR M 247      59.130  74.213  67.917  0.00  0.00      MON1  
ATOM   3887  H14 LYR M 247      59.095  74.521  66.862  0.00  0.00      MON1  
ATOM   3888  C13 LYR M 247      58.118  73.519  68.516  0.00  0.00      MON1  
ATOM   3889  C20 LYR M 247      58.124  73.246  69.996  0.00  0.00      MON1  
ATOM   3890 H20A LYR M 247      58.430  74.141  70.553  0.00  0.00      MON1  
ATOM   3891 H20B LYR M 247      58.822  72.424  70.225  0.00  0.00      MON1  
ATOM   3892 H20C LYR M 247      57.159  72.892  70.373  0.00  0.00      MON1  
ATOM   3893  C12 LYR M 247      57.062  73.050  67.645  0.00  0.00      MON1  
ATOM   3894  H12 LYR M 247      57.230  73.269  66.584  0.00  0.00      MON1  
ATOM   3895  C11 LYR M 247      55.935  72.377  68.011  0.00  0.00      MON1  
ATOM   3896  H11 LYR M 247      55.777  72.129  69.066  0.00  0.00      MON1  
ATOM   3897  C10 LYR M 247      55.019  71.904  67.008  0.00  0.00      MON1  
ATOM   3898  H10 LYR M 247      55.442  71.856  65.995  0.00  0.00      MON1  
ATOM   3899  C9  LYR M 247      53.709  71.523  67.162  0.00  0.00      MON1  
ATOM   3900  C19 LYR M 247      52.953  71.714  68.452  0.00  0.00      MON1  
ATOM   3901 H19A LYR M 247      53.629  72.068  69.243  0.00  0.00      MON1  
ATOM   3902 H19B LYR M 247      52.510  70.765  68.793  0.00  0.00      MON1  
ATOM   3903 H19C LYR M 247      52.147  72.458  68.326  0.00  0.00      MON1  
ATOM   3904  C8  LYR M 247      53.048  70.976  65.995  0.00  0.00      MON1  
ATOM   3905  H8  LYR M 247      53.712  70.912  65.132  0.00  0.00      MON1  
ATOM   3906  C7  LYR M 247      51.754  70.548  65.939  0.00  0.00      MON1  
ATOM   3907  H7  LYR M 247      51.213  70.652  66.879  0.00  0.00      MON1  
ATOM   3908  C6  LYR M 247      50.999  69.907  64.860  0.00  0.00      MON1  
ATOM   3909  C5  LYR M 247      49.705  69.544  65.105  0.00  0.00      MON1  
ATOM   3910  C18 LYR M 247      49.040  69.863  66.414  0.00  0.00      MON1  
ATOM   3911 H18A LYR M 247      49.041  70.935  66.665  0.00  0.00      MON1  
ATOM   3912 H18B LYR M 247      49.576  69.383  67.245  0.00  0.00      MON1  
ATOM   3913 H18C LYR M 247      47.998  69.509  66.438  0.00  0.00      MON1  
ATOM   3914  C4  LYR M 247      48.849  68.738  64.158  0.00  0.00      MON1  
ATOM   3915  H4A LYR M 247      48.111  69.384  63.638  0.00  0.00      MON1  
ATOM   3916  H4B LYR M 247      48.244  68.027  64.746  0.00  0.00      MON1  
ATOM   3917  C3  LYR M 247      49.703  67.995  63.149  0.00  0.00      MON1  
ATOM   3918  H3A LYR M 247      49.077  67.479  62.401  0.00  0.00      MON1  
ATOM   3919  H3B LYR M 247      50.267  67.226  63.706  0.00  0.00      MON1  
ATOM   3920  C2  LYR M 247      50.661  68.988  62.503  0.00  0.00      MON1  
ATOM   3921  H2A LYR M 247      50.072  69.808  62.053  0.00  0.00      MON1  
ATOM   3922  H2B LYR M 247      51.231  68.545  61.669  0.00  0.00      MON1  
ATOM   3923  C1  LYR M 247      51.671  69.590  63.514  0.00  0.00      MON1  
ATOM   3924  C16 LYR M 247      52.219  70.870  62.855  0.00  0.00      MON1  
ATOM   3925 H16A LYR M 247      52.975  71.379  63.463  0.00  0.00      MON1  
ATOM   3926 H16B LYR M 247      51.409  71.591  62.673  0.00  0.00      MON1  
ATOM   3927 H16C LYR M 247      52.685  70.627  61.885  0.00  0.00      MON1  
ATOM   3928  C17 LYR M 247      52.813  68.575  63.750  0.00  0.00      MON1  
ATOM   3929 H17A LYR M 247      52.433  67.656  64.223  0.00  0.00      MON1  
ATOM   3930 H17B LYR M 247      53.576  68.974  64.433  0.00  0.00      MON1  
ATOM   3931 H17C LYR M 247      53.312  68.313  62.801  0.00  0.00      MON1  
ATOM   3932  N   ASN M 248      63.511  79.989  72.094  0.00  0.00      MON1  
ATOM   3933  HN  ASN M 248      63.522  79.759  71.118  0.00  0.00      MON1  
ATOM   3934  CA  ASN M 248      64.417  81.065  72.504  0.00  0.00      MON1  
ATOM   3935  HA  ASN M 248      65.244  80.576  73.004  0.00  0.00      MON1  
ATOM   3936  CB  ASN M 248      65.011  81.820  71.283  0.00  0.00      MON1  
ATOM   3937  HB1 ASN M 248      65.059  82.917  71.452  0.00  0.00      MON1  
ATOM   3938  HB2 ASN M 248      64.408  81.632  70.373  0.00  0.00      MON1  
ATOM   3939  CG  ASN M 248      66.454  81.359  71.068  0.00  0.00      MON1  
ATOM   3940  OD1 ASN M 248      67.386  81.906  71.664  0.00  0.00      MON1  
ATOM   3941  ND2 ASN M 248      66.671  80.354  70.195  0.00  0.00      MON1  
ATOM   3942 HD21 ASN M 248      65.903  79.795  69.839  0.00  0.00      MON1  
ATOM   3943 HD22 ASN M 248      67.609  80.120  69.973  0.00  0.00      MON1  
ATOM   3944  C   ASN M 248      63.855  82.042  73.560  0.00  0.00      MON1  
ATOM   3945  O   ASN M 248      64.567  82.430  74.483  0.00  0.00      MON1  
ATOM   3946  N   MET M 249      62.559  82.420  73.488  0.00  0.00      MON1  
ATOM   3947  HN  MET M 249      62.020  82.226  72.665  0.00  0.00      MON1  
ATOM   3948  CA  MET M 249      61.854  83.089  74.573  0.00  0.00      MON1  
ATOM   3949  HA  MET M 249      62.542  83.738  75.072  0.00  0.00      MON1  
ATOM   3950  CB  MET M 249      60.667  83.947  74.069  0.00  0.00      MON1  
ATOM   3951  HB1 MET M 249      60.065  84.310  74.933  0.00  0.00      MON1  
ATOM   3952  HB2 MET M 249      60.008  83.308  73.442  0.00  0.00      MON1  
ATOM   3953  CG  MET M 249      61.096  85.188  73.255  0.00  0.00      MON1  
ATOM   3954  HG1 MET M 249      60.174  85.641  72.828  0.00  0.00      MON1  
ATOM   3955  HG2 MET M 249      61.713  84.862  72.389  0.00  0.00      MON1  
ATOM   3956  SD  MET M 249      61.986  86.459  74.213  0.00  0.00      MON1  
ATOM   3957  CE  MET M 249      63.669  86.028  73.678  0.00  0.00      MON1  
ATOM   3958  HE1 MET M 249      63.764  86.070  72.572  0.00  0.00      MON1  
ATOM   3959  HE2 MET M 249      63.954  85.005  74.002  0.00  0.00      MON1  
ATOM   3960  HE3 MET M 249      64.415  86.729  74.109  0.00  0.00      MON1  
ATOM   3961  C   MET M 249      61.432  82.198  75.722  0.00  0.00      MON1  
ATOM   3962  O   MET M 249      61.877  82.422  76.841  0.00  0.00      MON1  
ATOM   3963  N   PHE M 250      60.621  81.137  75.508  0.00  0.00      MON1  
ATOM   3964  HN  PHE M 250      60.278  80.948  74.588  0.00  0.00      MON1  
ATOM   3965  CA  PHE M 250      60.147  80.259  76.584  0.00  0.00      MON1  
ATOM   3966  HA  PHE M 250      59.517  80.856  77.229  0.00  0.00      MON1  
ATOM   3967  CB  PHE M 250      59.272  79.124  75.975  0.00  0.00      MON1  
ATOM   3968  HB1 PHE M 250      59.888  78.563  75.240  0.00  0.00      MON1  
ATOM   3969  HB2 PHE M 250      58.411  79.567  75.429  0.00  0.00      MON1  
ATOM   3970  CG  PHE M 250      58.750  78.135  76.995  0.00  0.00      MON1  
ATOM   3971  CD1 PHE M 250      57.458  78.268  77.532  0.00  0.00      MON1  
ATOM   3972  HD1 PHE M 250      56.837  79.103  77.238  0.00  0.00      MON1  
ATOM   3973  CE1 PHE M 250      56.963  77.321  78.440  0.00  0.00      MON1  
ATOM   3974  HE1 PHE M 250      55.971  77.434  78.853  0.00  0.00      MON1  
ATOM   3975  CZ  PHE M 250      57.759  76.235  78.823  0.00  0.00      MON1  
ATOM   3976  HZ  PHE M 250      57.394  75.508  79.532  0.00  0.00      MON1  
ATOM   3977  CD2 PHE M 250      59.528  77.026  77.374  0.00  0.00      MON1  
ATOM   3978  HD2 PHE M 250      60.520  76.897  76.964  0.00  0.00      MON1  
ATOM   3979  CE2 PHE M 250      59.046  76.094  78.300  0.00  0.00      MON1  
ATOM   3980  HE2 PHE M 250      59.666  75.259  78.602  0.00  0.00      MON1  
ATOM   3981  C   PHE M 250      61.259  79.703  77.490  0.00  0.00      MON1  
ATOM   3982  O   PHE M 250      61.144  79.753  78.713  0.00  0.00      MON1  
ATOM   3983  N   GLY M 251      62.383  79.228  76.905  0.00  0.00      MON1  
ATOM   3984  HN  GLY M 251      62.453  79.250  75.900  0.00  0.00      MON1  
ATOM   3985  CA  GLY M 251      63.580  78.784  77.620  0.00  0.00      MON1  
ATOM   3986  HA1 GLY M 251      64.280  78.412  76.886  0.00  0.00      MON1  
ATOM   3987  HA2 GLY M 251      63.292  78.029  78.340  0.00  0.00      MON1  
ATOM   3988  C   GLY M 251      64.289  79.881  78.383  0.00  0.00      MON1  
ATOM   3989  O   GLY M 251      64.806  79.666  79.477  0.00  0.00      MON1  
ATOM   3990  N   LEU M 252      64.334  81.112  77.851  0.00  0.00      MON1  
ATOM   3991  HN  LEU M 252      63.956  81.289  76.943  0.00  0.00      MON1  
ATOM   3992  CA  LEU M 252      64.837  82.268  78.558  0.00  0.00      MON1  
ATOM   3993  HA  LEU M 252      65.814  81.991  78.921  0.00  0.00      MON1  
ATOM   3994  CB  LEU M 252      64.990  83.469  77.592  0.00  0.00      MON1  
ATOM   3995  HB1 LEU M 252      64.006  83.697  77.131  0.00  0.00      MON1  
ATOM   3996  HB2 LEU M 252      65.666  83.148  76.766  0.00  0.00      MON1  
ATOM   3997  CG  LEU M 252      65.559  84.770  78.198  0.00  0.00      MON1  
ATOM   3998  HG  LEU M 252      64.878  85.121  79.009  0.00  0.00      MON1  
ATOM   3999  CD1 LEU M 252      66.958  84.555  78.799  0.00  0.00      MON1  
ATOM   4000 HD11 LEU M 252      67.648  84.158  78.023  0.00  0.00      MON1  
ATOM   4001 HD12 LEU M 252      66.922  83.830  79.638  0.00  0.00      MON1  
ATOM   4002 HD13 LEU M 252      67.369  85.513  79.180  0.00  0.00      MON1  
ATOM   4003  CD2 LEU M 252      65.606  85.868  77.124  0.00  0.00      MON1  
ATOM   4004 HD21 LEU M 252      64.591  86.050  76.710  0.00  0.00      MON1  
ATOM   4005 HD22 LEU M 252      66.270  85.553  76.290  0.00  0.00      MON1  
ATOM   4006 HD23 LEU M 252      65.997  86.816  77.548  0.00  0.00      MON1  
ATOM   4007  C   LEU M 252      64.019  82.641  79.811  0.00  0.00      MON1  
ATOM   4008  O   LEU M 252      64.543  82.954  80.883  0.00  0.00      MON1  
ATOM   4009  N   LEU M 253      62.685  82.586  79.716  0.00  0.00      MON1  
ATOM   4010  HN  LEU M 253      62.272  82.391  78.823  0.00  0.00      MON1  
ATOM   4011  CA  LEU M 253      61.787  82.781  80.833  0.00  0.00      MON1  
ATOM   4012  HA  LEU M 253      62.045  83.699  81.342  0.00  0.00      MON1  
ATOM   4013  CB  LEU M 253      60.326  82.807  80.354  0.00  0.00      MON1  
ATOM   4014  HB1 LEU M 253      59.658  83.060  81.200  0.00  0.00      MON1  
ATOM   4015  HB2 LEU M 253      60.029  81.810  79.956  0.00  0.00      MON1  
ATOM   4016  CG  LEU M 253      60.065  83.833  79.246  0.00  0.00      MON1  
ATOM   4017  HG  LEU M 253      60.623  83.540  78.339  0.00  0.00      MON1  
ATOM   4018  CD1 LEU M 253      58.584  83.831  78.842  0.00  0.00      MON1  
ATOM   4019 HD11 LEU M 253      57.953  84.147  79.701  0.00  0.00      MON1  
ATOM   4020 HD12 LEU M 253      58.266  82.815  78.531  0.00  0.00      MON1  
ATOM   4021 HD13 LEU M 253      58.409  84.537  78.003  0.00  0.00      MON1  
ATOM   4022  CD2 LEU M 253      60.575  85.228  79.624  0.00  0.00      MON1  
ATOM   4023 HD21 LEU M 253      61.676  85.239  79.761  0.00  0.00      MON1  
ATOM   4024 HD22 LEU M 253      60.093  85.580  80.561  0.00  0.00      MON1  
ATOM   4025 HD23 LEU M 253      60.323  85.941  78.811  0.00  0.00      MON1  
ATOM   4026  C   LEU M 253      61.923  81.665  81.816  0.00  0.00      MON1  
ATOM   4027  O   LEU M 253      61.995  81.860  83.021  0.00  0.00      MON1  
ATOM   4028  N   GLY M 254      62.002  80.432  81.296  0.00  0.00      MON1  
ATOM   4029  HN  GLY M 254      61.890  80.297  80.305  0.00  0.00      MON1  
ATOM   4030  CA  GLY M 254      62.145  79.248  82.104  0.00  0.00      MON1  
ATOM   4031  HA1 GLY M 254      62.217  78.402  81.437  0.00  0.00      MON1  
ATOM   4032  HA2 GLY M 254      61.308  79.193  82.785  0.00  0.00      MON1  
ATOM   4033  C   GLY M 254      63.398  79.299  82.911  0.00  0.00      MON1  
ATOM   4034  O   GLY M 254      63.382  78.997  84.103  0.00  0.00      MON1  
ATOM   4035  N   HSE M 255      64.516  79.729  82.297  0.00  0.00      MON1  
ATOM   4036  HN  HSE M 255      64.545  79.857  81.302  0.00  0.00      MON1  
ATOM   4037  CA  HSE M 255      65.750  79.892  83.035  0.00  0.00      MON1  
ATOM   4038  HA  HSE M 255      65.972  78.958  83.538  0.00  0.00      MON1  
ATOM   4039  CB  HSE M 255      66.969  80.263  82.172  0.00  0.00      MON1  
ATOM   4040  HB1 HSE M 255      66.770  81.184  81.586  0.00  0.00      MON1  
ATOM   4041  HB2 HSE M 255      67.152  79.427  81.464  0.00  0.00      MON1  
ATOM   4042  ND1 HSE M 255      68.871  79.366  83.572  0.00  0.00      MON1  
ATOM   4043  CG  HSE M 255      68.227  80.445  82.998  0.00  0.00      MON1  
ATOM   4044  CE1 HSE M 255      69.913  79.865  84.211  0.00  0.00      MON1  
ATOM   4045  HE1 HSE M 255      70.628  79.272  84.787  0.00  0.00      MON1  
ATOM   4046  NE2 HSE M 255      69.980  81.209  84.081  0.00  0.00      MON1  
ATOM   4047  HE2 HSE M 255      70.635  81.809  84.532  0.00  0.00      MON1  
ATOM   4048  CD2 HSE M 255      68.904  81.584  83.301  0.00  0.00      MON1  
ATOM   4049  HD2 HSE M 255      68.680  82.605  83.025  0.00  0.00      MON1  
ATOM   4050  C   HSE M 255      65.598  80.945  84.087  0.00  0.00      MON1  
ATOM   4051  O   HSE M 255      65.986  80.760  85.236  0.00  0.00      MON1  
ATOM   4052  N   PHE M 256      64.954  82.070  83.716  0.00  0.00      MON1  
ATOM   4053  HN  PHE M 256      64.629  82.177  82.775  0.00  0.00      MON1  
ATOM   4054  CA  PHE M 256      64.734  83.186  84.595  0.00  0.00      MON1  
ATOM   4055  HA  PHE M 256      65.697  83.547  84.930  0.00  0.00      MON1  
ATOM   4056  CB  PHE M 256      63.956  84.295  83.852  0.00  0.00      MON1  
ATOM   4057  HB1 PHE M 256      62.935  84.007  83.558  0.00  0.00      MON1  
ATOM   4058  HB2 PHE M 256      64.500  84.531  82.910  0.00  0.00      MON1  
ATOM   4059  CG  PHE M 256      63.887  85.534  84.675  0.00  0.00      MON1  
ATOM   4060  CD1 PHE M 256      62.961  85.686  85.707  0.00  0.00      MON1  
ATOM   4061  HD1 PHE M 256      62.411  84.839  86.045  0.00  0.00      MON1  
ATOM   4062  CE1 PHE M 256      62.899  86.838  86.469  0.00  0.00      MON1  
ATOM   4063  HE1 PHE M 256      62.198  86.870  87.279  0.00  0.00      MON1  
ATOM   4064  CZ  PHE M 256      63.839  87.837  86.257  0.00  0.00      MON1  
ATOM   4065  HZ  PHE M 256      63.917  88.675  86.924  0.00  0.00      MON1  
ATOM   4066  CD2 PHE M 256      64.803  86.557  84.443  0.00  0.00      MON1  
ATOM   4067  HD2 PHE M 256      65.533  86.464  83.650  0.00  0.00      MON1  
ATOM   4068  CE2 PHE M 256      64.780  87.690  85.249  0.00  0.00      MON1  
ATOM   4069  HE2 PHE M 256      65.437  88.487  85.079  0.00  0.00      MON1  
ATOM   4070  C   PHE M 256      63.962  82.740  85.806  0.00  0.00      MON1  
ATOM   4071  O   PHE M 256      64.295  83.084  86.939  0.00  0.00      MON1  
ATOM   4072  N   LEU M 257      62.913  81.927  85.597  0.00  0.00      MON1  
ATOM   4073  HN  LEU M 257      62.629  81.690  84.661  0.00  0.00      MON1  
ATOM   4074  CA  LEU M 257      62.118  81.460  86.694  0.00  0.00      MON1  
ATOM   4075  HA  LEU M 257      61.810  82.327  87.257  0.00  0.00      MON1  
ATOM   4076  CB  LEU M 257      60.892  80.623  86.293  0.00  0.00      MON1  
ATOM   4077  HB1 LEU M 257      61.235  79.696  85.781  0.00  0.00      MON1  
ATOM   4078  HB2 LEU M 257      60.251  81.142  85.557  0.00  0.00      MON1  
ATOM   4079  CG  LEU M 257      60.049  80.243  87.528  0.00  0.00      MON1  
ATOM   4080  HG  LEU M 257      60.669  79.659  88.246  0.00  0.00      MON1  
ATOM   4081  CD1 LEU M 257      59.470  81.459  88.246  0.00  0.00      MON1  
ATOM   4082 HD11 LEU M 257      58.866  82.072  87.547  0.00  0.00      MON1  
ATOM   4083 HD12 LEU M 257      60.264  82.087  88.698  0.00  0.00      MON1  
ATOM   4084 HD13 LEU M 257      58.804  81.085  89.045  0.00  0.00      MON1  
ATOM   4085  CD2 LEU M 257      58.925  79.327  87.122  0.00  0.00      MON1  
ATOM   4086 HD21 LEU M 257      59.257  78.819  86.196  0.00  0.00      MON1  
ATOM   4087 HD22 LEU M 257      58.040  79.929  86.832  0.00  0.00      MON1  
ATOM   4088 HD23 LEU M 257      58.642  78.615  87.924  0.00  0.00      MON1  
ATOM   4089  C   LEU M 257      62.934  80.627  87.621  0.00  0.00      MON1  
ATOM   4090  O   LEU M 257      62.861  80.802  88.829  0.00  0.00      MON1  
ATOM   4091  N   ARG M 258      63.765  79.723  87.080  0.00  0.00      MON1  
ATOM   4092  HN  ARG M 258      63.856  79.630  86.087  0.00  0.00      MON1  
ATOM   4093  CA  ARG M 258      64.584  78.868  87.903  0.00  0.00      MON1  
ATOM   4094  HA  ARG M 258      63.931  78.346  88.591  0.00  0.00      MON1  
ATOM   4095  CB  ARG M 258      65.351  77.808  87.090  0.00  0.00      MON1  
ATOM   4096  HB1 ARG M 258      66.044  77.248  87.761  0.00  0.00      MON1  
ATOM   4097  HB2 ARG M 258      65.960  78.297  86.296  0.00  0.00      MON1  
ATOM   4098  CG  ARG M 258      64.390  76.789  86.456  0.00  0.00      MON1  
ATOM   4099  HG1 ARG M 258      63.753  77.300  85.712  0.00  0.00      MON1  
ATOM   4100  HG2 ARG M 258      63.723  76.403  87.261  0.00  0.00      MON1  
ATOM   4101  CD  ARG M 258      65.078  75.595  85.790  0.00  0.00      MON1  
ATOM   4102  HD1 ARG M 258      65.699  75.035  86.525  0.00  0.00      MON1  
ATOM   4103  HD2 ARG M 258      65.723  75.967  84.955  0.00  0.00      MON1  
ATOM   4104  NE  ARG M 258      64.015  74.693  85.234  0.00  0.00      MON1  
ATOM   4105  HE  ARG M 258      63.052  74.910  85.358  0.00  0.00      MON1  
ATOM   4106  CZ  ARG M 258      64.301  73.620  84.494  0.00  0.00      MON1  
ATOM   4107  NH1 ARG M 258      65.549  73.264  84.239  0.00  0.00      MON1  
ATOM   4108 HH11 ARG M 258      66.159  74.038  84.110  0.00  0.00      MON1  
ATOM   4109 HH12 ARG M 258      65.701  72.567  83.520  0.00  0.00      MON1  
ATOM   4110  NH2 ARG M 258      63.340  72.871  83.989  0.00  0.00      MON1  
ATOM   4111 HH21 ARG M 258      63.651  72.058  83.505  0.00  0.00      MON1  
ATOM   4112 HH22 ARG M 258      62.457  72.877  84.461  0.00  0.00      MON1  
ATOM   4113  C   ARG M 258      65.538  79.649  88.755  0.00  0.00      MON1  
ATOM   4114  O   ARG M 258      65.748  79.323  89.922  0.00  0.00      MON1  
ATOM   4115  N   VAL M 259      66.122  80.727  88.204  0.00  0.00      MON1  
ATOM   4116  HN  VAL M 259      65.991  80.941  87.232  0.00  0.00      MON1  
ATOM   4117  CA  VAL M 259      66.986  81.588  88.982  0.00  0.00      MON1  
ATOM   4118  HA  VAL M 259      67.789  80.996  89.402  0.00  0.00      MON1  
ATOM   4119  CB  VAL M 259      67.574  82.718  88.167  0.00  0.00      MON1  
ATOM   4120  HB  VAL M 259      66.754  83.321  87.711  0.00  0.00      MON1  
ATOM   4121  CG1 VAL M 259      68.435  83.637  89.061  0.00  0.00      MON1  
ATOM   4122 HG11 VAL M 259      69.402  83.153  89.274  0.00  0.00      MON1  
ATOM   4123 HG12 VAL M 259      67.959  83.971  90.001  0.00  0.00      MON1  
ATOM   4124 HG13 VAL M 259      68.678  84.557  88.488  0.00  0.00      MON1  
ATOM   4125  CG2 VAL M 259      68.434  82.131  87.034  0.00  0.00      MON1  
ATOM   4126 HG21 VAL M 259      67.866  81.454  86.373  0.00  0.00      MON1  
ATOM   4127 HG22 VAL M 259      69.278  81.548  87.464  0.00  0.00      MON1  
ATOM   4128 HG23 VAL M 259      68.854  82.947  86.411  0.00  0.00      MON1  
ATOM   4129  C   VAL M 259      66.230  82.197  90.128  0.00  0.00      MON1  
ATOM   4130  O   VAL M 259      66.691  82.189  91.264  0.00  0.00      MON1  
ATOM   4131  N   LYS M 260      65.005  82.692  89.867  0.00  0.00      MON1  
ATOM   4132  HN  LYS M 260      64.642  82.667  88.934  0.00  0.00      MON1  
ATOM   4133  CA  LYS M 260      64.189  83.285  90.900  0.00  0.00      MON1  
ATOM   4134  HA  LYS M 260      64.777  84.054  91.376  0.00  0.00      MON1  
ATOM   4135  CB  LYS M 260      62.848  83.836  90.360  0.00  0.00      MON1  
ATOM   4136  HB1 LYS M 260      62.188  84.119  91.212  0.00  0.00      MON1  
ATOM   4137  HB2 LYS M 260      62.331  83.046  89.774  0.00  0.00      MON1  
ATOM   4138  CG  LYS M 260      63.005  85.086  89.493  0.00  0.00      MON1  
ATOM   4139  HG1 LYS M 260      62.005  85.387  89.104  0.00  0.00      MON1  
ATOM   4140  HG2 LYS M 260      63.650  84.845  88.618  0.00  0.00      MON1  
ATOM   4141  CD  LYS M 260      63.627  86.238  90.289  0.00  0.00      MON1  
ATOM   4142  HD1 LYS M 260      64.593  85.894  90.715  0.00  0.00      MON1  
ATOM   4143  HD2 LYS M 260      62.947  86.471  91.140  0.00  0.00      MON1  
ATOM   4144  CE  LYS M 260      63.912  87.485  89.468  0.00  0.00      MON1  
ATOM   4145  HE1 LYS M 260      63.037  87.932  88.985  0.00  0.00      MON1  
ATOM   4146  HE2 LYS M 260      64.667  87.224  88.690  0.00  0.00      MON1  
ATOM   4147  NZ  LYS M 260      64.520  88.490  90.348  0.00  0.00      MON1  
ATOM   4148  HZ1 LYS M 260      65.406  88.071  90.724  0.00  0.00      MON1  
ATOM   4149  HZ2 LYS M 260      63.877  88.633  91.159  0.00  0.00      MON1  
ATOM   4150  HZ3 LYS M 260      64.711  89.385  89.865  0.00  0.00      MON1  
ATOM   4151  C   LYS M 260      63.876  82.329  92.003  0.00  0.00      MON1  
ATOM   4152  O   LYS M 260      63.917  82.681  93.179  0.00  0.00      MON1  
ATOM   4153  N   ILE M 261      63.566  81.075  91.644  0.00  0.00      MON1  
ATOM   4154  HN  ILE M 261      63.528  80.821  90.674  0.00  0.00      MON1  
ATOM   4155  CA  ILE M 261      63.295  80.047  92.617  0.00  0.00      MON1  
ATOM   4156  HA  ILE M 261      62.490  80.376  93.259  0.00  0.00      MON1  
ATOM   4157  CB  ILE M 261      62.919  78.740  91.966  0.00  0.00      MON1  
ATOM   4158  HB  ILE M 261      63.719  78.400  91.266  0.00  0.00      MON1  
ATOM   4159  CG2 ILE M 261      62.728  77.665  93.060  0.00  0.00      MON1  
ATOM   4160 HG21 ILE M 261      62.048  78.018  93.864  0.00  0.00      MON1  
ATOM   4161 HG22 ILE M 261      63.709  77.397  93.501  0.00  0.00      MON1  
ATOM   4162 HG23 ILE M 261      62.328  76.721  92.646  0.00  0.00      MON1  
ATOM   4163  CG1 ILE M 261      61.641  78.967  91.157  0.00  0.00      MON1  
ATOM   4164 HG11 ILE M 261      61.696  79.837  90.485  0.00  0.00      MON1  
ATOM   4165 HG12 ILE M 261      60.824  79.205  91.881  0.00  0.00      MON1  
ATOM   4166  CD  ILE M 261      61.264  77.763  90.381  0.00  0.00      MON1  
ATOM   4167  HD1 ILE M 261      61.022  76.959  91.090  0.00  0.00      MON1  
ATOM   4168  HD2 ILE M 261      62.121  77.484  89.727  0.00  0.00      MON1  
ATOM   4169  HD3 ILE M 261      60.371  77.960  89.747  0.00  0.00      MON1  
ATOM   4170  C   ILE M 261      64.487  79.813  93.487  0.00  0.00      MON1  
ATOM   4171  O   ILE M 261      64.376  79.752  94.706  0.00  0.00      MON1  
ATOM   4172  N   HSE M 262      65.676  79.725  92.868  0.00  0.00      MON1  
ATOM   4173  HN  HSE M 262      65.729  79.776  91.868  0.00  0.00      MON1  
ATOM   4174  CA  HSE M 262      66.907  79.501  93.585  0.00  0.00      MON1  
ATOM   4175  HA  HSE M 262      66.799  78.588  94.156  0.00  0.00      MON1  
ATOM   4176  CB  HSE M 262      68.120  79.372  92.637  0.00  0.00      MON1  
ATOM   4177  HB1 HSE M 262      68.269  80.310  92.066  0.00  0.00      MON1  
ATOM   4178  HB2 HSE M 262      67.915  78.576  91.893  0.00  0.00      MON1  
ATOM   4179  ND1 HSE M 262      69.728  77.688  93.596  0.00  0.00      MON1  
ATOM   4180  CG  HSE M 262      69.405  79.009  93.345  0.00  0.00      MON1  
ATOM   4181  CE1 HSE M 262      70.914  77.714  94.188  0.00  0.00      MON1  
ATOM   4182  HE1 HSE M 262      71.445  76.835  94.565  0.00  0.00      MON1  
ATOM   4183  NE2 HSE M 262      71.373  78.976  94.326  0.00  0.00      MON1  
ATOM   4184  HE2 HSE M 262      72.204  79.256  94.809  0.00  0.00      MON1  
ATOM   4185  CD2 HSE M 262      70.415  79.808  93.782  0.00  0.00      MON1  
ATOM   4186  HD2 HSE M 262      70.495  80.885  93.752  0.00  0.00      MON1  
ATOM   4187  C   HSE M 262      67.191  80.620  94.545  0.00  0.00      MON1  
ATOM   4188  O   HSE M 262      67.533  80.391  95.703  0.00  0.00      MON1  
ATOM   4189  N   GLU M 263      67.023  81.874  94.089  0.00  0.00      MON1  
ATOM   4190  HN  GLU M 263      66.770  82.043  93.129  0.00  0.00      MON1  
ATOM   4191  CA  GLU M 263      67.253  83.029  94.920  0.00  0.00      MON1  
ATOM   4192  HA  GLU M 263      68.257  82.973  95.317  0.00  0.00      MON1  
ATOM   4193  CB  GLU M 263      67.088  84.329  94.134  0.00  0.00      MON1  
ATOM   4194  HB1 GLU M 263      67.179  85.211  94.811  0.00  0.00      MON1  
ATOM   4195  HB2 GLU M 263      66.071  84.345  93.672  0.00  0.00      MON1  
ATOM   4196  CG  GLU M 263      68.150  84.426  93.047  0.00  0.00      MON1  
ATOM   4197  HG1 GLU M 263      68.159  83.556  92.370  0.00  0.00      MON1  
ATOM   4198  HG2 GLU M 263      69.157  84.486  93.517  0.00  0.00      MON1  
ATOM   4199  CD  GLU M 263      67.887  85.641  92.234  0.00  0.00      MON1  
ATOM   4200  OE1 GLU M 263      66.766  85.860  91.683  0.00  0.00      MON1  
ATOM   4201  OE2 GLU M 263      68.892  86.381  92.186  0.00  0.00      MON1  
ATOM   4202  C   GLU M 263      66.316  83.057  96.087  0.00  0.00      MON1  
ATOM   4203  O   GLU M 263      66.710  83.382  97.206  0.00  0.00      MON1  
ATOM   4204  N   HSE M 264      65.042  82.692  95.837  0.00  0.00      MON1  
ATOM   4205  HN  HSE M 264      64.767  82.451  94.902  0.00  0.00      MON1  
ATOM   4206  CA  HSE M 264      64.037  82.595  96.870  0.00  0.00      MON1  
ATOM   4207  HA  HSE M 264      63.965  83.545  97.380  0.00  0.00      MON1  
ATOM   4208  CB  HSE M 264      62.660  82.199  96.279  0.00  0.00      MON1  
ATOM   4209  HB1 HSE M 264      62.729  81.244  95.720  0.00  0.00      MON1  
ATOM   4210  HB2 HSE M 264      62.358  82.983  95.555  0.00  0.00      MON1  
ATOM   4211  ND1 HSE M 264      61.269  80.839  97.887  0.00  0.00      MON1  
ATOM   4212  CG  HSE M 264      61.559  82.058  97.303  0.00  0.00      MON1  
ATOM   4213  CE1 HSE M 264      60.254  81.068  98.705  0.00  0.00      MON1  
ATOM   4214  HE1 HSE M 264      59.818  80.326  99.378  0.00  0.00      MON1  
ATOM   4215  NE2 HSE M 264      59.854  82.358  98.655  0.00  0.00      MON1  
ATOM   4216  HE2 HSE M 264      59.168  82.792  99.239  0.00  0.00      MON1  
ATOM   4217  CD2 HSE M 264      60.681  82.993  97.752  0.00  0.00      MON1  
ATOM   4218  HD2 HSE M 264      60.600  84.042  97.511  0.00  0.00      MON1  
ATOM   4219  C   HSE M 264      64.428  81.581  97.903  0.00  0.00      MON1  
ATOM   4220  O   HSE M 264      64.436  81.857  99.097  0.00  0.00      MON1  
ATOM   4221  N   ILE M 265      64.842  80.395  97.446  0.00  0.00      MON1  
ATOM   4222  HN  ILE M 265      64.808  80.176  96.467  0.00  0.00      MON1  
ATOM   4223  CA  ILE M 265      65.218  79.334  98.335  0.00  0.00      MON1  
ATOM   4224  HA  ILE M 265      64.400  79.167  99.025  0.00  0.00      MON1  
ATOM   4225  CB  ILE M 265      65.482  78.057  97.603  0.00  0.00      MON1  
ATOM   4226  HB  ILE M 265      66.191  78.254  96.768  0.00  0.00      MON1  
ATOM   4227  CG2 ILE M 265      66.078  76.991  98.548  0.00  0.00      MON1  
ATOM   4228 HG21 ILE M 265      65.320  76.673  99.292  0.00  0.00      MON1  
ATOM   4229 HG22 ILE M 265      66.982  77.301  99.089  0.00  0.00      MON1  
ATOM   4230 HG23 ILE M 265      66.385  76.112  97.951  0.00  0.00      MON1  
ATOM   4231  CG1 ILE M 265      64.166  77.561  97.013  0.00  0.00      MON1  
ATOM   4232 HG11 ILE M 265      63.658  78.328  96.399  0.00  0.00      MON1  
ATOM   4233 HG12 ILE M 265      63.464  77.321  97.847  0.00  0.00      MON1  
ATOM   4234  CD  ILE M 265      64.420  76.322  96.193  0.00  0.00      MON1  
ATOM   4235  HD1 ILE M 265      64.118  75.425  96.775  0.00  0.00      MON1  
ATOM   4236  HD2 ILE M 265      65.494  76.219  95.924  0.00  0.00      MON1  
ATOM   4237  HD3 ILE M 265      63.878  76.433  95.241  0.00  0.00      MON1  
ATOM   4238  C   ILE M 265      66.406  79.660  99.167  0.00  0.00      MON1  
ATOM   4239  O   ILE M 265      66.443  79.316 100.340  0.00  0.00      MON1  
ATOM   4240  N   LEU M 266      67.449  80.307  98.618  0.00  0.00      MON1  
ATOM   4241  HN  LEU M 266      67.468  80.568  97.652  0.00  0.00      MON1  
ATOM   4242  CA  LEU M 266      68.583  80.562  99.474  0.00  0.00      MON1  
ATOM   4243  HA  LEU M 266      68.890  79.626  99.910  0.00  0.00      MON1  
ATOM   4244  CB  LEU M 266      69.741  81.269  98.739  0.00  0.00      MON1  
ATOM   4245  HB1 LEU M 266      70.464  81.703  99.457  0.00  0.00      MON1  
ATOM   4246  HB2 LEU M 266      69.326  82.116  98.147  0.00  0.00      MON1  
ATOM   4247  CG  LEU M 266      70.553  80.374  97.790  0.00  0.00      MON1  
ATOM   4248  HG  LEU M 266      69.879  80.064  96.955  0.00  0.00      MON1  
ATOM   4249  CD1 LEU M 266      71.736  81.169  97.215  0.00  0.00      MON1  
ATOM   4250 HD11 LEU M 266      72.404  81.501  98.038  0.00  0.00      MON1  
ATOM   4251 HD12 LEU M 266      71.375  82.060  96.659  0.00  0.00      MON1  
ATOM   4252 HD13 LEU M 266      72.330  80.534  96.526  0.00  0.00      MON1  
ATOM   4253  CD2 LEU M 266      71.085  79.102  98.461  0.00  0.00      MON1  
ATOM   4254 HD21 LEU M 266      70.437  78.725  99.261  0.00  0.00      MON1  
ATOM   4255 HD22 LEU M 266      72.066  79.315  98.941  0.00  0.00      MON1  
ATOM   4256 HD23 LEU M 266      71.247  78.298  97.711  0.00  0.00      MON1  
ATOM   4257  C   LEU M 266      68.233  81.424 100.651  0.00  0.00      MON1  
ATOM   4258  O   LEU M 266      68.500  81.056 101.792  0.00  0.00      MON1  
ATOM   4259  N   LYS M 267      67.589  82.577 100.409  0.00  0.00      MON1  
ATOM   4260  HN  LYS M 267      67.284  82.827  99.490  0.00  0.00      MON1  
ATOM   4261  CA  LYS M 267      67.293  83.450 101.517  0.00  0.00      MON1  
ATOM   4262  HA  LYS M 267      68.176  83.535 102.137  0.00  0.00      MON1  
ATOM   4263  CB  LYS M 267      66.922  84.867 101.049  0.00  0.00      MON1  
ATOM   4264  HB1 LYS M 267      66.495  85.465 101.884  0.00  0.00      MON1  
ATOM   4265  HB2 LYS M 267      66.145  84.793 100.253  0.00  0.00      MON1  
ATOM   4266  CG  LYS M 267      68.142  85.632 100.531  0.00  0.00      MON1  
ATOM   4267  HG1 LYS M 267      68.698  84.991  99.806  0.00  0.00      MON1  
ATOM   4268  HG2 LYS M 267      68.828  85.845 101.382  0.00  0.00      MON1  
ATOM   4269  CD  LYS M 267      67.755  86.937  99.825  0.00  0.00      MON1  
ATOM   4270  HD1 LYS M 267      67.137  87.557 100.515  0.00  0.00      MON1  
ATOM   4271  HD2 LYS M 267      67.121  86.668  98.948  0.00  0.00      MON1  
ATOM   4272  CE  LYS M 267      68.982  87.726  99.369  0.00  0.00      MON1  
ATOM   4273  HE1 LYS M 267      69.694  87.080  98.838  0.00  0.00      MON1  
ATOM   4274  HE2 LYS M 267      69.506  88.139 100.261  0.00  0.00      MON1  
ATOM   4275  NZ  LYS M 267      68.603  88.861  98.502  0.00  0.00      MON1  
ATOM   4276  HZ1 LYS M 267      67.948  89.494  99.000  0.00  0.00      MON1  
ATOM   4277  HZ2 LYS M 267      68.160  88.507  97.631  0.00  0.00      MON1  
ATOM   4278  HZ3 LYS M 267      69.481  89.374  98.258  0.00  0.00      MON1  
ATOM   4279  C   LYS M 267      66.221  82.919 102.420  0.00  0.00      MON1  
ATOM   4280  O   LYS M 267      66.406  82.826 103.630  0.00  0.00      MON1  
ATOM   4281  N   HSE M 268      65.079  82.534 101.829  0.00  0.00      MON1  
ATOM   4282  HN  HSE M 268      64.948  82.581 100.833  0.00  0.00      MON1  
ATOM   4283  CA  HSE M 268      63.925  82.093 102.572  0.00  0.00      MON1  
ATOM   4284  HA  HSE M 268      63.804  82.731 103.437  0.00  0.00      MON1  
ATOM   4285  CB  HSE M 268      62.646  82.191 101.714  0.00  0.00      MON1  
ATOM   4286  HB1 HSE M 268      61.788  81.757 102.273  0.00  0.00      MON1  
ATOM   4287  HB2 HSE M 268      62.737  81.629 100.764  0.00  0.00      MON1  
ATOM   4288  ND1 HSE M 268      62.958  84.411 100.507  0.00  0.00      MON1  
ATOM   4289  CG  HSE M 268      62.298  83.631 101.440  0.00  0.00      MON1  
ATOM   4290  CE1 HSE M 268      62.378  85.598 100.568  0.00  0.00      MON1  
ATOM   4291  HE1 HSE M 268      62.656  86.443  99.942  0.00  0.00      MON1  
ATOM   4292  NE2 HSE M 268      61.383  85.630 101.475  0.00  0.00      MON1  
ATOM   4293  HE2 HSE M 268      60.674  86.342 101.576  0.00  0.00      MON1  
ATOM   4294  CD2 HSE M 268      61.345  84.380 102.045  0.00  0.00      MON1  
ATOM   4295  HD2 HSE M 268      60.779  84.158 102.926  0.00  0.00      MON1  
ATOM   4296  C   HSE M 268      64.082  80.696 103.106  0.00  0.00      MON1  
ATOM   4297  O   HSE M 268      63.534  80.347 104.148  0.00  0.00      MON1  
ATOM   4298  N   GLY M 269      64.882  79.861 102.441  0.00  0.00      MON1  
ATOM   4299  HN  GLY M 269      65.367  80.154 101.614  0.00  0.00      MON1  
ATOM   4300  CA  GLY M 269      64.974  78.451 102.745  0.00  0.00      MON1  
ATOM   4301  HA1 GLY M 269      64.745  78.256 103.782  0.00  0.00      MON1  
ATOM   4302  HA2 GLY M 269      65.954  78.118 102.448  0.00  0.00      MON1  
ATOM   4303  C   GLY M 269      63.967  77.748 101.902  0.00  0.00      MON1  
ATOM   4304  O   GLY M 269      63.160  78.375 101.218  0.00  0.00      MON1  
ATOM   4305  N   ASP M 270      63.972  76.409 101.909  0.00  0.00      MON1  
ATOM   4306  HN  ASP M 270      64.578  75.867 102.477  0.00  0.00      MON1  
ATOM   4307  CA  ASP M 270      62.957  75.702 101.167  0.00  0.00      MON1  
ATOM   4308  HA  ASP M 270      62.514  76.335 100.406  0.00  0.00      MON1  
ATOM   4309  CB  ASP M 270      63.497  74.450 100.471  0.00  0.00      MON1  
ATOM   4310  HB1 ASP M 270      63.659  73.649 101.212  0.00  0.00      MON1  
ATOM   4311  HB2 ASP M 270      64.442  74.726  99.988  0.00  0.00      MON1  
ATOM   4312  CG  ASP M 270      62.513  73.938  99.433  0.00  0.00      MON1  
ATOM   4313  OD1 ASP M 270      61.305  73.801  99.755  0.00  0.00      MON1  
ATOM   4314  OD2 ASP M 270      62.950  73.631  98.292  0.00  0.00      MON1  
ATOM   4315  C   ASP M 270      61.886  75.324 102.146  0.00  0.00      MON1  
ATOM   4316  O   ASP M 270      62.032  74.389 102.936  0.00  0.00      MON1  
ATOM   4317  N   ILE M 271      60.783  76.072 102.128  0.00  0.00      MON1  
ATOM   4318  HN  ILE M 271      60.681  76.823 101.482  0.00  0.00      MON1  
ATOM   4319  CA  ILE M 271      59.682  75.805 103.012  0.00  0.00      MON1  
ATOM   4320  HA  ILE M 271      59.859  74.917 103.599  0.00  0.00      MON1  
ATOM   4321  CB  ILE M 271      59.361  76.945 103.954  0.00  0.00      MON1  
ATOM   4322  HB  ILE M 271      59.151  77.875 103.371  0.00  0.00      MON1  
ATOM   4323  CG2 ILE M 271      58.098  76.574 104.769  0.00  0.00      MON1  
ATOM   4324 HG21 ILE M 271      58.238  75.610 105.301  0.00  0.00      MON1  
ATOM   4325 HG22 ILE M 271      57.185  76.516 104.141  0.00  0.00      MON1  
ATOM   4326 HG23 ILE M 271      57.883  77.352 105.531  0.00  0.00      MON1  
ATOM   4327  CG1 ILE M 271      60.576  77.239 104.862  0.00  0.00      MON1  
ATOM   4328 HG11 ILE M 271      61.452  77.503 104.226  0.00  0.00      MON1  
ATOM   4329 HG12 ILE M 271      60.839  76.321 105.432  0.00  0.00      MON1  
ATOM   4330  CD  ILE M 271      60.340  78.396 105.840  0.00  0.00      MON1  
ATOM   4331  HD1 ILE M 271      59.559  78.139 106.583  0.00  0.00      MON1  
ATOM   4332  HD2 ILE M 271      60.025  79.310 105.291  0.00  0.00      MON1  
ATOM   4333  HD3 ILE M 271      61.272  78.630 106.397  0.00  0.00      MON1  
ATOM   4334  C   ILE M 271      58.497  75.540 102.158  0.00  0.00      MON1  
ATOM   4335  O   ILE M 271      58.244  76.255 101.189  0.00  0.00      MON1  
ATOM   4336  N   ARG M 272      57.733  74.494 102.504  0.00  0.00      MON1  
ATOM   4337  HN  ARG M 272      57.915  73.943 103.311  0.00  0.00      MON1  
ATOM   4338  CA  ARG M 272      56.592  74.149 101.718  0.00  0.00      MON1  
ATOM   4339  HA  ARG M 272      56.400  74.937 101.026  0.00  0.00      MON1  
ATOM   4340  CB  ARG M 272      56.818  72.872 100.901  0.00  0.00      MON1  
ATOM   4341  HB1 ARG M 272      55.877  72.578 100.385  0.00  0.00      MON1  
ATOM   4342  HB2 ARG M 272      57.104  72.034 101.559  0.00  0.00      MON1  
ATOM   4343  CG  ARG M 272      57.927  73.067  99.858  0.00  0.00      MON1  
ATOM   4344  HG1 ARG M 272      58.825  73.521 100.336  0.00  0.00      MON1  
ATOM   4345  HG2 ARG M 272      57.562  73.788  99.089  0.00  0.00      MON1  
ATOM   4346  CD  ARG M 272      58.378  71.770  99.195  0.00  0.00      MON1  
ATOM   4347  HD1 ARG M 272      57.528  71.262  98.686  0.00  0.00      MON1  
ATOM   4348  HD2 ARG M 272      58.817  71.094  99.965  0.00  0.00      MON1  
ATOM   4349  NE  ARG M 272      59.409  72.142  98.179  0.00  0.00      MON1  
ATOM   4350  HE  ARG M 272      59.862  73.034  98.304  0.00  0.00      MON1  
ATOM   4351  CZ  ARG M 272      60.167  71.239  97.566  0.00  0.00      MON1  
ATOM   4352  NH1 ARG M 272      60.124  69.961  97.904  0.00  0.00      MON1  
ATOM   4353 HH11 ARG M 272      59.476  69.661  98.590  0.00  0.00      MON1  
ATOM   4354 HH12 ARG M 272      60.702  69.292  97.452  0.00  0.00      MON1  
ATOM   4355  NH2 ARG M 272      61.032  71.631  96.651  0.00  0.00      MON1  
ATOM   4356 HH21 ARG M 272      61.393  72.548  96.843  0.00  0.00      MON1  
ATOM   4357 HH22 ARG M 272      61.678  70.946  96.351  0.00  0.00      MON1  
ATOM   4358  C   ARG M 272      55.361  74.054 102.550  0.00  0.00      MON1  
ATOM   4359  O   ARG M 272      55.401  73.678 103.721  0.00  0.00      MON1  
ATOM   4360  N   LYS M 273      54.237  74.422 101.934  0.00  0.00      MON1  
ATOM   4361  HN  LYS M 273      54.277  74.764 100.994  0.00  0.00      MON1  
ATOM   4362  CA  LYS M 273      52.935  74.276 102.512  0.00  0.00      MON1  
ATOM   4363  HA  LYS M 273      52.991  73.736 103.449  0.00  0.00      MON1  
ATOM   4364  CB  LYS M 273      52.241  75.620 102.715  0.00  0.00      MON1  
ATOM   4365  HB1 LYS M 273      52.272  76.257 101.807  0.00  0.00      MON1  
ATOM   4366  HB2 LYS M 273      52.931  76.006 103.472  0.00  0.00      MON1  
ATOM   4367  CG  LYS M 273      50.826  75.498 103.296  0.00  0.00      MON1  
ATOM   4368  HG1 LYS M 273      50.851  74.810 104.171  0.00  0.00      MON1  
ATOM   4369  HG2 LYS M 273      50.153  75.046 102.530  0.00  0.00      MON1  
ATOM   4370  CD  LYS M 273      50.187  76.823 103.720  0.00  0.00      MON1  
ATOM   4371  HD1 LYS M 273      50.160  77.509 102.849  0.00  0.00      MON1  
ATOM   4372  HD2 LYS M 273      50.809  77.261 104.529  0.00  0.00      MON1  
ATOM   4373  CE  LYS M 273      48.768  76.635 104.251  0.00  0.00      MON1  
ATOM   4374  HE1 LYS M 273      48.793  75.833 105.020  0.00  0.00      MON1  
ATOM   4375  HE2 LYS M 273      48.054  76.355 103.449  0.00  0.00      MON1  
ATOM   4376  NZ  LYS M 273      48.305  77.874 104.911  0.00  0.00      MON1  
ATOM   4377  HZ1 LYS M 273      48.224  78.643 104.223  0.00  0.00      MON1  
ATOM   4378  HZ2 LYS M 273      48.996  78.140 105.644  0.00  0.00      MON1  
ATOM   4379  HZ3 LYS M 273      47.380  77.715 105.390  0.00  0.00      MON1  
ATOM   4380  C   LYS M 273      52.107  73.482 101.583  0.00  0.00      MON1  
ATOM   4381  O   LYS M 273      52.181  73.659 100.369  0.00  0.00      MON1  
ATOM   4382  N   THR M 274      51.287  72.588 102.137  0.00  0.00      MON1  
ATOM   4383  HN  THR M 274      51.306  72.389 103.109  0.00  0.00      MON1  
ATOM   4384  CA  THR M 274      50.409  71.787 101.330  0.00  0.00      MON1  
ATOM   4385  HA  THR M 274      50.936  71.468 100.442  0.00  0.00      MON1  
ATOM   4386  CB  THR M 274      49.889  70.577 102.062  0.00  0.00      MON1  
ATOM   4387  HB  THR M 274      49.282  70.869 102.951  0.00  0.00      MON1  
ATOM   4388  OG1 THR M 274      50.972  69.780 102.523  0.00  0.00      MON1  
ATOM   4389  HG1 THR M 274      51.594  69.734 101.752  0.00  0.00      MON1  
ATOM   4390  CG2 THR M 274      49.038  69.747 101.103  0.00  0.00      MON1  
ATOM   4391 HG21 THR M 274      49.610  69.641 100.157  0.00  0.00      MON1  
ATOM   4392 HG22 THR M 274      48.055  70.213 100.887  0.00  0.00      MON1  
ATOM   4393 HG23 THR M 274      48.857  68.735 101.521  0.00  0.00      MON1  
ATOM   4394  C   THR M 274      49.230  72.589 100.885  0.00  0.00      MON1  
ATOM   4395  O   THR M 274      48.539  73.209 101.691  0.00  0.00      MON1  
ATOM   4396  N   THR M 275      48.963  72.590  99.578  0.00  0.00      MON1  
ATOM   4397  HN  THR M 275      49.575  72.129  98.926  0.00  0.00      MON1  
ATOM   4398  CA  THR M 275      47.809  73.263  99.037  0.00  0.00      MON1  
ATOM   4399  HA  THR M 275      47.200  73.675  99.829  0.00  0.00      MON1  
ATOM   4400  CB  THR M 275      48.160  74.387  98.087  0.00  0.00      MON1  
ATOM   4401  HB  THR M 275      47.228  74.897  97.742  0.00  0.00      MON1  
ATOM   4402  OG1 THR M 275      48.863  73.937  96.941  0.00  0.00      MON1  
ATOM   4403  HG1 THR M 275      49.586  73.369  97.264  0.00  0.00      MON1  
ATOM   4404  CG2 THR M 275      49.035  75.407  98.827  0.00  0.00      MON1  
ATOM   4405 HG21 THR M 275      50.025  74.970  99.083  0.00  0.00      MON1  
ATOM   4406 HG22 THR M 275      48.546  75.740  99.766  0.00  0.00      MON1  
ATOM   4407 HG23 THR M 275      49.217  76.291  98.182  0.00  0.00      MON1  
ATOM   4408  C   THR M 275      46.984  72.240  98.326  0.00  0.00      MON1  
ATOM   4409  O   THR M 275      47.462  71.500  97.465  0.00  0.00      MON1  
ATOM   4410  N   HSE M 276      45.695  72.144  98.680  0.00  0.00      MON1  
ATOM   4411  HN  HSE M 276      45.296  72.662  99.430  0.00  0.00      MON1  
ATOM   4412  CA  HSE M 276      44.838  71.215  97.991  0.00  0.00      MON1  
ATOM   4413  HA  HSE M 276      45.396  70.343  97.666  0.00  0.00      MON1  
ATOM   4414  CB  HSE M 276      43.648  70.734  98.841  0.00  0.00      MON1  
ATOM   4415  HB1 HSE M 276      43.108  69.926  98.302  0.00  0.00      MON1  
ATOM   4416  HB2 HSE M 276      42.932  71.561  99.039  0.00  0.00      MON1  
ATOM   4417  ND1 HSE M 276      43.842  70.842 101.364  0.00  0.00      MON1  
ATOM   4418  CG  HSE M 276      44.087  70.177 100.168  0.00  0.00      MON1  
ATOM   4419  CE1 HSE M 276      44.345  70.051 102.304  0.00  0.00      MON1  
ATOM   4420  HE1 HSE M 276      44.323  70.216 103.382  0.00  0.00      MON1  
ATOM   4421  NE2 HSE M 276      44.887  68.930 101.789  0.00  0.00      MON1  
ATOM   4422  HE2 HSE M 276      45.409  68.221 102.273  0.00  0.00      MON1  
ATOM   4423  CD2 HSE M 276      44.718  69.001 100.425  0.00  0.00      MON1  
ATOM   4424  HD2 HSE M 276      45.092  68.257  99.734  0.00  0.00      MON1  
ATOM   4425  C   HSE M 276      44.318  71.940  96.793  0.00  0.00      MON1  
ATOM   4426  O   HSE M 276      43.675  72.981  96.909  0.00  0.00      MON1  
ATOM   4427  N   LEU M 277      44.600  71.433  95.602  0.00  0.00      MON1  
ATOM   4428  HN  LEU M 277      45.125  70.577  95.507  0.00  0.00      MON1  
ATOM   4429  CA  LEU M 277      44.191  72.107  94.408  0.00  0.00      MON1  
ATOM   4430  HA  LEU M 277      43.669  73.029  94.624  0.00  0.00      MON1  
ATOM   4431  CB  LEU M 277      45.355  72.411  93.460  0.00  0.00      MON1  
ATOM   4432  HB1 LEU M 277      44.974  72.939  92.554  0.00  0.00      MON1  
ATOM   4433  HB2 LEU M 277      45.837  71.460  93.140  0.00  0.00      MON1  
ATOM   4434  CG  LEU M 277      46.431  73.295  94.095  0.00  0.00      MON1  
ATOM   4435  HG  LEU M 277      46.958  72.697  94.882  0.00  0.00      MON1  
ATOM   4436  CD1 LEU M 277      47.439  73.691  93.026  0.00  0.00      MON1  
ATOM   4437 HD11 LEU M 277      47.037  74.523  92.408  0.00  0.00      MON1  
ATOM   4438 HD12 LEU M 277      47.624  72.848  92.347  0.00  0.00      MON1  
ATOM   4439 HD13 LEU M 277      48.384  73.999  93.512  0.00  0.00      MON1  
ATOM   4440  CD2 LEU M 277      45.852  74.548  94.762  0.00  0.00      MON1  
ATOM   4441 HD21 LEU M 277      45.163  74.301  95.589  0.00  0.00      MON1  
ATOM   4442 HD22 LEU M 277      45.310  75.167  94.018  0.00  0.00      MON1  
ATOM   4443 HD23 LEU M 277      46.685  75.134  95.202  0.00  0.00      MON1  
ATOM   4444  C   LEU M 277      43.231  71.244  93.691  0.00  0.00      MON1  
ATOM   4445  O   LEU M 277      43.362  70.027  93.661  0.00  0.00      MON1  
ATOM   4446  N   ARG M 278      42.224  71.877  93.080  0.00  0.00      MON1  
ATOM   4447  HN  ARG M 278      42.102  72.863  93.146  0.00  0.00      MON1  
ATOM   4448  CA  ARG M 278      41.349  71.197  92.182  0.00  0.00      MON1  
ATOM   4449  HA  ARG M 278      41.358  70.191  92.420  0.00  0.00      MON1  
ATOM   4450  CB  ARG M 278      39.883  71.610  92.309  0.00  0.00      MON1  
ATOM   4451  HB1 ARG M 278      39.275  71.135  91.511  0.00  0.00      MON1  
ATOM   4452  HB2 ARG M 278      39.817  72.708  92.149  0.00  0.00      MON1  
ATOM   4453  CG  ARG M 278      39.285  71.258  93.682  0.00  0.00      MON1  
ATOM   4454  HG1 ARG M 278      38.401  71.912  93.870  0.00  0.00      MON1  
ATOM   4455  HG2 ARG M 278      40.030  71.479  94.477  0.00  0.00      MON1  
ATOM   4456  CD  ARG M 278      38.806  69.810  93.763  0.00  0.00      MON1  
ATOM   4457  HD1 ARG M 278      39.587  69.121  93.376  0.00  0.00      MON1  
ATOM   4458  HD2 ARG M 278      37.890  69.712  93.132  0.00  0.00      MON1  
ATOM   4459  NE  ARG M 278      38.564  69.474  95.206  0.00  0.00      MON1  
ATOM   4460  HE  ARG M 278      39.068  69.962  95.918  0.00  0.00      MON1  
ATOM   4461  CZ  ARG M 278      37.636  68.611  95.607  0.00  0.00      MON1  
ATOM   4462  NH1 ARG M 278      36.777  68.095  94.743  0.00  0.00      MON1  
ATOM   4463 HH11 ARG M 278      36.855  68.371  93.793  0.00  0.00      MON1  
ATOM   4464 HH12 ARG M 278      36.133  67.390  95.020  0.00  0.00      MON1  
ATOM   4465  NH2 ARG M 278      37.573  68.257  96.880  0.00  0.00      MON1  
ATOM   4466 HH21 ARG M 278      38.229  68.666  97.509  0.00  0.00      MON1  
ATOM   4467 HH22 ARG M 278      36.986  67.509  97.163  0.00  0.00      MON1  
ATOM   4468  C   ARG M 278      41.850  71.457  90.801  0.00  0.00      MON1  
ATOM   4469  O   ARG M 278      41.597  72.524  90.255  0.00  0.00      MON1  
ATOM   4470  N   ILE M 279      42.595  70.521  90.202  0.00  0.00      MON1  
ATOM   4471  HN  ILE M 279      42.766  69.643  90.646  0.00  0.00      MON1  
ATOM   4472  CA  ILE M 279      43.182  70.782  88.906  0.00  0.00      MON1  
ATOM   4473  HA  ILE M 279      43.021  71.803  88.582  0.00  0.00      MON1  
ATOM   4474  CB  ILE M 279      44.658  70.474  88.862  0.00  0.00      MON1  
ATOM   4475  HB  ILE M 279      44.863  69.403  89.108  0.00  0.00      MON1  
ATOM   4476  CG2 ILE M 279      45.146  70.731  87.412  0.00  0.00      MON1  
ATOM   4477 HG21 ILE M 279      44.612  71.606  87.002  0.00  0.00      MON1  
ATOM   4478 HG22 ILE M 279      44.881  69.868  86.769  0.00  0.00      MON1  
ATOM   4479 HG23 ILE M 279      46.232  70.878  87.290  0.00  0.00      MON1  
ATOM   4480  CG1 ILE M 279      45.297  71.310  89.968  0.00  0.00      MON1  
ATOM   4481 HG11 ILE M 279      45.195  70.783  90.945  0.00  0.00      MON1  
ATOM   4482 HG12 ILE M 279      44.722  72.267  90.077  0.00  0.00      MON1  
ATOM   4483  CD  ILE M 279      46.699  71.663  89.674  0.00  0.00      MON1  
ATOM   4484  HD1 ILE M 279      46.555  72.493  88.950  0.00  0.00      MON1  
ATOM   4485  HD2 ILE M 279      47.294  71.090  88.952  0.00  0.00      MON1  
ATOM   4486  HD3 ILE M 279      47.215  72.209  90.486  0.00  0.00      MON1  
ATOM   4487  C   ILE M 279      42.571  69.889  87.925  0.00  0.00      MON1  
ATOM   4488  O   ILE M 279      42.822  68.710  87.978  0.00  0.00      MON1  
ATOM   4489  N   ALA M 280      41.770  70.369  86.973  0.00  0.00      MON1  
ATOM   4490  HN  ALA M 280      41.525  71.329  86.868  0.00  0.00      MON1  
ATOM   4491  CA  ALA M 280      41.203  69.417  86.045  0.00  0.00      MON1  
ATOM   4492  HA  ALA M 280      40.862  69.799  85.138  0.00  0.00      MON1  
ATOM   4493  CB  ALA M 280      42.174  68.650  85.179  0.00  0.00      MON1  
ATOM   4494  HB1 ALA M 280      42.736  67.913  85.784  0.00  0.00      MON1  
ATOM   4495  HB2 ALA M 280      42.888  69.334  84.672  0.00  0.00      MON1  
ATOM   4496  HB3 ALA M 280      41.642  68.037  84.418  0.00  0.00      MON1  
ATOM   4497  C   ALA M 280      40.268  68.471  86.712  0.00  0.00      MON1  
ATOM   4498  O   ALA M 280      39.933  67.438  86.181  0.00  0.00      MON1  
ATOM   4499  N   GLY M 281      39.873  68.761  87.946  0.00  0.00      MON1  
ATOM   4500  HN  GLY M 281      40.163  69.606  88.382  0.00  0.00      MON1  
ATOM   4501  CA  GLY M 281      38.830  67.996  88.513  0.00  0.00      MON1  
ATOM   4502  HA1 GLY M 281      38.285  67.394  87.794  0.00  0.00      MON1  
ATOM   4503  HA2 GLY M 281      38.490  68.633  89.239  0.00  0.00      MON1  
ATOM   4504  C   GLY M 281      39.070  67.084  89.338  0.00  0.00      MON1  
ATOM   4505  O   GLY M 281      38.268  66.166  89.307  0.00  0.00      MON1  
ATOM   4506  N   GLU M 282      40.128  67.370  90.083  0.00  0.00      MON1  
ATOM   4507  HN  GLU M 282      40.632  68.203  89.882  0.00  0.00      MON1  
ATOM   4508  CA  GLU M 282      40.720  66.528  91.022  0.00  0.00      MON1  
ATOM   4509  HA  GLU M 282      39.924  66.003  91.519  0.00  0.00      MON1  
ATOM   4510  CB  GLU M 282      41.980  65.918  90.424  0.00  0.00      MON1  
ATOM   4511  HB1 GLU M 282      41.513  65.754  89.477  0.00  0.00      MON1  
ATOM   4512  HB2 GLU M 282      42.571  65.240  91.069  0.00  0.00      MON1  
ATOM   4513  CG  GLU M 282      43.177  66.417  89.706  0.00  0.00      MON1  
ATOM   4514  HG1 GLU M 282      43.766  67.156  90.280  0.00  0.00      MON1  
ATOM   4515  HG2 GLU M 282      42.844  66.828  88.754  0.00  0.00      MON1  
ATOM   4516  CD  GLU M 282      44.116  65.309  89.187  0.00  0.00      MON1  
ATOM   4517  OE1 GLU M 282      44.509  64.393  89.960  0.00  0.00      MON1  
ATOM   4518  OE2 GLU M 282      44.396  65.336  87.949  0.00  0.00      MON1  
ATOM   4519  C   GLU M 282      41.254  67.073  92.156  0.00  0.00      MON1  
ATOM   4520  O   GLU M 282      41.575  68.217  92.096  0.00  0.00      MON1  
ATOM   4521  N   GLU M 283      41.412  66.314  93.237  0.00  0.00      MON1  
ATOM   4522  HN  GLU M 283      41.102  65.378  93.317  0.00  0.00      MON1  
ATOM   4523  CA  GLU M 283      42.055  66.844  94.379  0.00  0.00      MON1  
ATOM   4524  HA  GLU M 283      41.948  67.921  94.424  0.00  0.00      MON1  
ATOM   4525  CB  GLU M 283      41.433  66.250  95.642  0.00  0.00      MON1  
ATOM   4526  HB1 GLU M 283      41.679  65.172  95.761  0.00  0.00      MON1  
ATOM   4527  HB2 GLU M 283      40.326  66.305  95.501  0.00  0.00      MON1  
ATOM   4528  CG  GLU M 283      41.745  67.089  96.893  0.00  0.00      MON1  
ATOM   4529  HG1 GLU M 283      40.839  67.162  97.532  0.00  0.00      MON1  
ATOM   4530  HG2 GLU M 283      42.079  68.115  96.636  0.00  0.00      MON1  
ATOM   4531  CD  GLU M 283      42.808  66.409  97.732  0.00  0.00      MON1  
ATOM   4532  OE1 GLU M 283      42.574  65.229  98.115  0.00  0.00      MON1  
ATOM   4533  OE2 GLU M 283      43.800  67.084  98.089  0.00  0.00      MON1  
ATOM   4534  C   GLU M 283      43.512  66.513  94.245  0.00  0.00      MON1  
ATOM   4535  O   GLU M 283      43.942  65.369  94.383  0.00  0.00      MON1  
ATOM   4536  N   LYS M 284      44.300  67.531  93.908  0.00  0.00      MON1  
ATOM   4537  HN  LYS M 284      43.925  68.461  93.824  0.00  0.00      MON1  
ATOM   4538  CA  LYS M 284      45.708  67.379  93.730  0.00  0.00      MON1  
ATOM   4539  HA  LYS M 284      45.996  66.337  93.788  0.00  0.00      MON1  
ATOM   4540  CB  LYS M 284      46.207  67.965  92.399  0.00  0.00      MON1  
ATOM   4541  HB1 LYS M 284      45.907  69.034  92.344  0.00  0.00      MON1  
ATOM   4542  HB2 LYS M 284      45.668  67.414  91.593  0.00  0.00      MON1  
ATOM   4543  CG  LYS M 284      47.725  67.780  92.205  0.00  0.00      MON1  
ATOM   4544  HG1 LYS M 284      47.992  66.746  92.536  0.00  0.00      MON1  
ATOM   4545  HG2 LYS M 284      48.292  68.469  92.870  0.00  0.00      MON1  
ATOM   4546  CD  LYS M 284      48.183  67.914  90.755  0.00  0.00      MON1  
ATOM   4547  HD1 LYS M 284      47.707  67.073  90.191  0.00  0.00      MON1  
ATOM   4548  HD2 LYS M 284      49.289  67.761  90.695  0.00  0.00      MON1  
ATOM   4549  CE  LYS M 284      47.743  69.191  90.162  0.00  0.00      MON1  
ATOM   4550  HE1 LYS M 284      46.662  69.284  90.333  0.00  0.00      MON1  
ATOM   4551  HE2 LYS M 284      47.961  69.232  89.077  0.00  0.00      MON1  
ATOM   4552  NZ  LYS M 284      48.521  70.240  90.842  0.00  0.00      MON1  
ATOM   4553  HZ1 LYS M 284      49.543  70.081  90.680  0.00  0.00      MON1  
ATOM   4554  HZ2 LYS M 284      48.355  70.185  91.868  0.00  0.00      MON1  
ATOM   4555  HZ3 LYS M 284      48.268  71.185  90.500  0.00  0.00      MON1  
ATOM   4556  C   LYS M 284      46.379  68.093  94.849  0.00  0.00      MON1  
ATOM   4557  O   LYS M 284      45.945  69.148  95.293  0.00  0.00      MON1  
ATOM   4558  N   GLU M 285      47.481  67.529  95.326  0.00  0.00      MON1  
ATOM   4559  HN  GLU M 285      47.775  66.615  95.061  0.00  0.00      MON1  
ATOM   4560  CA  GLU M 285      48.255  68.144  96.357  0.00  0.00      MON1  
ATOM   4561  HA  GLU M 285      47.679  68.862  96.927  0.00  0.00      MON1  
ATOM   4562  CB  GLU M 285      48.794  67.064  97.281  0.00  0.00      MON1  
ATOM   4563  HB1 GLU M 285      49.387  66.347  96.666  0.00  0.00      MON1  
ATOM   4564  HB2 GLU M 285      47.929  66.487  97.688  0.00  0.00      MON1  
ATOM   4565  CG  GLU M 285      49.634  67.587  98.457  0.00  0.00      MON1  
ATOM   4566  HG1 GLU M 285      48.923  68.075  99.146  0.00  0.00      MON1  
ATOM   4567  HG2 GLU M 285      50.444  68.285  98.168  0.00  0.00      MON1  
ATOM   4568  CD  GLU M 285      50.255  66.409  99.184  0.00  0.00      MON1  
ATOM   4569  OE1 GLU M 285      50.138  65.264  98.668  0.00  0.00      MON1  
ATOM   4570  OE2 GLU M 285      50.851  66.609 100.271  0.00  0.00      MON1  
ATOM   4571  C   GLU M 285      49.418  68.824  95.712  0.00  0.00      MON1  
ATOM   4572  O   GLU M 285      50.272  68.185  95.092  0.00  0.00      MON1  
ATOM   4573  N   VAL M 286      49.470  70.152  95.821  0.00  0.00      MON1  
ATOM   4574  HN  VAL M 286      48.781  70.663  96.345  0.00  0.00      MON1  
ATOM   4575  CA  VAL M 286      50.614  70.881  95.344  0.00  0.00      MON1  
ATOM   4576  HA  VAL M 286      51.319  70.241  94.829  0.00  0.00      MON1  
ATOM   4577  CB  VAL M 286      50.260  72.038  94.450  0.00  0.00      MON1  
ATOM   4578  HB  VAL M 286      49.544  72.730  94.944  0.00  0.00      MON1  
ATOM   4579  CG1 VAL M 286      51.533  72.818  94.071  0.00  0.00      MON1  
ATOM   4580 HG11 VAL M 286      52.327  72.129  93.708  0.00  0.00      MON1  
ATOM   4581 HG12 VAL M 286      51.934  73.399  94.928  0.00  0.00      MON1  
ATOM   4582 HG13 VAL M 286      51.311  73.542  93.259  0.00  0.00      MON1  
ATOM   4583  CG2 VAL M 286      49.582  71.433  93.238  0.00  0.00      MON1  
ATOM   4584 HG21 VAL M 286      48.552  71.110  93.509  0.00  0.00      MON1  
ATOM   4585 HG22 VAL M 286      50.170  70.543  92.917  0.00  0.00      MON1  
ATOM   4586 HG23 VAL M 286      49.554  72.194  92.432  0.00  0.00      MON1  
ATOM   4587  C   VAL M 286      51.303  71.423  96.539  0.00  0.00      MON1  
ATOM   4588  O   VAL M 286      50.671  72.012  97.414  0.00  0.00      MON1  
ATOM   4589  N   GLU M 287      52.626  71.248  96.601  0.00  0.00      MON1  
ATOM   4590  HN  GLU M 287      53.157  70.783  95.884  0.00  0.00      MON1  
ATOM   4591  CA  GLU M 287      53.410  71.823  97.656  0.00  0.00      MON1  
ATOM   4592  HA  GLU M 287      52.816  71.950  98.552  0.00  0.00      MON1  
ATOM   4593  CB  GLU M 287      54.647  70.971  97.994  0.00  0.00      MON1  
ATOM   4594  HB1 GLU M 287      55.328  71.532  98.665  0.00  0.00      MON1  
ATOM   4595  HB2 GLU M 287      55.213  70.769  97.058  0.00  0.00      MON1  
ATOM   4596  CG  GLU M 287      54.304  69.623  98.654  0.00  0.00      MON1  
ATOM   4597  HG1 GLU M 287      55.196  68.961  98.663  0.00  0.00      MON1  
ATOM   4598  HG2 GLU M 287      53.487  69.104  98.113  0.00  0.00      MON1  
ATOM   4599  CD  GLU M 287      53.878  69.847 100.096  0.00  0.00      MON1  
ATOM   4600  OE1 GLU M 287      54.777  69.939 100.975  0.00  0.00      MON1  
ATOM   4601  OE2 GLU M 287      52.650  69.940 100.349  0.00  0.00      MON1  
ATOM   4602  C   GLU M 287      53.878  73.166  97.182  0.00  0.00      MON1  
ATOM   4603  O   GLU M 287      54.502  73.300  96.130  0.00  0.00      MON1  
ATOM   4604  N   THR M 288      53.569  74.215  97.942  0.00  0.00      MON1  
ATOM   4605  HN  THR M 288      53.033  74.090  98.783  0.00  0.00      MON1  
ATOM   4606  CA  THR M 288      53.880  75.559  97.512  0.00  0.00      MON1  
ATOM   4607  HA  THR M 288      54.105  75.576  96.457  0.00  0.00      MON1  
ATOM   4608  CB  THR M 288      52.748  76.525  97.751  0.00  0.00      MON1  
ATOM   4609  HB  THR M 288      52.497  76.577  98.838  0.00  0.00      MON1  
ATOM   4610  OG1 THR M 288      51.585  76.083  97.077  0.00  0.00      MON1  
ATOM   4611  HG1 THR M 288      51.778  76.215  96.136  0.00  0.00      MON1  
ATOM   4612  CG2 THR M 288      53.096  77.924  97.219  0.00  0.00      MON1  
ATOM   4613 HG21 THR M 288      53.620  77.885  96.245  0.00  0.00      MON1  
ATOM   4614 HG22 THR M 288      53.734  78.450  97.951  0.00  0.00      MON1  
ATOM   4615 HG23 THR M 288      52.174  78.530  97.111  0.00  0.00      MON1  
ATOM   4616  C   THR M 288      55.080  76.061  98.240  0.00  0.00      MON1  
ATOM   4617  O   THR M 288      55.243  75.801  99.424  0.00  0.00      MON1  
ATOM   4618  N   PHE M 289      55.956  76.799  97.546  0.00  0.00      MON1  
ATOM   4619  HN  PHE M 289      55.827  76.927  96.559  0.00  0.00      MON1  
ATOM   4620  CA  PHE M 289      57.054  77.511  98.147  0.00  0.00      MON1  
ATOM   4621  HA  PHE M 289      57.580  76.854  98.829  0.00  0.00      MON1  
ATOM   4622  CB  PHE M 289      58.010  78.131  97.127  0.00  0.00      MON1  
ATOM   4623  HB1 PHE M 289      58.695  78.867  97.606  0.00  0.00      MON1  
ATOM   4624  HB2 PHE M 289      57.390  78.630  96.359  0.00  0.00      MON1  
ATOM   4625  CG  PHE M 289      58.846  77.115  96.468  0.00  0.00      MON1  
ATOM   4626  CD1 PHE M 289      58.290  76.169  95.607  0.00  0.00      MON1  
ATOM   4627  HD1 PHE M 289      57.247  76.055  95.500  0.00  0.00      MON1  
ATOM   4628  CE1 PHE M 289      59.061  75.230  94.965  0.00  0.00      MON1  
ATOM   4629  HE1 PHE M 289      58.606  74.483  94.328  0.00  0.00      MON1  
ATOM   4630  CZ  PHE M 289      60.410  75.213  95.213  0.00  0.00      MON1  
ATOM   4631  HZ  PHE M 289      60.907  74.442  94.672  0.00  0.00      MON1  
ATOM   4632  CD2 PHE M 289      60.218  77.092  96.715  0.00  0.00      MON1  
ATOM   4633  HD2 PHE M 289      60.669  77.793  97.405  0.00  0.00      MON1  
ATOM   4634  CE2 PHE M 289      60.995  76.117  96.110  0.00  0.00      MON1  
ATOM   4635  HE2 PHE M 289      62.006  76.025  96.428  0.00  0.00      MON1  
ATOM   4636  C   PHE M 289      56.545  78.689  98.911  0.00  0.00      MON1  
ATOM   4637  O   PHE M 289      55.731  79.463  98.407  0.00  0.00      MON1  
ATOM   4638  N   VAL M 290      57.050  78.881 100.130  0.00  0.00      MON1  
ATOM   4639  HN  VAL M 290      57.691  78.227 100.540  0.00  0.00      MON1  
ATOM   4640  CA  VAL M 290      56.604  79.977 100.949  0.00  0.00      MON1  
ATOM   4641  HA  VAL M 290      56.081  80.711 100.353  0.00  0.00      MON1  
ATOM   4642  CB  VAL M 290      55.682  79.509 102.054  0.00  0.00      MON1  
ATOM   4643  HB  VAL M 290      56.211  78.798 102.734  0.00  0.00      MON1  
ATOM   4644  CG1 VAL M 290      55.182  80.713 102.856  0.00  0.00      MON1  
ATOM   4645 HG11 VAL M 290      54.842  81.504 102.157  0.00  0.00      MON1  
ATOM   4646 HG12 VAL M 290      55.952  81.111 103.532  0.00  0.00      MON1  
ATOM   4647 HG13 VAL M 290      54.318  80.413 103.483  0.00  0.00      MON1  
ATOM   4648  CG2 VAL M 290      54.500  78.767 101.411  0.00  0.00      MON1  
ATOM   4649 HG21 VAL M 290      54.834  77.862 100.863  0.00  0.00      MON1  
ATOM   4650 HG22 VAL M 290      53.948  79.424 100.708  0.00  0.00      MON1  
ATOM   4651 HG23 VAL M 290      53.814  78.399 102.185  0.00  0.00      MON1  
ATOM   4652  C   VAL M 290      57.808  80.670 101.520  0.00  0.00      MON1  
ATOM   4653  O   VAL M 290      58.889  80.100 101.624  0.00  0.00      MON1  
ATOM   4654  N   GLU M 291      57.652  81.969 101.824  0.00  0.00      MON1  
ATOM   4655  HN  GLU M 291      56.772  82.412 101.682  0.00  0.00      MON1  
ATOM   4656  CA  GLU M 291      58.651  82.797 102.437  0.00  0.00      MON1  
ATOM   4657  HA  GLU M 291      59.583  82.622 101.920  0.00  0.00      MON1  
ATOM   4658  CB  GLU M 291      58.230  84.269 102.275  0.00  0.00      MON1  
ATOM   4659  HB1 GLU M 291      58.904  84.957 102.833  0.00  0.00      MON1  
ATOM   4660  HB2 GLU M 291      57.217  84.402 102.725  0.00  0.00      MON1  
ATOM   4661  CG  GLU M 291      58.171  84.692 100.799  0.00  0.00      MON1  
ATOM   4662  HG1 GLU M 291      57.402  84.123 100.239  0.00  0.00      MON1  
ATOM   4663  HG2 GLU M 291      59.157  84.541 100.315  0.00  0.00      MON1  
ATOM   4664  CD  GLU M 291      57.816  86.166 100.720  0.00  0.00      MON1  
ATOM   4665  OE1 GLU M 291      58.767  86.989 100.658  0.00  0.00      MON1  
ATOM   4666  OE2 GLU M 291      56.604  86.479 100.649  0.00  0.00      MON1  
ATOM   4667  C   GLU M 291      58.903  82.514 103.901  0.00  0.00      MON1  
ATOM   4668  O   GLU M 291      60.044  82.498 104.351  0.00  0.00      MON1  
ATOM   4669  N   GLU M 292      57.851  82.284 104.693  0.00  0.00      MON1  
ATOM   4670  HN  GLU M 292      56.917  82.251 104.355  0.00  0.00      MON1  
ATOM   4671  CA  GLU M 292      58.033  82.101 106.109  0.00  0.00      MON1  
ATOM   4672  HA  GLU M 292      58.993  81.643 106.308  0.00  0.00      MON1  
ATOM   4673  CB  GLU M 292      57.915  83.412 106.904  0.00  0.00      MON1  
ATOM   4674  HB1 GLU M 292      57.965  83.175 107.995  0.00  0.00      MON1  
ATOM   4675  HB2 GLU M 292      56.925  83.884 106.714  0.00  0.00      MON1  
ATOM   4676  CG  GLU M 292      59.031  84.434 106.610  0.00  0.00      MON1  
ATOM   4677  HG1 GLU M 292      58.902  84.870 105.597  0.00  0.00      MON1  
ATOM   4678  HG2 GLU M 292      60.030  83.967 106.671  0.00  0.00      MON1  
ATOM   4679  CD  GLU M 292      58.972  85.570 107.617  0.00  0.00      MON1  
ATOM   4680  OE1 GLU M 292      58.163  85.487 108.576  0.00  0.00      MON1  
ATOM   4681  OE2 GLU M 292      59.758  86.542 107.461  0.00  0.00      MON1  
ATOM   4682  C   GLU M 292      57.003  81.144 106.627  0.00  0.00      MON1  
ATOM   4683  O   GLU M 292      56.081  80.744 105.914  0.00  0.00      MON1  
ATOM   4684  N   GLU M 293      57.160  80.732 107.889  0.00  0.00      MON1  
ATOM   4685  HN  GLU M 293      57.885  81.066 108.479  0.00  0.00      MON1  
ATOM   4686  CA  GLU M 293      56.223  79.839 108.510  0.00  0.00      MON1  
ATOM   4687  HA  GLU M 293      55.780  79.182 107.772  0.00  0.00      MON1  
ATOM   4688  CB  GLU M 293      56.897  78.970 109.580  0.00  0.00      MON1  
ATOM   4689  HB1 GLU M 293      56.120  78.340 110.075  0.00  0.00      MON1  
ATOM   4690  HB2 GLU M 293      57.353  79.631 110.351  0.00  0.00      MON1  
ATOM   4691  CG  GLU M 293      57.986  78.048 109.009  0.00  0.00      MON1  
ATOM   4692  HG1 GLU M 293      58.812  78.639 108.568  0.00  0.00      MON1  
ATOM   4693  HG2 GLU M 293      57.566  77.365 108.243  0.00  0.00      MON1  
ATOM   4694  CD  GLU M 293      58.556  77.219 110.145  0.00  0.00      MON1  
ATOM   4695  OE1 GLU M 293      57.990  76.128 110.417  0.00  0.00      MON1  
ATOM   4696  OE2 GLU M 293      59.545  77.683 110.772  0.00  0.00      MON1  
ATOM   4697  C   GLU M 293      55.097  80.649 109.172  0.00  0.00      MON1  
ATOM   4698  OT1 GLU M 293      53.911  80.439 108.797  0.00  0.00      MON1  
ATOM   4699  OT2 GLU M 293      55.394  81.459 110.093  0.00  0.00      MON1  
ATOM   4700  OH2 TIP3W   1      57.344  76.521  74.758  0.00  0.00      WAT   
ATOM   4701  H1  TIP3W   1      57.571  76.663  75.686  0.00  0.00      WAT   
ATOM   4702  H2  TIP3W   1      58.206  76.665  74.320  0.00  0.00      WAT   
ATOM   4703  OH2 TIP3W   2      53.630  74.141  60.947  0.00  0.00      WAT   
ATOM   4704  H1  TIP3W   2      54.120  74.940  61.167  0.00  0.00      WAT   
ATOM   4705  H2  TIP3W   2      52.858  74.168  61.535  0.00  0.00      WAT   
ATOM   4706  OH2 TIP3W   3      58.806  75.765  54.546  0.00  0.00      WAT   
ATOM   4707  H1  TIP3W   3      57.840  75.757  54.512  0.00  0.00      WAT   
ATOM   4708  H2  TIP3W   3      58.998  76.655  54.199  0.00  0.00      WAT   
ATOM   4709  OH2 TIP3W   4      56.433  69.945  55.314  0.00  0.00      WAT   
ATOM   4710  H1  TIP3W   4      55.861  69.983  56.098  0.00  0.00      WAT   
ATOM   4711  H2  TIP3W   4      56.286  70.811  54.900  0.00  0.00      WAT   
ATOM   4712  OH2 TIP3W   5      64.179  64.972  71.975  0.00  0.00      WAT   
ATOM   4713  H1  TIP3W   5      65.133  64.845  71.871  0.00  0.00      WAT   
ATOM   4714  H2  TIP3W   5      64.082  65.933  71.898  0.00  0.00      WAT   
ATOM   4715  OH2 TIP3W   6      59.890  75.339  63.142  0.00  0.00      WAT   
ATOM   4716  H1  TIP3W   6      60.271  76.135  63.592  0.00  0.00      WAT   
ATOM   4717  H2  TIP3W   6      60.738  74.881  62.954  0.00  0.00      WAT   
ATOM   4718  OH2 TIP3W   7      61.496  77.123  84.399  0.00  0.00      WAT   
ATOM   4719  H1  TIP3W   7      61.355  76.831  85.316  0.00  0.00      WAT   
ATOM   4720  H2  TIP3W   7      62.156  77.834  84.493  0.00  0.00      WAT   
ATOM   4721  OH2 TIP3W   8      54.274  72.621  58.748  0.00  0.00      WAT   
ATOM   4722  H1  TIP3W   8      54.101  73.106  59.583  0.00  0.00      WAT   
ATOM   4723  H2  TIP3W   8      54.154  73.335  58.105  0.00  0.00      WAT   
ATOM   4724  OH2 TIP3W   9      53.428  75.606  56.955  0.00  0.00      WAT   
ATOM   4725  H1  TIP3W   9      53.675  76.075  56.140  0.00  0.00      WAT   
ATOM   4726  H2  TIP3W   9      52.543  75.952  57.150  0.00  0.00      WAT   
ATOM   4727  OH2 TIP3W  10      56.240  72.938  54.458  0.00  0.00      WAT   
ATOM   4728  H1  TIP3W  10      55.706  72.968  55.260  0.00  0.00      WAT   
ATOM   4729  H2  TIP3W  10      56.056  73.841  54.132  0.00  0.00      WAT   
ATOM   4730  OH2 TIP3W  11      66.729  64.304  71.347  0.00  0.00      WAT   
ATOM   4731  H1  TIP3W  11      67.278  63.627  71.795  0.00  0.00      WAT   
ATOM   4732  H2  TIP3W  11      66.351  63.805  70.613  0.00  0.00      WAT   
ATOM   4733  OH2 TIP3W  12      54.429  67.698  52.257  0.00  0.00      WAT   
ATOM   4734  H1  TIP3W  12      55.359  67.710  52.495  0.00  0.00      WAT   
ATOM   4735  H2  TIP3W  12      54.060  66.916  52.705  0.00  0.00      WAT   
ATOM   4736  OH2 TIP3W  13      63.628  79.083  61.011  0.00  0.00      WAT   
ATOM   4737  H1  TIP3W  13      64.397  78.618  60.607  0.00  0.00      WAT   
ATOM   4738  H2  TIP3W  13      63.280  79.512  60.228  0.00  0.00      WAT   
ATOM   4739  OH2 TIP3W  14      65.891  77.543  65.267  0.00  0.00      WAT   
ATOM   4740  H1  TIP3W  14      65.554  77.504  66.196  0.00  0.00      WAT   
ATOM   4741  H2  TIP3W  14      66.847  77.578  65.382  0.00  0.00      WAT   
ATOM   4742  OH2 TIP3W  15      62.537  82.282  58.548  0.00  0.00      WAT   
ATOM   4743  H1  TIP3W  15      63.253  82.603  57.982  0.00  0.00      WAT   
ATOM   4744  H2  TIP3W  15      62.282  81.436  58.173  0.00  0.00      WAT   
ATOM   4745  OH2 TIP3W  16      61.676  77.005  60.522  0.00  0.00      WAT   
ATOM   4746  H1  TIP3W  16      62.433  77.420  60.073  0.00  0.00      WAT   
ATOM   4747  H2  TIP3W  16      61.759  77.362  61.417  0.00  0.00      WAT   
ATOM   4748  OH2 TIP3W  17      54.030  68.817  69.152  0.00  0.00      WAT   
ATOM   4749  H1  TIP3W  17      54.858  69.269  68.943  0.00  0.00      WAT   
ATOM   4750  H2  TIP3W  17      54.183  68.606  70.089  0.00  0.00      WAT   
ATOM   4751  OH2 TIP3W  18      63.561  76.199  64.822  0.00  0.00      WAT   
ATOM   4752  H1  TIP3W  18      64.313  76.835  64.784  0.00  0.00      WAT   
ATOM   4753  H2  TIP3W  18      62.816  76.754  64.483  0.00  0.00      WAT   
ATOM   4754  OH2 TIP3W  19      62.379  74.292  63.122  0.00  0.00      WAT   
ATOM   4755  H1  TIP3W  19      63.100  74.273  62.476  0.00  0.00      WAT   
ATOM   4756  H2  TIP3W  19      62.754  74.903  63.785  0.00  0.00      WAT   
ATOM   4757  OH2 TIP3W  20      57.131  58.301  71.986  0.00  0.00      WAT   
ATOM   4758  H1  TIP3W  20      56.172  58.404  71.908  0.00  0.00      WAT   
ATOM   4759  H2  TIP3W  20      57.247  57.341  71.909  0.00  0.00      WAT   
ATOM   4760  OH2 TIP3W  21      54.579  58.969  71.359  0.00  0.00      WAT   
ATOM   4761  H1  TIP3W  21      54.023  59.653  71.787  0.00  0.00      WAT   
ATOM   4762  H2  TIP3W  21      55.033  59.475  70.674  0.00  0.00      WAT   
ATOM   4763  OH2 TIP3W  22      46.830  69.934  48.754  0.00  0.00      WAT   
ATOM   4764  H1  TIP3W  22      46.811  70.418  49.597  0.00  0.00      WAT   
ATOM   4765  H2  TIP3W  22      45.946  69.550  48.698  0.00  0.00      WAT   
END
